# Supplementary material for: Organocatalytic inverse-electron-demand Diels–Alder reaction between 5-alkenyl thiazolones and β,γ-unsaturated carbonyl compounds
Source: Royal Society of Chemistry journal article supplement (doi:10.1039/d2cc00457g), 2022-01-01
Supplement: d2cc00457g1.pdf [file d2cc00457g1.pdf]

# Organocatalytic inverse-electron-demand Diels–Alder reaction between 5-alkenyl thiazolones and $\beta,\gamma$ -unsaturated carbonyl compounds

Kai-Xuan Yang, Dong-Sheng Ji, Yucheng Gu\* and Peng-Fei Xu\*

*State Key Laboratory of Applied Organic Chemistry, College of Chemistry and  
Chemical Engineering, Lanzhou University, Lanzhou 730000, P. R. China*

## Supporting Information

|                                                                                                |    |
|------------------------------------------------------------------------------------------------|----|
| 1 General Information.....                                                                     | 2  |
| 2 Procedure of Experiments.....                                                                | 2  |
| 2.1 General Procedure for the Synthesis of Substrates. ....                                    | 2  |
| 2.2 General Procedure of the oxa-Diels-Alder Reaction.....                                     | 4  |
| 2.3 Procedure for the Derivatization. ....                                                     | 5  |
| 2.4 The Procedure of the Gram-scale Asymmetric Synthesis of 3aa .....                          | 5  |
| 3 Reaction conditions optimization of $\beta,\gamma$ -Unsaturated amides.....                  | 7  |
| 4. Characterization Data of Compounds .....                                                    | 11 |
| 5 X-ray Crystallographic Data .....                                                            | 34 |
| 5. 1. Preparation of crystal. ....                                                             | 35 |
| 5. 2 X-ray Crystallographic Data .....                                                         | 36 |
| 6 The Discussion and Determination of Absolute Configuration of Compound 3a <sub>2</sub> ..... | 39 |
| 7 HPLC and NMR Spectrogram.....                                                                | 39 |

## 1 General Information

Chemicals and solvents were either purchased from commercial suppliers or purified by standard techniques. Analytical thin-layer chromatography (TLC) was performed on silica gel plates with F-254 indicator and compounds were visualized by irradiation with UV light. Flash chromatography was carried out utilizing silica gel 200-300 mesh.  $^1\text{H}$  NMR,  $^{13}\text{C}$  NMR spectra were recorded on a 400 spectrometer (400 MHz  $^1\text{H}$ , 100 MHz  $^{13}\text{C}$ ) or a 600 spectrometer (600 MHz  $^1\text{H}$ , 150 MHz  $^{13}\text{C}$ ). The spectra were recorded in  $\text{CDCl}_3$  as the solvent at room temperature,  $^1\text{H}$  and  $^{13}\text{C}$  NMR chemical shifts are reported in ppm relative to either the residual solvent peak ( $^{13}\text{C}$ ) ( $\delta = 77.00$  ppm) or TMS ( $^1\text{H}$ ) ( $\delta = 0$  ppm) as an internal standard. Data for  $^1\text{H}$  NMR are reported as follows: chemical shift ( $\delta$  ppm), multiplicity (s = singlet, d = doublet, t = triplet, m = multiplet, br = broad), integration, coupling constant (Hz) and assignment. Data for  $^{13}\text{C}$  NMR are reported as chemical shift. HRMS were performed on mass instrument (ESI). Enantiomeric excess values were determined by HPLC with Chirapak column on Agilent 1260 series with *i*-PrOH, *n*-hexane,  $\text{NEt}_3$  and DCM. Optical rotation was measured on the Perkin Elmer 341 polarimeter with  $[\alpha]_{\text{D}}$  values reported in degrees. Concentration (c) is in 10 g/mL.

## 2 Procedure of Experiments

### 2.1 General Procedure for the Synthesis of Substrates.

#### 2.1.1 General procedure for the synthesis of $\beta,\gamma$ -Unsaturated Carbonyl Compounds

##### Method A

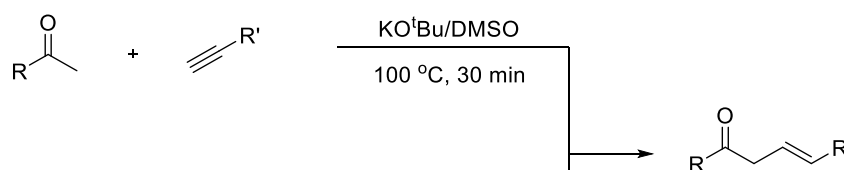

##### Method B

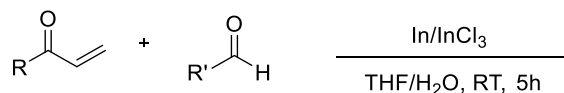

**Method A:**<sup>1</sup> A mixture of the corresponding methyl ketone (5.0 mmol, 1 equiv.), alkyne (5.0 mmol, 1 equiv.) and  $\text{KO}^t\text{Bu}$  (561 mg, 5.0 mmol, 1 equiv.) in DMSO (12 mL) was heated to 100 °C and stirred for 30 min. The reaction mixture was cooled to room temperature and was diluted with  $\text{H}_2\text{O}$  (12 mL), neutralized with a saturated aqueous solution of  $\text{NH}_4\text{Cl}$ , and extracted with  $\text{Et}_2\text{O}$  (12 mL  $\times$  4). The organic extract was washed with  $\text{H}_2\text{O}$  (6 mL  $\times$  3) and dried with  $\text{MgSO}_4$ . After filtration

the solvent was evaporated under reduced pressure and the crude product was purified by flash column chromatography (eluent hexane/ethyl acetate 97/3).

**Method B:** A mixture of the corresponding aldehyde (5.0 mmol, 1 equiv.), In powder (1.15 g, 10 mmol, 2 equiv.),  $\text{InCl}_3$  (553 mg, 2.5 mmol, 0.5 equiv.) and the corresponding vinyl ketone (15 mmol, 3 equiv.) in a mixture of THF and  $\text{H}_2\text{O}$  (1: 1, 30 mL) was stirred at room temperature for 8 h. After the addition of 1 M HCl (15 mL), the reaction mixture was stirred for 30 min and extracted with ethyl acetate (50 mL  $\times$  4). The combined organic phases were washed with brine (100 mL) and dried with  $\text{MgSO}_4$ . After filtration, the solvent was evaporated under reduced pressure and the crude product was purified by flash column chromatography (eluent hexane/ethyl acetate 97/3).

### 2.1.2 General procedure for the synthesis of 5-alkenyl thiazolone 1

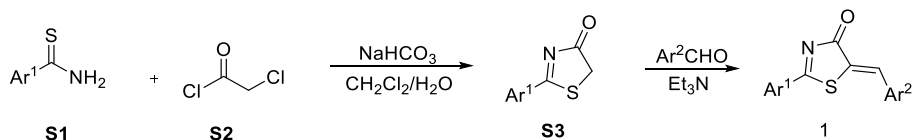

<sup>3</sup>The solution of  $\text{NaHCO}_3$  (20 mmol in 20 mL water) was added to a  $\text{CH}_2\text{Cl}_2$  (40 mL) solution of thiobenzamide S1 (10 mmol). After cooling to 0 °C with ice-water bath, chloroacetyl chloride (S2 10 mmol) was added drop-wise to the stirred solution. Then reaction mixture was then stirred overnight at room temperature. The organic phase of the reaction mixture was separated, aqueous phase was extracted with  $\text{CH}_2\text{Cl}_2$  (50 mL  $\times$  2). The combined organic phase was washed with  $\text{H}_2\text{O}$  (40 mL  $\times$  2), dried with anhydrous  $\text{Na}_2\text{SO}_4$ , and evaporated to dryness. The solid residue was washed with EtOH and filtered to give S3 (yiled 70%). Compound S3 (1 mmol), benzaldehyde (1.1 mmol), and  $\text{Et}_3\text{N}$  (2 mmol) were dissolved in 20 mL of MeOH, and heated to reflux at 65°C for 3h, during which some precipitate appear gradually. After cooling to room temperature, the precipitate was filtered, and washed with another 20 mL of cold MeOH. The 5-alkenyl thiazolone 1 was obtained as a solid.

### References

- <sup>1</sup>B. A. Trofimov, E. Y. Schmidt, N. V. Zorina, E. V. Ivanova, I. A. Ushakov, *J. Org. Chem.* **2012**, *77*, 6880– 6886.
- <sup>2</sup>Chen, Y, Wang, Y, Huang, H. *Org. Lett.* **2020**, *22*, 7135–7140. S. Kang, T. S. Jang, G. Keum, S. B. Kang, S. Y. Han, Y. Kim, *Org. Lett.* **2000**, *2*, 3615–3617.
- <sup>3</sup>Lin, Li, Yang, Yuhong, Wang, Mei, Lai, Luhao, Guoa, Yarong, Wang, Rui. *Chem. Commun.*, **2015**, *51*, 8134--8137

## 2.2 General Procedure of the oxa-Diels-Alder Reaction.

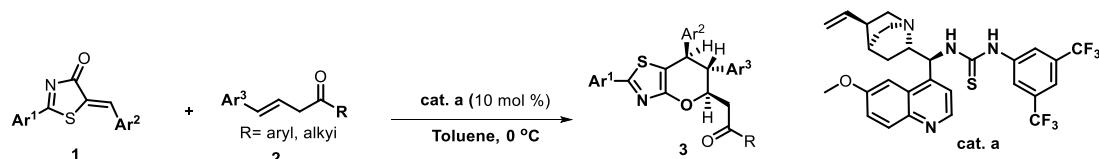

To a test tube (flame dried) with a stirrer were successively added 5-alkenyl thiazolone **1** (0.1 mmol, 26.5 mg), β,γ-unsaturated carbonyl compounds **2** (0.15 mmol, 33.3 mg), **catalyst a** (0.01 mmol, 6.3 mg) and dried toluene (precooled to 0 °C) (0.5 mL) at 0 °C. When TLC analysis showed that **1** was completely consumed, the solvent was evaporated under reduced pressure and the residue was purified by silica gel flash column chromatography (Petroleumether/EtOAc/DCM=10:1:2) to give the corresponding compound **3a**. Chiral **3b-4l** were synthesized using the same method.

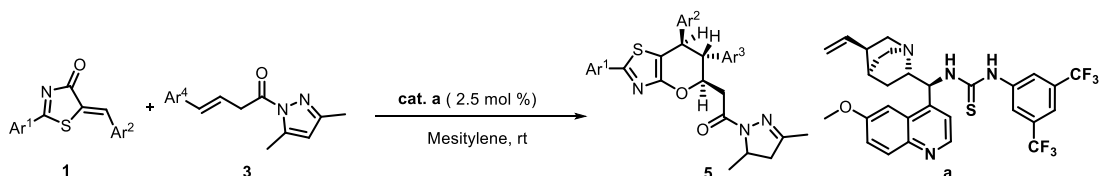

To a test tube (flame dried) with a stirrer were successively added 5-alkenyl thiazolone **1** (0.1 mmol, 26.5 mg), β,γ-unsaturated carbonyl compounds (0.15 mmol, 36.0 mg), **catalyst a** (0.0025 mmol, 1.5 mg) and dried mesitylene (0.5 mL) at room temperature. When TLC analysis showed that **1** was completely consumed, the solvent was evaporated under reduced pressure and the residue was purified by silica gel flash column chromatography (Petroleumether/EtOAc=10:1 to 5:1) to give a pair of corresponding enantiomers, **5a** was separated by cyclic preparative HPLC. Chiral **5b-5j** were synthesized using the same method.



## 2.3 Procedure for the Derivatization.

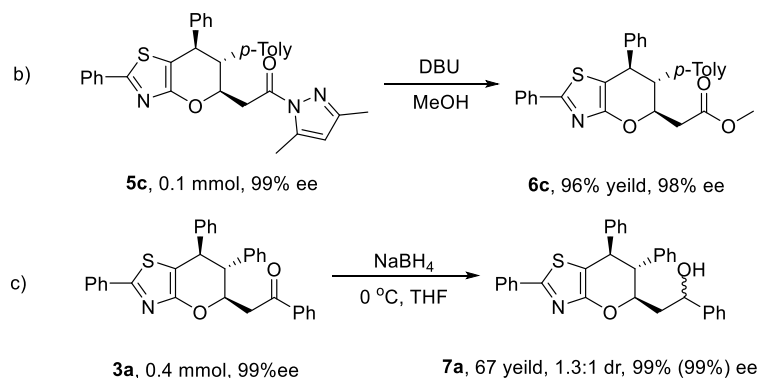

### 2.3.1 Synthesis of ester 6c

Compound **5c** (52.0 mg, 0.1 mmol) and DBU (3.5 mg, 0.024 mmol) in 1 mL MeOH were stirred for 3 hours at room temperature. After removal of the solvent under reduced pressure, the reaction mixture was purified by silica gel column chromatography (hexane/EtOAc = 8/1) to give product **6c** (96% yield, 43.7 mg, 98% ee).

### 2.3.2 Synthesis of alcohol 7a

Compound **3a** (195.0 mg, 0.4 mmol, 1.0 equiv.) in THF (3.08 mL) were cooled to 0 °C, then NaBH<sub>4</sub> (22.6 mg, 0.6 mmol, 1.5 equiv.) was added. The reaction mixture was warstirred for additional 0.5 hours. After that, the reaction was quenched by 1 N HCl (0.5 mL and extracted with CH<sub>2</sub>Cl<sub>2</sub> (15 mL×3). The combined organic layers were dried over Na<sub>2</sub>SO<sub>4</sub>. After removal of the solvent under reduced pressure, the crude was purified by silica gel column chromatography (hexane/EtOAc = 1/1) to give product **7a** (67% yield, 131.2 mg, 99% ee).

## 2.4 The Procedure of the Gram-scale Asymmetric Synthesis of 3a

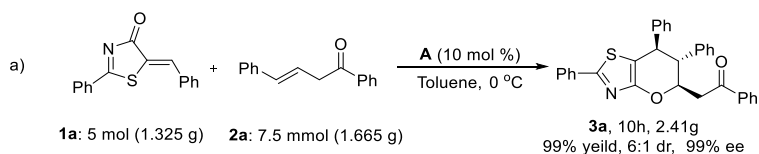

In a 25 mL round-bottomed flame dried flask, **1a** (5 mmol, 1.325g),  $\beta,\gamma$ -unsaturated ketones **2a** (7.5 mmol, 1.665g) and **cat. A** (0.1 mmol, 0.12g) were successively added, 25 mL toluene (precooled to 0 °C) was added by syringe, and the mixture was stirred for 10 hours at

0 °C. Then the solvent was evaporated under reduced pressure and the residue was purified by silica gel flash column chromatography (Petroleum ether/EtOAc/DCM=10:1:2) to give the corresponding compound **3a** (2.41g, 99% yield, 6:1 dr, 99% ee).

### 3 Reaction conditions optimization of $\beta,\gamma$ -unsaturated amides

#### 3.1 Screening data of $\beta,\gamma$ -unsaturated ketone

Table S1. Catalyst screening of  $\beta,\gamma$ -unsaturated ketone

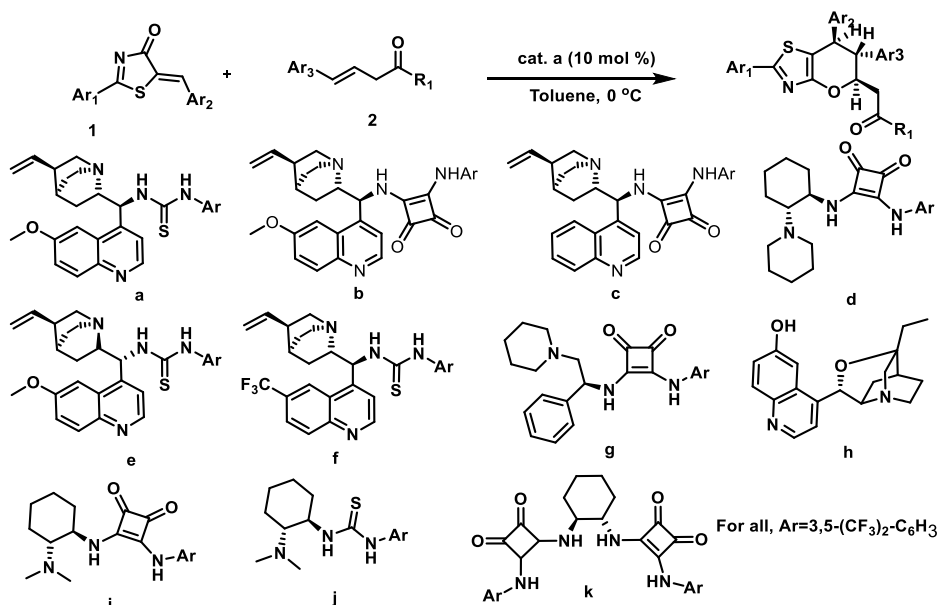

| Entry <sup>a</sup> | Catalyst | Dr (%) <sup>b</sup> | Yield (%) <sup>c</sup> | ee (%) <sup>d</sup> | Time (h) |
|--------------------|----------|---------------------|------------------------|---------------------|----------|
| 1                  | a        | 6:1                 | 95                     | 89                  | 6        |
| 2                  | b        | 4:1                 | 80                     | 96                  | 6        |
| 3                  | c        | 6:1                 | 77                     | 94                  | 8        |
| 4                  | d        | 5:1                 | 62                     | 89                  | 12       |
| 5                  | e        | 5:1                 | 62                     | -89                 | 12       |
| 6                  | f        | 5:1                 | 58                     | 90                  | 8        |
| 7                  | g        | 4:1                 | 53                     | 78                  | 8        |
| 8                  | h        | 2:1                 | 62                     | 78                  | 12       |
| 9                  | i        | 3:1                 | 32                     | 64                  | 12       |
| 10                 | j        | 3:1                 | 93                     | -90                 | 8        |
| 11                 | k        | 3:1                 | 73                     | 64                  | 8        |

Conditions: <sup>a</sup>Reactions performed with 0.1 mmol **1a**, 0.1 mmol **2a**, catalyst (10% mmol) in solvent (1 mL) at rt. <sup>b</sup>Determined by crude <sup>1</sup>H NMR analysis. <sup>c</sup>Isolated yield given. <sup>d</sup>Determined by chiral-phase HPLC analysis.

Table S2. Solvent screening of  $\beta,\gamma$ -unsaturated ketone

| Entry <sup>a</sup> | Solvent           | Dr (%) <sup>b</sup> | Yield (%) <sup>c</sup> | ee (%) <sup>d</sup> | Time (h) |
|--------------------|-------------------|---------------------|------------------------|---------------------|----------|
| 12                 | DCE               | 4:1                 | 93                     | 90                  | 5        |
| 13                 | ACN               | 5:1                 | 96                     | 89                  | 8        |
| 14                 | CHCl <sub>3</sub> | 3:1                 | 87                     | 91                  | 12       |
| 15                 | THF               | 4:1                 | 93                     | 90                  | 8        |
| 16                 | 1,4-dioxane       | 3:1                 | 85                     | 94                  | 6        |
| 17                 | Xylene            | 4:1                 | 98                     | 90                  | 8        |
| 18                 | Mesitylene        | 3:1                 | 83                     | 89                  | 8        |

Conditions: <sup>a</sup>Reactions performed with 0.1 mmol **1a**, 0.1 mmol **2a**, catalyst (10% mmol) in solvent (1 mL) at rt. <sup>b</sup>Determined by crude <sup>1</sup>H NMR analysis. <sup>c</sup> Isolated yield given. <sup>d</sup>Determined by chiral-phase HPLC analysis.

Table S3. Optimization of other reaction conditions for  $\beta,\gamma$ -unsaturated ketone

| Entry <sup>a</sup>    | 1a<br>(mmol) | 2a<br>(mmol) | Solvent    | Cat (mol%) | Dr(%) <sup>b</sup> | Yield<br>(%) <sup>c</sup> | ee (%) <sup>d</sup> | Time (h)  |
|-----------------------|--------------|--------------|------------|------------|--------------------|---------------------------|---------------------|-----------|
| 19                    | 0.1          | 0.1          | 1          | 5          | 4:1                | 89                        | 87                  | 10        |
| 20                    | 0.1          | 0.1          | 1          | 15         | 5:1                | 94                        | 80                  | 4         |
| 21                    | 0.1          | 0.125        | 1          | 10         | 6:1                | 93                        | 90                  | 6         |
| 22                    | 0.1          | 0.15         | 1          | 10         | 6:1                | 98                        | 90                  | 6         |
| 23                    | 0.125        | 0.1          | 1          | 10         | 5:1                | 96                        | 90                  | 6         |
| 24                    | 0.15         | 0.1          | 1          | 10         | 4:1                | 98                        | 92                  | 6         |
| 25                    | 0.1          | 0.15         | 0.5        | 10         | 6:1                | 97                        | 92                  | 5         |
| 26                    | 0.1          | 0.15         | 2          | 10         | 5:1                | 94                        | 87                  | 7         |
| 27 <sup>e</sup>       | 0.1          | 0.15         | 2          | 10         | 5:1                | 95                        | 83                  | 8         |
| <b>28<sup>f</sup></b> | <b>0.1</b>   | <b>0.15</b>  | <b>0.5</b> | <b>10</b>  | <b>6:1</b>         | <b>98</b>                 | <b>99</b>           | <b>24</b> |
| 29 <sup>h</sup>       | 0.1          | 0.15         | 0.5        | 10         | 6:1                | 94                        | 99                  | 36        |

Conditions: <sup>a</sup>Reactions performed with catalyst (2.5% mmol) in solvent at rt. <sup>b</sup>Determined by crude <sup>1</sup>H NMR analysis. <sup>c</sup>Isolated yield given.  
<sup>d</sup>Determined by chiral-phase HPLC analysis. <sup>e</sup>4A MS molecular sieve was added. <sup>f</sup>Reactions performed at 0 °C. <sup>h</sup>Reaction performed at -10 °C

Table S4. Catalyst screening of  $\beta,\gamma$ -unsaturated amides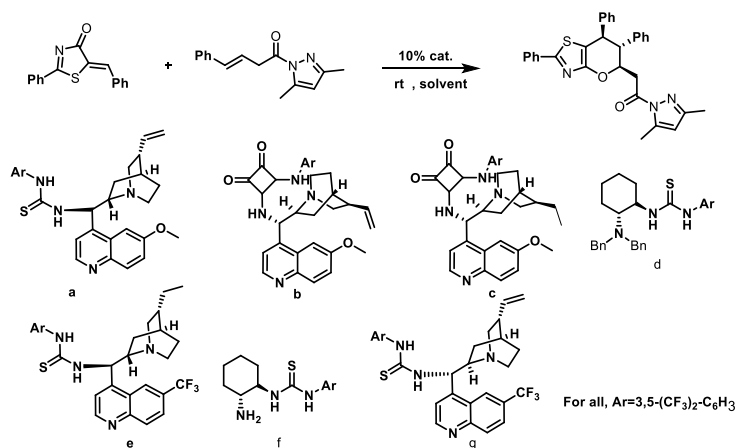

| Entry <sup>a</sup> | Catalyst | Dr (%) <sup>b</sup> | Yield (%) <sup>c</sup> | Ee (%) <sup>d</sup> | Time (h) |
|--------------------|----------|---------------------|------------------------|---------------------|----------|
| 1                  | a        | 6:1                 | 95                     | >99                 | 3        |
| 2                  | b        | 2.5:1               | 36                     | 87                  | 48       |
| 3                  | c        | 2.5:1               | 15                     | >99                 | 48       |
| 4                  | d        | 3:1                 | 82                     | >99                 | 12       |
| 5                  | e        | 5:1                 | 95                     | >99                 | 6        |
| 6                  | f        | 5.2:1               | 62                     | 83                  | 7        |
| 7                  | g        | 3:1                 | 73                     | -35                 | 7        |

Conditions: <sup>a</sup>Reactions performed with 0.1 mmol **1a**, 0.1 mmol **2a**, catalyst (10% mmol) in solvent (1 mL) at rt. <sup>b</sup>Determined by crude <sup>1</sup>H NMR analysis. <sup>c</sup> Isolated yield given. <sup>d</sup>Determined by chiral-phase HPLC analysis.

Table S5. Solvent screening of  $\beta,\gamma$ -unsaturated amides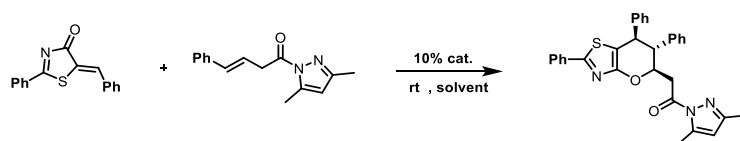

| Entry <sup>a</sup> | Solvent                | Dr (%) <sup>b</sup> | Yield (%) <sup>c</sup> | Ee (%) <sup>d</sup> | Time (h) |
|--------------------|------------------------|---------------------|------------------------|---------------------|----------|
| 8                  | DCM                    | 4:1                 | 94                     | >99                 | 12       |
| 9                  | DCE                    | 4:1                 | 93                     | >99                 | 13       |
| 10                 | ACN                    | 4:1                 | 95                     | >99                 | 8        |
| 11                 | CHCl <sub>3</sub>      | 3:1                 | 87                     | >99                 | 12       |
| 12                 | THF                    | 5:1                 | 85                     | >99                 | 12       |
| 13                 | 1,4-dioxane            | 7:1                 | 94                     | >99                 | 4        |
| 14                 | Diethyl ether          | 2:1                 | 45                     | >99                 | 24       |
| 15                 | CH <sub>3</sub> OH     | 1:1                 | 35                     | -                   | 24       |
| 16                 | EA                     | 2:1                 | 89                     | -                   | 12       |
| 17                 | 1,3-Dioxolane          | 5:1                 | 95                     | >99                 | 3        |
| 18                 | 2-CH <sub>3</sub> -THF | 4:1                 | 95                     | >99                 | 10       |
| 19                 | Xylene                 | 6:1                 | 93                     | >99                 | 3        |
| 20                 | Mesitylene             | 7:1                 | 96                     | >99                 | 3        |
| 21                 | PhCl                   | 6:1                 | 87                     | >99                 | 5        |
| 22                 | PhBr                   | 7:1                 | 83                     | >99                 | 5        |
| 23                 | PhCF <sub>3</sub>      | 5:1                 | 92                     | >99                 | 5        |

Conditions: <sup>a</sup>Reactions performed with 0.1 mmol **1a**, 0.1 mmol **2a**, catalyst (10% mmol) in solvent (1 mL) at rt. <sup>b</sup>Determined by crude <sup>1</sup>H NMR analysis. <sup>c</sup> Isolated yield given. <sup>d</sup>Determined by chiral-phase HPLC analysis

Table S6. Catalyst dosage screening of  $\beta,\gamma$ -unsaturated amides

| Entry <sup>a</sup> | Cat      | Dr (%) <sup>b</sup> | Yield (%) <sup>c</sup> | Ee (%) <sup>d</sup> | Time (h) |
|--------------------|----------|---------------------|------------------------|---------------------|----------|
| 24                 | 20 mol%  | 7:1                 | 99                     | >99                 | 3        |
| 25                 | 15 mol%  | 8:1                 | 96                     | >99                 | 3        |
| 26                 | 10 mol%  | 7:1                 | 97                     | >99                 | 3        |
| 27                 | 5 mol%   | 8:1                 | 98                     | >99                 | 9        |
| 28                 | 2.5 mol% | 8:1                 | 92                     | >99                 | 24       |
| 29                 | 1 mol%   | 7:1                 | 76                     | >99                 | 72       |

Conditions: <sup>a</sup>Reactions performed with 0.1 mmol **1a**, 0.1 mmol **2a**, catalyst (10% mmol) in solvent (1 mL) at rt. <sup>b</sup>Determined by crude <sup>1</sup>H NMR analysis. <sup>c</sup>Isolated yield given. <sup>d</sup>Determined by chiral-phase HPLC analysis.

Table S7. Screening of substrate ratio and solvent amount of  $\beta,\gamma$ -unsaturated amides

| Entry <sup>a</sup> | <b>1a</b><br>(mmol) | <b>2a</b><br>(mmol) | Dr (%) <sup>b</sup> | Solvent<br>(ml) | Yield (%) <sup>c</sup> | Ee<br>(%) <sup>d</sup> | Time (h)  |
|--------------------|---------------------|---------------------|---------------------|-----------------|------------------------|------------------------|-----------|
| 30                 | 0.1                 | 0.125               | 8:1                 | 1               | 99                     | >99                    | 18        |
| 31                 | 0.1                 | 0.15                | 8:1                 | 1               | 96                     | >99                    | 14        |
| 32                 | 0.1                 | 0.2                 | 8:1                 | 1               | 97                     | >99                    | 9         |
| 33                 | 0.125               | 0.1                 | 7:1                 | 1               | 98                     | >99                    | 16        |
| 34                 | 0.15                | 0.1                 | 7:1                 | 1               | 92                     | >99                    | 14        |
| 35                 | 0.1                 | 0.15                | 7:1                 | 0.25            | 91                     | >99                    | 14        |
| <b>36</b>          | <b>0.1</b>          | <b>0.15</b>         | <b>8:1</b>          | <b>0.5</b>      | <b>96</b>              | <b>&gt;99</b>          | <b>14</b> |
| 37                 | 0.1                 | 0.15                | 7:1                 | 2               | 95                     | >99                    | 14        |
| 38 <sup>e</sup>    | 0.1                 | 0.15                | 7:1                 | 0.5             | 94                     | >99                    | 14        |
| 39 <sup>f</sup>    | 0.1                 | 0.15                | 7:1                 | 0.5             | 96                     | >99                    | 10        |

Conditions: <sup>a</sup>Reactions performed with catalyst (2.5% mmol) in solvent at rt. <sup>b</sup>Determined by crude <sup>1</sup>H NMR analysis. <sup>c</sup>Isolated yield given. <sup>d</sup>Determined by chiral-phase HPLC analysis. <sup>e</sup>4A MS molecular sieve was added. <sup>f</sup>Reactions performed at 0 °C.

## 4. Characterization Data of Compounds

### 1-phenyl-2-((5R,6R,7R)-2,6,7-triphenyl-6,7-dihydro-5H-pyrano[2,3-d]thiazol-5-yl)ethan-1-one (3a)

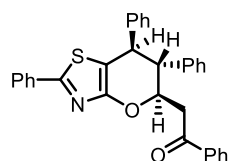

White solid (PE/EtOAc/DCM = 10:1:1, 98% isolated yield, 6:1 dr, 47.8 mg);

m. p.: 148-151 °C;

$[\alpha]^{22}_{\text{D}} = -14.0$  ( $c=1.0$ ,  $\text{CH}_2\text{Cl}_2$ , 99% ee);

$^1\text{H NMR}$  (400 MHz,  $\text{CDCl}_3$ )  $\delta$  7.92 – 7.78 (m, 4H), 7.50 (t,  $J = 7.6$  Hz, 1H), 7.36 (ddd,  $J = 11.2, 8.0, 6.0$  Hz, 5H), 7.22 – 7.12 (m, 6H), 7.08 – 6.84 (m, 4H), 5.37 (ddd,  $J = 10.8, 8.0, 2.8$  Hz, 1H), 4.36 (d,  $J = 10.8$  Hz, 1H), 3.45 (dd,  $J = 16.8, 8.0$  Hz, 1H), 3.20 (t,  $J = 10.8$  Hz, 1H), 2.87 (dd,  $J = 16.8, 2.8$  Hz, 1H);

$^{13}\text{C NMR}$  (101 MHz,  $\text{CDCl}_3$ )  $\delta$  196.4, 163.9, 159.8, 142.1, 138.7, 137.0, 133.4, 133.0, 129.9, 128.8, 128.7, 128.4, 128.2, 128.1, 128.0, 127.4, 127.2, 125.6, 109.4, 77.5, 53.7, 47.7, 41.7.

HPLC (IH,  $i$ -PrOH/  $n$ -hexane = 93/7), flow rate = 1.0 mL/min,  $t_{\text{R}} = 26.50$  min (major);

HRMS (ESI):  $[\text{M}+\text{H}]^+$  calcd for  $[\text{C}_{32}\text{H}_{26}\text{NO}_2\text{S}]^+$ : 488.1679, found: 488.1679.

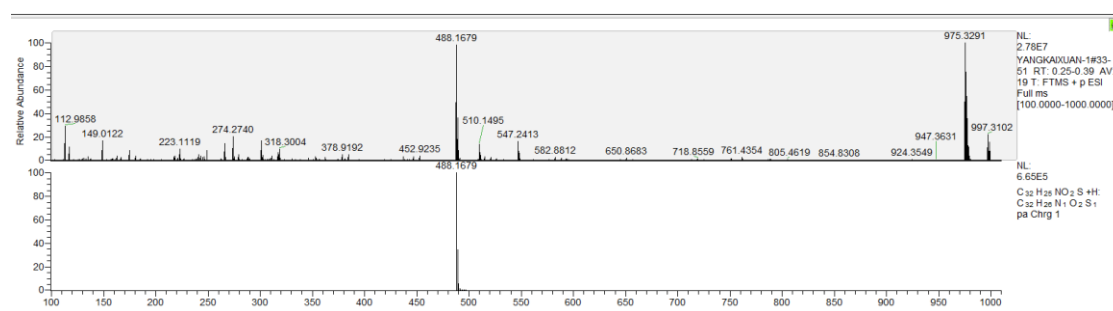

### 2-((5R,6R,7R)-7-(4-chlorophenyl)-2,6-diphenyl-6,7-dihydro-5H-pyrano[2,3-d]thiazol-5-yl)-1-phenylethan-1-one (3b)

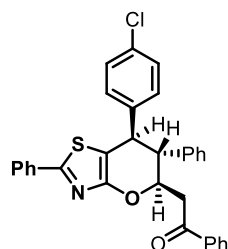

Yellow solid (PE/EtOAc/DCM = 10:1:1, 93% isolated yield, 7:1 dr, 48.6 mg);

m. p.: 66-68 °C.

$[\alpha]^{22}_{\text{D}} = -8.0$  ( $c=1.0$ ,  $\text{CH}_2\text{Cl}_2$ , 99% ee);

$^1\text{H NMR}$  (400 MHz,  $\text{CDCl}_3$ )  $\delta$  7.84 (m,  $J = 11.6, 6.8, 1.2$  Hz, 4H), 7.55 – 7.47 (m, 1H), 7.38 (m,  $J = 6.4, 5.2$  Hz, 5H), 7.28 – 7.08 (m, 5H), 7.00 (d,  $J = 6.8$  Hz, 2H), 6.91 – 6.81 (m, 2H), 5.36 (ddd,  $J = 10.8, 8.8, 2.4$  Hz, 1H), 4.35 (d,  $J = 10.8$  Hz, 1H), 3.44 (dd,  $J = 17.2, 8.8$  Hz, 1H), 3.15 (t,  $J = 10.8$  Hz, 1H), 2.87 (dd,  $J = 17.2, 2.4$  Hz, 1H);

$^{13}\text{C NMR}$  (101 MHz,  $\text{CDCl}_3$ )  $\delta$  196.3, 164.2, 157.0, 140.7, 138.4, 137.0, 133.4, 133.1, 133.0, 130.0, 129.3, 129.0, 128.8, 128.5, 128.4, 128.1, 127.6, 125.7, 108.7, 77.5, 53.8, 47.2, 41.7;

HPLC (IF,  $i$ -PrOH/  $n$ -hexane = 85/15), flow rate = 1.0 mL/min,  $t_{\text{R}} = 46.509$  min (major);

HRMS (ESI):  $[\text{M}+\text{H}]^+$  calcd for  $[\text{C}_{32}\text{H}_{25}\text{ClNO}_2\text{S}]^+$ : 522.1289, found: 522.1288.

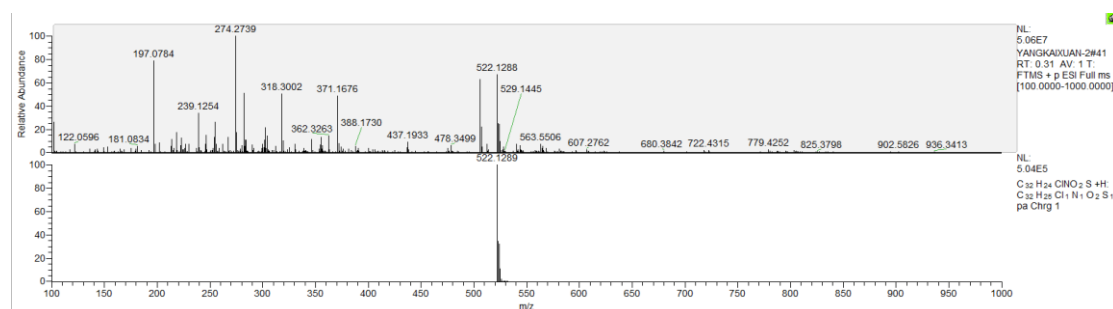

**2-((5R,6R,7R)-7-(4-bromophenyl)-2,6-diphenyl-6,7-dihydro-5H-pyrano[2,3-d]thiazol-5-yl)-1-phenylethan-1-one (3c)**

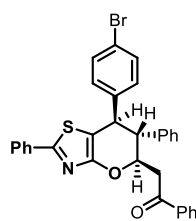

Brown solid (PE/EtOAc/DCM = 10:1:1, 93% isolated yield, 7:1 dr, 52.6 mg);

**m. p.:** 68-70 °C;

$[\alpha]^{22}_{\text{D}} = -16.0$  ( $c = 1.0$ ,  $\text{CH}_2\text{Cl}_2$ , 99% ee);

$^1\text{H NMR}$  (400 MHz,  $\text{CDCl}_3$ )  $\delta$  7.91 – 7.79 (m, 4H), 7.51 (t,  $J = 7.2$  Hz, 1H), 7.46 – 7.33 (m, 5H), 7.28 (d,  $J = 8.0$  Hz, 2H), 7.25 – 7.13 (m, 3H), 7.00 (d,  $J = 6.8$  Hz, 2H), 6.80 (d,  $J = 8.4$  Hz, 2H), 5.36 (ddd,  $J = 10.5, 8.4, 2.4$  Hz, 1H), 4.34 (d,  $J = 10.5$  Hz, 1H), 3.44 (dd,  $J = 17.2, 8.4$  Hz, 1H), 3.14 (t,  $J = 10.5$  Hz, 1H), 2.87 (dd,  $J = 17.2, 2.4$  Hz, 1H);

$^{13}\text{C NMR}$  (101 MHz,  $\text{CDCl}_3$ )  $\delta$  196.2, 164.2, 159.9, 144.4, 138.1, 136.8, 133.3, 133.0, 130.8, 130.4, 130.0, 129.8, 128.9, 128.7, 128.4, 128.0, 127.6, 126.7, 125.6, 122.3, 108.3, 77.4, 53.5, 47.3, 41.5;

**HPLC** (IH, *i*-PrOH/ *n*-hexane = 93/7), flow rate = 1.0 mL/min,  $t_{\text{R}} = 22.8$  min (major);

**HRMS (ESI):**  $[\text{M}+\text{H}]^+$  calcd for  $[\text{C}_{32}\text{H}_{25}\text{BrNO}_2\text{S}]^+$ : 566.0784, 568.0763, found: 566.0786, 568.0766.

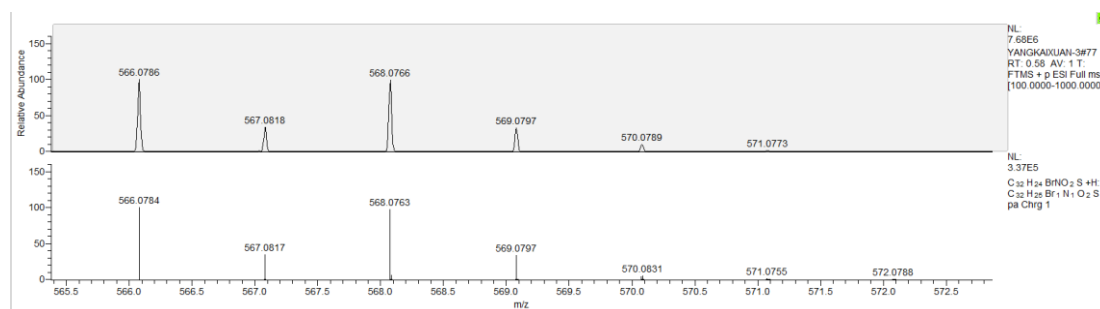

**2-((5R,6R,7R)-7-(4-(tert-butyl)phenyl)-2,6-diphenyl-6,7-dihydro-5H-pyrano[2,3-d]thiazol-5-yl)-1-phenylethan-1-one (3d)**

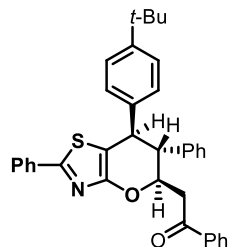

White solid (PE/EtOAc/DCM = 10:1:1, 89% isolated yield, 11:1 dr, 48.5 mg);

**m. p.:** 74-78 °C;

$[\alpha]^{22}_{\text{D}} = -28.0$  ( $c = 1.0$ ,  $\text{CH}_2\text{Cl}_2$ , 99% ee);

$^1\text{H NMR}$  (400 MHz,  $\text{CDCl}_3$ )  $\delta$  7.92 – 7.78 (m, 4H), 7.55 – 7.45 (m, 1H), 7.46 – 7.31 (m, 5H), 7.24 – 7.10 (m, 5H), 7.02 (d,  $J = 6.8$  Hz, 2H), 6.84 (d,  $J = 8.4$  Hz, 2H), 5.35 (ddd,  $J = 10.4, 8.0, 2.8$  Hz, 1H), 4.35 (d,  $J = 10.4$  Hz, 1H), 3.44 (dd,  $J = 17.2, 8.0$  Hz, 1H), 3.19 (t,  $J = 10.4$  Hz, 1H), 2.85 (dd,  $J = 17.2, 2.8$  Hz, 1H), 1.25 (s, 9H);

$^{13}\text{C NMR}$  (101 MHz,  $\text{CDCl}_3$ )  $\delta$  196.5, 163.8, 159.7, 139.0, 139.0, 137.0, 133.6, 133.0, 129.8, 128.8, 128.7, 128.5, 128.4, 128.1, 127.5, 127.4, 125.7, 125.1, 109.8, 77.6, 53.6, 47.1, 41.8, 34.4, 31.3;

**HPLC** (IH, *i*-PrOH/ *n*-hexane/  $\text{NEt}_3$ / DCM = 80/10/5/5), flow rate = 1.0 mL/min,  $t_{\text{R}} = 7.965$  min (major);

**HRMS (ESI):**  $[\text{M}+\text{H}]^+$  calcd for  $[\text{C}_{36}\text{H}_{34}\text{NO}_2\text{S}]^+$ : 544.2305, found: 544.2305.

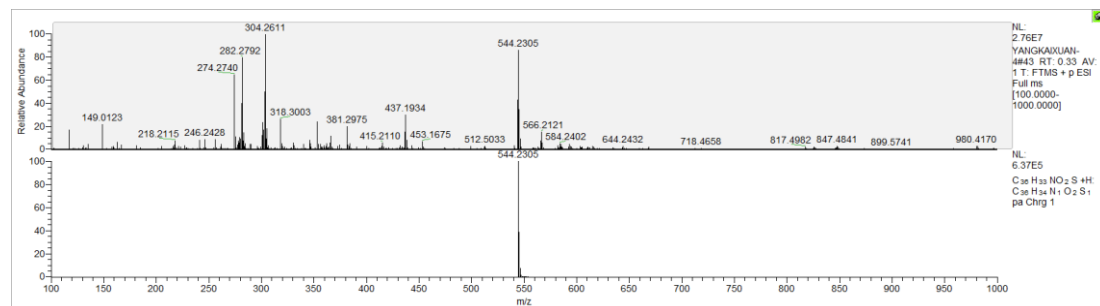



**2-((5R,6R,7R)-7-(4-nitrophenyl)-2,6-diphenyl-6,7-dihydro-5H-pyrano[2,3-d] thiazol-5-yl)-1-phenylethan-1-one (3e)**

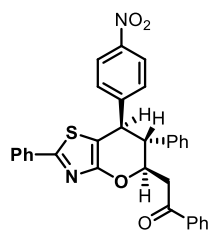

Yellow solid (PE/EtOAc/DCM = 10:1:1, 97% isolated yield, 6:1 dr, 48.6 mg);

**m. p.:** 195-198 °C.

$[\alpha]^{22}_{\text{D}} = -13.0$  ( $c = 1.0$ ,  $\text{CH}_2\text{Cl}_2$ , 92% ee);

$^1\text{H NMR}$  (400 MHz,  $\text{CDCl}_3$ )  $\delta$  8.02 (m, 2H), 7.89 – 7.75 (m, 4H), 7.52 (t,  $J = 7.4$  Hz, 1H), 7.46 – 7.30 (m, 5H), 7.26 – 7.14 (m, 3H), 7.04 (m, 4H), 5.39 (ddd,  $J = 10.8, 8.0, 2.8$  Hz, 1H), 4.50 (d,  $J = 10.4$  Hz, 1H), 3.45 (dd,  $J = 17.2, 8.4$  Hz, 1H), 3.20 (t,  $J = 10.4$  Hz, 1H), 2.90 (dd,  $J = 17.2, 2.8$  Hz, 1H);

$^{13}\text{C NMR}$  (101 MHz,  $\text{CDCl}_3$ )  $\delta$  196.1, 164.6, 160.2, 149.7, 147.1, 137.7, 136.8, 133.2, 133.1, 130.3, 129.2, 128.9, 128.8, 128.4, 128.2, 128.0, 127.9, 125.7, 123.6, 107.2, 77.4, 53.6, 47.6, 41.4.

**HPLC** (IC, *i*-PrOH/ *n*-hexane = 83/17), flow rate = 1.0 mL/min,  $t_{\text{R}} = 8.444$  min (major) $t_{\text{R}} = 12.404$  min (major);

**HRMS (ESI):**  $[\text{M}+\text{H}]^+$  calcd for  $[\text{C}_{33}\text{H}_{25}\text{N}_2\text{O}_4\text{S}]^+$ : 502.1835, found: 502.1833.

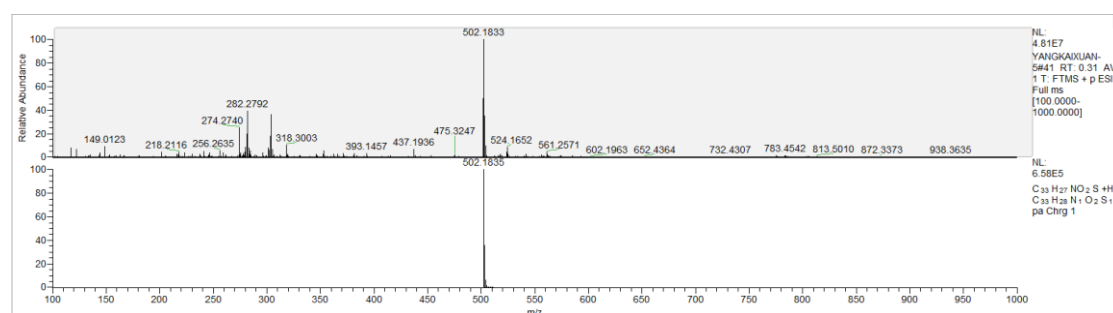

**4-((5R,6R,7R)-5-(2-oxo-2-phenylethyl)-2,6-diphenyl-6,7-dihydro-5H-pyrano[2,3-d]thiazol-7-yl)benzonitrile (3f)**

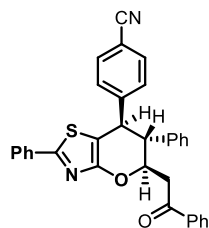

Yellow solid (PE/EtOAc/DCM = 10:1:1, 98% isolated yield, 9:1 dr, 50.3 mg);

**m. p.:** 204-206 °C.

$[\alpha]^{22}_{\text{D}} = -20.0$  ( $c = 1.0$ ,  $\text{CH}_2\text{Cl}_2$ , 98% ee);

$^1\text{H NMR}$  (400 MHz,  $\text{CDCl}_3$ )  $\delta$  7.89 – 7.79 (m, 4H), 7.52 (m, 1H), 7.48 – 7.33 (m, 7H), 7.25 – 7.13 (m, 3H), 7.01 (m, 4H), 5.37 (ddd,  $J = 10.8, 8.0, 2.7$  Hz, 1H), 4.48 – 4.41 (m, 1H), 3.43 (dd,  $J = 17.2, 8.0$  Hz, 1H), 3.17 (t,  $J = 10.8$  Hz, 1H), 2.88 (dd,  $J = 17.2, 2.8$  Hz, 1H);

$^{13}\text{C NMR}$  (101 MHz,  $\text{CDCl}_3$ )  $\delta$  196.1, 164.7, 160.3, 149.7, 147.2, 137.7, 136.8, 133.2, 133.2, 130.3, 129.2, 129.0, 128.9, 128.5, 128.1, 128.0, 125.8, 123.6, 107.2, 77.4, 53.8, 47.7, 41.4, 29.7.

**HPLC** (IC, *i*-PrOH/ *n*-hexane = 83/17), flow rate = 1.0 mL/min,  $t_{\text{R}} = 35.414$  min (major) $t_{\text{R}} = 100.343$  min (major)

**HRMS (ESI):**  $[\text{M}+\text{H}]^+$  calcd for  $[\text{C}_{33}\text{H}_{25}\text{N}_2\text{O}_2\text{S}]^+$ : 513.1631, found: 513.1632.

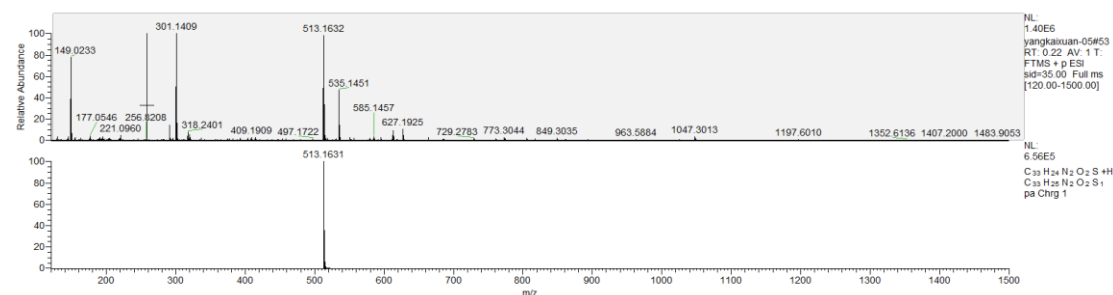

**2-((5R,6R,7R)-2,6-diphenyl-7-(p-tolyl)-6,7-dihydro-5H-pyrano[2,3-d]thiazol-5-yl)-1-phenylethan-1-one (3g)**

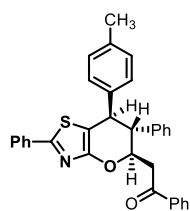

Yellow solid (PE/EtOAc/DCM = 10:1:1, 94% isolated yield, 11:1 dr, 45.6 mg);

**m. p.:** 148-170 °C.

$[\alpha]^{22}_{\text{D}} = -12.0$  ( $c = 1.0$ ,  $\text{CH}_2\text{Cl}_2$ , 99% ee);

**$^1\text{H}$  NMR (400 MHz,  $\text{CDCl}_3$ )**  $\delta$  7.99 – 7.71 (m, 4H), 7.63 – 7.28 (m, 7H), 7.18 (m,  $J = 14.4$ , 6.8 Hz, 3H), 6.99 (dd,  $J = 22.0$ , 7.6 Hz, 4H), 6.82 (d,  $J = 8.0$  Hz, 2H), 5.36 (ddd,  $J = 10.8$ , 8.0, 2.8 Hz, 1H), 4.34 (d,  $J = 10.4$  Hz, 1H), 3.45 (dd,  $J = 17.2$ , 8.8 Hz, 1H), 3.18 (t,  $J = 10.4$  Hz,

1H), 2.85 (dd,  $J = 17.2$ , 2.8 Hz, 1H), 2.26 (s, 3H);

**$^{13}\text{C}$  NMR (101 MHz,  $\text{CDCl}_3$ )**  $\delta$  196.5, 163.9, 159.7, 139.1, 138.9, 137.0, 136.8, 133.5, 133.0, 129.9, 129.0, 128.8, 128.7, 128.4, 128.1, 127.9, 127.4, 125.7, 109.8, 77.6, 53.7, 47.2, 41.8, 21.1;

**HPLC** (OD,  $i$ -PrOH/  $n$ -hexane = 80/20), flow rate = 1.0 mL/min,  $t_{\text{R}} = 12.786$  min (major);

**HRMS (ESI):**  $[\text{M}+\text{H}]^+$  calcd for  $[\text{C}_{33}\text{H}_{28}\text{NO}_2\text{S}]^+$ : 502.1835, found: 502.1833.

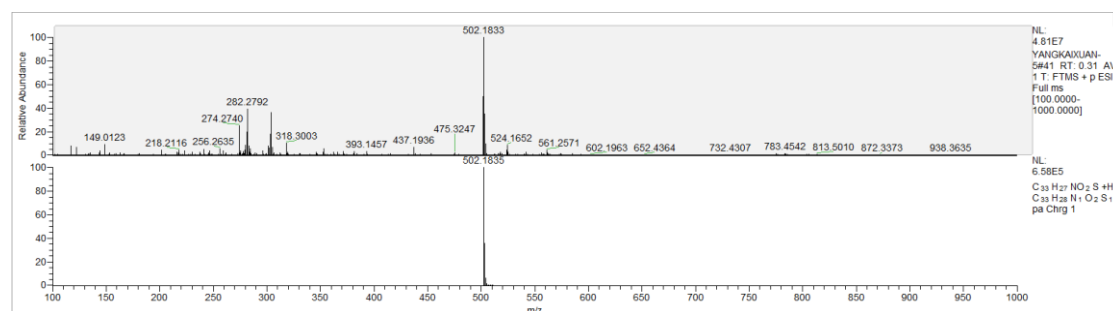

**2-((5R,6R,7R)-2,6-diphenyl-7-(m-tolyl)-6,7-dihydro-5H-pyrano[2,3-d]thiazol-5-yl)-1-phenylethan-1-one (3h)**

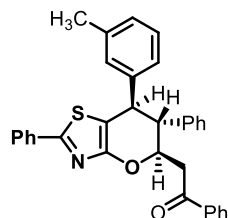

Yellow solid (PE/EtOAc/DCM = 10:1:1, 91% isolated yield, 6:1 dr, 45.8 mg);

**m. p.:** 104-106 °C;

$[\alpha]^{22}_{\text{D}} = -15.0$  ( $c = 1.0$ ,  $\text{CH}_2\text{Cl}_2$ , 99% ee);

**$^1\text{H}$  NMR (400 MHz,  $\text{CDCl}_3$ )**  $\delta$  7.90 – 7.79 (m, 4H), 7.49 (m, 1H), 7.41 – 7.30 (m, 5H), 7.23 – 7.11 (m, 3H), 7.08 – 6.93 (m, 4H), 6.77 – 6.67 (m, 2H), 5.36 (ddd,  $J = 10.8$ , 8.0, 2.8 Hz, 1H), 4.32 (d,  $J = 10.4$  Hz, 1H), 3.45 (dd,  $J = 17.2$ ,

8.4 Hz, 1H), 3.21 (t,  $J = 10.4$  Hz, 1H), 2.87 (dd,  $J = 16.8$ , 2.8 Hz 1H), 2.19 (s, 3H).

**$^{13}\text{C}$  NMR (101 MHz,  $\text{CDCl}_3$ )**  $\delta$  196.5, 163.9, 159.7, 142.1, 138.9, 137.9, 137.0, 133.5, 133.1, 129.9, 128.8, 128.8, 128.7, 128.4, 128.1, 128.1, 128.0, 127.4, 125.7, 125.2, 109.7, 77.6, 53.6, 47.6, 41.8, 21.4;

**HPLC** (IH,  $i$ -PrOH/  $n$ -hexane/DCM = 91/4/5), flow rate = 1.0 mL/min,  $t_{\text{R}} = 65.157$  min (major);

**HRMS (ESI):**  $[\text{M}+\text{H}]^+$  calcd for  $[\text{C}_{33}\text{H}_{28}\text{NO}_2\text{S}]^+$ : 502.1835, found: 502.1833.

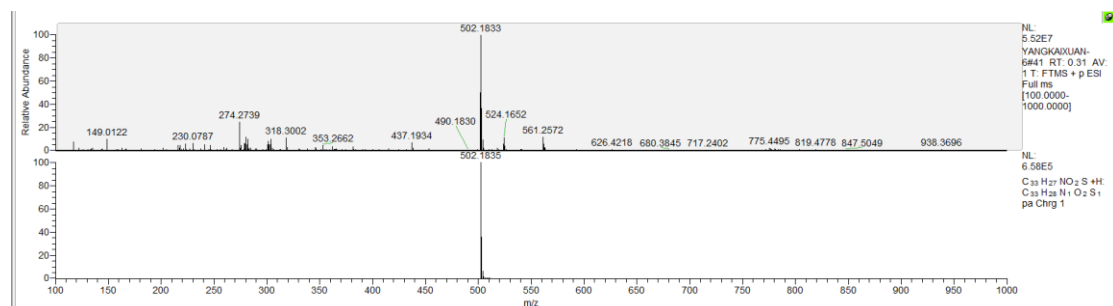

**2-((5R,6R,7R)-7-(3-chlorophenyl)-2,6-diphenyl-6,7-dihydro-5H-pyrano[2,3-d]thiazol-5-yl)-1-phenylethan-1-one (3i)**

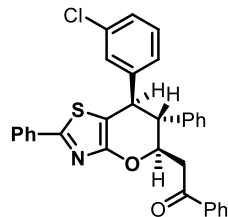

White solid (PE/EtOAc/DCM = 10:1:1, 94% isolated yield, 8:1 dr, 47.8 mg);

**m. p.:** 84-88 °C.

$[\alpha]^{22}_D = -14.0$  ( $c = 1.0$ , CH<sub>2</sub>Cl<sub>2</sub>, 99% ee);

**<sup>1</sup>H NMR (400 MHz, Chloroform-*d*)**  $\delta$  7.98 – 7.75 (m, 4H), 7.55 – 7.46 (m, 1H), 7.46 – 7.31 (m, 5H), 7.26 – 6.88 (m, 8H), 6.78 (d,  $J = 7.6$  Hz, 1H), 5.36 (ddd,  $J = 10.8, 8.0, 2.8$  Hz, 1H), 4.34 (d,  $J = 10.0$  Hz, 1H), 3.45 (dd,  $J = 17.2, 8.4$  Hz, 1H), 3.18 (t,  $J = 10.4$  Hz, 1H), 2.87 (dd,  $J = 17.2, 2.8$  Hz, 1H);

**<sup>13</sup>C NMR (101 MHz, CDCl<sub>3</sub>)**  $\delta$  196.3, 164.3, 159.9, 144.2, 138.2, 136.9, 134.1, 133.3, 133.1, 130.1, 129.5, 129.0, 128.8, 128.5, 128.1, 128.0, 127.1, 127.5, 126.3, 125.7, 108.4, 77.5, 53.6, 47.4, 41.6;

**HPLC** (IH, *i*-PrOH/ *n*-hexane/DCM = 91/4/5), flow rate = 1.0 mL/min,  $t_R = 21.7$  min (major),  $t_R = 35.566$  min (major);

**HRMS (ESI):** [M+H]<sup>+</sup> calcd for [C<sub>32</sub>H<sub>25</sub>ClNO<sub>2</sub>S]<sup>+</sup>: 522.1289, found: 522.1288.

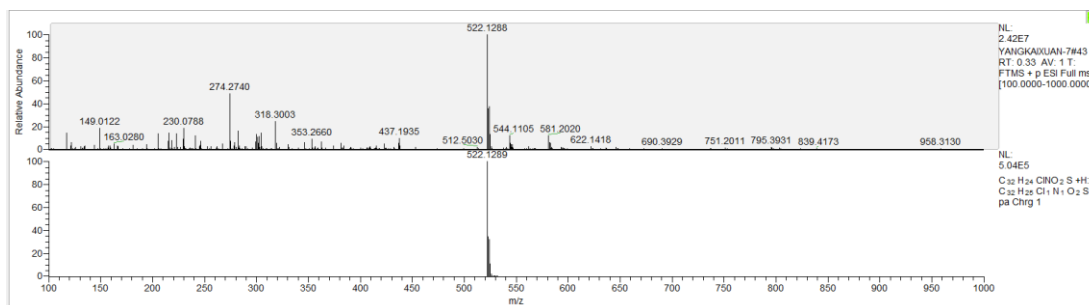

**2-((5R,6R,7R)-7-(3-bromophenyl)-2,6-diphenyl-6,7-dihydro-5H-pyrano[2,3-d]thiazol-5-yl)-1-phenylethan-1-one (3j)**

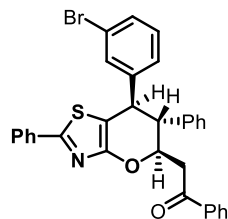

Yellow solid (PE/EtOAc/DCM = 10:1:1, 96% isolated yield, 7:1 dr, 54.4 mg);

**m. p.:** 94-96 °C.

$[\alpha]^{22}_D = -7.0$  ( $c = 1.0$ , CH<sub>2</sub>Cl<sub>2</sub>, 99% ee);

**<sup>1</sup>H NMR (400 MHz, CDCl<sub>3</sub>)**  $\delta$  7.84 (m, 4H), 7.50 (t,  $J = 7.4$  Hz, 1H), 7.38 (m, 4H), 7.33 – 7.14 (m, 4H), 7.12 – 6.94 (m, 4H), 6.82 (d,  $J = 7.7$  Hz, 1H), 5.36 (ddd,  $J = 10.8, 8.0, 2.8$  Hz, 1H), 4.33 (d,  $J = 10.4$  Hz, 1H), 3.45 (dd,  $J = 17.2, 8.0$  Hz, 1H), 3.17 (t,  $J = 10.4$  Hz, 1H), 2.87 (dd,  $J = 17.2, 2.8$  Hz, 1H).

**<sup>13</sup>C NMR (101 MHz, CDCl<sub>3</sub>)**  $\delta$  196.3, 164.3, 159.9, 144.2, 138.2, 136.9, 134.1, 133.3, 133.1, 130.1, 129.5, 129.0, 128.8, 128.4, 128.1, 128.0, 127.7, 127.5, 126.3, 125.7, 108.4, 77.5, 53.6, 47.4, 41.6;

**HPLC** (IH, *i*-PrOH/ *n*-hexane/DCM = 91/4/5), flow rate = 1.0 mL/min,  $t_R = 45.797$  min (major);

**HRMS (ESI):** [M+H]<sup>+</sup> calcd for [C<sub>32</sub>H<sub>25</sub>BrNO<sub>2</sub>S]<sup>+</sup>: 566.0784, 568.0763, found: 566.0782, 568.0764.

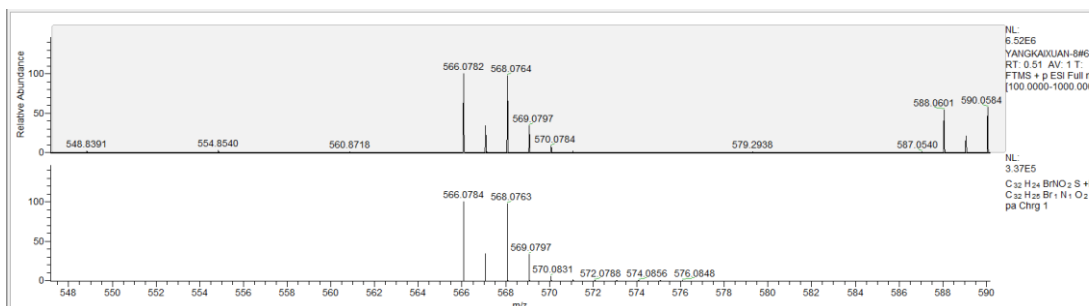

**2-((5R,6R,7R)-7-(2-fluorophenyl)-2,6-diphenyl-6,7-dihydro-5H-pyrano[2,3-d]thiazol-5-yl)-1-phenylethan-1-one (3k)**

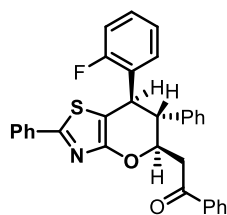

White solid (PE/EtOAc/DCM = 10:1:1, 89% isolated yield, 4:1 dr, 45.1 mg);

**m. p.:** 163-166 °C.

$[\alpha]^{22}_D = -8.0$  ( $c = 1.0$ , CH<sub>2</sub>Cl<sub>2</sub>, 99% ee);

**<sup>1</sup>H NMR (400 MHz, CDCl<sub>3</sub>)**  $\delta$  7.84 (m,  $J = 6.5, 3.5, 2.1$  Hz, 4H), 7.55 – 7.48 (m, 1H), 7.45 – 7.31 (m, 5H), 7.24 – 6.97 (m, 8H), 6.86 (dd,  $J = 14.0, 4.8$  Hz, 1H), 5.40 (ddd,  $J = 10.8, 8.4, 2.8$  Hz, 1H), 4.78 (d,  $J = 10.4$  Hz, 1H), 3.46 (dd,  $J = 17.2, 8.4$  Hz, 1H), 3.33 (t,  $J = 10.4$  Hz, 1H), 2.88 (dd,  $J = 17.2, 2.8$  Hz, 1H);

**<sup>13</sup>C NMR (101 MHz, CDCl<sub>3</sub>)**  $\delta$  196.4, 163.8, 161.8, 159.7, 159.3, 138.3, 137.0, 133.05, 133.1, 129.5, 129.0, 128.90, 128.8 ( $J = 230.0$  Hz), 128.80, 128.8, 128.4, 128.3, 128.1, 127.6, 125.7, 124.3 ( $J = 4$  Hz), 115.5 ( $J = 22$  Hz), 108.5, 77.7, 52.1, 41.7;

**HPLC** (IH, *i*-PrOH/ *n*-hexane/DCM = 91/4/5), flow rate = 1.0 mL/min,  $t_R = 10.956$  min (major),  $t_R = 13.332$  min (major);

**HRMS (ESI):** [M+H]<sup>+</sup> calcd for [C<sub>32</sub>H<sub>25</sub>FNO<sub>2</sub>S]<sup>+</sup>: 506.1585, found: 506.1584.

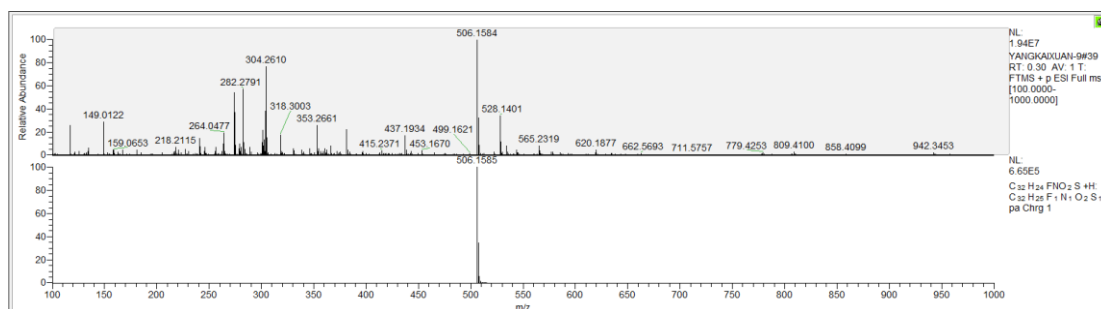

**2-((5R,6R,7R)-7-(2-bromophenyl)-2,6-diphenyl-6,7-dihydro-5H-pyrano[2,3-d]thiazol-5-yl)-1-phenylethan-1-one (3l)**

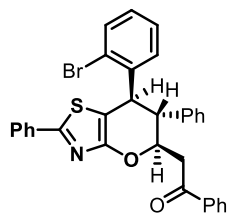

White solid (PE/EtOAc/DCM = 10:1:1, 95% isolated yield, 6:1 dr, 53.9 mg).

**m. p.:** 86-87 °C.

$[\alpha]^{22}_D = -22.0$  ( $c = 1.0$ , CH<sub>2</sub>Cl<sub>2</sub>, 99% ee).

**<sup>1</sup>H NMR (400 MHz, CDCl<sub>3</sub>)**  $\delta$  7.87 – 7.79 (m, 5H), 7.50 (t,  $J = 7.4$  Hz, 1H), 7.36 (m, 7H), 7.29 – 7.23 (m, 2H), 7.17 (t,  $J = 7.6$  Hz, 3H), 7.08 (d,  $J = 6.8$  Hz, 2H), 7.04 – 6.98 (m, 1H), 5.44 (ddd,  $J = 10.4, 8.0, 2.8$  Hz, 1H), 5.14 (d,  $J = 10.4$  Hz, 1H), 3.49 – 3.30 (m, 2H), 2.92 (dd,  $J = 17.2, 2.8$  Hz, 1H).

**<sup>13</sup>C NMR (101 MHz, CDCl<sub>3</sub>)**  $\delta$  196.3, 164.1, 159.4, 141.4, 137.6, 137.0, 133.4, 133.1, 132.7, 129.9, 129.2, 128.7, 128.7, 128.4, 128.1, 127.9, 127.6, 125.6, 124.7, 109.1, 77.7, 52.7, 45.0, 41.6.

**HPLC** (IH, *i*-PrOH/ *n*-hexane/DCM = 91/4/5), flow rate = 1.0 mL/min,  $t_R = 27.693$  min (major).

**HRMS (ESI):** [M+H]<sup>+</sup> calcd for [C<sub>32</sub>H<sub>25</sub>BrNO<sub>2</sub>S]<sup>+</sup>: 566.0784, 568.0763, found: 566.0782, 568.0763.

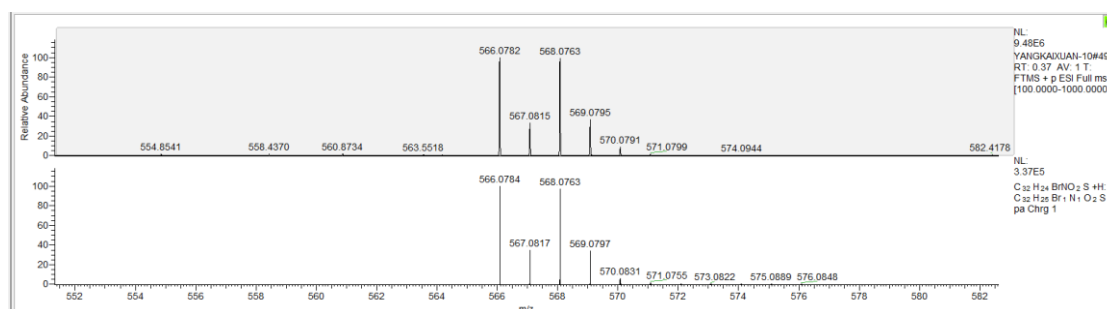

**2-((5R,6R,7R)-2,6-diphenyl-7-(o-tolyl)-6,7-dihydro-5H-pyrano[2,3-d]thiazol-5-yl)-1-phenylethan-1-one (3m)**

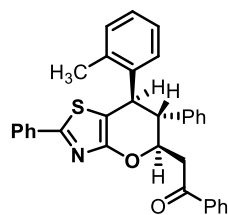

White solid (PE/EtOAc/DCM = 10:1:1, 92% isolated yield, 5:1 dr, 46.1 mg).

**m. p.:** 146-149 °C.

$[\alpha]^{22}_D = -36.0$  ( $c = 1.0$ ,  $\text{CH}_2\text{Cl}_2$ , 99% ee).

**$^1\text{H NMR}$  (400 MHz,  $\text{CDCl}_3$ )**  $\delta$  7.93 – 7.79 (m, 4H), 7.50 (dd,  $J = 10.4, 4.2$  Hz, 1H), 7.38 (t,  $J = 7.6$  Hz, 2H), 7.35 – 7.30 (m, 3H), 7.22 – 7.10 (m, 5H), 7.09 – 6.96 (m, 3H), 6.92 (d,  $J = 7.6$  Hz, 1H), 5.56 – 5.41 (m, 1H), 4.67 (d,  $J = 10.4$  Hz, 1H), 3.49 (dd,  $J =$

17.2, 8.0 Hz, 1H), 3.27 (t,  $J = 10.4$  Hz, 1H), 2.89 (dd,  $J = 17.2, 2.4$  Hz, 1H), 1.81 (s, 3H).

**$^{13}\text{C NMR}$  (101 MHz,  $\text{CDCl}_3$ )**  $\delta$  196.5, 163.7, 159.6, 140.7, 138.8, 136.9, 136.0, 133.4, 133.0, 129.9, 129.8, 128.7, 128.7, 128.4, 128.1, 127.6, 127.4, 126.8, 126.4, 125.5, 110.3, 77.3, 53.4, 42.2, 41.7, 19.1.

**HPLC** (IH,  $i$ -PrOH/  $n$ -hexane = 95/5), flow rate = 1.0 mL/min,  $t_R = 32.404$  min (major).

**HRMS (ESI):**  $[\text{M}+\text{H}]^+$  calcd for  $[\text{C}_{33}\text{H}_{28}\text{NO}_2\text{S}]^+$ : 502.1835, found: 502.1835.

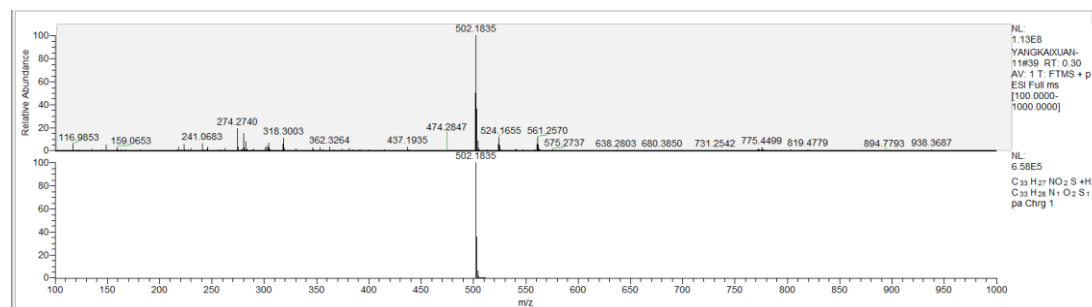

**2-((5R,6R,7R)-7-(2-methoxyphenyl)-2,6-diphenyl-6,7-dihydro-5H-pyrano[2,3-d]thiazol-5-yl)-1-phenylethan-1-one (3n)**

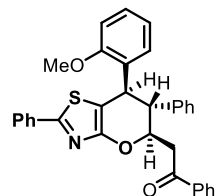

White solid (PE/EtOAc/DCM = 10:1:1, 97% isolated yield, 8:1 dr, 50.2 mg).

**m. p.:** 68-70 °C.

$[\alpha]^{22}_D = -18.0$  ( $c = 1.0$ ,  $\text{CH}_2\text{Cl}_2$ , 99% ee).

**$^1\text{H NMR}$  (400 MHz,  $\text{CDCl}_3$ )**  $\delta$  7.55 – 7.48 (m, 1H), 7.44 – 7.31 (m, 5H), 7.20 – 7.11 (m, 4H), 7.06 (m, 2H), 6.85 (t,  $J = 7.2$  Hz, 1H), 6.68 (d,  $J = 8.2$  Hz, 1H), 5.39 (ddd,  $J = 10.8, 8.4, 2.7$  Hz, 1H), 3.52 – 3.38 (m, 4H), 3.32 (s, 1H), 2.87 (dd,  $J = 17.2, 2.4$  Hz, 1H).

**$^{13}\text{C NMR}$  (101 MHz,  $\text{CDCl}_3$ )**  $\delta$  196.6, 157.1, 139.1, 137.1, 133.7, 130.0, 129.7, 128.7, 128.6, 128.4, 128.3, 128.1, 127.2, 125.6, 120.7, 110.8, 109.9, 77.7, 55.2, 42.0.

**HPLC** (AD,  $i$ -PrOH/  $n$ -hexane = 80/20), flow rate = 1.0 mL/min,  $t_R = 38.57$  min (major).

**HRMS (ESI):**  $[\text{M}+\text{H}]^+$  calcd for  $[\text{C}_{33}\text{H}_{28}\text{NO}_3\text{S}]^+$ : 518.1784, found: 518.1785.

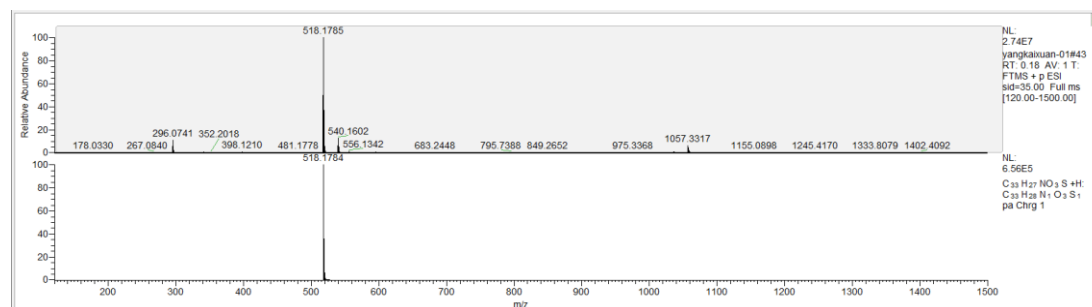

**2-((5R,6R,7R)-7-(furan-2-yl)-2,6-diphenyl-6,7-dihydro-5H-pyrano[2,3-d]thiazol-5-yl)-1-phenylethan-1-one (3o)**

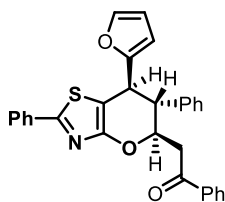

White solid (PE/EtOAc/DCM = 10:1:1, 90% isolated yeild, 15:1 dr, 43.2 mg).

**m. p.:** 97-101 °C.

$[\alpha]^{22}_D = -3.0$  ( $c = 1.0$ ,  $\text{CH}_2\text{Cl}_2$ , 98% ee).

**$^1\text{H}$  NMR (400 MHz,  $\text{CDCl}_3$ )**  $\delta$  7.91 – 7.78 (m, 4H), 7.52 (m, 1H), 7.44 – 7.33 (m, 5H), 7.28 – 7.09 (m, 6H), 6.19 (dd,  $J = 3.2, 1.9$  Hz, 1H), 5.97 (d,  $J = 3.2$  Hz, 1H), 5.34 (ddd,  $J = 10.8, 8.0, 2.8$  Hz, 1H), 4.56 (d,  $J = 10.4$  Hz, 1H), 3.53 – 3.43 (m, 2H), 2.87 (dd,  $J = 16.8, 2.8$  Hz, 1H).

**$^{13}\text{C}$  NMR (101 MHz,  $\text{CDCl}_3$ )**  $\delta$  196.3, 164.0, 159.1, 153.7, 141.9, 138.9, 136.9, 133.5, 133.1, 129.9, 129.0, 128.7, 128.4, 128.2, 128.1, 127.6, 125.7, 110.1, 107.2, 106.5, 77.4, 49.6, 41.7, 41.0.

**HPLC** (IH, *i*-PrOH/ *n*-hexane = 93/7), flow rate = 1.0 mL/min,  $t_R = 27.002$  min (major),  $t_R = 32.938$  min (major);

**HRMS (ESI):**  $[\text{M}+\text{H}]^+$  calcdfor  $[\text{C}_{30}\text{H}_{24}\text{NO}_3\text{S}]^+$ : 478.1471, found: 478.1471.

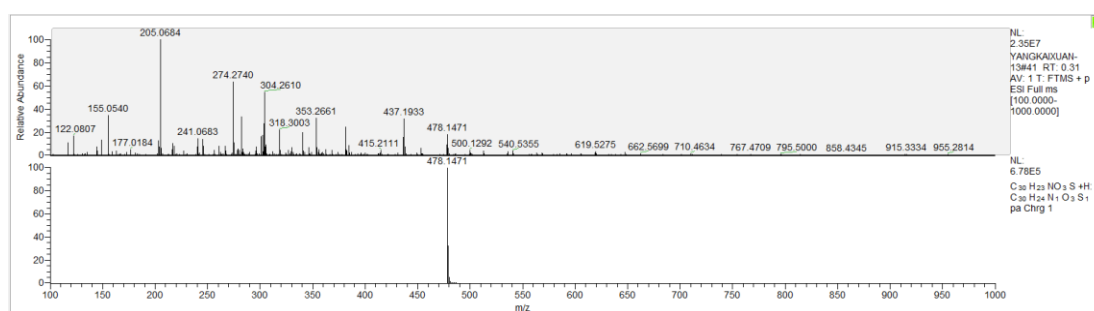

**2-((5R,6R,7R)-2-(4-chlorophenyl)-6,7-diphenyl-6,7-dihydro-5H-pyrano[2,3-d]thiazol-5-yl)-1-phenylethan-1-one (3p)**

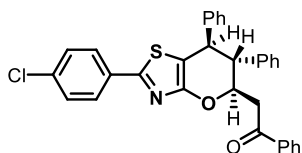

White solid (PE/EtOAc/DCM = 10:1:1, 89% isolated yeild, 6:1 dr, 46.6 mg).

**m. p.:** 106-108 °C.

$[\alpha]^{22}_D = -10.0$  ( $c = 0.1$ ,  $\text{CH}_2\text{Cl}_2$ , 99% ee).

**$^1\text{H}$  NMR (400 MHz,  $\text{CDCl}_3$ )**  $\delta$  7.87 – 7.74 (m, 4H), 7.52 (m,  $J = 10.4, 4.4$  Hz, 1H), 7.41 (t,  $J = 7.6$  Hz, 2H), 7.37 – 7.29 (m, 2H), 7.23 – 7.13 (m, 6H), 7.08 – 6.88 (m, 4H), 5.37 (ddd,  $J = 10.8, 8.0, 2.4$  Hz, 1H), 4.37 (d,  $J = 10.4$  Hz, 1H), 3.45 (dd,  $J = 17.2, 8.4$  Hz, 1H), 3.20 (t,  $J = 10.4$  Hz, 1H), 2.86 (dd,  $J = 17.2, 2.8$  Hz, 1H).

**$^{13}\text{C}$  NMR (101 MHz,  $\text{CDCl}_3$ )**  $\delta$  196.4, 162.6, 159.9, 142.0, 138.6, 137.0, 135.8, 133.1, 132.0, 129.0, 128.9, 128.6, 128.4, 128.3, 128.1, 128.0, 127.5, 127.4, 126.9, 110.0, 77.7, 53.7, 47.7, 41.8.

**HPLC** (IF *i*-PrOH/ *n*-hexane = 90/10), flow rate = 1.0 mL/min,  $t_R = 50.743$  min (major).

**HRMS (ESI):**  $[\text{M}+\text{H}]^+$  calcdfor  $[\text{C}_{32}\text{H}_{25}\text{ClNO}_2\text{S}]^+$ : 522.1289, found: 522.1291

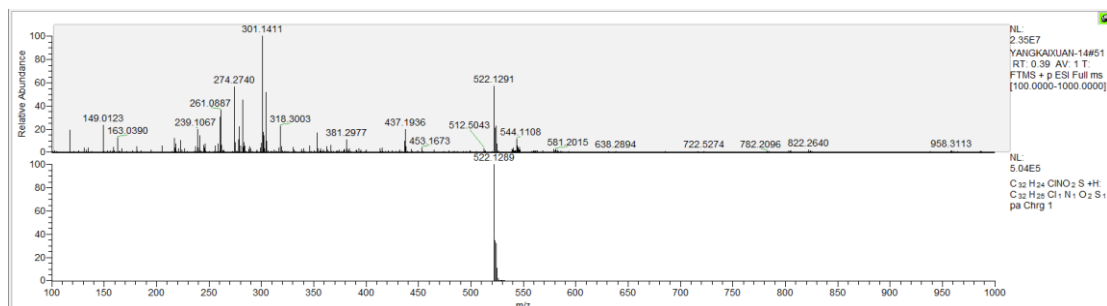

**2-((5R,6R,7R)-2-(4-methoxyphenyl)-6,7-diphenyl-6,7-dihydro-5H-pyrano[2,3-d]thiazol-5-yl)-1-phenylethan-1-one (3q)**

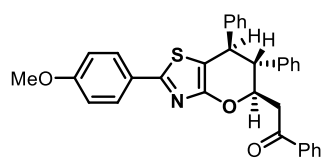

White solid (PE/EtOAc/DCM = 10:1:1, 93% isolated yeild, 5:1 dr, 48 mg).

**m. p.:** 98-101 °C.

$[\alpha]^{22}_D = -14.0$  ( $c = 1.0$ ,  $\text{CH}_2\text{Cl}_2$ , 97% ee).

**$^1\text{H NMR}$  (400 MHz,  $\text{CDCl}_3$ )**  $\delta$  7.87 – 7.77 (m, 4H), 7.50 (m, 1H), 7.38 (m, 2H), 7.24 – 7.11 (m, 6H), 6.97 (m, 6H), 5.37 (ddd,  $J = 10.8, 8.4, 2.4$  Hz, 1H), 4.35 (d,  $J = 10.4$  Hz, 1H), 3.45 (dd,  $J = 17.2, 8.4$  Hz, 1H), 3.20 (t,  $J = 10.8$  Hz, 1H), 2.87 (dd,  $J = 17.2, 2.8$  Hz, 1H).  
 **$^{13}\text{C NMR}$  (101 MHz,  $\text{CDCl}_3$ )**  $\delta$  196.3, 165.0, 162.7, 162.5, 159.7, 142.0, 138.6, 136.9, 133.0, 129.8, 129.8, 128.8, 128.4, 128.3, 128.0, 127.9, 127.6, 127.5, 127.4, 127.3, 115.9, 115.7, 109.4, 77.5, 53.6, 47.6, 41.7.

**HPLC** (Ih *i*-PrOH/ *n*-hexane = 90/10), flow rate = 1.0 mL/min,  $t_R = 40.042$  min (minor),  $t_R = 47.171$  min (major)).

**HRMS (ESI):**  $[\text{M}+\text{H}]^+$  calcdfor  $[\text{C}_{33}\text{H}_{28}\text{NO}_3\text{S}]^+$ : 518.1784, found: 518.1786

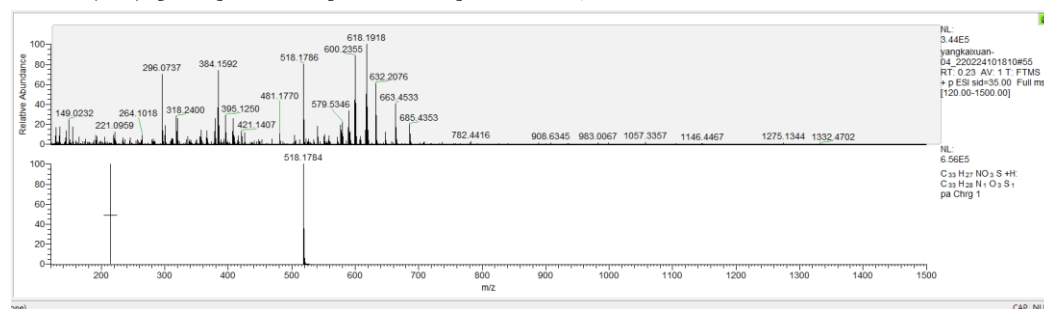

**2-((5R,6R,7R)-2-(4-fluorophenyl)-6,7-diphenyl-6,7-dihydro-5H-pyrano[2,3-d]thiazol-5-yl)-1-phenylethan-1-one (3r)**

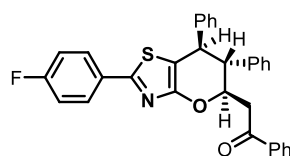

White solid (PE/EtOAc/DCM = 10:1:1, 96 % isolated yeild, 6:1 dr, 48.6 mg).

**m. p.:** 96-98 °C.

$[\alpha]^{22}_D = -14.0$  ( $c = 1.0$ ,  $\text{CH}_2\text{Cl}_2$ , 97% ee).

**$^1\text{H NMR}$  (400 MHz,  $\text{CDCl}_3$ )**  $\delta$  7.87 – 7.77 (m, 4H), 7.50 (t,  $J = 7.2$  Hz, 1H), 7.38 (t,  $J = 7.6$  Hz, 2H), 7.24 – 7.11 (m, 6H), 6.97 (m, 6H), 5.37 (ddd,  $J = 10.8, 8.0, 2.8$  Hz, 1H), 4.35 (d,  $J = 10.4$  Hz, 1H), 3.45 (dd,  $J = 16.8, 8.0$  Hz, 1H), 3.20 (t,  $J = 10.4$  Hz, 1H), 2.87 (dd,  $J = 17.2, 2.8$  Hz, 1H).

**$^{13}\text{C NMR}$  (101 MHz,  $\text{CDCl}_3$ )**  $\delta$  196.3, 165.0, 162.6 ( $J = 10.3$  Hz), 159.7, 142.0, 138.6, 136.9, 133.0, 129.8 ( $J = 1.2$  Hz), 128.8, 128.4, 128.3, 128.1, 127.9, 127.6, 127.5, 127.4, 127.3, 115.8 ( $J = 22$  Hz), 109.4, 77.5, 53.6, 47.6, 41.7.

**HPLC** (Ih *i*-PrOH/ *n*-hexane = 90/10), flow rate = 1.0 mL/min,  $t_R = 28.185$  min (minor),  $t_R = 45.243$  min (major)).

**HRMS (ESI):**  $[\text{M}+\text{H}]^+$  calcdfor  $[\text{C}_{32}\text{H}_{25}\text{FNO}_2\text{S}]^+$ : 506.1585, found: 506.1583

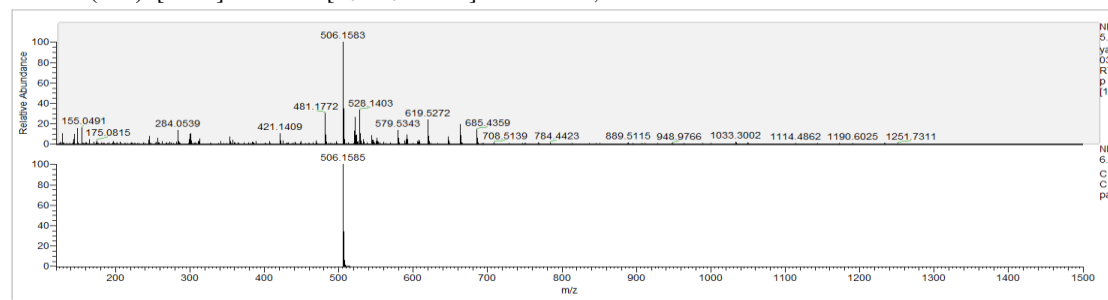

**2-((5R,6R,7R)-2-(3-chlorophenyl)-6,7-diphenyl-6,7-dihydro-5H-pyrano[2,3-d]thiazol-5-yl)-1-phenylethan-1-one (3s)**

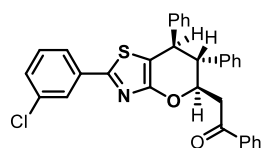

White solid (PE/EtOAc/DCM = 10:1:1, 94% isolated yeild, 6:1 dr, 48.6 mg).

**m. p.:** 96-98 °C.

$[\alpha]^{22}_{\text{D}} = -10.0$  ( $c = 1.0$ ,  $\text{CH}_2\text{Cl}_2$ , 89% ee).

**$^1\text{H NMR}$  (400 MHz,  $\text{CDCl}_3$ )**  $\delta$  7.90 – 7.81 (m, 3H), 7.70 (m, 1H), 7.52 (m, 1H), 7.40 (m, 2H), 7.35 – 7.24 (m, 3H), 7.22 – 7.11 (m, 6H), 7.01 (d,  $J = 6.8$  Hz, 2H), 6.94 (m, 2H), 5.38 (ddd,  $J = 10.8$ , 8.4, 2.8 Hz, 1H), 4.38 (d,  $J = 8.0$  Hz, 1H), 3.50 – 3.41 (dd,  $J = 17.2$  Hz, 8.4 Hz 1H), 3.21 (t,  $J = 10.4$  Hz, 1H), 2.86 (dd,  $J = 17.2$ , 2.8 Hz, 1H).

**$^{13}\text{C NMR}$  (101 MHz,  $\text{CDCl}_3$ )**  $\delta$  196.4, 162.2, 159.9, 141.9, 138.6, 136.9, 135.1, 134.9, 133.1, 130.0, 129.8, 128.9, 128.4, 128.4, 128.1, 128.0, 127.5, 127.4, 125.7, 123.7, 110.4, 77.6, 77.3, , 53.6, 47.7, 41.7.

**HPLC** (IF *i*-PrOH/ *n*-hexane = 90/10), flow rate = 1.0 mL/min),  $t_{\text{R}} = 20.39$  min (minor),  $t_{\text{R}} = 30.23$  min (major)).

**HRMS (ESI):**  $[\text{M}+\text{H}]^+$  calcdfor  $[\text{C}_{32}\text{H}_{25}\text{ClNO}_2\text{S}]^+$ : 522.1289, found: 522.1291

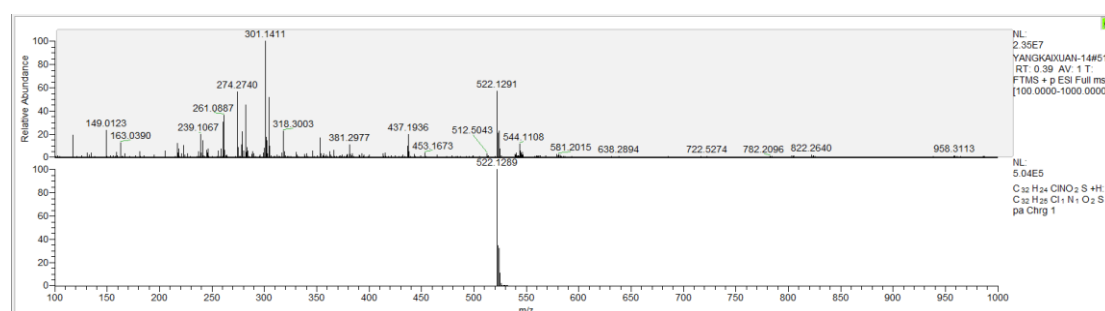

**2-((5R,6R,7R)-7-(3,4-difluorophenyl)-2,6-diphenyl-6,7-dihydro-5H-pyrano[2,3-d]thiazol-5-yl)-1-phenylethan-1-one (3t)**

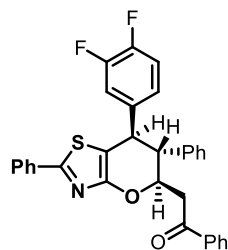

Yellow solid (PE/EtOAc/DCM = 10:1:1, 96% isolated yeild, 8:1 dr, 50.2 mg).

**m. p.:** 72-74 °C.

$[\alpha]^{22}_{\text{D}} = -16.0$  ( $c = 1.0$ ,  $\text{CH}_2\text{Cl}_2$ , 99% ee).

**$^1\text{H NMR}$  (400 MHz,  $\text{CDCl}_3$ )**  $\delta$  7.50 (m, 1H), 7.43 – 7.30 (m, 5H), 7.25 – 7.14 (m, 3H), 7.06 (m, 3H), 6.75 (m, 1H), 6.64 – 6.54 (m, 1H), 5.39 (ddd,  $J = 10.4$ , 8.4, 2.4 Hz, 1H), 4.72 (d,  $J = 10.4$  Hz, 1H), 3.45 (dd,  $J = 17.2$ , 8.4 Hz, 1H), 3.28 (t,  $J = 10.4$  Hz, 1H), 2.88 (dd,  $J = 16.8$ , 2.4 Hz, 1H).

**$^{13}\text{C NMR}$  (101 MHz,  $\text{CDCl}_3$ )**  $\delta$  196.2, 164.7, 163.9, 163.1 ( $J = 48$  Hz), 161.7 ( $J = 48$  Hz), 160.6 ( $J = 48$  Hz), 159.8, 159.2 ( $J = 48$  Hz), 153.4, 138.0, 136.9, 133.0, 130.3, 130.0, 128.9, 128.8, 128.4, 128.3, 128.1, 127.7, 125.6, 124.9 ( $J = 12$  Hz), 124.7 ( $J = 12$  Hz), 111.7 ( $J = 16$  Hz), 111.5 ( $J = 16$  Hz), 108.0, 103.7 ( $J = 104$  Hz), 77.6, 52.1, 41.6.

**HPLC** (IH, *i*-PrOH/ *n*-hexane/DCM = 91/4/5), flow rate = 1.0 mL/min),  $t_{\text{R}} = 45.533$  min (major).

**HRMS (ESI):**  $[\text{M}+\text{H}]^+$  calcdfor  $[\text{C}_{32}\text{H}_{24}\text{F}_2\text{NO}_2\text{S}]^+$ : 524.1490, found: 524.1492

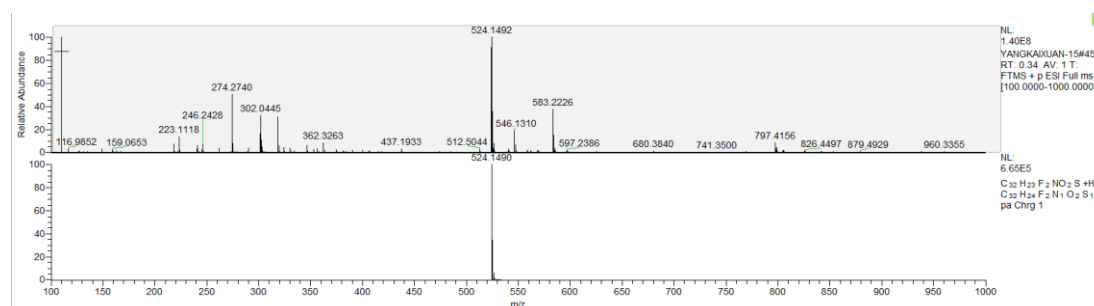



**2-((5R,6R,7R)-2,7-diphenyl-6-(p-tolyl)-6,7-dihydro-5H-pyrano[2,3-d]thiazol-5-yl)-1-phenylethan-1-one**

**(4a)**

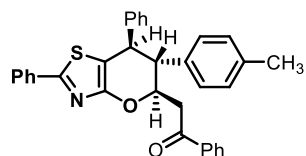

Brown solid (PE/EtOAc/DCM = 10:1:1, 98% isolated yeild, 7:1 dr, 49.3 mg).

**m. p.:** 96-98 °C.

$[\alpha]^{22}_{\text{D}} = -27.0$  ( $c = 1.0$ ,  $\text{CH}_2\text{Cl}_2$ , 99% ee).

**$^1\text{H NMR}$  (400 MHz,  $\text{CDCl}_3$ )**  $\delta$  7.83 (m,  $J = 6.8, 2.8$  Hz, 4H), 7.54 – 7.46 (m, 1H), 7.43 – 7.28 (m, 5H), 7.17 (dd,  $J = 6.8, 3.6$  Hz, 3H), 7.05 – 6.81 (m, 6H), 5.34 (m,  $J = 10.4, 8.0, 2.4$  Hz, 1H), 4.35 (d,  $J = 10.0$  Hz, 1H), 3.43 (dd,  $J = 16.8, 8.0$  Hz, 1H), 3.16 (t,  $J = 10.4$  Hz, 1H), 2.88 (dd,  $J = 16.8, 2.4$  Hz, 1H), 2.23 (s, 3H)..

**$^{13}\text{C NMR}$  (101 MHz,  $\text{CDCl}_3$ )**  $\delta$  196.6, 164.0, 159.9, 142.3, 137.1, 137.1, 135.6, 133.6, 133.0, 129.9, 129.6, 128.8, 128.4, 128.3, 128.2, 128.1, 127.3, 125.7, 109.6, 77.8, 53.4, 47.7, 41.9, 21.1.

**HPLC** (If, *i*-PrOH/ *n*-hexane= 83/17), flow rate = 1.0 mL/min,  $t_{\text{R}} = 33.799$  min (major).

**HRMS (ESI):**  $[\text{M}+\text{H}]^+$  calcdfor  $[\text{C}_{33}\text{H}_{28}\text{NO}_2\text{S}]^+$ : 502.1835, found: 502.1832

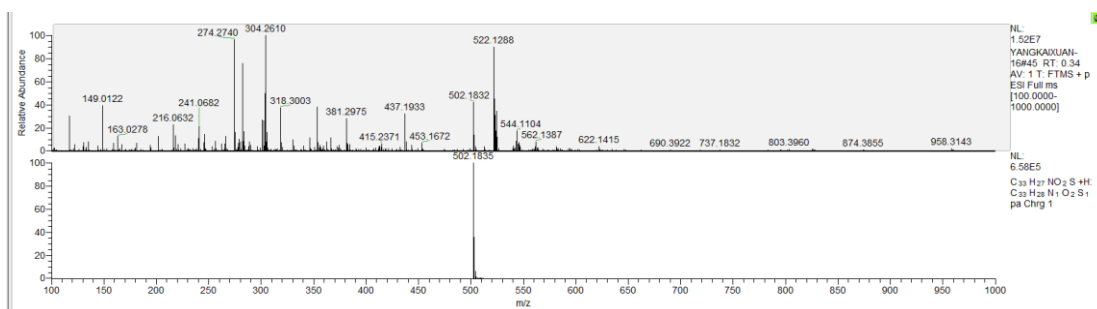

**2-((5R,6R,7R)-6-(4-chlorophenyl)-2,7-diphenyl-6,7-dihydro-5H-pyrano[2,3-d]thiazol-5-yl)-1-phenylethan-1-one (4b)**

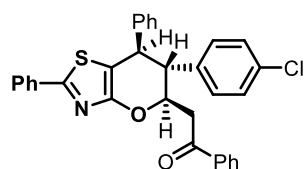

Yellow liquid (PE/EtOAc/DCM = 10:1:1, 96% isolated yeild, 10:1 dr, 50.0 mg).

$[\alpha]^{22}_{\text{D}} = -16.0$  ( $c = 1.0$ ,  $\text{CH}_2\text{Cl}_2$ , 99% ee).

**$^1\text{H NMR}$  (400 MHz,  $\text{CDCl}_3$ )**  $\delta$  7.83 (td,  $J = 6.9, 2.6$  Hz, 4H), 7.54 – 7.46 (m, 1H), 7.43 – 7.28 (m, 5H), 7.17 (dd,  $J = 6.6, 3.6$  Hz, 3H), 7.05 – 6.81 (m, 6H), 5.34 (ddd,  $J = 10.7, 8.2, 2.7$  Hz, 1H), 4.35 (d,  $J = 10.3$  Hz, 1H), 3.43 (dd,  $J = 17.0, 8.2$  Hz, 1H), 3.16 (t,  $J = 10.5$  Hz, 1H), 2.88 (dd,  $J = 16.9, 2.5$  Hz, 1H), 2.23 (s, 3H).

**$^{13}\text{C NMR}$  (101 MHz,  $\text{CDCl}_3$ )**  $\delta$  196.3, 164.1, 159.9, 140.7, 138.3, 136.9, 133.3, 133.0, 133.0, 130.0, 129.3, 129.0, 128.8, 128.5, 128.4, 128.1, 127.6, 125.7, 108.7, 77.5, 53.7, 47.1, 41.6.

**HPLC** (IH, *i*-PrOH/ *n*-hexane = 90/10), flow rate = 1.0 mL/min,  $t_{\text{R}} = 17.337$  min (major).

**HRMS (ESI):**  $[\text{M}+\text{H}]^+$  calcdfor  $[\text{C}_{33}\text{H}_{28}\text{ClNO}_2\text{S}]^+$ : 522.1289, found: 522.1290

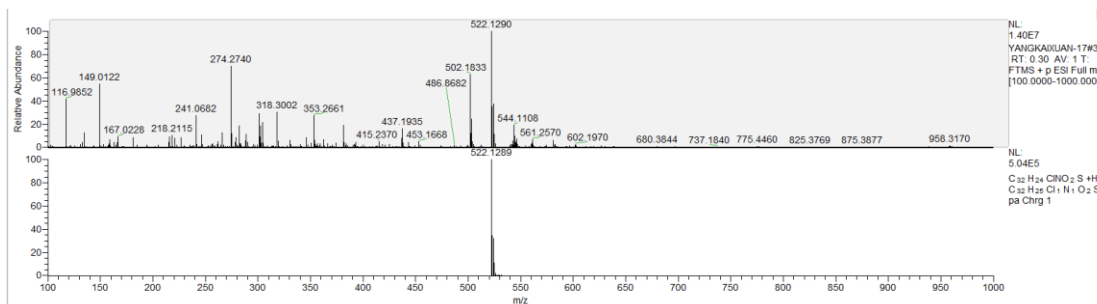

**2-((5R,6R,7R)-2,7-diphenyl-6-(m-tolyl)-6,7-dihydro-5H-pyrano[2,3-d]thiazol-5-yl)-1-phenylethan-1-one (4c)**

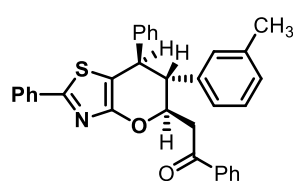

White solid (PE/EtOAc/DCM = 10:1:1, 93% isolated yeild, 7:1 dr, 46.8 mg).

**m. p.:** 77-80 °C.

$[\alpha]^{22}_D = -26.0$  ( $c = 1.0$ ,  $\text{CH}_2\text{Cl}_2$ , 94% ee).

**$^1\text{H NMR}$  (400 MHz,  $\text{CDCl}_3$ )**  $\delta$  7.85 (d,  $J = 7.1$  Hz, 4H), 7.59 – 7.47 (m, 1H), 7.47 – 7.29 (m, 6H), 7.26 – 7.12 (m, 4H), 7.04 – 6.71 (m, 4H), 5.41 – 5.29 (m, 1H), 4.30

(d,  $J = 10.2$  Hz, 1H), 3.57 – 3.32 (m, 2H), 2.99 (dd,  $J = 17.0$ , 1.9 Hz, 1H).

**$^{13}\text{C NMR}$  (101 MHz,  $\text{CDCl}_3$ )**  $\delta$  196.4, 163.9, 159.8, 142.2, 138.6, 138.4, 137.0, 133.5, 133.0, 129.8, 128.9, 128.7, 128.6, 128.3, 128.2, 128.2, 128.1, 128.0, 127.2, 125.6, 109.5, 77.6, 53.6, 47.5, 41.8, 21.3.

**HPLC** (If, *i*-PrOH/ *n*-hexane = 83/17), flow rate = 1.0 mL/min,  $t_R = 31.33$  min (major),  $t_R = 38.60$  min (major).

**HRMS (ESI):**  $[\text{M}+\text{H}]^+$  calcdfor  $[\text{C}_{33}\text{H}_{28}\text{NO}_2\text{S}]^+$ : 502.1835, found: 502.1833

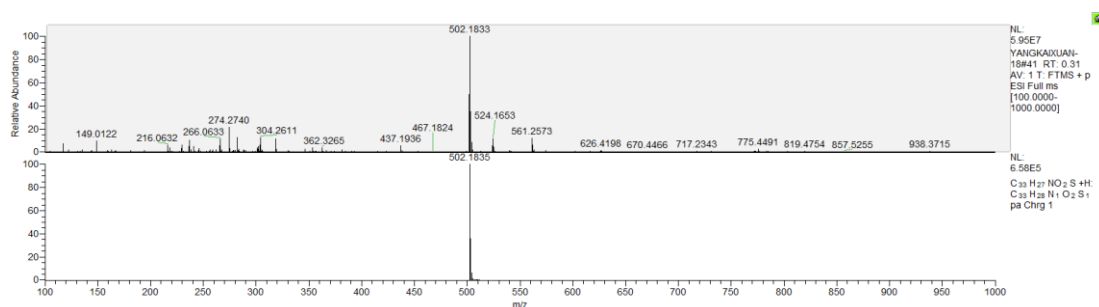

**2-((5R,6R,7R)-6-(2-methoxyphenyl)-2,7-diphenyl-6,7-dihydro-5H-pyrano[2,3-d]thiazol-5-yl)-1-phenylethan-1-one (4d)**

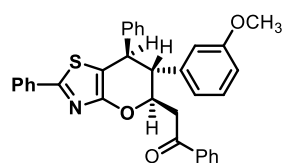

Yellow solid (PE/EtOAc/DCM = 10:1:1, 92% isolated yeild, 7:1 dr, 47.8 mg).

**m. p.:** 90-92 °C.

$[\alpha]^{22}_D = -34.0$  ( $c = 1.0$ ,  $\text{CH}_2\text{Cl}_2$ , 99% ee).

**$^1\text{H NMR}$  (400 MHz,  $\text{CDCl}_3$ )**  $\delta$  7.91 – 7.79 (m, 2H), 7.36 (m,  $J = 6.7$ , 3.6 Hz, 3H), 7.20 – 7.10 (m, 3H), 7.03 (d,  $J = 7.8$  Hz, 2H), 6.98 – 6.79 (m, 4H), 5.00 (ddd,  $J = 11.4$ , 8.3, 3.3 Hz, 1H), 4.35 – 4.25 (m, 1H), 3.62 (s, 3H), 3.07 (t,  $J = 10.5$  Hz, 1H), 2.61 (dd,  $J = 16.2$ , 8.3 Hz, 1H), 2.46 (dd,  $J = 16.2$ , 3.3 Hz, 1H), 2.27 (s, 3H).

**$^{13}\text{C NMR}$  (101 MHz,  $\text{CDCl}_3$ )**  $\delta$  196.4, 163.9, 159.8, 159.7, 142.1, 140.2, 137.0, 133.5, 133.0, 129.9, 129.9, 128.7, 128.4, 128.3, 128.1, 128.0, 127.3, 125.6, 120.6, 114.3, 112.6, 109.4, 77.5, 55.1, 53.7, 47.6, 41.7.

**HPLC** (AD, *i*-PrOH/ *n*-hexane = 80/20), flow rate = 1.0 mL/min,  $t_R = 36.81$  min (major).

**HRMS (ESI):**  $[\text{M}+\text{H}]^+$  calcdfor  $[\text{C}_{33}\text{H}_{28}\text{NO}_3\text{S}]^+$ : 518.1784, found: 518.1784

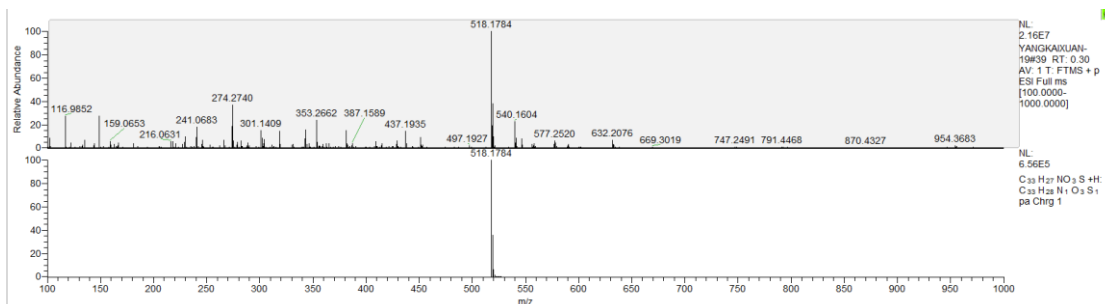

**1-(2-methoxyphenyl)-2-((5R,6R,7R)-2,6,7-triphenyl-6,7-dihydro-5H-pyrano[2,3-d]thiazol-5-yl)ethan-1-one (4e)**

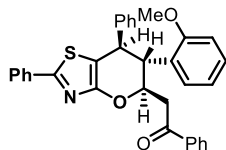

White solid (PE/EtOAc/DCM = 10:1:1, 96% isolated yield, 7:1 dr, 49.7 mg).

**m. p.:** 73-74 °C.

$[\alpha]^{22}_D = -5.0$  ( $c = 1.0$ , CH<sub>2</sub>Cl<sub>2</sub>, 99% ee).

**<sup>1</sup>H NMR (400 MHz, CDCl<sub>3</sub>)** δ 7.92 – 7.78 (m, 4H), 7.50 (m,  $J = 7.2$  Hz, 1H), 7.43 – 7.30 (m, 5H), 7.23 – 7.00 (m, 7H), 6.84 (m,  $J = 7.2$  Hz, 1H), 6.68 (d,  $J = 8.2$  Hz, 1H),

5.39 (ddd,  $J = 10.8, 8.4, 2.8$  Hz, 1H), 4.94 (s, 1H), 3.52 – 3.21 (m, 5H), 2.87 (dd,  $J = 16.8, 2.8$  Hz, 1H).

**<sup>13</sup>C NMR (101 MHz, CDCl<sub>3</sub>)** δ 196.7, 163.7, 157.5, 137.1, 133.6, 132.9, 129.8, 128.7, 128.5, 128.3, 128.2, 128.1, 128.0, 127.0, 125.7, 121.0, 111.2, 109.6, 55.4, 42.0, 29.7.

**HPLC** (IH, *i*-PrOH/ *n*-hexane/DCM = 91/4/5), flow rate = 1.0 mL/min,  $t_R = 28.757$  min (major)

**HRMS (ESI):** [M+H]<sup>+</sup> calcd for [C<sub>33</sub>H<sub>28</sub>NO<sub>3</sub>S]<sup>+</sup>: 518.1784, found: 518.1784

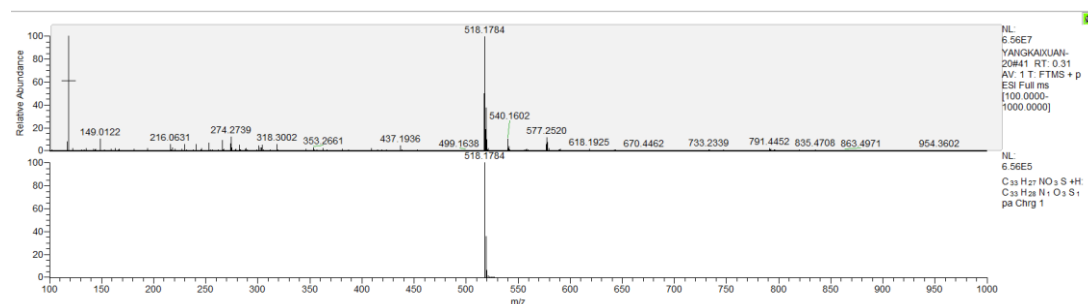

**2-((5R,6R,7R)-2,7-diphenyl-6-(thiophen-3-yl)-6,7-dihydro-5H-pyrano[2,3-d]thiazol-5-yl)-1-phenylethan-1-one (4f)**

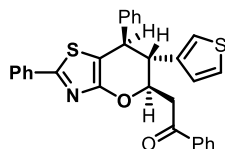

White solid (PE/EtOAc/DCM = 10:1:1, 93% isolated yield, 4:1 dr, 46.0 mg).

**m. p.:** 143-146 °C.

$[\alpha]^{22}_D = -1.0$  ( $c = 1.0$ , CH<sub>2</sub>Cl<sub>2</sub>, 99% ee).

**<sup>1</sup>H NMR (400 MHz, CDCl<sub>3</sub>)** δ 7.85 (m,  $J = 7.2$  Hz, 4H), 7.59 – 7.47 (m, 1H), 7.47 – 7.29 (m, 6H), 7.26 – 7.12 (m, 4H), 7.04 – 6.71 (m, 4H), 5.41 – 5.29 (m, 1H), 4.30 (d,  $J = 10.0$

Hz, 1H), 3.57 – 3.32 (m, 2H), 2.99 (dd,  $J = 16.8, 2.8$  Hz, 1H).

**<sup>13</sup>C NMR (101 MHz, CDCl<sub>3</sub>)** δ 196.3, 164.0, 159.9, 142.2, 138.9, 137.0, 133.4, 133.1, 129.9, 128.7, 128.4, 128.3, 128.1, 127.9, 127.3, 126.7, 126.2, 125.6, 122.9, 109.0, 77.4, 49.3, 47.6, 41.8.

**HPLC** (IH, *i*-PrOH/ *n*-hexane/DCM = 91/4/5), flow rate = 1.0 mL/min,  $t_R = 46.791$  min (major).

**HRMS (ESI):** [M+H]<sup>+</sup> calcd for [C<sub>30</sub>H<sub>24</sub>NO<sub>2</sub>S<sub>2</sub>]<sup>+</sup>: 494.1243, found: 494.1242

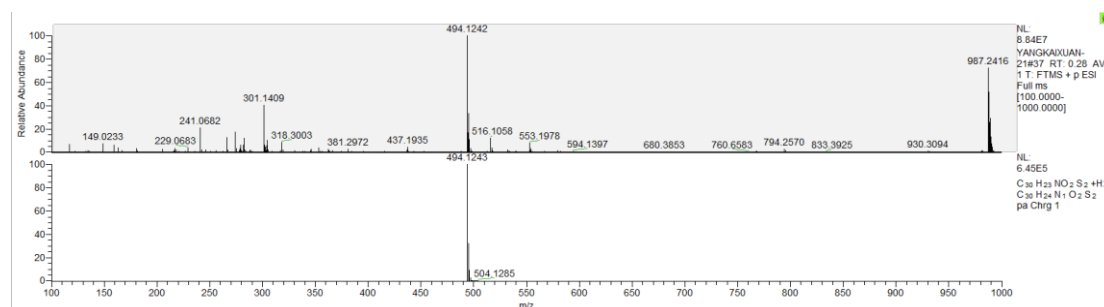

**1-(4-methoxyphenyl)-2-((5R,6R,7R)-2,6,7-triphenyl-6,7-dihydro-5H-pyrano[2,3-d]thiazol-5-yl)ethan-1-one**

(4g)

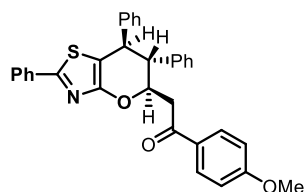

White solid (PE/EtOAc/DCM = 10:1:1, 89% isolated yeild, 6:1 dr, 46.0 mg).

**m. p.:** 80-82 °C.

$[\alpha]^{22}_D = -22.0$  ( $c = 1.0$ , CH<sub>2</sub>Cl<sub>2</sub>, 99% ee).

**<sup>1</sup>H NMR (400 MHz, CDCl<sub>3</sub>)** δ 7.82 (d,  $J = 7.2$  Hz, 1H), 7.33 (s, 1H), 7.14 (dd,  $J = 7.7, 4.0$  Hz, 1H), 6.99 (s, 1H), 6.92 (d,  $J = 3.6$  Hz, 1H), 6.86 (d,  $J = 6.8$  Hz, 4H), 5.43 – 5.28 (m, 1H), 4.35 (d,  $J = 10.4$ , 1H), 3.81 (s, 3H), 3.37 (dd, 16.8 Hz, 8.0 Hz, 1H), 3.16 (t, 10.8 Hz, 1H), 2.80 (dd,  $J = 16.8$  Hz, 2.8 Hz, 1H).

**<sup>13</sup>C NMR (101 MHz, CDCl<sub>3</sub>)** δ 194.9, 163.9, 163.4, 159.8, 142.2, 138.8, 133.5, 130.4, 130.2, 129.8, 128.8, 128.7, 128.4, 128.2, 128.0, 127.4, 127.2, 125.6, 113.5, 109.4, 77.7, 55.4, 53.7, 47.7, 41.3.

**HPLC** (AD, *i*-PrOH/ *n*-hexane = 80/20), flow rate = 1.0 mL/min,  $t_R = 47.72$  min (major),  $t_R = 60.828$  min (major).

**HRMS (ESI):** [M+H]<sup>+</sup> calcd for [C<sub>33</sub>H<sub>28</sub>NO<sub>3</sub>S]<sup>+</sup>: 518.1784, found: 518.1784

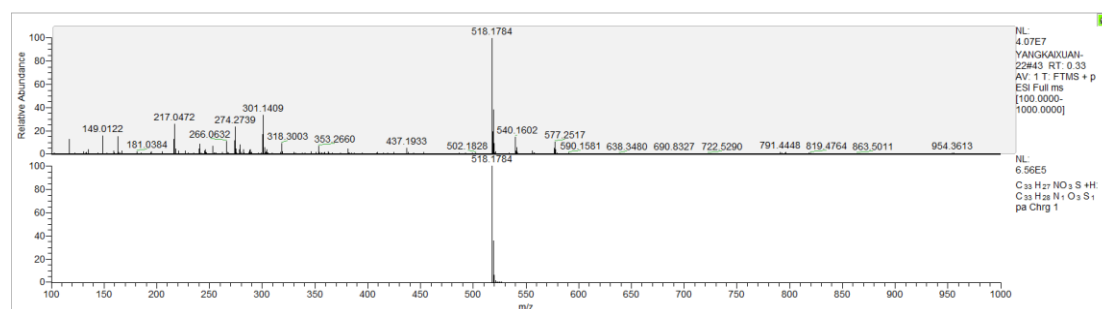

**1-(4-pentylphenyl)-2-((5R,6R,7R)-2,6,7-triphenyl-6,7-dihydro-5H-pyrano[2,3-d]thiazol-5-yl)ethan-1-one** (4h)

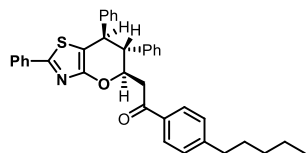

White solid (PE/EtOAc/DCM = 10:1:1, 90% isolated yeild, 6:1 dr, 50.0 mg).

**m. p.:** 83-84 °C.

$[\alpha]^{22}_D = -15.0$  ( $c = 1.0$ , CH<sub>2</sub>Cl<sub>2</sub>, 99% ee).

**<sup>1</sup>H NMR (400 MHz, CDCl<sub>3</sub>)** δ 7.89 – 7.80 (m, 2H), 7.75 (d,  $J = 8.4$  Hz, 2H), 7.35 (dd,  $J = 4.0, 2.8$  Hz, 3H), 7.24 – 7.10 (m, 8H), 7.07 – 6.89 (m, 4H), 5.37 (ddd,  $J = 10.8, 8.4, 2.8$  Hz, 1H), 4.36 (d,  $J = 10.4$  Hz, 1H), 3.43 (dd,  $J = 16.8, 8.4$  Hz, 1H), 3.20 (t,  $J = 10.4$  Hz, 1H), 2.83 (dd,  $J = 16.8, 2.8$  Hz, 1H), 2.68 – 2.54 (m, 2H), 1.59 (dd,  $J = 15.2, 7.4$  Hz, 2H), 1.38 – 1.22 (m, 4H), 0.88 (t,  $J = 6.8$  Hz, 3H).

**<sup>13</sup>C NMR (101 MHz, CDCl<sub>3</sub>)** δ 196.1, 163.9, 159.9, 148.8, 142.2, 138.8, 134.7, 133.5, 129.9, 128.8, 128.7, 128.5, 128.3, 128.0, 127.4, 127.3, 125.7, 109.4, 77.6, 53.8, 47.8, 41.7, 35.9, 31.4, 30.7, 22.5, 14.0.

**HPLC** (IH, *i*-PrOH/ *n*-hexane/DCM = 94/1/5), flow rate = 1.0 mL/min,  $t_R = 12.904$  min (major).

**HRMS (ESI):** [M+H]<sup>+</sup> calcd for [C<sub>37</sub>H<sub>36</sub>NO<sub>2</sub>S]<sup>+</sup>: 558.2461, found: 558.2460

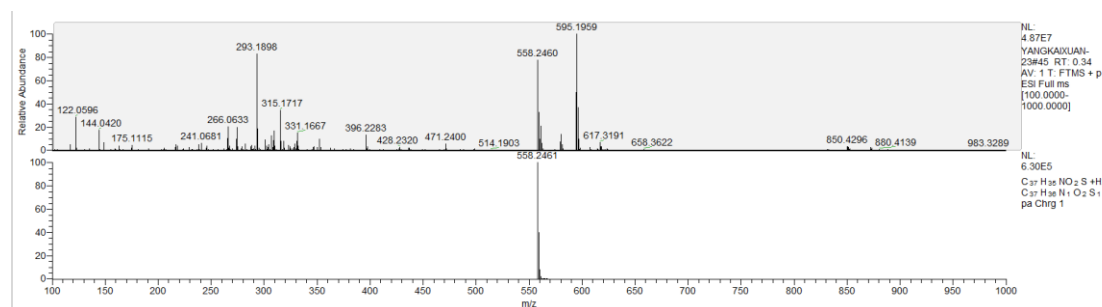

**1-(*m*-tolyl)-2-((5*R*,6*R*,7*R*)-2,6,7-triphenyl-6,7-dihydro-5*H*-pyrano[2,3-*d*]thiazol-5-yl)ethan-1-one (4i)**

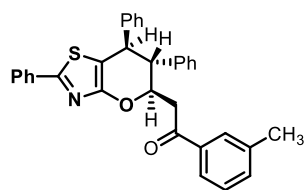

White solid (PE/EtOAc/DCM = 10:1:1, 93% isolated yeild, 6:1 dr, 46.6 mg).

**m. p.:** 83-86 °C.

$[\alpha]^{22}_D = -5.0$  ( $c = 1.0$ , CH<sub>2</sub>Cl<sub>2</sub>, 97% ee).

**<sup>1</sup>H NMR (400 MHz, CDCl<sub>3</sub>)** δ 7.85 (m, 2H), 7.63 (m, 2H), 7.39 – 7.26 (m, 5H), 7.24 – 7.10 (m, 6H), 7.07 – 6.89 (m, 4H), 5.37 (ddd,  $J = 10.8, 8.4, 2.8$  Hz, 1H), 4.36 (d,  $J = 10.0$  Hz, 1H), 3.44 (dd,  $J = 17.2, 8.4$  Hz, 1H), 3.20 (t,  $J = 10.4$  Hz, 1H), 2.85 (dd,  $J = 17.2, 2.8$  Hz, 1H), 2.37 (s, 3H).

**<sup>13</sup>C NMR (101 MHz, CDCl<sub>3</sub>)** δ 196.7, 163.9, 159.8, 142.1, 138.8, 138.2, 137.1, 133.8, 133.5, 129.9, 128.8, 128.7, 128.6, 128.4, 128.3, 128.0, 127.4, 127.3, 125.7, 125.3, 109.4, 77.6, 53.8, 47.8, 41.9, 21.3.

**HPLC** (IC, *i*-PrOH/ *n*-hexane = 80/20), flow rate = 1.0 mL/min,  $t_R = 34.604$  min (major),  $t_R = 39.219$  min (minor);

**HRMS (ESI):** [M+H]<sup>+</sup> calcd for [C<sub>33</sub>H<sub>28</sub>NO<sub>2</sub>S]<sup>+</sup>: 502.1835, found: 502.1833

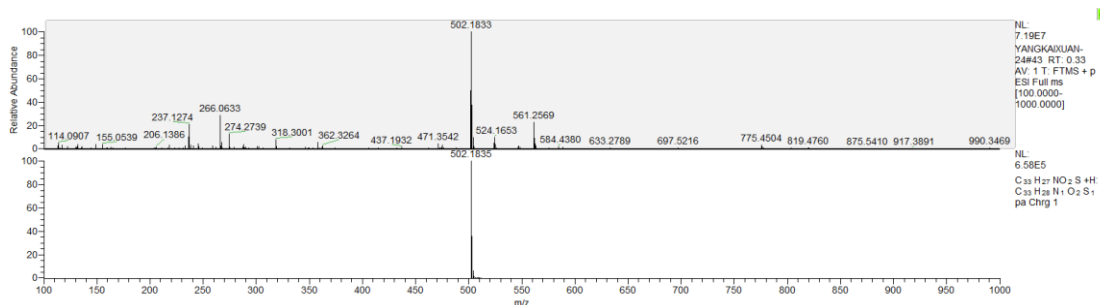

**1-(3-chlorophenyl)-2-((5R,6R,7R)-2,6,7-triphenyl-6,7-dihydro-5H-pyrano[2,3-d]thiazol-5-yl)ethan-1-one (4j)**

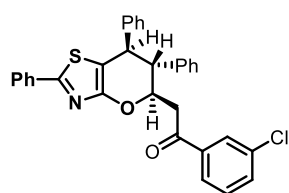

White solid (PE/EtOAc/DCM = 10:1:1, 97% isolated yeild, 7:1 dr, 50.6 mg).

**m. p.:** 92-95 °C.

$[\alpha]^{22}_D = -5.0$  ( $c = 1.0$ ,  $\text{CH}_2\text{Cl}_2$ , 94% ee).

**$^1\text{H}$  NMR (400 MHz,  $\text{CDCl}_3$ )**  $\delta$  7.85 (m, 2H), 7.63 (m, 2H), 7.39 – 7.26 (m, 5H), 7.24 – 7.10 (m, 6H), 7.07 – 6.89 (m, 4H), 5.37 (ddd,  $J = 10.8, 8.0, 2.8$  Hz, 1H), 4.36 (d,  $J = 10.0$  Hz, 1H), 3.44 (dd,  $J = 16.8, 8.0$  Hz, 1H), 3.20 (t,  $J = 10.4$  Hz, 1H), 2.85 (dd,  $J = 17.2, 2.8$  Hz, 1H), 2.37 (s, 3H).

**$^{13}\text{C}$  NMR (101 MHz,  $\text{CDCl}_3$ )**  $\delta$  195.2, 164.0, 159.6, 142.0, 138.5, 138.4, 134.7, 133.4, 132.9, 129.9, 129.7, 128.9, 128.7, 128.4, 128.3, 128.2, 128.0, 127.5, 127.3, 126.2, 125.6, 109.5, 77.5, 53.6, 47.6, 41.8.

**HPLC** (IH, *i*-PrOH/ *n*-hexane/DCM = 94/1/5), flow rate = 1.0 mL/min,  $t_R = 14.048$  min (minor),  $t_R = 24.264$  min (major).

**HRMS (ESI):**  $[\text{M}+\text{H}]^+$  calcdfor  $[\text{C}_{32}\text{H}_{25}\text{ClNO}_2\text{S}]^+$ : 522.1289, found: 522.1290

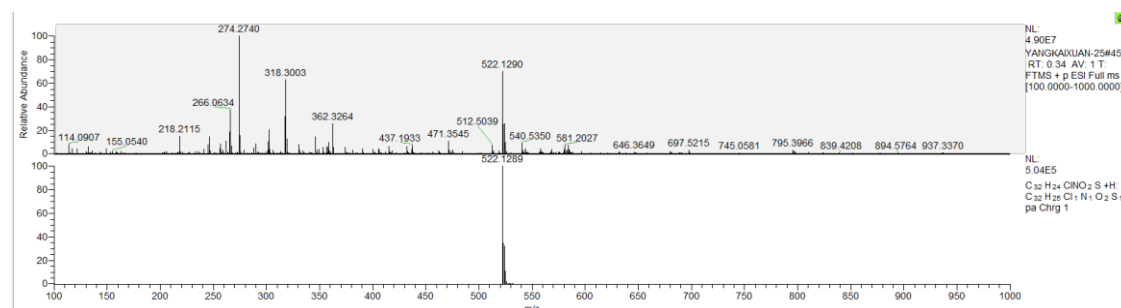

**1-(*o*-tolyl)-2-((5R,6R,7R)-2,6,7-triphenyl-6,7-dihydro-5H-pyrano[2,3-d]thiazol-5-yl)ethan-1-one (4k)**

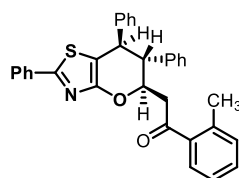

White solid (PE/EtOAc/DCM = 10:1:1, 88% isolated yeild, 5:1 dr, 44.0 mg).

**m. p.:** 69-70 °C.

$[\alpha]^{22}_D = -10.0$  ( $c = 1.0$ ,  $\text{CH}_2\text{Cl}_2$ , 94% ee).

**$^1\text{H}$  NMR (400 MHz,  $\text{CDCl}_3$ )**  $\delta$  7.90 – 7.79 (m, 2H), 7.53 – 7.27 (m, 7H), 7.25 – 7.09 (m, 9H), 7.00 (d,  $J = 6.6$  Hz, 2H), 6.92 (m, 2H), 5.29 (ddd,  $J = 10.8, 8.0, 2.8$  Hz, 1H), 4.36 (d,  $J = 10.4$ , 1H), 3.33 (dd,  $J = 16.8, 8.0$  Hz, 1H), 3.17 (t,  $J = 10.4$  Hz, 1H), 2.84 (dd,  $J = 16.8, 2.8$  Hz, 1H), 2.44 (s, 3H).

**$^{13}\text{C}$  NMR (101 MHz,  $\text{CDCl}_3$ )**  $\delta$  196.3, 164.0, 159.8, 138.0, 137.0, 133.4, 133.1, 130.1, 128.9, 128.8, 128.5, 128.3, 128.1, 127.7, 125.7, 124.9, 111.8, 111.5, 108.0, 104.0, 103.8, 77.7, 52.2, 41.6, 29.7.

**HPLC** (IH, *i*-PrOH/ *n*-hexane/DCM = 94/1/5), flow rate = 1.0 mL/min,  $t_R = 11.274$  min (minor),  $t_R = 12.349$  min (major).

**HRMS (ESI):**  $[\text{M}+\text{H}]^+$  calcdfor  $[\text{C}_{33}\text{H}_{28}\text{NO}_2\text{S}]^+$ : 502.1835, found: 502.1834

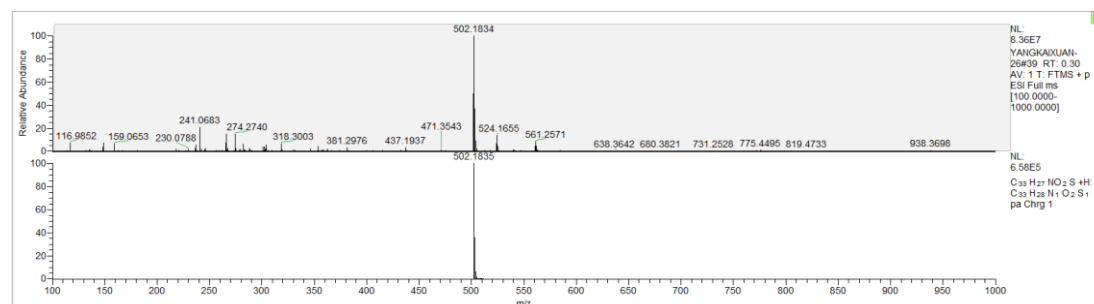

### 1-((5R,6R,7R)-2,6,7-triphenyl-6,7-dihydro-5H-pyrano[2,3-d]thiazol-5-yl)propan-2-one (4l)

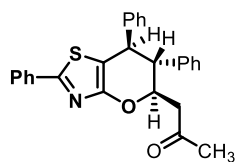

White solid (PE/EtOAc/DCM = 10:1:1, 91% isolated yeild, 9:1 dr, 39.0 mg).

**m. p.:** 86-88 °C.

$[\alpha]^{22}_D = -7.0$  ( $c = 1.0$ , CH<sub>2</sub>Cl<sub>2</sub>, 98% ee).

**<sup>1</sup>H NMR (400 MHz, CDCl<sub>3</sub>)**  $\delta$  7.85 (m,  $J = 5.6, 3.0, 1.5$  Hz, 2H), 7.69 – 7.59 (m, 2H), 7.44 – 7.25 (m, 6H), 7.24 – 7.10 (m, 6H), 7.09 – 6.86 (m, 4H), 5.37 (ddd,  $J = 10.8, 8.2, 2.7$  Hz, 1H), 4.36 (d,  $J = 10.3$  Hz, 1H), 3.44 (dd,  $J = 17.0, 8.2$  Hz, 1H), 3.20 (t,  $J = 10.5$  Hz, 1H), 2.85 (dd,  $J = 16.9, 2.7$  Hz, 1H), 2.36 (s, 3H).

**<sup>13</sup>C NMR (101 MHz, CDCl<sub>3</sub>)**  $\delta$  196.7, 163.9, 159.8, 142.1, 138.8, 138.2, 137.0, 133.8, 133.5, 129.9, 128.8, 128.7, 128.6, 128.4, 128.3, 128.0, 127.4, 127.3, 125.7, 125.3, 109.4, 77.6, 53.7, 47.7, 41.8, 21.3.

**HPLC (IH, *i*-PrOH/ *n*-hexane/DCM = 94/1/5), flow rate = 1.0 mL/min,  $t_R = 34.604$  min (minor),  $t_R = 39.219$  min (major).**

**HRMS (ESI):** [M+H]<sup>+</sup> calcdfor [C<sub>27</sub>H<sub>23</sub>NO<sub>2</sub>S]: 426.1522, found: 426.1521

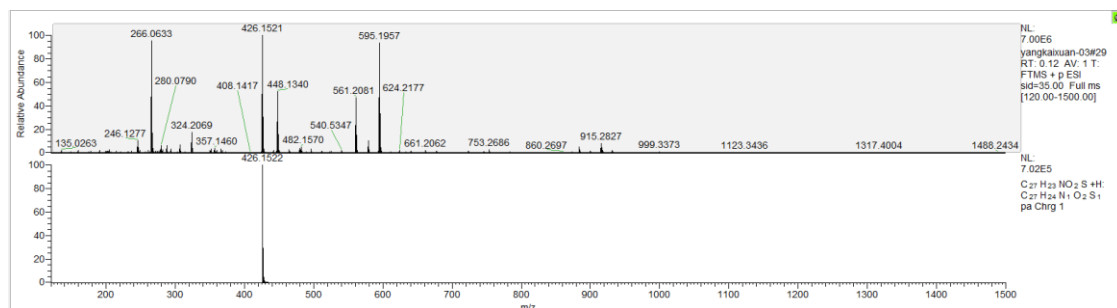

### 1-(3,5-dimethyl-1H-pyrazol-1-yl)-2-((5R,6R,7R)-2,6,7-triphenyl-6,7-dihydro-5H-pyrano[2,3-d]thiazol-5-yl)ethan-1-one (5a)

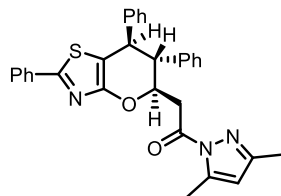

White solid (PE/EtOAc/DCM = 10:1:1, 96% isolated yeild, 8:1 dr, 48.5 mg).

**m. p.:** 85-88 °C.

$[\alpha]^{22}_D = -14.0$  ( $c = 1.0$ , CH<sub>2</sub>Cl<sub>2</sub>, 99% ee).

**<sup>1</sup>H NMR (600 MHz, cdcl<sub>3</sub>)**  $\delta$  7.96 – 7.75 (m, 2H), 7.36 (d,  $J = 3.0$  Hz, 3H), 7.24 – 7.08 (m, 6H), 7.08 – 6.82 (m, 4H), 5.90 (s, 1H), 5.32 (m, 1H), 4.35 (d,  $J = 10.2$  Hz, 1H), 3.71 (dd,  $J = 17.0, 9.0$  Hz, 1H), 3.20 (t,  $J = 10.8$  Hz, 1H), 3.02 (dd,  $J = 16.8, 2.4$  Hz, 1H), 2.50 (s, 3H), 2.18 (s, 3H).

**<sup>13</sup>C NMR (101 MHz, CDCl<sub>3</sub>)**  $\delta$  170.4, 159.9, 151.8, 144.2, 142.1, 138.6, 133.5, 129.9, 128.8, 128.7, 128.5, 128.3, 128.1, 127.4, 127.3, 125.7, 111.2, 109.5, 77.8, 53.4, 47.8, 39.0, 14.5, 13.7.

**HPLC (IC, *i*-PrOH/ *n*-hexane = 93/7), flow rate = 1.0 mL/min,  $t_R = 49.205$  min (minor);**

**HRMS (ESI):** [M+H]<sup>+</sup> calcdfor [C<sub>31</sub>H<sub>28</sub>N<sub>3</sub>O<sub>2</sub>S]<sup>+</sup>: 506.1897, found: 506.1899

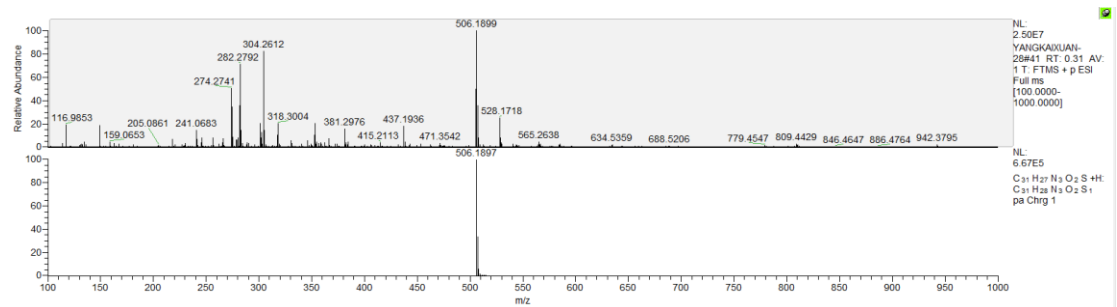

**2-((5R,6R,7R)-6-(4-bromophenyl)-2,7-diphenyl-6,7-dihydro-5H-pyrano[2,3-d]thiazol-5-yl)-1-(3,5-dimethyl-1H-pyrazol-1-yl)ethan-1-one (5b)**

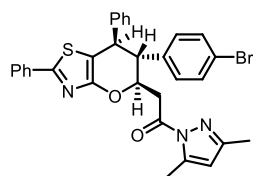

Yellow solid (PE/EtOAc/DCM = 10:1:1, 93% isolated yeild, 13:1 dr, 54.2 mg).

**m. p.:** 94-96 °C.

$[\alpha]^{22}_{\text{D}} = -37.0$  ( $c = 1.0$ ,  $\text{CH}_2\text{Cl}_2$ , 98% ee).

**$^1\text{H NMR}$  (400 MHz,  $\text{CDCl}_3$ )**  $\delta$  7.99 – 7.77 (m, 2H), 7.48 – 7.13 (m, 8H), 7.01 (d,  $J = 6.8$  Hz, 2H), 6.80 (d,  $J = 8.4$  Hz, 2H), 5.90 (s, 1H), 5.41 – 5.18 (ddd, 10.8 Hz, 8.0 Hz, 2.8 Hz, 1H), 4.32 (d,  $J = 10.0$  Hz, 1H), 3.70 (dd,  $J = 17.2, 9.2$  Hz, 1H), 3.14 (t,  $J = 10.4$  Hz, 1H), 3.02 (dd,  $J = 17.2, 2.8$  Hz, 1H), 2.50 (s, 3H), 2.18 (s, 3H).

**$^{13}\text{C NMR}$  (101 MHz,  $\text{CDCl}_3$ )**  $\delta$  170.3, 164.2, 159.9, 151.9, 144.2, 141.2, 138.2, 133.4, 131.5, 130.1, 129.7, 128.9, 128.8, 128.4, 127.6, 125.7, 121.2, 111.2, 108.6, 77.8, 53.4, 47.3, 38.9, 14.5, 13.7.

**HPLC** (IC, *i*-PrOH/ *n*-hexane = 90/10), flow rate = 1.0 mL/min,  $t_{\text{R}} = 33.13$  min (major),  $t_{\text{R}} = 49.953$  min (minor).

**HRMS (ESI):**  $[\text{M}+\text{H}]^+$  calcd for  $[\text{C}_{31}\text{H}_{27}\text{BrN}_3\text{O}_2\text{S}]^+$ : 584.1002, 586.0981, found: 584.1005, 586.0984

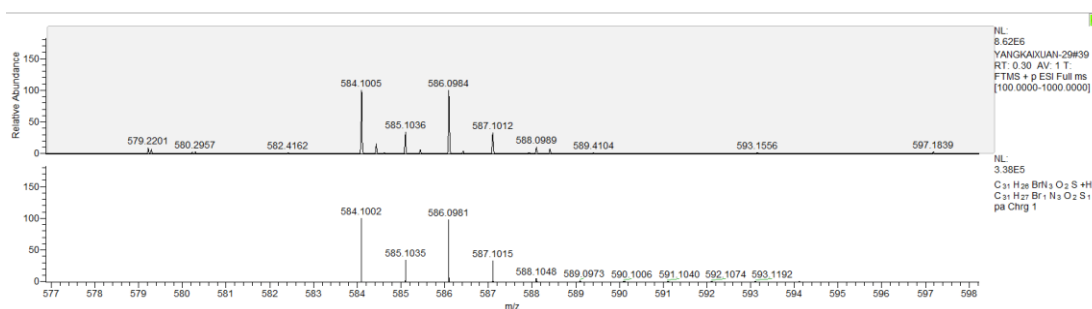

**1-(3,5-dimethyl-1H-pyrazol-1-yl)-2-((5R,6R,7R)-2,7-diphenyl-6-(p-tolyl)-6,7-dihydro-5H-pyrano[2,3-d]thiazol-5-yl)ethan-1-one (5c)**

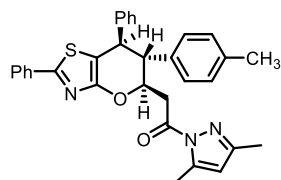

White solid (PE/EtOAc/DCM = 10:1:1, 99% isolated yeild, 13:1 dr, 51.3 mg).

**m. p.:** 168-169 °C.

$[\alpha]^{22}_{\text{D}} = -7.0$  ( $c = 1.0$ ,  $\text{CH}_2\text{Cl}_2$ , 99% ee).

**$^1\text{H NMR}$  (400 MHz,  $\text{Chloroform-}d$ )**  $\delta$  7.85 (m,  $J = 6.8, 2.8$  Hz, 2H), 7.36 (m,  $J = 3.2, 2.8$  Hz, 3H), 7.23 – 7.06 (m, 3H), 7.06 – 6.77 (m, 6H), 5.89 (s, 1H), 5.28 (ddd,  $J = 11.2, 8.9, 2.8$  Hz, 1H), 4.33 (d,  $J = 10.4$  Hz, 1H), 3.68 (dd,  $J = 16.8, 9.2$  Hz, 1H), 3.16 (t,  $J = 10.4$  Hz, 1H), 3.04 (dd,  $J = 16.8, 2.8$  Hz, 1H), 2.49 (s, 3H), 2.24 (s, 3H), 2.18 (s, 3H).

**$^{13}\text{C NMR}$  (101 MHz,  $\text{CDCl}_3$ )**  $\delta$  170.4, 163.9, 159.7, 151.8, 144.1, 142.2, 136.2, 135.4, 133.5, 129.9, 129.4, 128.7, 128.3, 128.3, 128.1, 127.2, 125.7, 111.1, 109.6, 78.0, 53.0, 47.6, 39.1, 2=1.0, 14.5, 13.7.

**HPLC** (IC, *i*-PrOH/ *n*-hexane = 90/10), flow rate = 1.0 mL/min,  $t_{\text{R}} = 40.181$  min (major),  $t_{\text{R}} = 56.688$  min (minor).

**HRMS (ESI):**  $[\text{M}+\text{H}]^+$  calcd for  $[\text{C}_{32}\text{H}_{30}\text{N}_3\text{O}_2\text{S}]^+$ : 520.2053, found: 520.2056

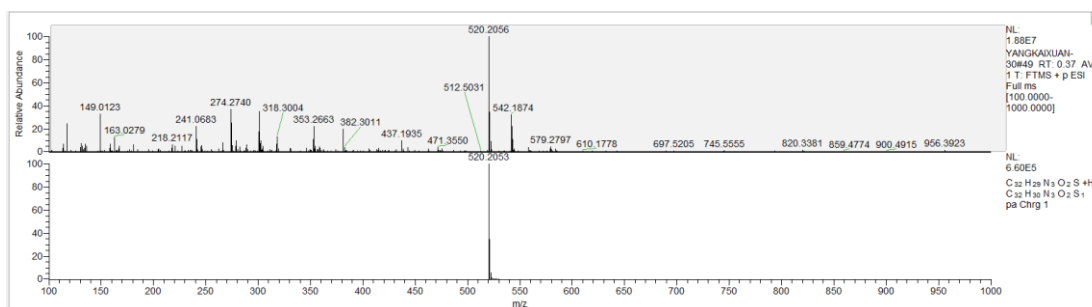



**2-((5R,6R,7R)-6-(4-chlorophenyl)-2,7-diphenyl-6,7-dihydro-5H-pyrano[2,3-d]thiazol-5-yl)-1-(3,5-dimethyl-1H-pyrazol-1-yl)ethan-1-one (5d)**

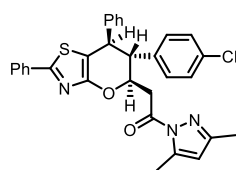

White solid (PE/EtOAc/DCM = 10:1:1, 93% isolated yield, 11:1 dr, 50.3 mg).

**m. p.:** 176-178 °C.

$[\alpha]^{22}_D = -27.0$  ( $c = 1.0$ ,  $\text{CH}_2\text{Cl}_2$ , 99% ee).

**$^1\text{H NMR}$  (400 MHz,  $\text{CDCl}_3$ )**  $\delta$  7.85 (dt,  $J = 7.6, 3.2$  Hz, 2H), 7.42 – 7.28 (m, 3H), 7.17 (m, 5H), 7.03 – 6.85 (m, 4H), 5.91 (s, 1H), 5.33 – 5.19 (m, 1H), 4.29 (d,  $J = 10.4$  Hz, 1H),

3.64 (dd,  $J = 16.8, 8.4$  Hz, 1H), 3.20 (t,  $J = 10.4$  Hz, 1H), 3.09 (dd,  $J = 16.8, 3.2$  Hz, 1H), 2.49 (s, 3H), 2.18 (s, 3H).  
 **$^{13}\text{C NMR}$  (101 MHz,  $\text{CDCl}_3$ )**  $\delta$  170.1, 164.1, 159.6, 151.9, 144.2, 141.7, 137.0, 133.4, 133.3, 130.0, 129.8, 128.9, 128.76, 128.4, 128.0, 127.5, 125.7, 111.3, 109.2, 77.6, 52.9, 47.7, 39.0, 14.4, 13.7.

**HPLC** (IC, *i*-PrOH/ *n*-hexane = 90/10), flow rate = 1.0 mL/min,  $t_R = 30.673$  min (major).

**HRMS (ESI):**  $[\text{M}+\text{H}]^+$  calcd for  $[\text{C}_{31}\text{H}_{26}\text{ClN}_3\text{O}_2\text{S}]^+$ : 540.1507, found: 540.1509

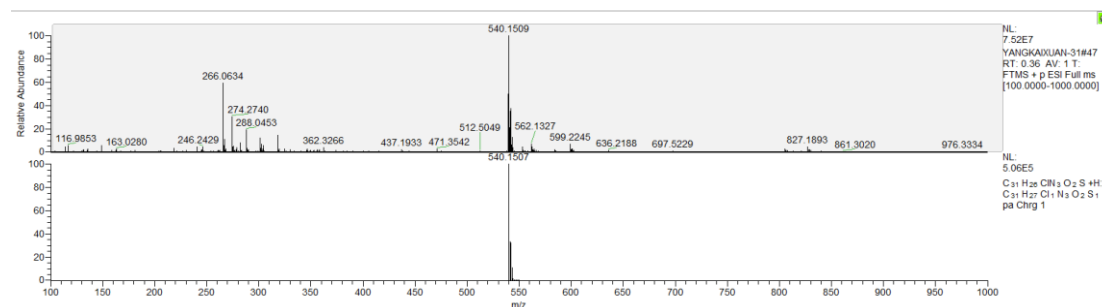

**1-(3,5-dimethyl-1H-pyrazol-1-yl)-2-((5R,6R,7R)-2,7-diphenyl-6-(*m*-tolyl)-6,7-dihydro-5H-pyrano[2,3-d]thiazol-5-yl)ethan-1-one (5e)**

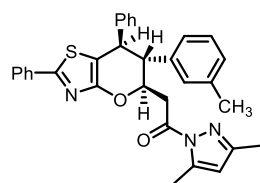

Yellow solid (PE/EtOAc/DCM = 10:1:1, 95% isolated yield, 8:1 dr, 51.3 mg).

**m. p.:** 99-102 °C.

$[\alpha]^{22}_D = -5.0$  ( $c = 1.0$ ,  $\text{CH}_2\text{Cl}_2$ , 97% ee).

**$^1\text{H NMR}$  (400 MHz,  $\text{CDCl}_3$ )**  $\delta$  7.93 – 7.81 (m, 2H), 7.44 – 7.32 (m, 3H), 7.22 – 7.13 (m, 3H), 7.08 (t,  $J = 7.6$  Hz, 1H), 7.01 – 6.88 (m, 3H), 6.80 (d,  $J = 9.5$  Hz, 2H), 5.91 (s, 1H), 5.36 – 5.24 (m, 1H), 4.35 (d,  $J = 10.0$  Hz, 1H), 3.70 (dd,  $J = 16.8, 9.2$  Hz, 1H), 3.15 (t,  $J = 10.8$  Hz, 1H), 3.03 (dd,  $J = 17.2, 2.8$  Hz, 1H), 2.50 (s, 3H), 2.23 (s, 3H), 2.19 (s, 3H).

**$^{13}\text{C NMR}$  (101 MHz,  $\text{CDCl}_3$ )**  $\delta$  144.2, 142.2, 138.4, 138.3, 133.5, 129.9, 128.8, 128.5, 128.3, 128.2, 128.1, 127.2, 125.7, 111.2, 109.6, 77.9, 53.3, 47.6, 39.0, 21.4, 14.5, 13.7.

**HPLC** (IC, *i*-PrOH/ *n*-hexane = 90/10), flow rate = 1.0 mL/min,  $t_R = 29.178$  min (major).  $t_R = 49.0$  min (minor)

**HRMS (ESI):**  $[\text{M}+\text{H}]^+$  calcd for  $[\text{C}_{31}\text{H}_{27}\text{N}_3\text{O}_2\text{S}]^+$ : 540.1509, found: 540.1507

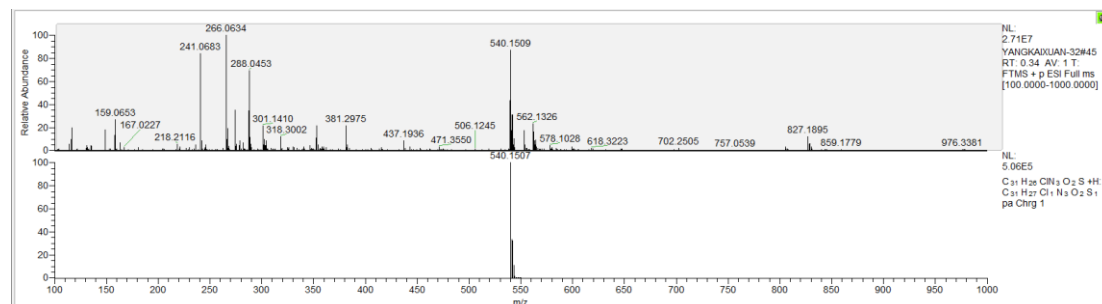

**1-(3,5-dimethyl-1H-pyrazol-1-yl)-2-((5R,6S,7R)-2,7-diphenyl-6-(thiophen-2-yl)-6,7-dihydro-5H-pyrano[2,3-d]thiazol-5-yl)ethan-1-one (5f)**

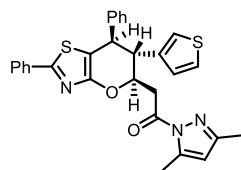

White solid (PE/EtOAc/DCM = 10:1:1, 98% isolated yeild, 6:1 dr, 50.0 mg).

**m. p.:** 146-147 °C.

$[\alpha]^{22}_{\text{D}}$  = -15.0 ( $c = 1.0$ , CH<sub>2</sub>Cl<sub>2</sub>, 99% ee).

**<sup>1</sup>H NMR (600 MHz, Chloroform-*d*)**  $\delta$  7.84 (m, 2H), 7.39 – 7.32 (m, 3H), 7.25 – 7.18 (m, 3H), 7.16 (m, 1H), 7.07 – 7.00 (m, 2H), 6.82 (dd,  $J = 4.8, 3.0$  Hz, 1H), 6.68 (dd,  $J = 3.6, 1.2$  Hz, 1H), 5.92 (d,  $J = 1.2$  Hz, 1H), 5.22 (ddd,  $J = 10.8, 9.0, 3.0$  Hz, 1H), 4.36 (d,  $J = 10.2$  Hz, 1H), 3.75 (dd,  $J = 17.4, 9.0$  Hz, 1H), 3.63 (t,  $J = 10.2$  Hz, 1H), 3.19 (dd,  $J = 17.4, 3.0$  Hz, 1H), 2.53 (d,  $J = 1.1$  Hz, 3H), 2.19 (s, 3H).

**<sup>13</sup>C NMR (151 MHz, cdcl<sub>3</sub>)**  $\delta$  170.2, 165.0, 159.9, 152.0, 144.0, 143.8, 140.6, 133.5, 130.1, 128.8, 128.0, 127.4, 126.6, 126.3, 125.9, 125.0, 111.2, 72.4, 46.5, 45.5, 38.1, 14.4, 13.7.

**HPLC** (IC, *i*-PrOH/ *n*-hexane = 90/10), flow rate = 1.0 mL/min,  $t_{\text{R}} = 35.996$  min (major).

**HRMS (ESI):** [M+H]<sup>+</sup> calcdfor [C<sub>29</sub>H<sub>26</sub>N<sub>3</sub>O<sub>2</sub>S<sub>2</sub>]<sup>+</sup>: 512.1461, found: 512.1462

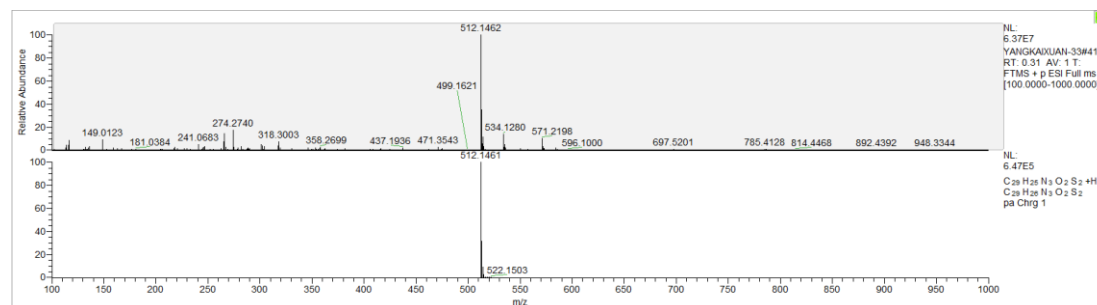

**2-((5R,6R,7R)-7-(4-bromophenyl)-2,6-diphenyl-6,7-dihydro-5H-pyrano[2,3-d]thiazol-5-yl)-1-(3,5-dimethyl-1H-pyrazol-1-yl)ethan-1-one (5g)**

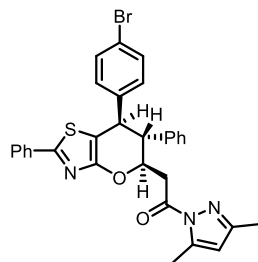

Yellow solid (PE/EtOAc/DCM = 10:1:1, 87% isolated yeild, 11:1 dr, 50.8 mg).

**m. p.:** 78-80 °C.

$[\alpha]^{22}_{\text{D}}$  = -11.0 ( $c = 1.0$ , CH<sub>2</sub>Cl<sub>2</sub>, 99% ee).

**<sup>1</sup>H NMR (400 MHz, Chloroform-*d*)**  $\delta$  7.99 – 7.77 (m, 2H), 7.47 – 7.13 (m, 8H), 7.12 – 6.93 (m, 2H), 6.91 – 6.70 (m, 2H), 5.90 (d,  $J = 1.2$  Hz, 1H), 5.30 (ddd,  $J = 10.8, 8.8, 2.8$  Hz, 1H), 4.32 (d,  $J = 10.4$  Hz, 1H), 3.70 (dd,  $J = 17.2, 9.2$  Hz, 1H), 3.14 (t,  $J = 10.4$  Hz, 1H), 3.02 (dd,  $J = 17.2, 2.8$  Hz, 1H), 2.50 (s, 3H), 2.18 (s, 3H).

**<sup>13</sup>C NMR (101 MHz, CDCl<sub>3</sub>)**  $\delta$  170.3, 164.2, 159.9, 151.9, 144.2, 141.2, 138.2, 133.4, 131.5, 130.1, 129.7, 128.9, 128.8, 128.4, 127.6, 125.7, 121.2, 111.2, 108.6, 77.8, 53.4, 47.3, 38.9, 14.5, 13.7.

**HPLC** (IC, *i*-PrOH/ *n*-hexane = 90/10), flow rate = 1.0 mL/min,  $t_{\text{R}} = 42.521$  min (major).

**HRMS (ESI):** [M+H]<sup>+</sup> calcdfor [C<sub>31</sub>H<sub>27</sub>BrN<sub>3</sub>O<sub>2</sub>S]<sup>+</sup>: 584.1002, 586.0981, found: 584.1002, 586.0986

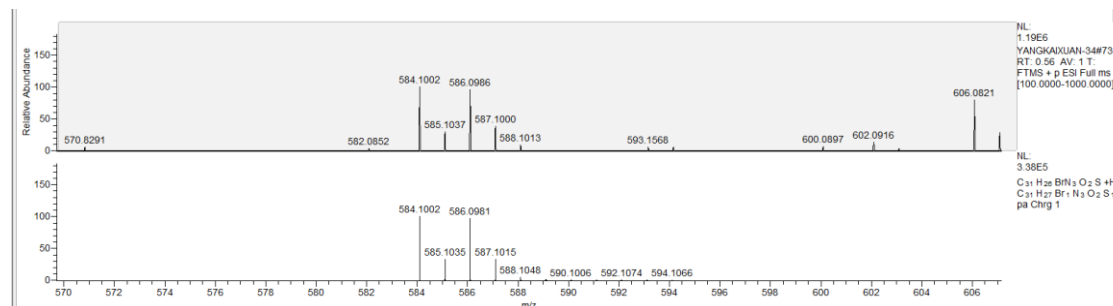

**2-((5R,6R,7R)-7-(4-chlorophenyl)-2,6-diphenyl-6,7-dihydro-5H-pyrano[2,3-d]thiazol-5-yl)-1-(3,5-dimethyl-1H-pyrazol-1-yl)ethan-1-one (5h)**

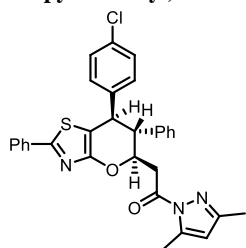

White solid (PE/EtOAc/DCM = 10:1:1, 96% isolated yield, 9:1 dr, 51.8 mg).

**m. p.:** 124-126 °C.

$[\alpha]_D^{22} = -22.0$  ( $c = 1.0$ ,  $\text{CH}_2\text{Cl}_2$ , 99% ee).

**$^1\text{H}$  NMR (400 MHz, Chloroform- $d$ )**  $\delta$  8.02 – 7.74 (m, 2H), 7.53 – 7.31 (m, 3H), 7.25 – 7.09 (m, 5H), 7.00 (d,  $J = 7.2$  Hz, 2H), 6.85 (d,  $J = 8.4$  Hz, 2H), 5.90 (s, 1H), 5.30 (ddd,  $J = 11.2, 8.8, 2.8$  Hz, 1H), 4.33 (d,  $J = 10.4$  Hz, 1H), 3.70 (dd,  $J = 16.8, 8.8$  Hz, 1H), 3.14 (t,  $J = 10.8$  Hz, 1H), 3.02 (dd,  $J = 17.2, 2.8$  Hz, 1H), 2.50 (s, 3H), 2.17 (s, 3H).

**$^{13}\text{C}$  NMR (101 MHz,  $\text{CDCl}_3$ )**  $\delta$  170.2, 164.2, 159.8, 151.9, 144.1, 140.6, 138.2, 133.3, 133.0, 130.0, 129.3, 128.8, 128.8, 128.5, 127.6, 125.7, 111.2, 108.6, 77.7, 53.4, 47.2, 38.9, 14.5, 13.7.

**HPLC** (IC,  $i$ -PrOH/  $n$ -hexane = 90/10), flow rate = 1.0 mL/min,  $t_R = 32.774$  min (major).

**HRMS (ESI):**  $[\text{M}+\text{H}]^+$  calcd for  $[\text{C}_{31}\text{H}_{27}\text{ClN}_3\text{O}_2\text{S}]^+$ : 540.1507, found: 540.1508

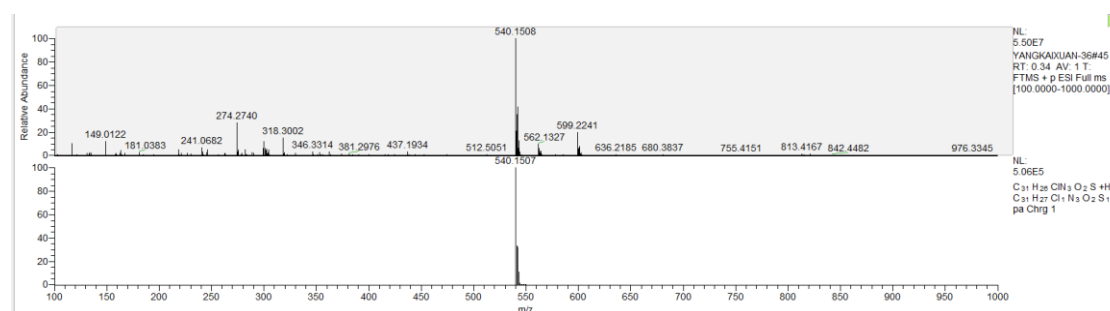

**2-((5R,6R,7R)-7-(2-bromo-4-fluorophenyl)-2,6-diphenyl-6,7-dihydro-5H-pyrano[2,3-d]thiazol-5-yl)-1-(3,5-dimethyl-1H-pyrazol-1-yl)ethan-1-one (5i)**

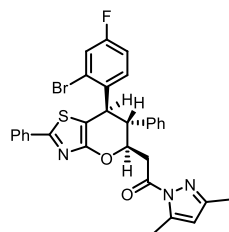

Yellow solid (PE/EtOAc/DCM = 10:1:1, 96% isolated yield, 12:1 dr, 57.5 mg).

**m. p.:** 74-76 °C.

$[\alpha]^{22}_{\text{D}} = -11.0$  ( $c = 1.0$ ,  $\text{CH}_2\text{Cl}_2$ , 99% ee).

$^1\text{H NMR}$  (400 MHz,  $\text{CHCl}_3$ )  $\delta$  7.85 (m, 2H), 7.51 – 7.32 (m, 3H), 7.28 – 7.13 (m, 4H), 7.13 – 6.89 (m, 4H), 5.90 (d,  $J = 1.1$  Hz, 1H), 5.32 (ddd,  $J = 10.8, 8.0, 2.8$  Hz, 1H), 4.72 (d,  $J = 10.8$  Hz, 1H), 3.70 (dd,  $J = 17.2, 9.2$  Hz, 1H), 3.27 (t,  $J = 10.4$  Hz, 1H), 3.04 (dd,  $J = 17.2, 2.8$  Hz, 1H), 2.50 (s, 3H), 2.18 (s, 3H).

$^{13}\text{C NMR}$  (101 MHz,  $\text{CDCl}_3$ )  $\delta$  170.2, 164.1, 160.3 ( $J = 250.0$  Hz), 159.8, 159.0, 151.9, 144.2, 137.7, 133.3, 130.7, 130.1, 128.9, 128.8, 128.3 ( $J = 4.3$  Hz), 128.1, 127.8, 127.7, 125.7, 121.3 ( $J = 4.3$  Hz), 119.1, ( $J = 25.7$  Hz) 111.2, 107.6, 77.9, 51.8, 38.9, 14.5, 13.7.

**HPLC** (IC, *i*-PrOH/ *n*-hexane = 90/10), flow rate = 1.0 mL/min,  $t_{\text{R}} = 72.481$  min (major).

**HRMS (ESI):**  $[\text{M}+\text{H}]^+$  calcd for  $[\text{C}_{31}\text{H}_{26}\text{BrFN}_3\text{O}_2\text{S}]^+$ : 602.0908, 604.0887 found: 602.0906, 604.0889

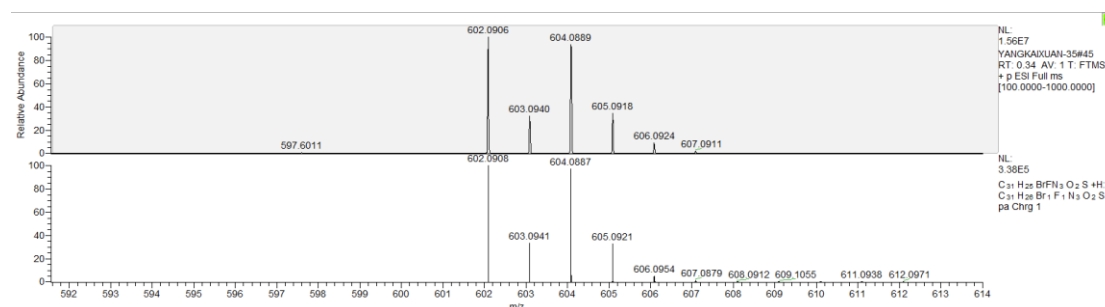

**1-(3,5-dimethyl-4,5-dihydro-1H-pyrazol-1-yl)-2-((5R,6R,7R)-7-(2-methoxyphenyl)-2,6-diphenyl-6,7-dihydro-5H-pyrano[2,3-d]thiazol-5-yl)ethan-1-one (5j)**

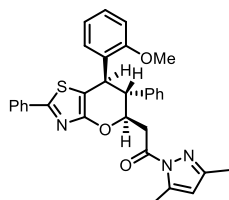

White solid (PE/EtOAc/DCM = 10:1:1, 90% isolated yield, 8:1 dr, 48.2 mg).

**m. p.:** 118-121 °C.

$[\alpha]^{22}_{\text{D}} = -17.0$  ( $c = 1.0$ ,  $\text{CH}_2\text{Cl}_2$ , 91% ee).

$^1\text{H NMR}$  (400 MHz,  $\text{CHCl}_3$ )  $\delta$  8.01 – 7.75 (m, 2H), 7.35 (m, 3H), 7.23 – 6.95 (m, 7H), 6.94 – 6.56 (m, 2H), 5.90 (d,  $J = 1.1$  Hz, 1H), 5.34 (ddd,  $J = 10.4, 9.2, 2.8$  Hz, 1H), 4.92 (s, 1H), 3.72 (dd,  $J = 16.8, 9.2$  Hz, 1H), 3.41 (s, 4H), 3.01 (dd,  $J = 17.2, 2.8$  Hz, 1H), 2.50 (d,  $J = 1.0$  Hz, 3H), 2.18 (s, 3H).

$^{13}\text{C NMR}$  (101 MHz,  $\text{CDCl}_3$ )  $\delta$  170.5, 163.1, 159.5, 157.1, 151.7, 144.1, 138.9, 133.7, 129.7, 128.7, 128.6, 128.3, 127.1, 125.6, 120.7, 111.1, 110.8, 110.0, 77.9, 55.2, 39.1, 14.5, 13.7.

**HPLC** (IC, *i*-PrOH/ *n*-hexane = 97/3), flow rate = 1.0 mL/min,  $t_{\text{R}} = 48.431$  min (major),  $t_{\text{R}} = 56.497$  min (minor).

**HRMS (ESI):**  $[\text{M}+\text{H}]^+$  calcd for  $[\text{C}_{32}\text{H}_{30}\text{N}_3\text{O}_3\text{S}]^+$ : 536.2002, found: 536.2004

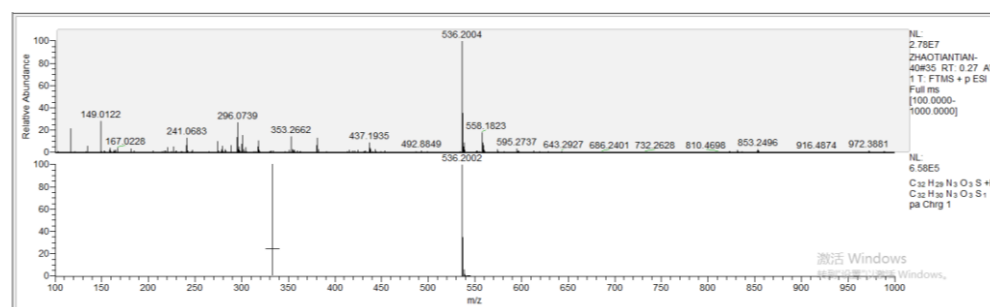

**methyl 2-((5R,6R,7R)-2,7-diphenyl-6-(p-tolyl)-6,7-dihydro-5H-pyrano[2,3-d]thiazol-5-yl)acetate (6c)**

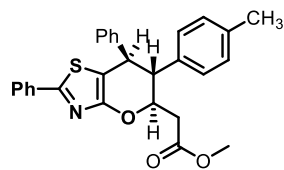

White solid (PE/EtOAc/DCM = 10:1:1, 96% isolated yield, 44 mg).

**m. p.:** 96-99 °C.

$[\alpha]^{22}_D = -14.0$  ( $c = 1.0$ ,  $\text{CH}_2\text{Cl}_2$ , 98% ee).

**$^1\text{H NMR}$  (400 MHz,  $\text{CDCl}_3$ )**  $\delta$  7.93 (dd,  $J = 6.5, 3.1$  Hz, 2H), 7.81 (d,  $J = 7.3$  Hz, 2H), 7.53 (s, 1H), 7.43 – 7.37 (m, 5H), 7.07 (q,  $J = 6.0$  Hz, 4H), 6.90 (d,  $J = 6.5$  Hz, 2H), 5.52 – 5.40 (m, 1H), 4.96 (d,  $J = 6.4$  Hz, 1H), 3.59 (m, 2H), 3.16 (dd,  $J = 17.9, 8.0$  Hz, 1H).

**$^{13}\text{C NMR}$  (101 MHz,  $\text{CDCl}_3$ )**  $\delta$  196.6, 164.5, 160.2, 144.8, 139.7, 136.6, 133.4, 133.3, 130.2, 128.9, 128.8, 128.6, 128.5, 128.0, 127.7, 127.4, 127.3, 125.7, 105.5, 72.7, 50.5, 44.4, 40.7.

**HPLC** (Ic, *i*-PrOH/ *n*-hexane = 90/10), flow rate = 1.0 mL/min,  $t_R = 38.015$ min (major),  $t_R = 48.184$ min (minor)

**HRMS (ESI):**  $[\text{M}+\text{H}]^+$  calcd for  $[\text{C}_{28}\text{H}_{26}\text{NO}_3\text{S}]^+$ : 456.1628, found: 456.1626

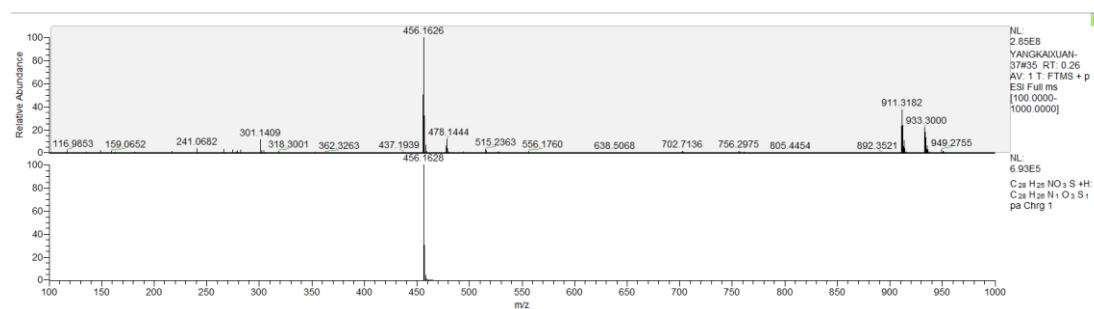

**1-phenyl-2-((5S,6R,7R)-2,6,7-triphenyl-6,7-dihydro-5H-pyrano[2,3-d]thiazol-5-yl)ethan-1-one (3a-minor)**

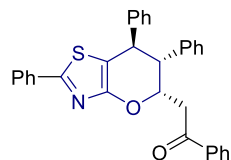

White solid (PE/EtOAc/DCM = 10:1:1, 95% isolated yield, 46.3 mg, 99% ee).

**m. p.:** 68-69 °C.

**$^1\text{H NMR}$  (400 MHz,  $\text{CDCl}_3$ )**  $\delta$  7.91 – 7.79 (m, 2H), 7.36 (dd,  $J = 6.4, 3.6$  Hz, 3H), 7.20 – 7.10 (m, 3H), 7.03 (d,  $J = 7.8$  Hz, 2H), 6.98 – 6.79 (m, 4H), 5.00 (ddd,  $J = 11.2, 8.4, 3.6$  Hz, 1H), 4.35 – 4.25 (m, 1H), 3.62 (s, 3H), 3.07 (t,  $J = 10.4$  Hz, 1H), 2.61 (dd,  $J = 16.0, 8.0$  Hz, 1H), 2.46 (dd,  $J = 16.0, 3.6$  Hz, 1H), 2.27 (s, 3H).

**$^{13}\text{C NMR}$  (101 MHz,  $\text{CDCl}_3$ )**  $\delta$  170.7, 164.0, 160.0, 142.0, 137.0, 135.2, 133.5, 129.9, 129.5, 128.7, 128.3, 128.0, 127.2, 125.6, 109.7, 78.2, 52.9, 51.8, 47.3, 38.4, 21.0.

**HPLC** (IH, *i*-PrOH/ *n*-hexane/DCM = 92/3/5), flow rate = 1.0 mL/min,  $t_R = 12.779$ min (major),  $t_R = 14.048$ min (minor).

**HRMS (ESI):**  $[\text{M}+\text{H}]^+$  calcd for  $[\text{C}_{32}\text{H}_{26}\text{NO}_2\text{S}]^+$ : 488.1679, found: 488.1680

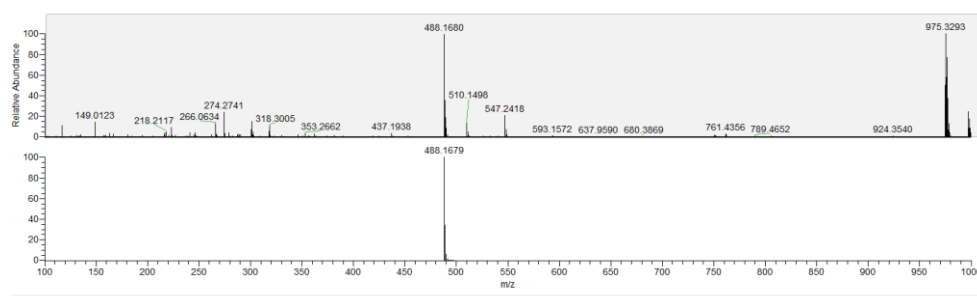

### 1-phenyl-2-((5R,6R,7R)-2,6,7-triphenyl-6,7-dihydro-5H-pyrano[2,3-d]thiazol-5-yl)ethan-1-ol-xia (7a-major)

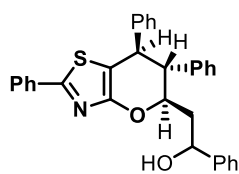

White solid (PE/EtOAc/DCM = 5:1:1, 38% isolated yield, 74.5 mg).

m. p.: 151-152 °C.

$[\alpha]_D^{25} = 15.0$  ( $c = 1.0$ ,  $\text{CH}_2\text{Cl}_2$ , 98% ee).

$^1\text{H NMR}$  (400 MHz,  $\text{CDCl}_3$ )  $\delta$  7.80 (m,  $J = 6.8$ , 2.8 Hz, 2H), 7.44 – 7.21 (m, 8H), 7.21 – 6.98 (m, 6H), 6.85 (m,  $J = 6.4$ , 2.8 Hz, 2H), 6.75 (m,  $J = 6.4$ , 2.8 Hz, 2H), 5.15 (t,  $J = 7.2$  Hz, 1H), 4.37 (td,  $J = 10.0$ , 2.4 Hz, 1H), 4.13 (d,  $J = 10.4$  Hz, 1H), 3.17 (s, 1H), 3.01 (t,  $J = 10.3$  Hz, 1H), 2.20 (m, 1H), 1.80 (m, 1H).

$^{13}\text{C NMR}$  (101 MHz,  $\text{CDCl}_3$ )  $\delta$  164.0, 159.6, 144.0, 142.0, 138.9, 133.4, 129.9, 128.8, 128.6, 128.4, 128.2, 127.9, 127.6, 127.2, 127.2, 126.5, 125.7, 109.7, 79.9, 71.9, 54.3, 47.6, 42.0.

HPLC (IH, *i*-PrOH/ *n*-hexane/DCM = 92/3/5), flow rate = 1.0 mL/min,  $t_R = 25.399$  min (major).

HRMS (ESI):  $[\text{M}+\text{H}]^+$  calcd for  $[\text{C}_{32}\text{H}_{28}\text{NO}_2\text{S}]^+$ : 490.1835, found: 490.1836

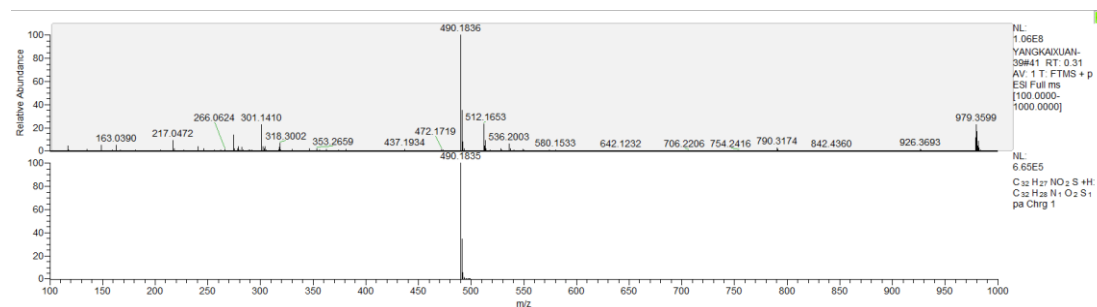

### 1-phenyl-2-((5R,6R,7R)-2,6,7-triphenyl-6,7-dihydro-5H-pyrano[2,3-d]thiazol-5-yl)ethan-1-ol -7a-minor

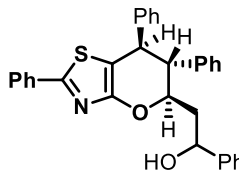

White solid (PE/EtOAc/DCM = 5:1:1, 29% isolated yield, 56.8mg).

m. p.: 144-146 °C.

$[\alpha]_D^{25} = 15.0$  ( $c = 1.0$ ,  $\text{CH}_2\text{Cl}_2$ , 99% ee).

$^1\text{H NMR}$  (400 MHz,  $\text{CDCl}_3$ )  $\delta$  7.97 – 7.81 (m, 2H), 7.45 – 7.34 (m, 3H), 7.26 (m,  $J = 6.4$  Hz, 5H), 7.22 – 7.06 (m, 7H), 6.94 – 6.76 (m, 4H), 5.35 (d,  $J = 10.4$  Hz, 1H), 5.02 – 4.86 (m, 1H), 4.17 (dd,  $J = 10.4$ , 4.4 Hz, 1H), 3.03 (dt,  $J = 20.8$ , 10.4 Hz, 2H), 1.87 (m, 1H), 1.81 – 1.68 (m, 1H).

$^{13}\text{C NMR}$  (101 MHz,  $\text{CDCl}_3$ )  $\delta$  170.7, 164.0, 160.0, 142.1, 137.0, 135.2, 133.5, 129.9, 129.5, 128.7, 128.3, 128.0, 127.2, 125.6, 109.7, 78.2, 52.9, 51.8, 47.3, 38.4, 21.0.

HPLC (IH, *i*-PrOH/ *n*-hexane/DCM = 92/3/5), flow rate = 1.0 mL/min,  $t_R = 12.779$  min (major),  $t_R = 16.048$  min (minor).

HRMS (ESI):  $[\text{M}+\text{H}]^+$  calcd for  $[\text{C}_{32}\text{H}_{28}\text{NO}_2\text{S}]^+$ : 490.1835, found: 490.1835

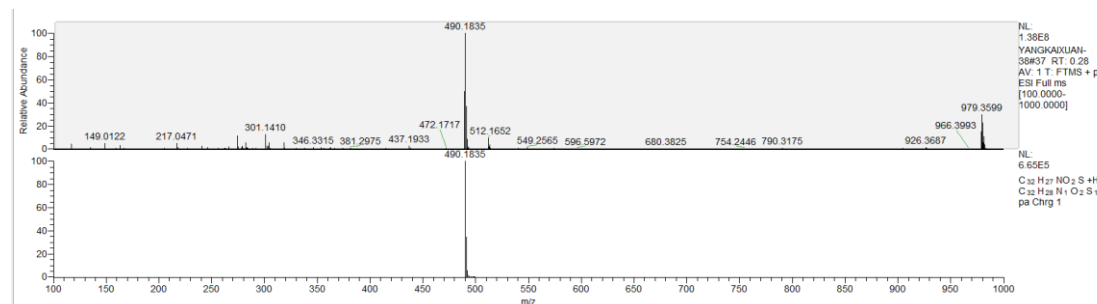

## 5 X-ray Crystallographic Data

## 5. 1. Preparation of crystal.

**3a-major:** The pure compounds (50 mg) of **3a-major** was dissolved in CDCl<sub>3</sub> and removed in NMR tube. After the NMR experiments were finished, the tube was placed in the lab for about one week, during which the crystal was formed. The X-ray was detected after the crystal was formed. The X-ray data was detected by Smart APEX II which was purchased from Bruker.

**3a-minor:** The pure compounds (50 mg) of **3a-minor** was dissolved in DCM in the small bottle, and then the CH<sub>3</sub>OH was added slowly until a small amount of precipitation occurs. Continue to add a small amount of DCM to dissolve the precipitate. Place the small bottle in a dry and ventilated place for about one week, during which the crystal was formed. The X-ray data was detected by Smart APEX II which was purchased from Bruker.

**3e:** The pure compounds (50 mg) of **3e** was dissolved in DCM in the small bottle, and then the CH<sub>3</sub>OH was added slowly until a small amount of precipitation occurs. Continue to add a small amount of DCM to dissolve the precipitate. Place the small bottle in a dry and ventilated place for about one week, during which the crystal was formed. The X-ray data was detected by Smart APEX II which was purchased from Bruker.

## 5. 2 X-ray Crystallographic Data

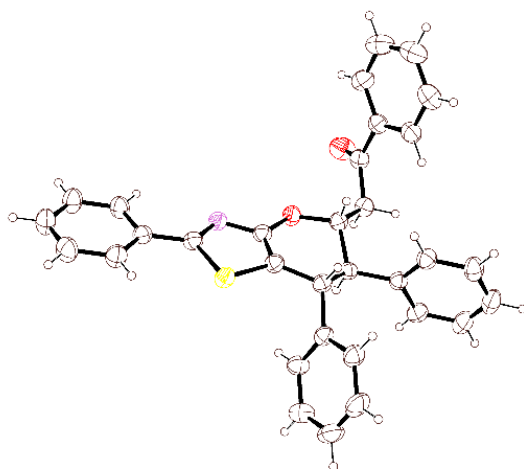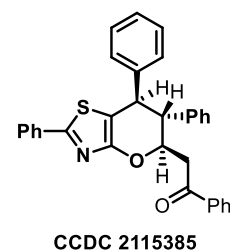

|                                                            |                                                    |                                                    |                    |
|------------------------------------------------------------|----------------------------------------------------|----------------------------------------------------|--------------------|
| Bond precision:                                            | C-C = 0.0046 Å                                     |                                                    | Wavelength=1.54184 |
| Cell:                                                      | a=11.9830(2)                                       | b=13.0537(3)                                       | c=16.2653(3)       |
|                                                            | alpha=90                                           | beta=90                                            | gamma=90           |
| Temperature:                                               | 298 K                                              |                                                    |                    |
|                                                            | Calculated                                         | Reported                                           |                    |
| Volume                                                     | 2544.26(9)                                         | 2544.27(8)                                         |                    |
| Space group                                                | P 21 21 21                                         | P 21 21 21                                         |                    |
| Hall group                                                 | P 2ac 2ab                                          | P 2ac 2ab                                          |                    |
| Moiety formula                                             | C <sub>32</sub> H <sub>25</sub> N O <sub>2</sub> S | C <sub>32</sub> H <sub>25</sub> N O <sub>2</sub> S |                    |
| Sum formula                                                | C <sub>32</sub> H <sub>25</sub> N O <sub>2</sub> S | C <sub>32</sub> H <sub>25</sub> N O <sub>2</sub> S |                    |
| Mr                                                         | 487.59                                             | 487.59                                             |                    |
| Dx, g cm <sup>-3</sup>                                     | 1.273                                              | 1.273                                              |                    |
| Z                                                          | 4                                                  | 4                                                  |                    |
| Mu (mm <sup>-1</sup> )                                     | 1.359                                              | 1.359                                              |                    |
| F000                                                       | 1024.0                                             | 1024.0                                             |                    |
| F000'                                                      | 1028.04                                            |                                                    |                    |
| h,k,lmax                                                   | 15,16,20                                           | 14,16,20                                           |                    |
| Nref                                                       | 5428[ 3057]                                        | 5047                                               |                    |
| Tmin,Tmax                                                  | 0.907,0.934                                        | 0.436,1.000                                        |                    |
| Tmin'                                                      | 0.897                                              |                                                    |                    |
| Correction method=                                         | # Reported T Limits: Tmin=0.436 Tmax=1.000         |                                                    |                    |
| AbsCorr =                                                  | MULTI-SCAN                                         |                                                    |                    |
| Data completeness=                                         | 1.65/0.93                                          | Theta(max)= 77.584                                 |                    |
| R(reflections)=                                            | 0.0374( 4304)                                      | wR2(reflections)=<br>0.1010( 5047)                 |                    |
| S =                                                        | 1.042                                              | Npar= 325                                          |                    |
| Displacement ellipsoids are drawn at 30% probability level |                                                    |                                                    |                    |



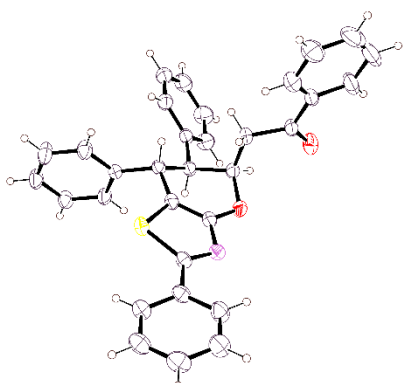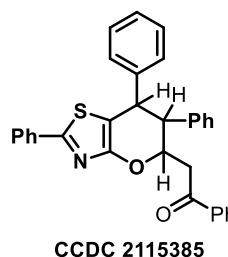

Bond precision: C-C = 0.0046 Å Wavelength=1.54184  
 Cell: a=11.9830(2) b=13.0537(3) c=16.2653(3)  
 alpha=90 beta=90 gamma=90

Temperature: 298 K

|                        | Calculated                                         | Reported                                           |
|------------------------|----------------------------------------------------|----------------------------------------------------|
| Volume                 | 2544.26(9)                                         | 2544.27(8)                                         |
| Space group            | P 21 21 21                                         | P 21 21 21                                         |
| Hall group             | P 2ac 2ab                                          | P 2ac 2ab                                          |
| Moiety formula         | C <sub>32</sub> H <sub>25</sub> N O <sub>2</sub> S | C <sub>32</sub> H <sub>25</sub> N O <sub>2</sub> S |
| Sum formula            | C <sub>32</sub> H <sub>25</sub> N O <sub>2</sub> S | C <sub>32</sub> H <sub>25</sub> N O <sub>2</sub> S |
| Mr                     | 487.59                                             | 487.59                                             |
| Dx, g cm <sup>-3</sup> | 1.273                                              | 1.273                                              |
| Z                      | 4                                                  | 4                                                  |
| Mu (mm <sup>-1</sup> ) | 1.359                                              | 1.359                                              |
| F <sub>000</sub>       | 1024.0                                             | 1024.0                                             |
| F <sub>000</sub> '     | 1028.04                                            |                                                    |
| h,k,lmax               | 15,16,20                                           | 14,16,20                                           |
| Nref                   | 5428[ 3057]                                        | 5047                                               |
| Tmin,Tmax              | 0.907,0.934                                        | 0.436,1.000                                        |
| Tmin'                  | 0.897                                              |                                                    |

Correction method= # Reported T Limits: Tmin=0.436 Tmax=1.000

AbsCorr = MULTI-SCAN

Data completeness= 1.65/0.93 Theta(max)= 77.584

R(reflections)= 0.0374( 4304) wR2(reflections)=  
0.1010( 5047)

S = 1.042 Npar= 325

Displacement ellipsoids are drawn at 30% probability level

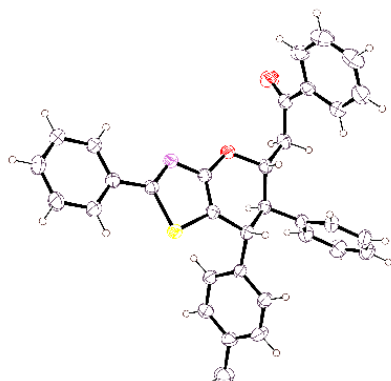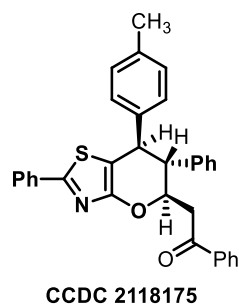

|                                                                         |                                                    |                                                    |
|-------------------------------------------------------------------------|----------------------------------------------------|----------------------------------------------------|
| Bond precision:                                                         | C-C = 0.0041 Å                                     | Wavelength=1.54184                                 |
| Cell:                                                                   | a=12.0118(2)      b=12.7811(2)      c=16.9520(3)   |                                                    |
|                                                                         | alpha=90            beta=90            gamma=90    |                                                    |
| Temperature: 303 K                                                      |                                                    |                                                    |
|                                                                         | Calculated                                         | Reported                                           |
| Volume                                                                  | 2602.54(8)                                         | 2602.54(8)                                         |
| Space group                                                             | P 21 21 21                                         | P 21 21 21                                         |
| Hall group                                                              | P 2ac 2ab                                          | P 2ac 2ab                                          |
| Moiety formula                                                          | C <sub>33</sub> H <sub>27</sub> N O <sub>2</sub> S | C <sub>33</sub> H <sub>27</sub> N O <sub>2</sub> S |
| Sum formula                                                             | C <sub>33</sub> H <sub>27</sub> N O <sub>2</sub> S | C <sub>33</sub> H <sub>27</sub> N O <sub>2</sub> S |
| Mr                                                                      | 501.62                                             | 501.61                                             |
| Dx, g cm <sup>-3</sup>                                                  | 1.280                                              | 1.280                                              |
| Z                                                                       | 4                                                  | 4                                                  |
| Mu (mm <sup>-1</sup> )                                                  | 1.343                                              | 1.343                                              |
| F <sub>000</sub>                                                        | 1056.0                                             | 1056.0                                             |
| F <sub>000</sub> '                                                      | 1060.11                                            |                                                    |
| h,k,lmax                                                                | 15,16,21                                           | 14,15,21                                           |
| Nref                                                                    | 5435[ 3062]                                        | 4657                                               |
| Tmin,Tmax                                                               | 0.886,0.935                                        | 0.099,1.000                                        |
| Tmin'                                                                   | 0.886                                              |                                                    |
| Correction method= # Reported T Limits: Tmin=0.099 Tmax=1.000 AbsCorr = |                                                    |                                                    |
| MULTI-SCAN                                                              |                                                    |                                                    |
| Data completeness= 1.52/0.86                                            | Theta(max)= 75.994                                 |                                                    |
| R(reflections)= 0.0344( 4158)                                           | wR2(reflections)= 0.0895( 4657)                    |                                                    |
| S = 1.007                                                               | Npar= 336                                          |                                                    |
| Displacement ellipsoids are drawn at 30% probability level              |                                                    |                                                    |

## 6 The Discussion and Determination of Absolute Configuration of Compound 3a<sub>2</sub> and Some Mechanism Verification Experiment

### 6.1 The Discussion and Determination of Absolute Configuration of Compound 3a<sub>2</sub>

3a<sup>1</sup> and 3a<sup>2</sup> was a pair of enantiomers, The decision configuration of 3a<sup>1</sup> is determined by X-ray crystal, while the relative configuration of 3a<sup>2</sup> is determined by X-ray crystal. Both compounds are attacked by the same *re* face, and the same three-dimensional configuration is obtained by one attack. Therefore, the absolute configuration of 3a<sup>2</sup> can be determined. At the same time, it can also be determined that such substrate diastereomers produce in catalysts controlling unsaturated carbonyl compounds to produce dienolte.

### 6.2 some mechanism verification experiment

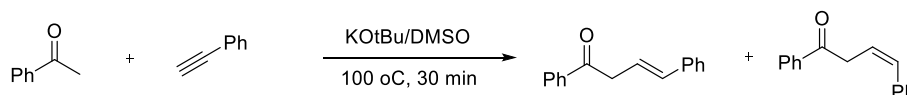

We isolated the 0.5 mmol Z-alkene (in 20 mmol scale reaction) from the mixture of the corresponding acetophenone, phenylacetylene and KOtBu in DMSO. The by-products in the system were identified as Z-alkenes by NMR.

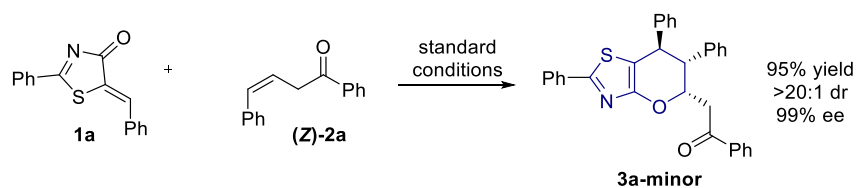

We placed Z- $\beta$ ,  $\gamma$ -unsaturated ketone (**Z**)-**2a** (1.25eq) and 5-alkenylthiazolone **1a** under optimal reaction conditions (0.1mmol, 10 mol% cat A, 0 °C), the minor product of **3a** in the template reaction was obtained with good results (95% yield, >20:1 dr, 99% ee). Therefore, this results are consistent with the postulate mechanism in Figure 1 of manuscript.

## 7 HPLC and NMR Spectrogram

<sup>1</sup>HNMR of **3a** (400M, CDCl<sub>3</sub>)

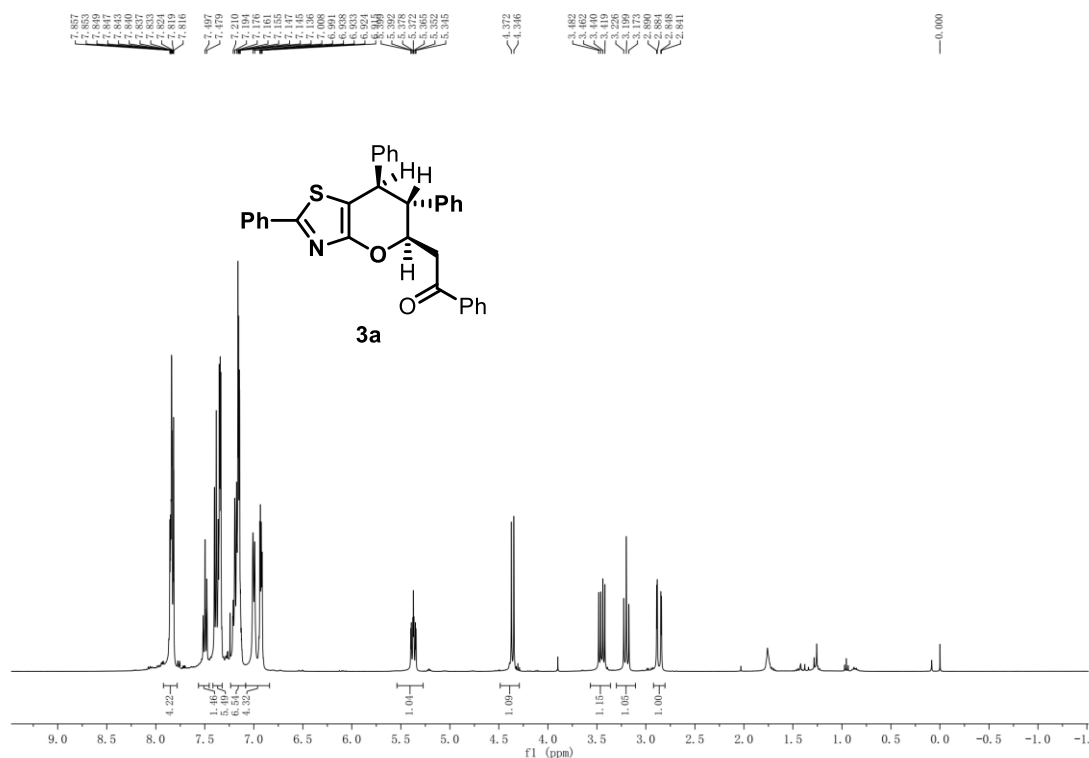

Crude <sup>1</sup>HNMR of **3a** (400M, CDCl<sub>3</sub>)

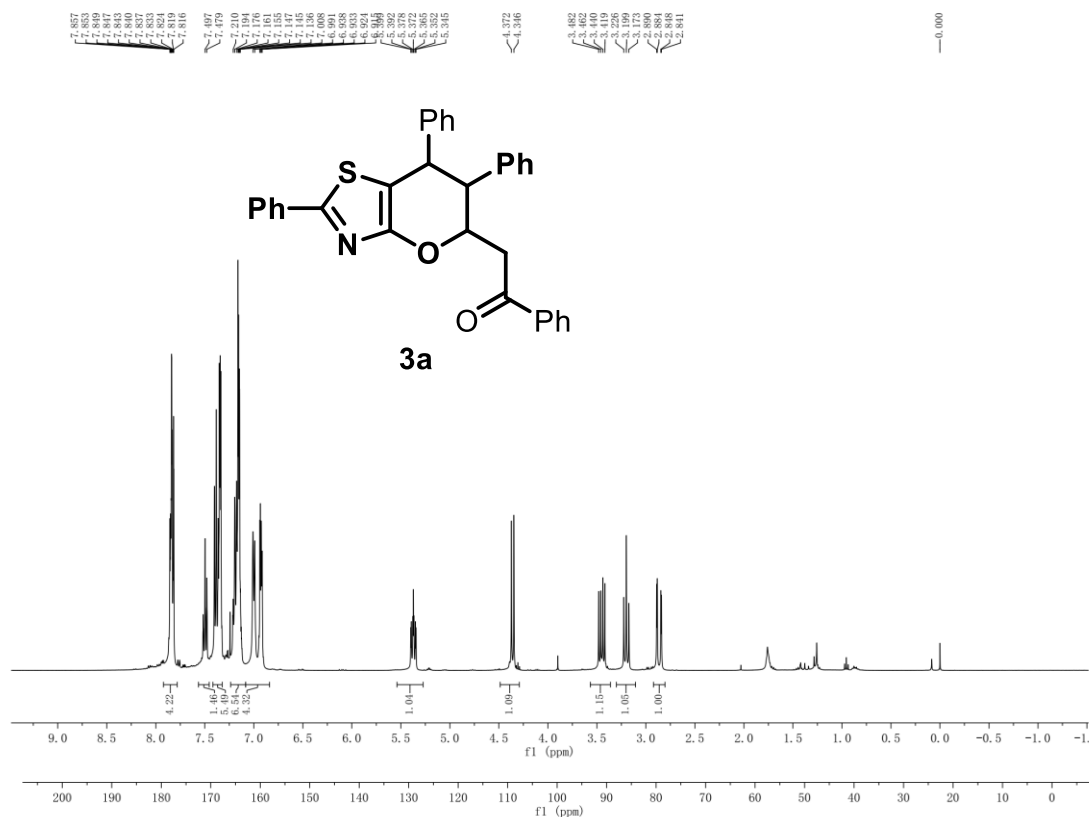

<sup>13</sup>CNMR of **3a** (101M, CDCl<sub>3</sub>)

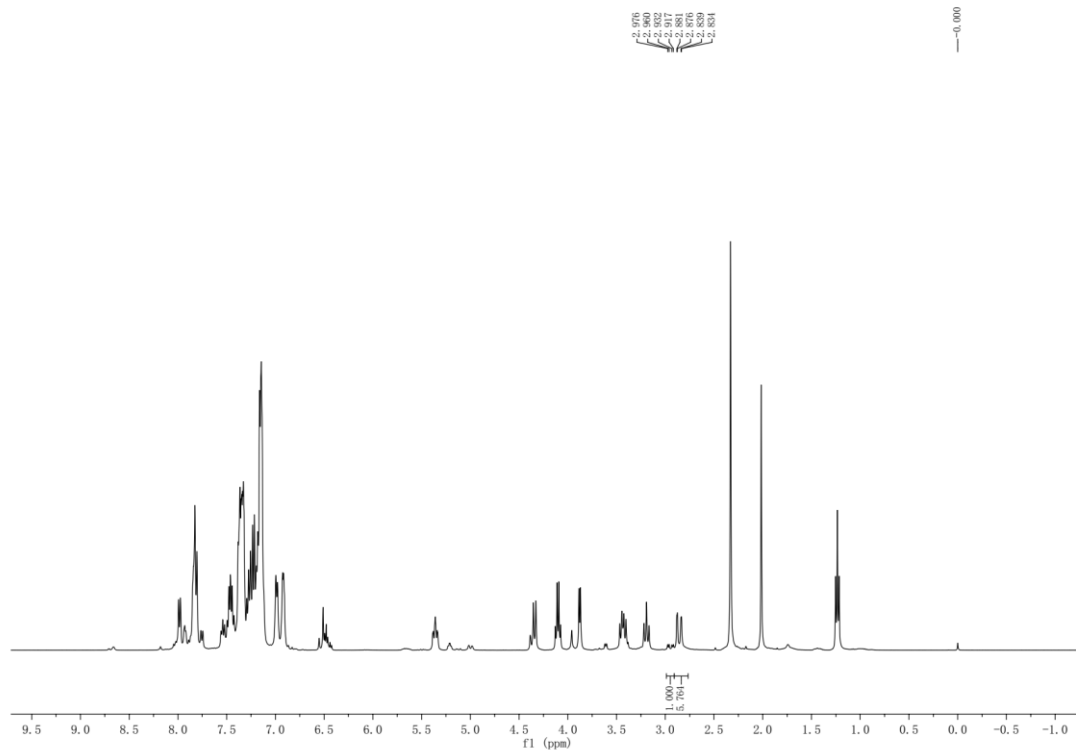

$^1\text{H}$ NMR of **3b** (400M,  $\text{CDCl}_3$ )

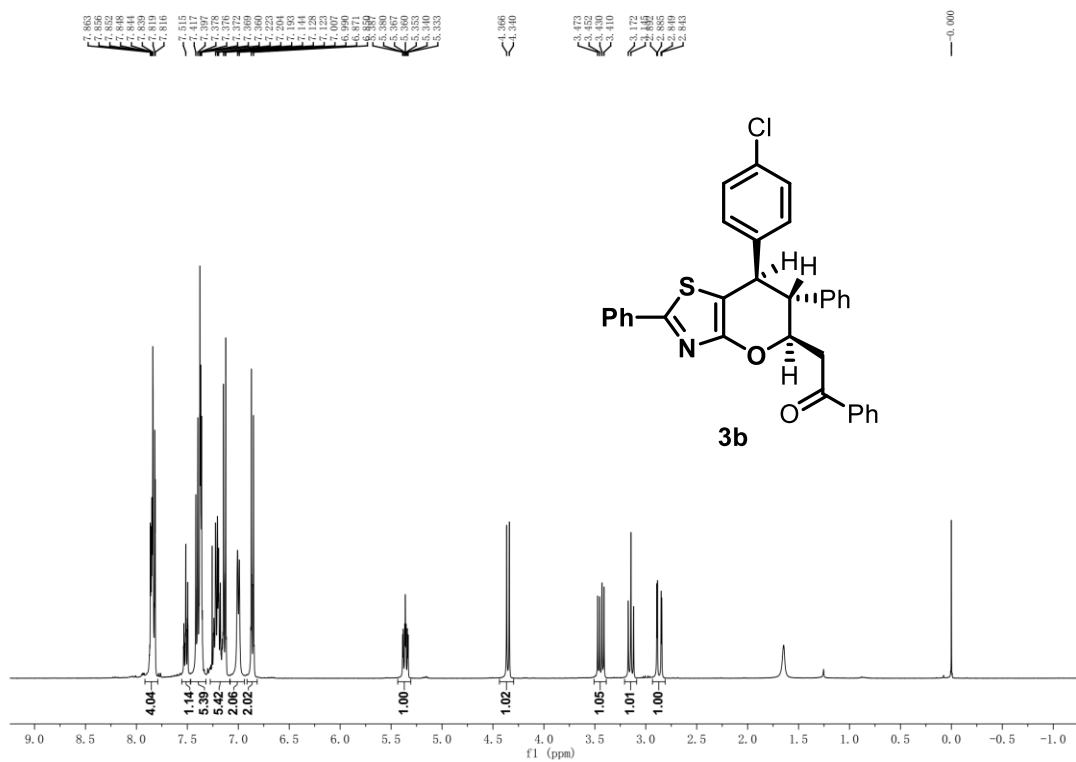

Crude  $^1\text{H}$ NMR of **3b** (400M,  $\text{CDCl}_3$ )

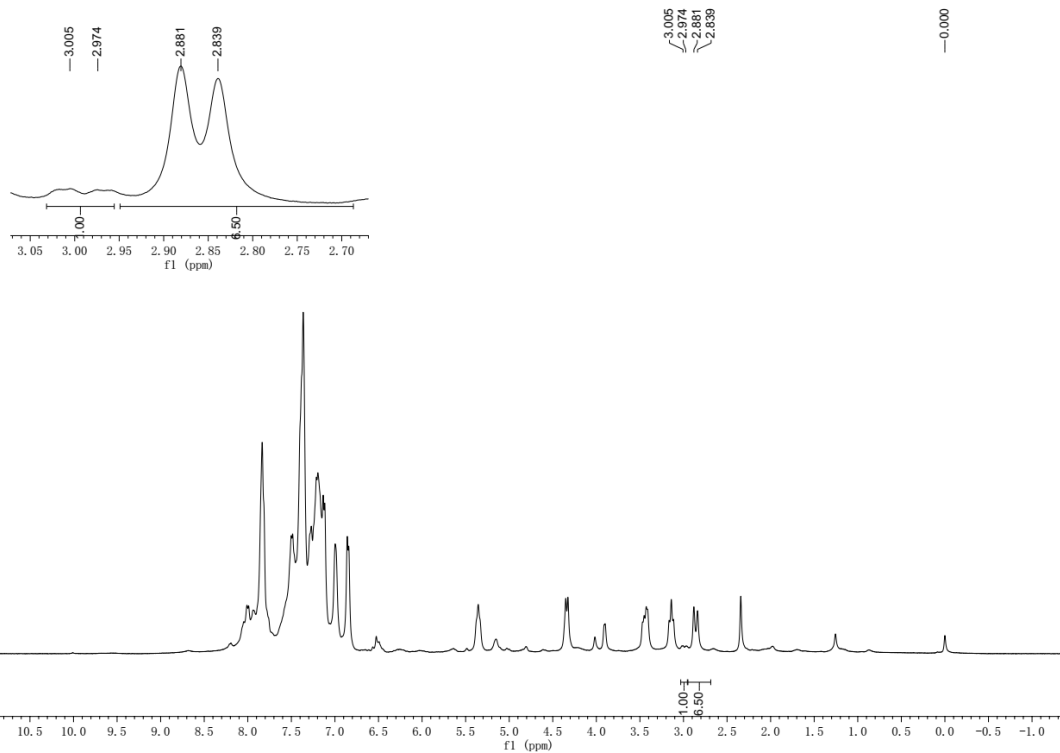

<sup>13</sup>CNMR of **3b** (101M, CDCl<sub>3</sub>)

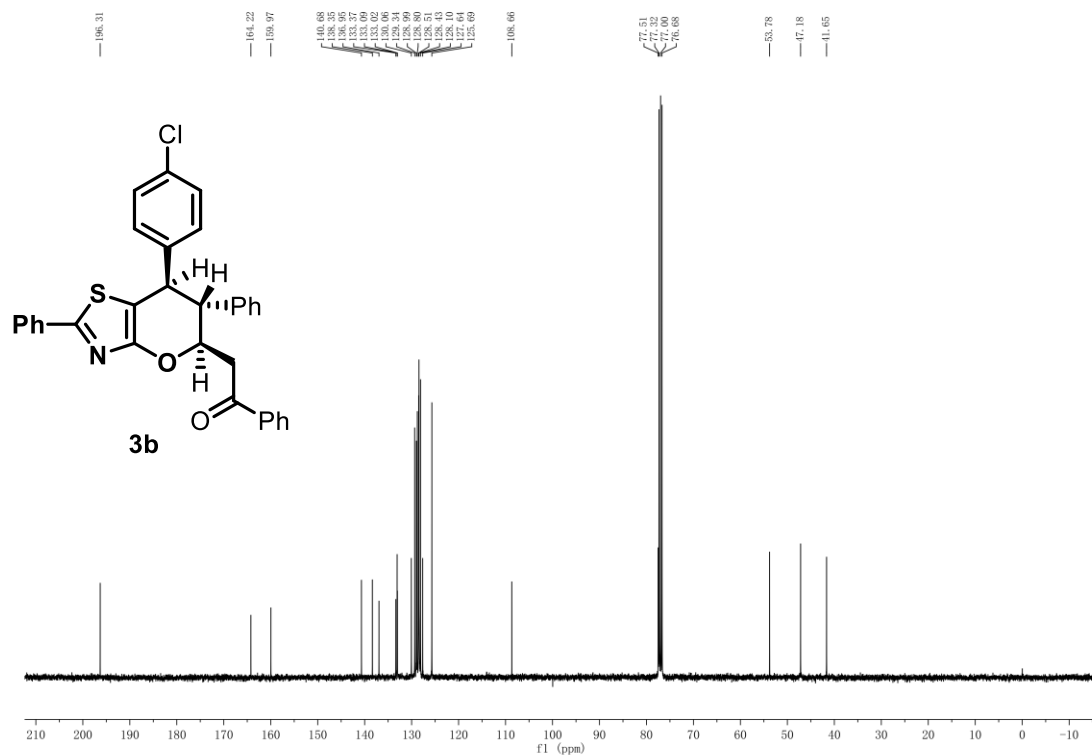

$^1\text{H}$ NMR of **3c** (400M,  $\text{CDCl}_3$ )

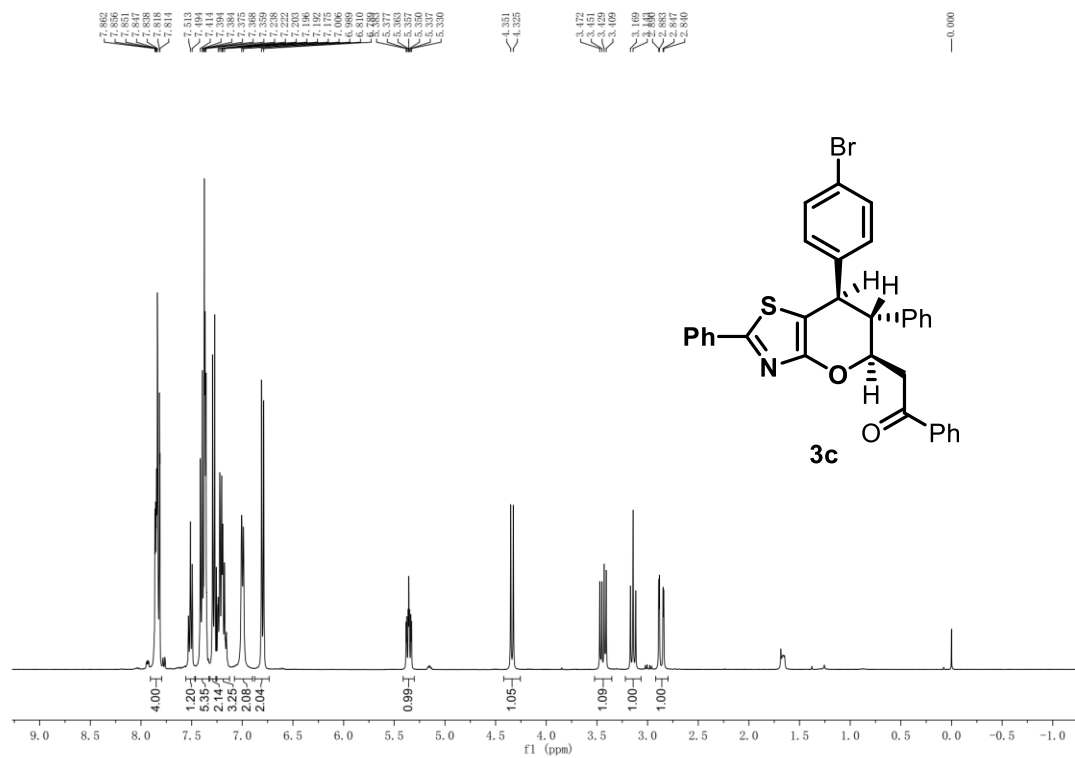

Crude  $^1\text{H}$ NMR of **3c** (400M,  $\text{CDCl}_3$ )

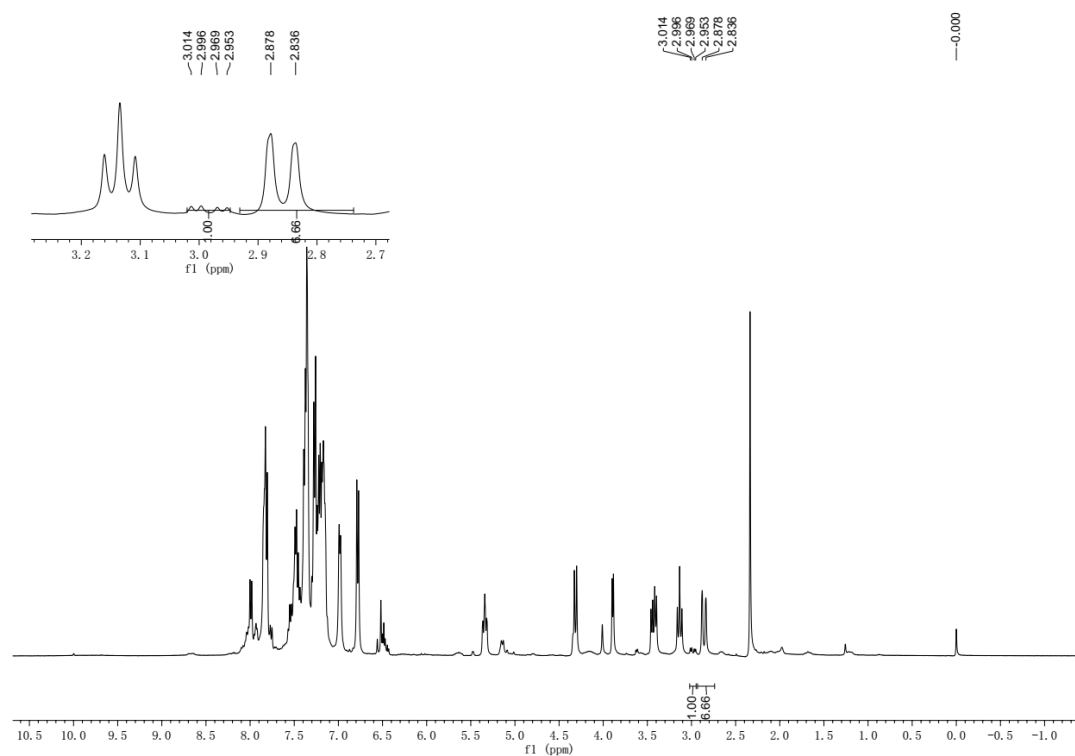

$^{13}\text{C}$ NMR of **3c** (101M,  $\text{CDCl}_3$ )

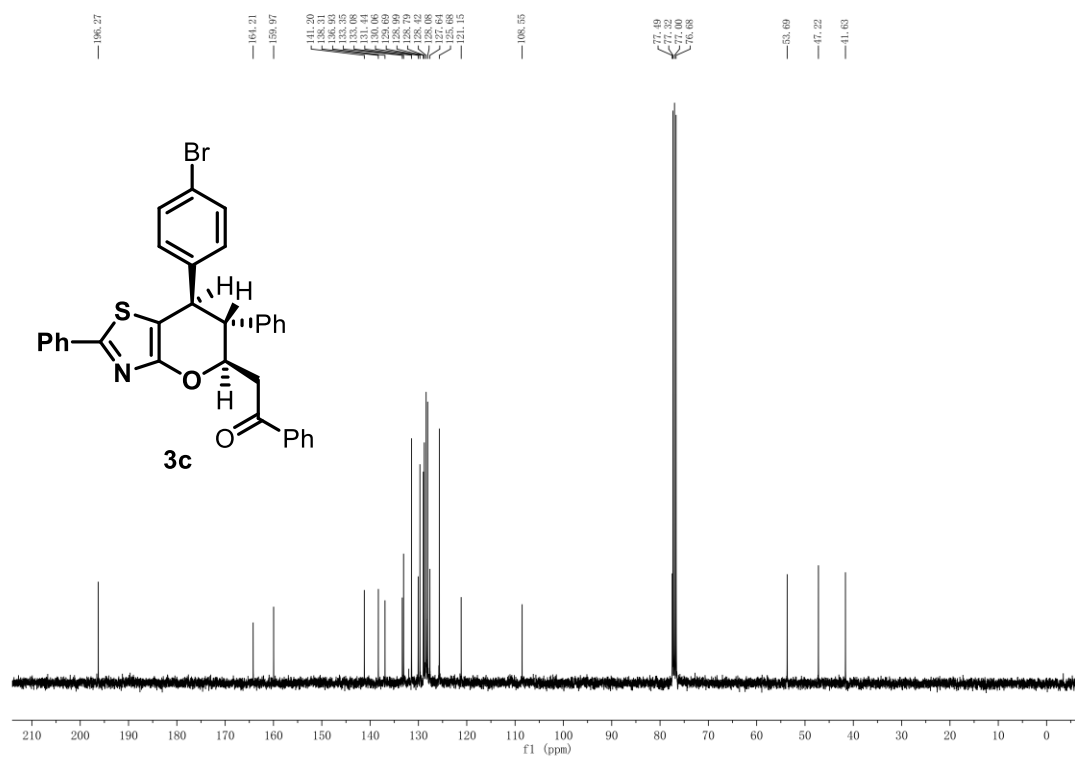



$^1\text{H}$ NMR of **3d** (400M,  $\text{CDCl}_3$ )

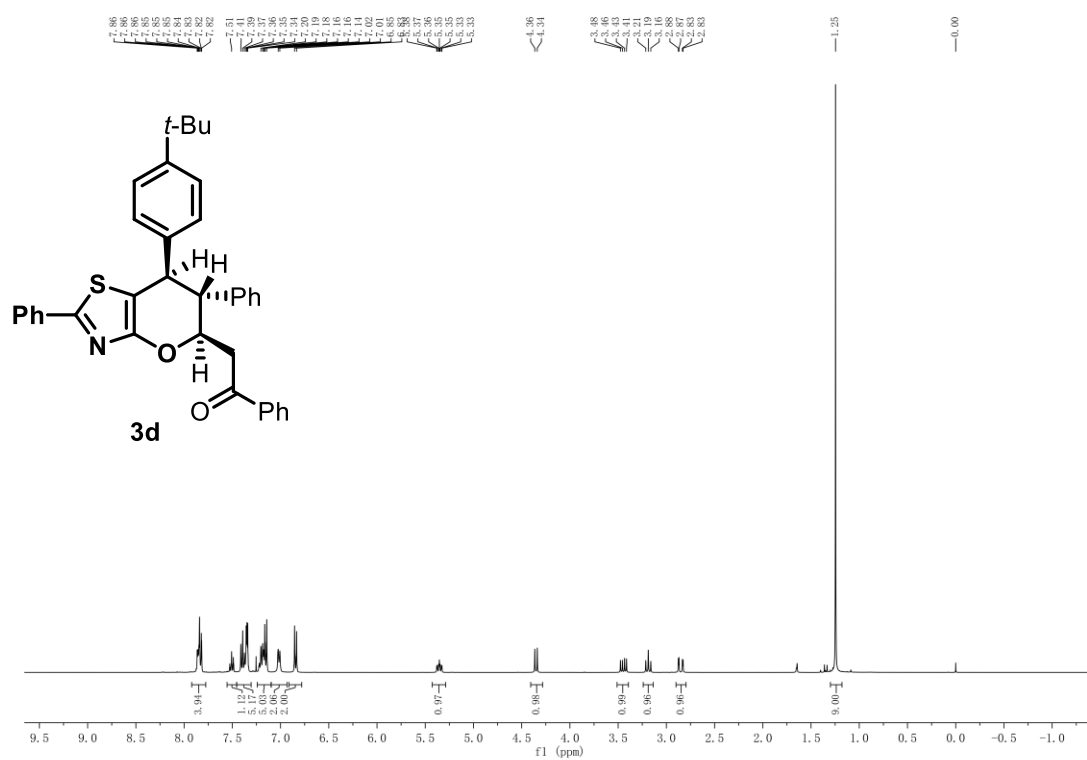

Crude  $^1\text{H}$ NMR of **3d** (400M,  $\text{CDCl}_3$ )

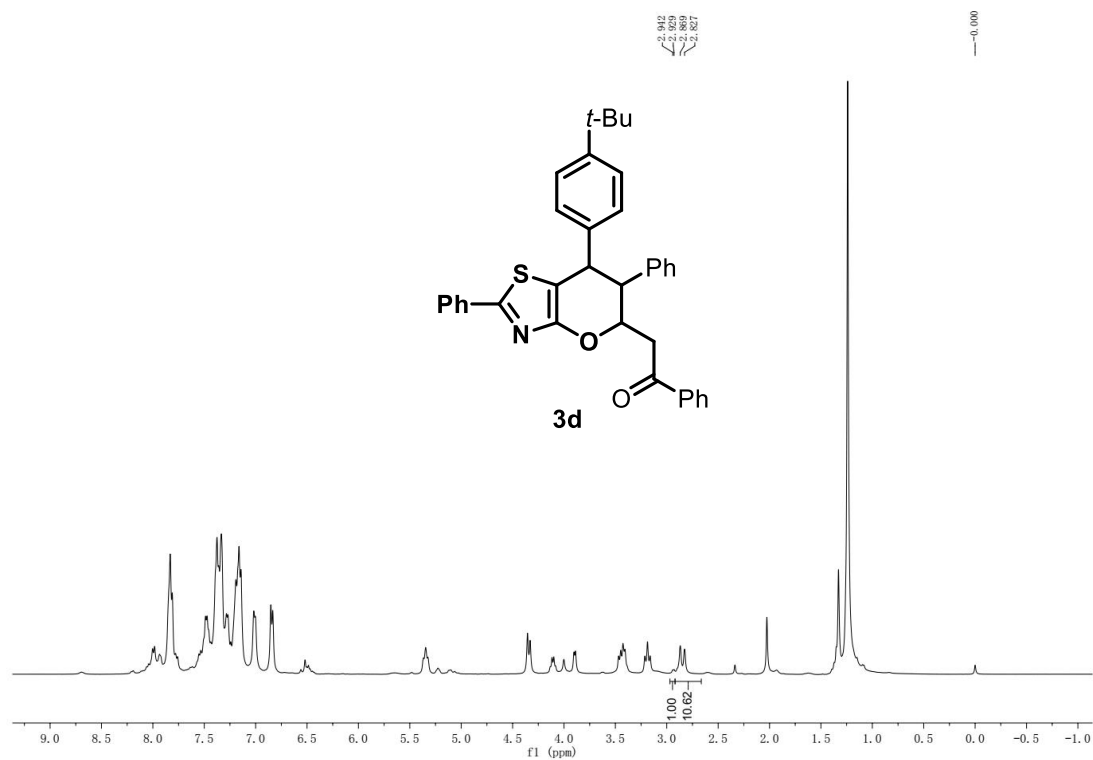

$^{13}\text{C}$ NMR of **3d** (101M,  $\text{CDCl}_3$ )

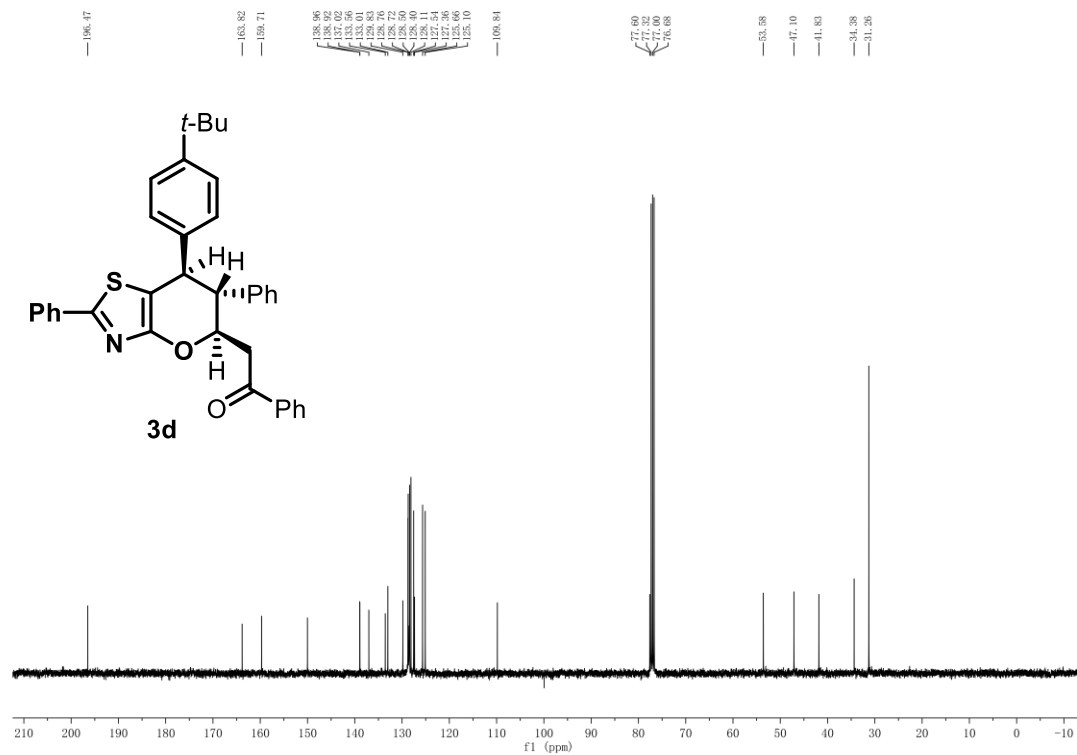

$^1\text{H}$ NMR of **3e** (400M,  $\text{CDCl}_3$ )

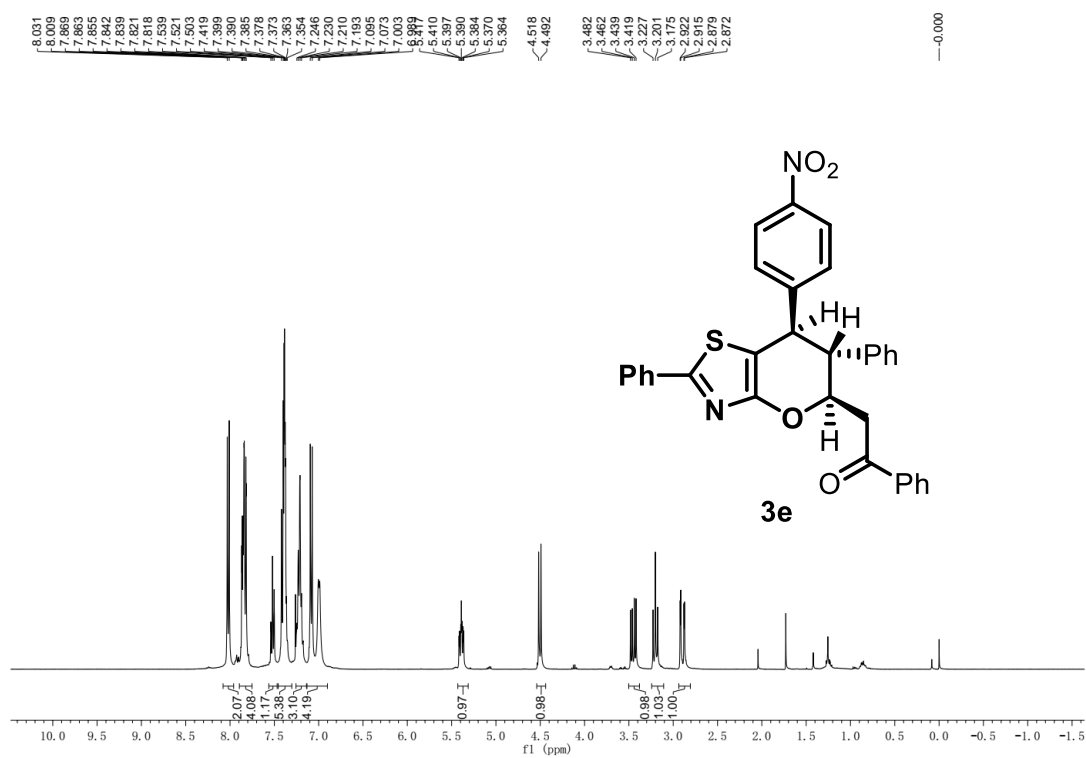

Crude  $^1\text{H}$ NMR of **3e** (400M,  $\text{CDCl}_3$ )

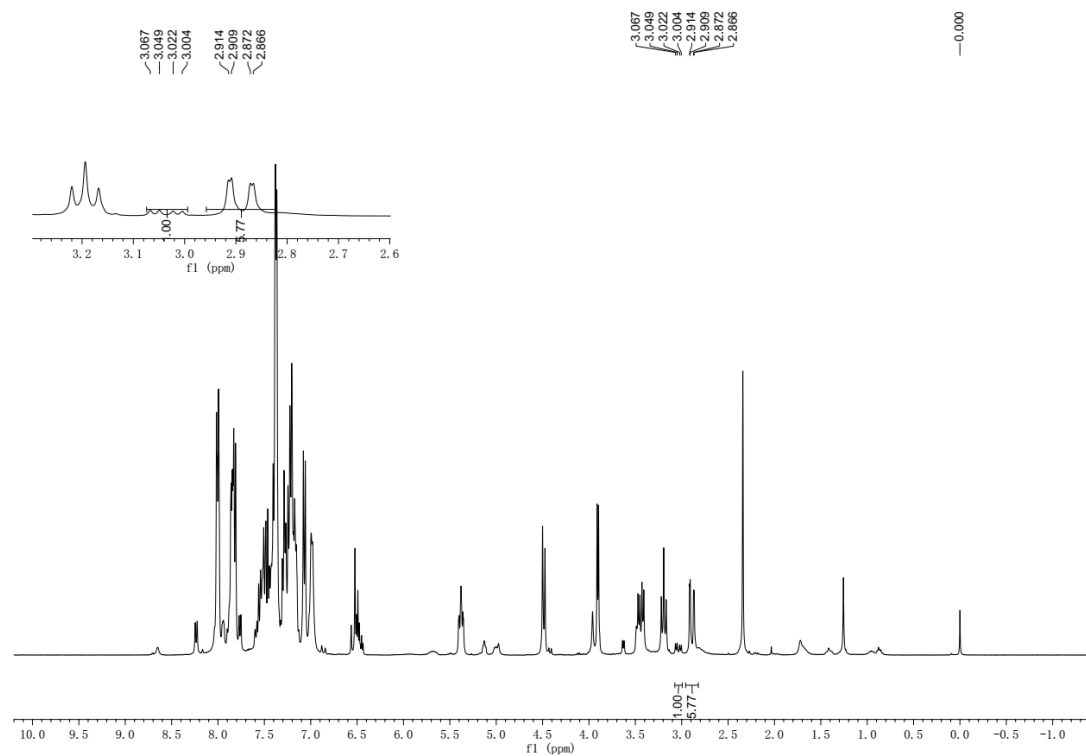

<sup>13</sup>CNMR of **3e** (101M, CDCl<sub>3</sub>)

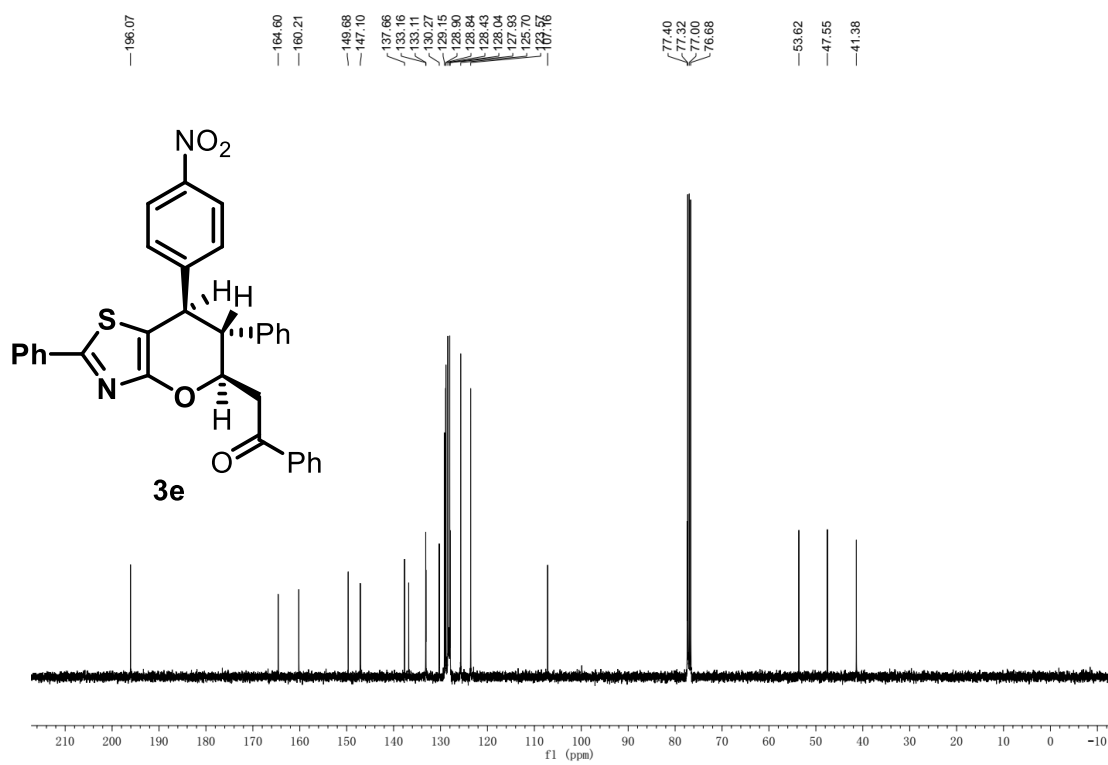

<sup>1</sup>HNMR of **3f** (400M, CDCl<sub>3</sub>)

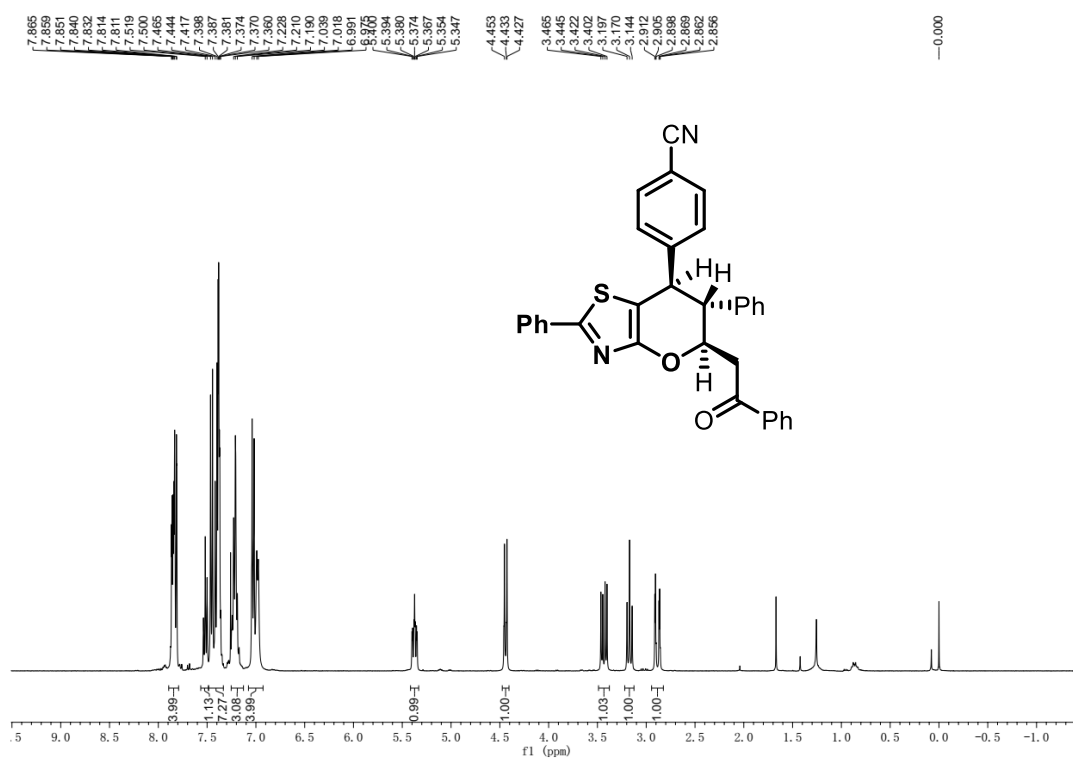

Crude <sup>1</sup>HNMR of **3f** (400M, CDCl<sub>3</sub>)

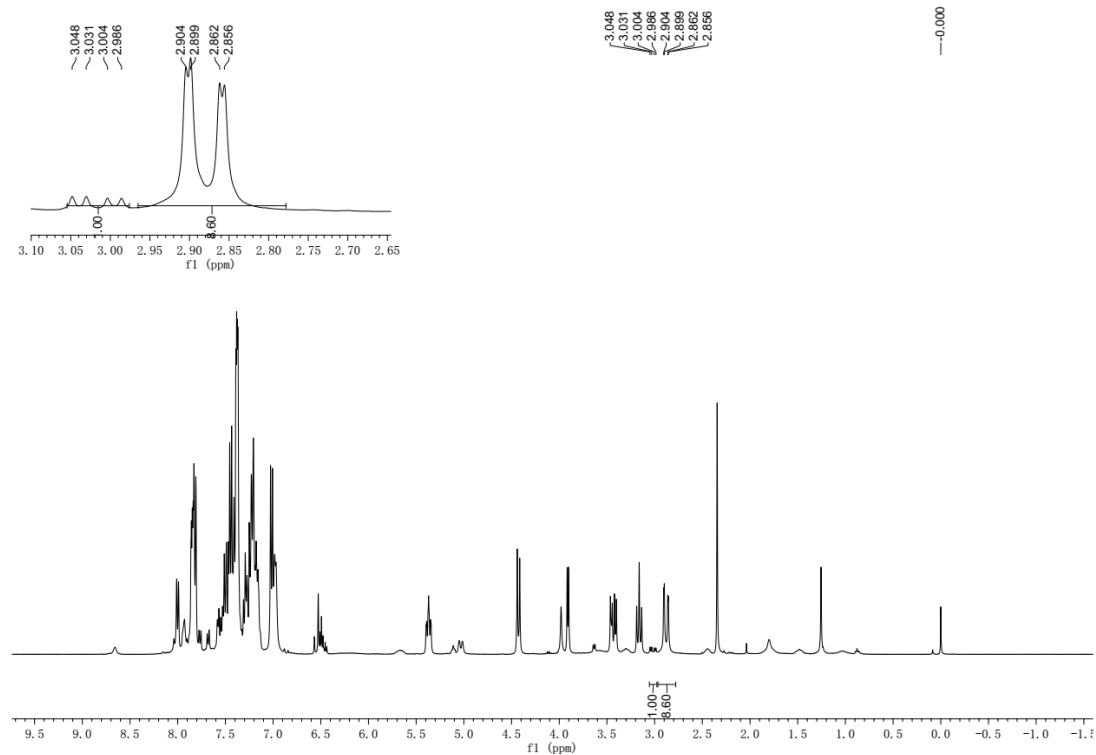

<sup>13</sup>CNMR of **3f** (101M, CDCl<sub>3</sub>)

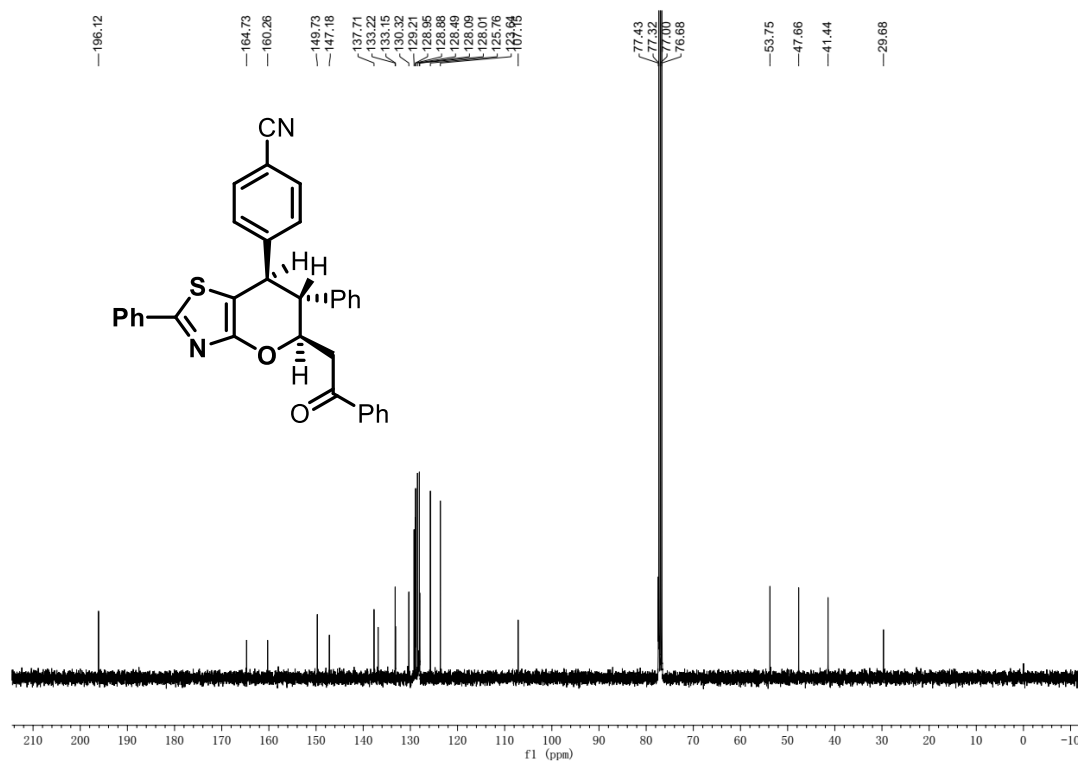

$^1\text{H}$ NMR of **3g** (400M,  $\text{CDCl}_3$ )

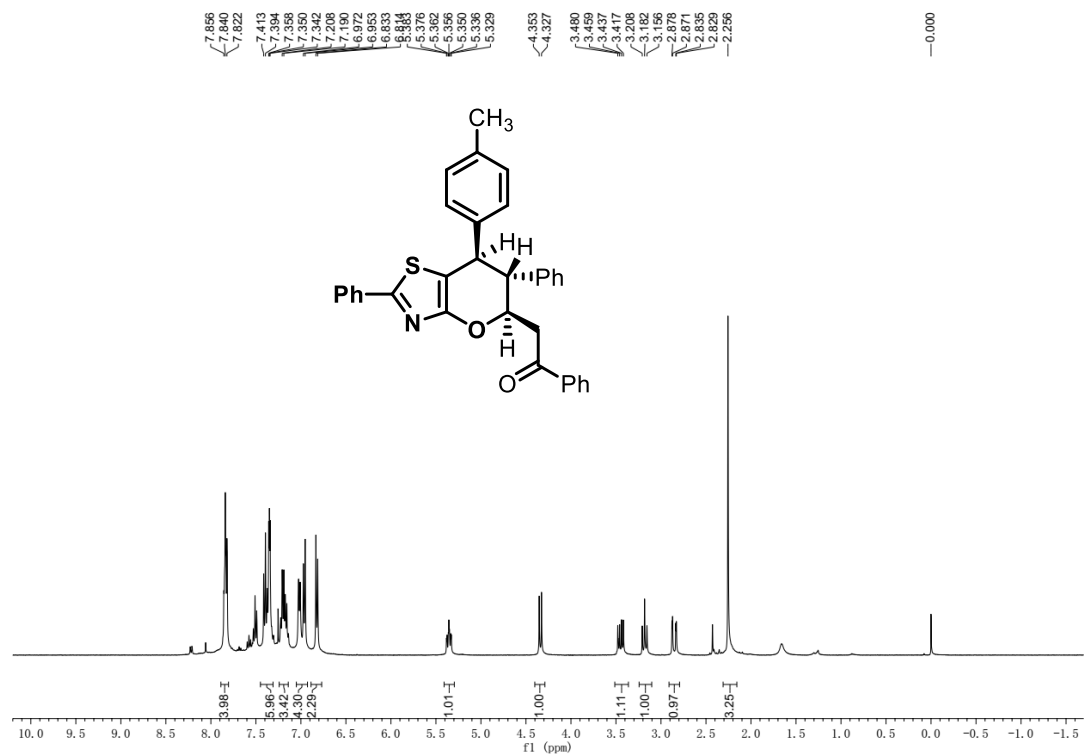

Crude  $^1\text{H}$ NMR of **3g** (400M,  $\text{CDCl}_3$ )

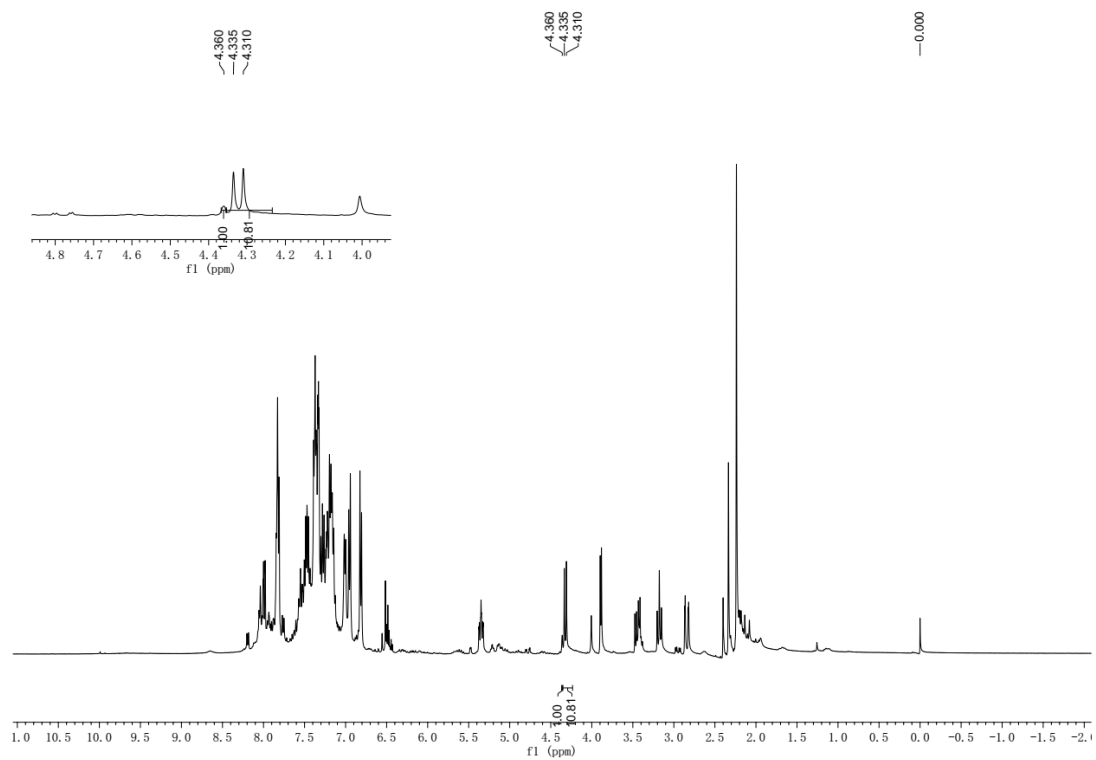

<sup>13</sup>CNMR of **3g** (101M, CDCl<sub>3</sub>)

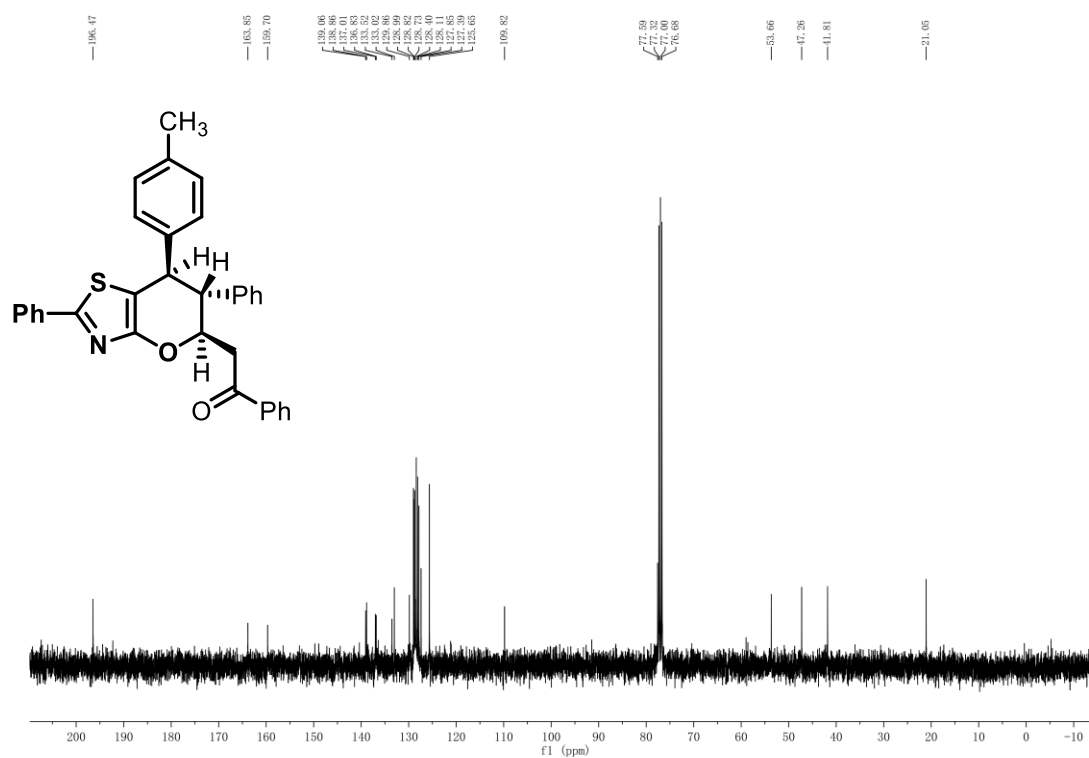



<sup>1</sup>HNMR of **3h** (400M, CDCl<sub>3</sub>)

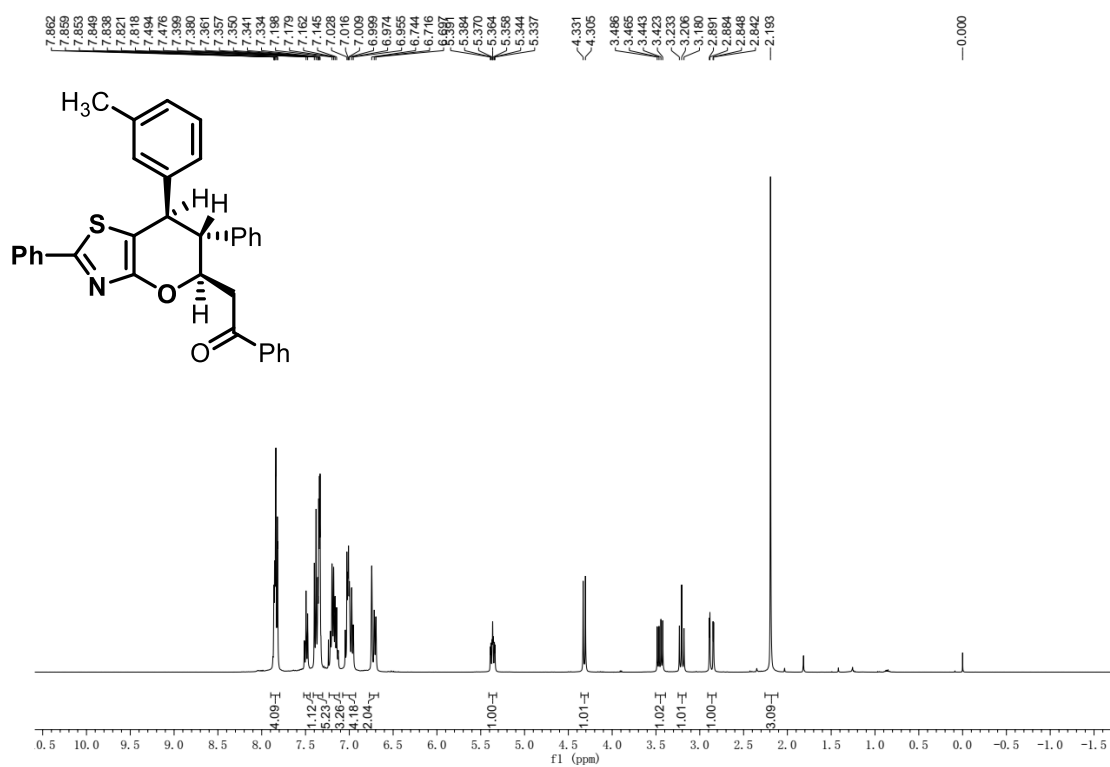

Crude <sup>1</sup>HNMR of **3h** (400M, CDCl<sub>3</sub>)

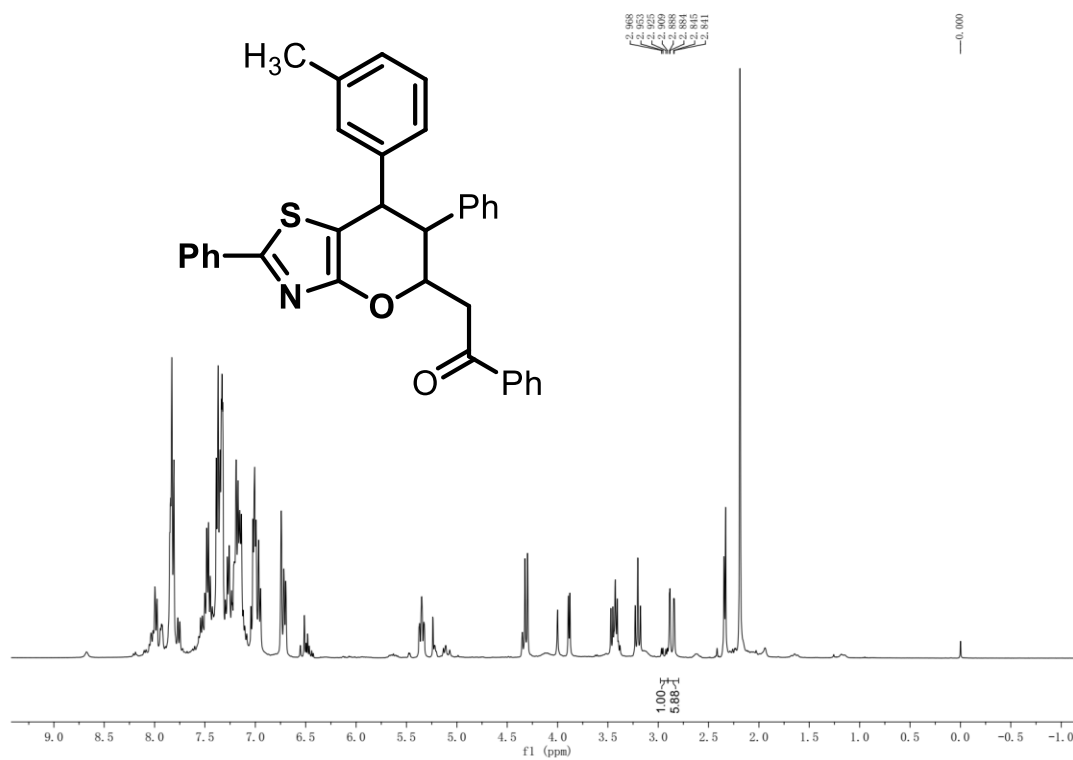

$^{13}\text{C}$ NMR of **3h** (101M,  $\text{CDCl}_3$ )

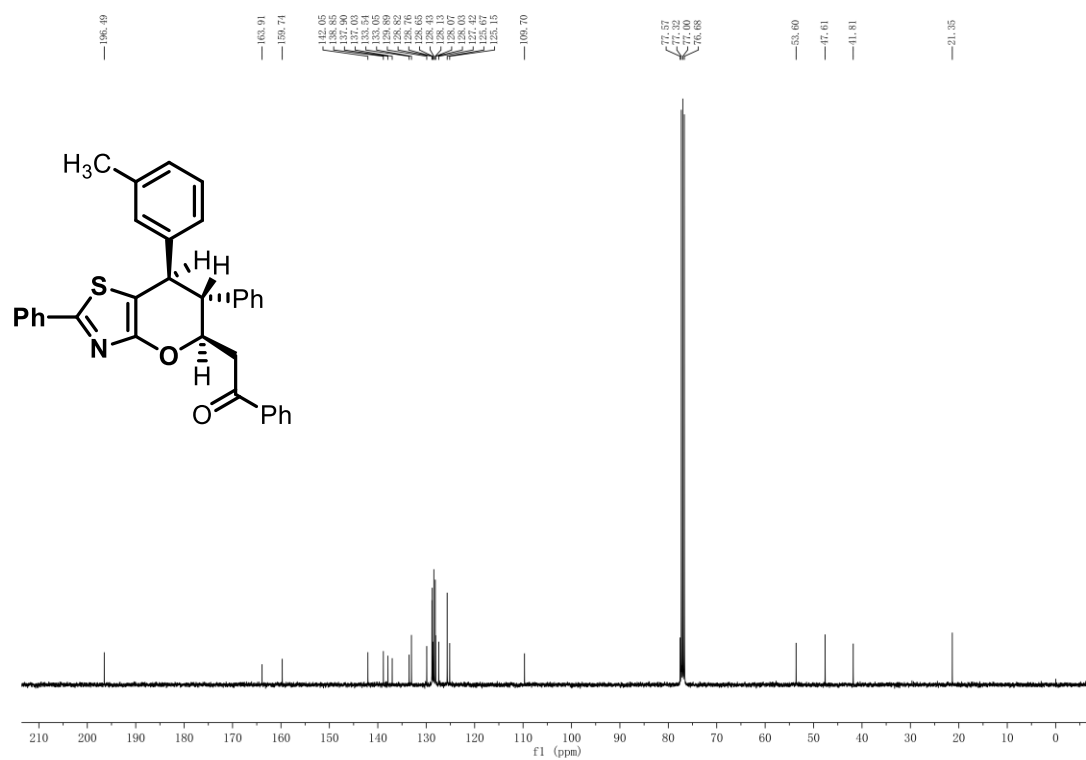

<sup>1</sup>HNMR of **3i** (400M, CDCl<sub>3</sub>)

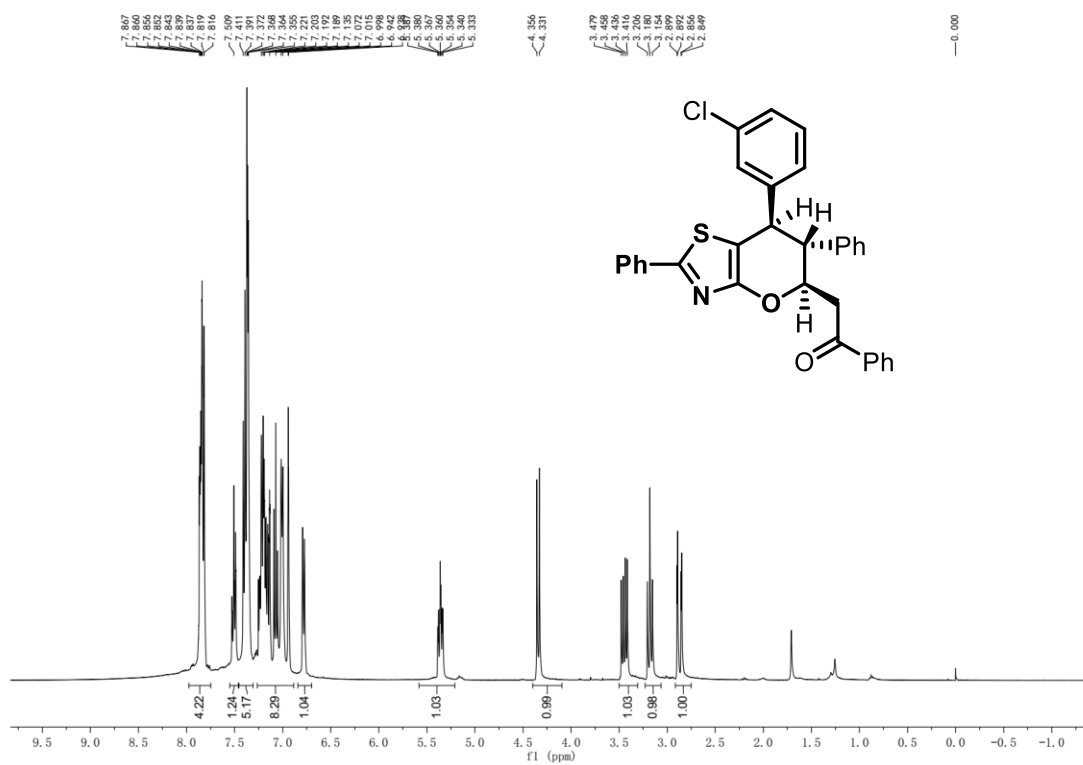

Crude <sup>1</sup>HNMR of **3i** (400M, CDCl<sub>3</sub>)

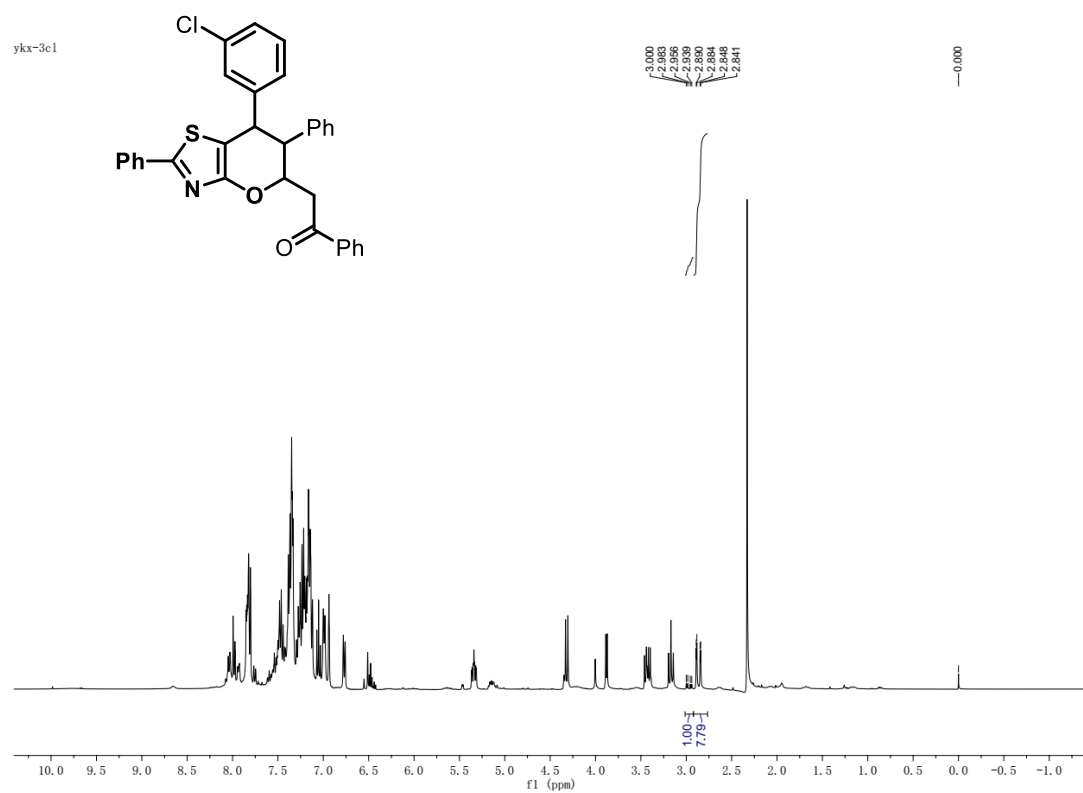

$^{13}\text{C}$ NMR of **3i** (101M,  $\text{CDCl}_3$ )

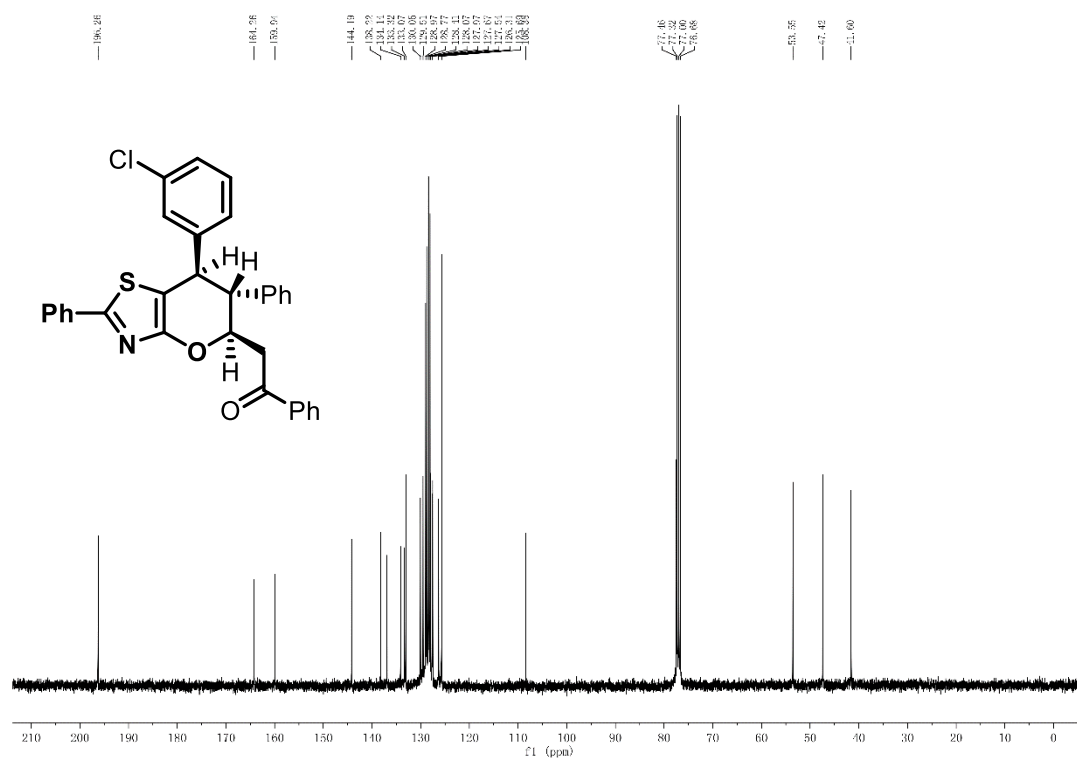

$^1\text{H}$ NMR of **3j** (400M,  $\text{CDCl}_3$ )

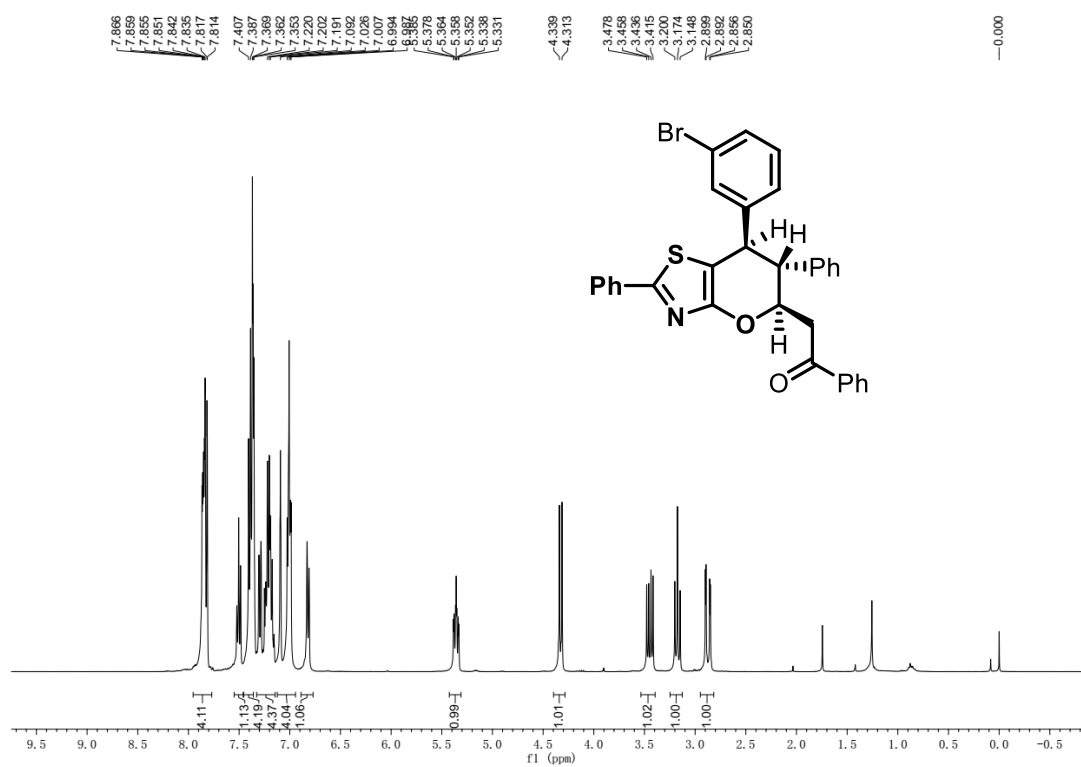

Crude  $^1\text{H}$ NMR of **3j** (400M,  $\text{CDCl}_3$ )

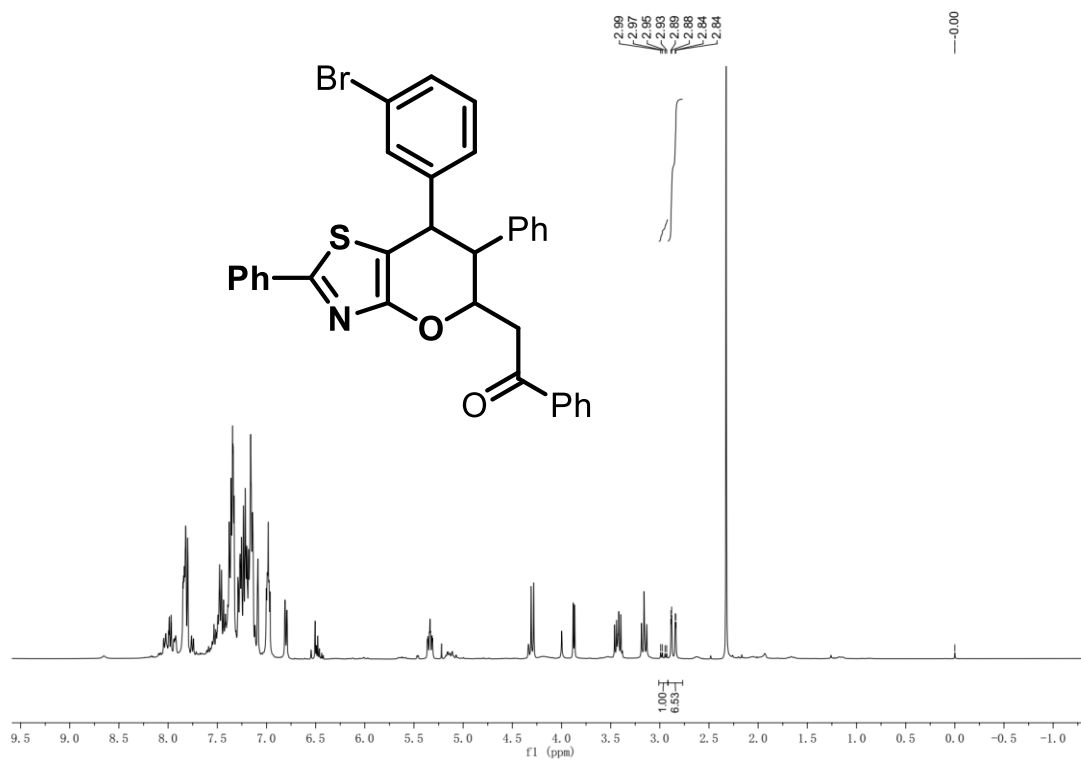

<sup>13</sup>CNMR of **3j** (101M, CDCl<sub>3</sub>)

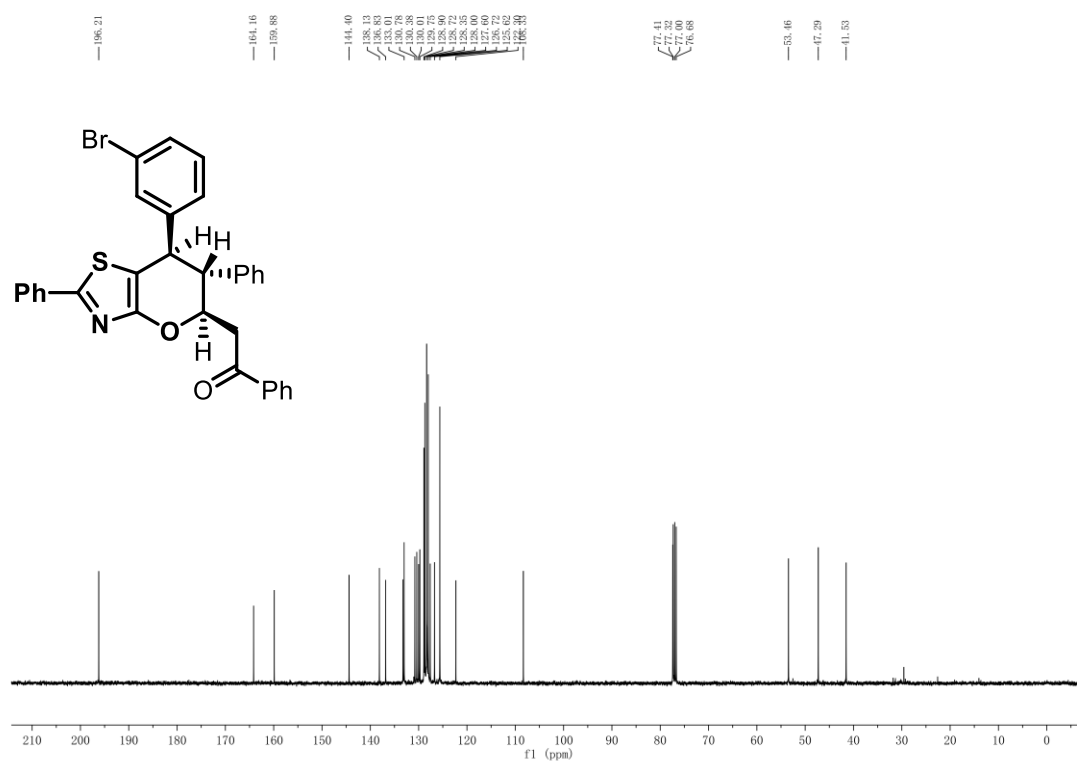

$^1\text{H NMR}$  of **3k** (400M,  $\text{CDCl}_3$ )

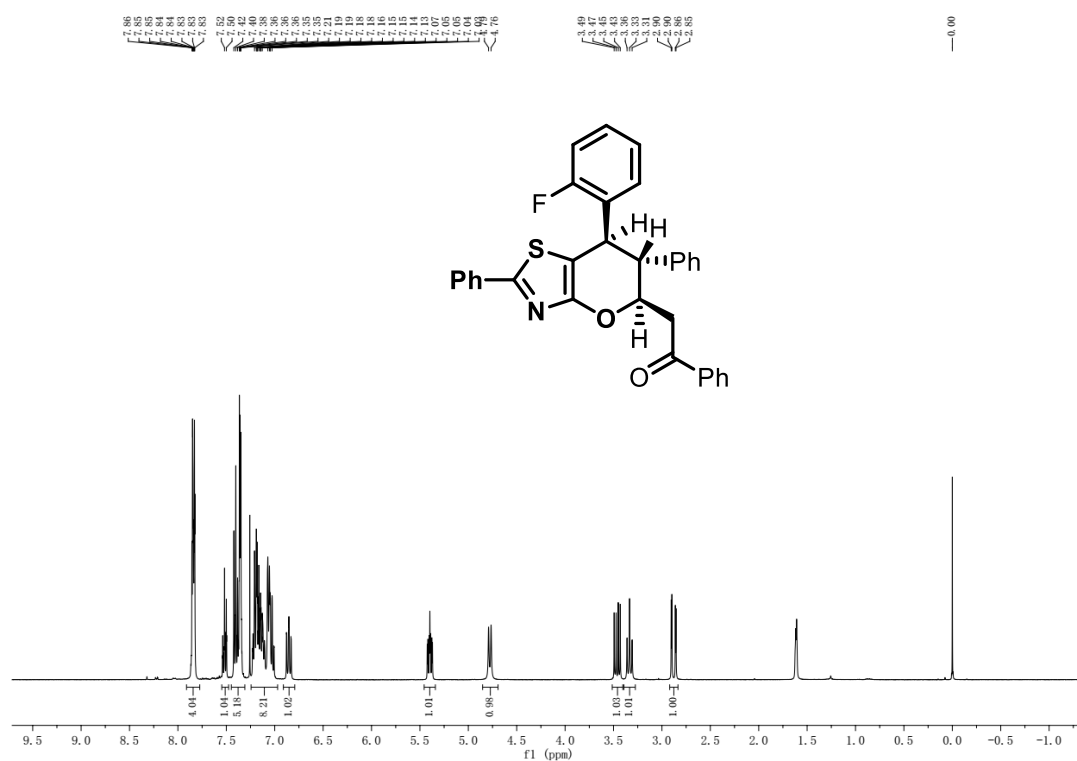

Crude  $^1\text{H NMR}$  of **3k** (400M,  $\text{CDCl}_3$ )

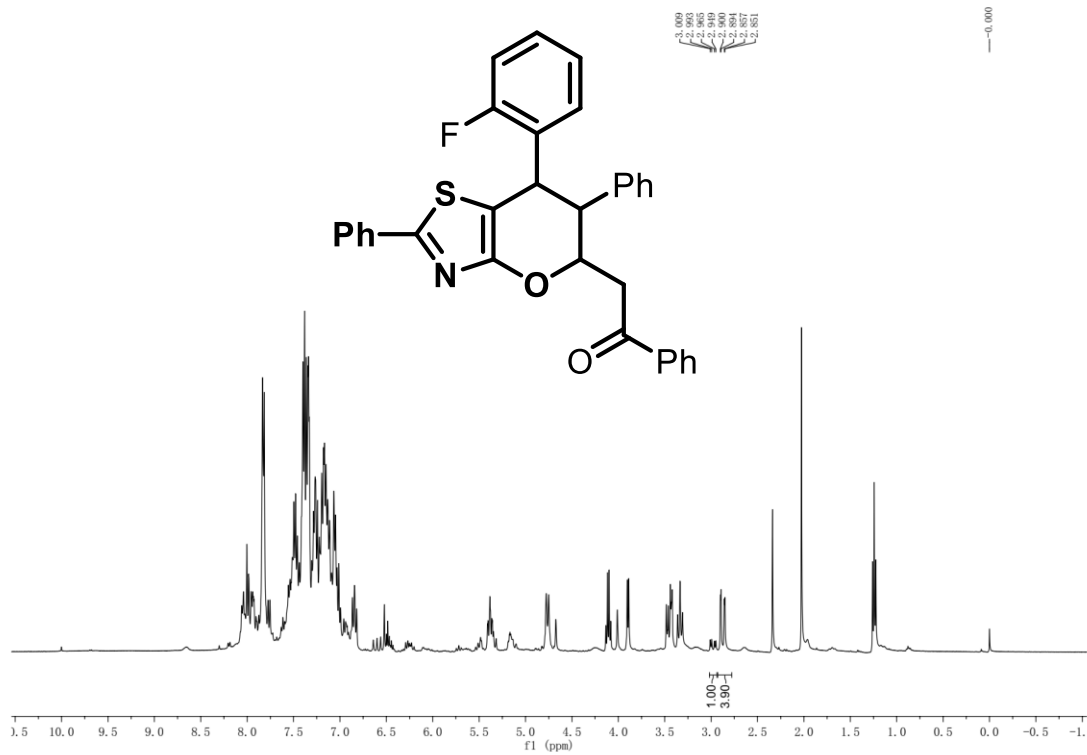

<sup>19</sup>F NMR of **3k** (400M, CDCl<sub>3</sub>)

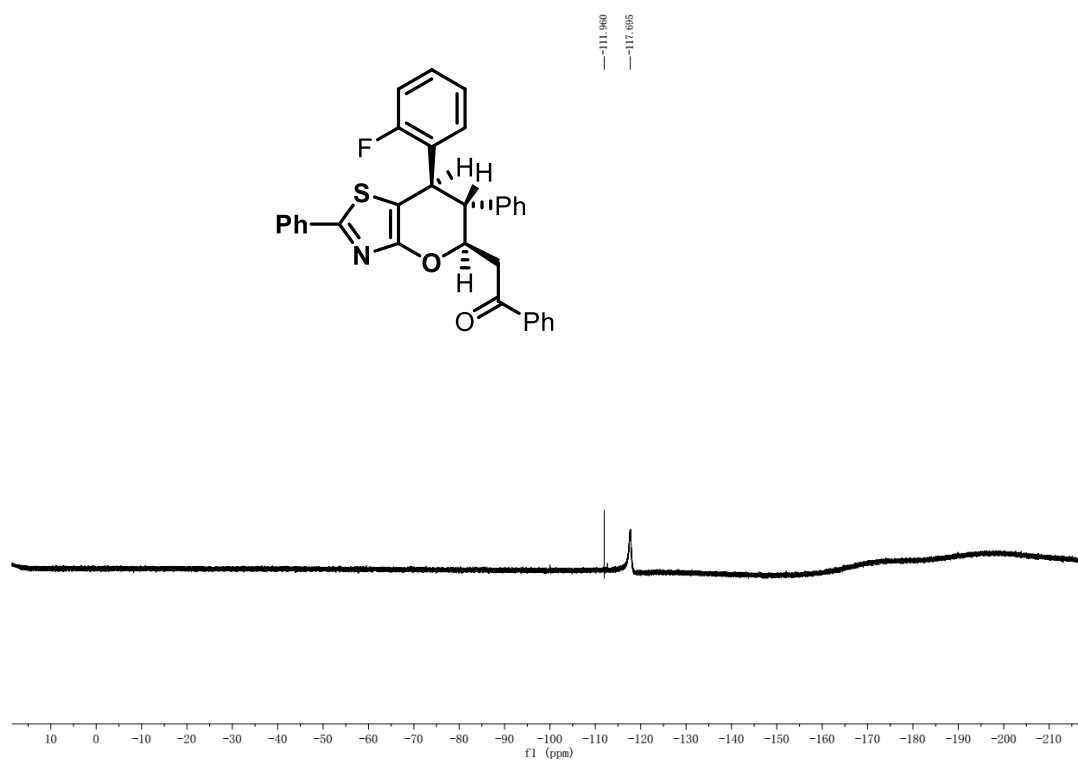

<sup>13</sup>C NMR of **3k** (101M, CDCl<sub>3</sub>)

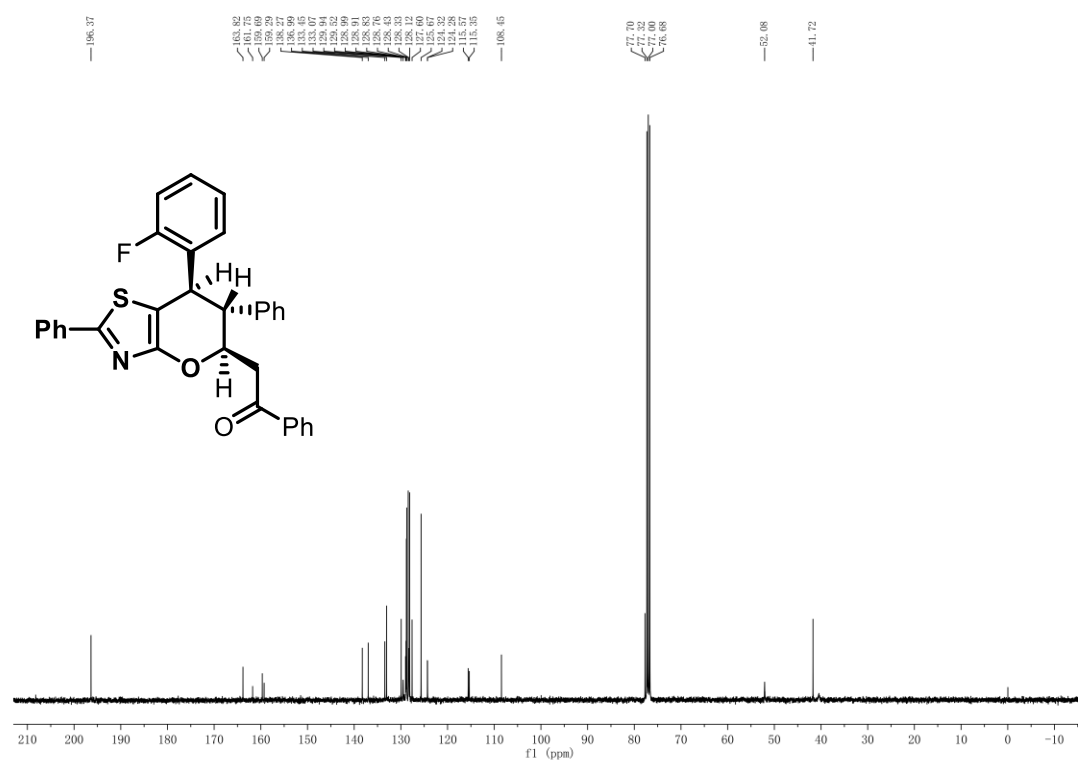



<sup>1</sup>HNMR of **31** (400M, CDCl<sub>3</sub>)

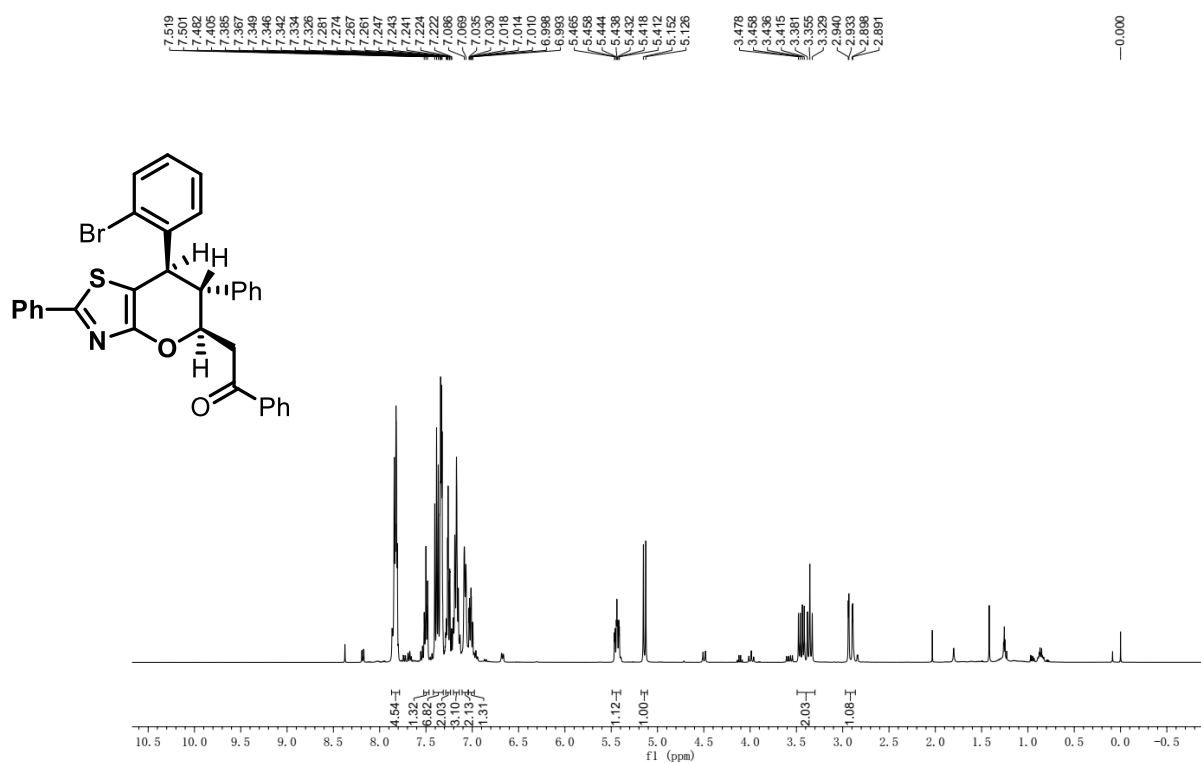

Crude <sup>1</sup>HNMR of **31** (400M, CDCl<sub>3</sub>)

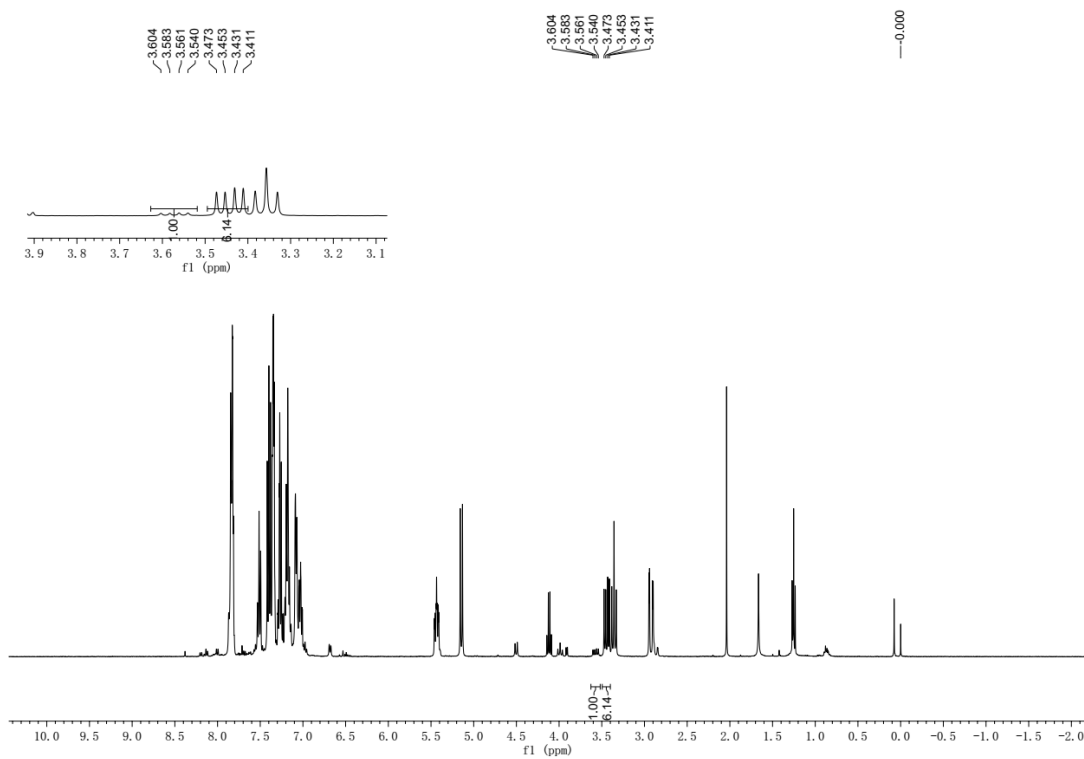

<sup>13</sup>CNMR of **31** (101M, CDCl<sub>3</sub>)

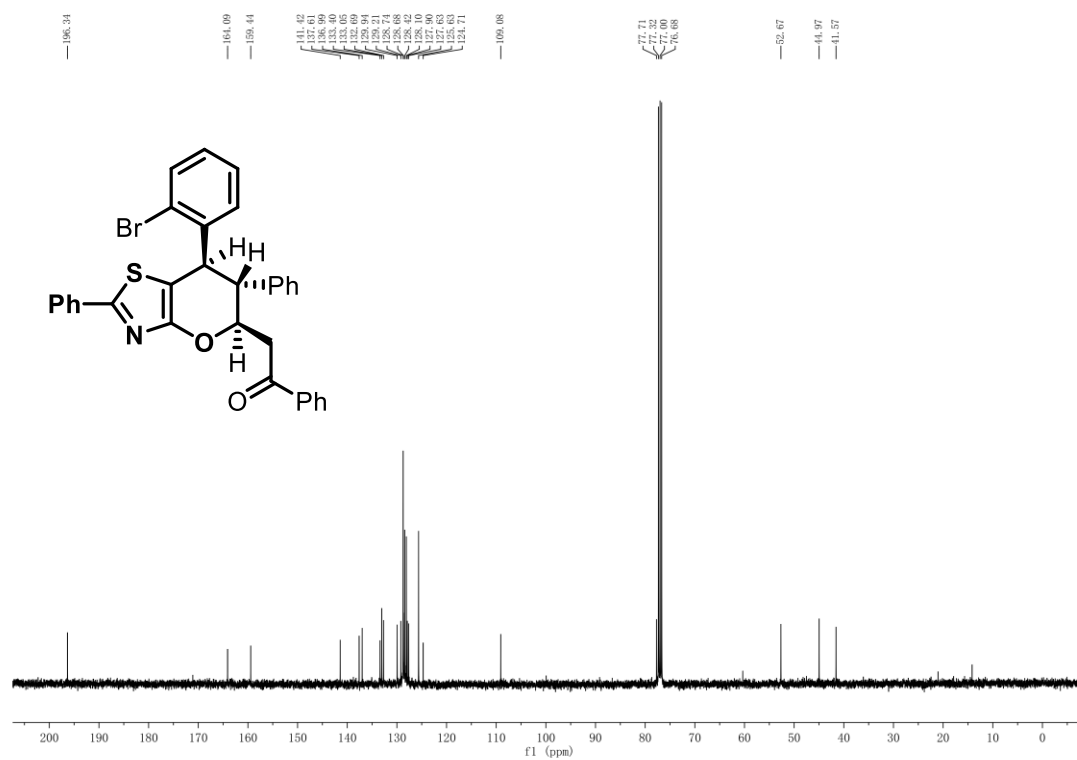

$^1\text{H NMR}$  of **3m** (400M,  $\text{CDCl}_3$ )

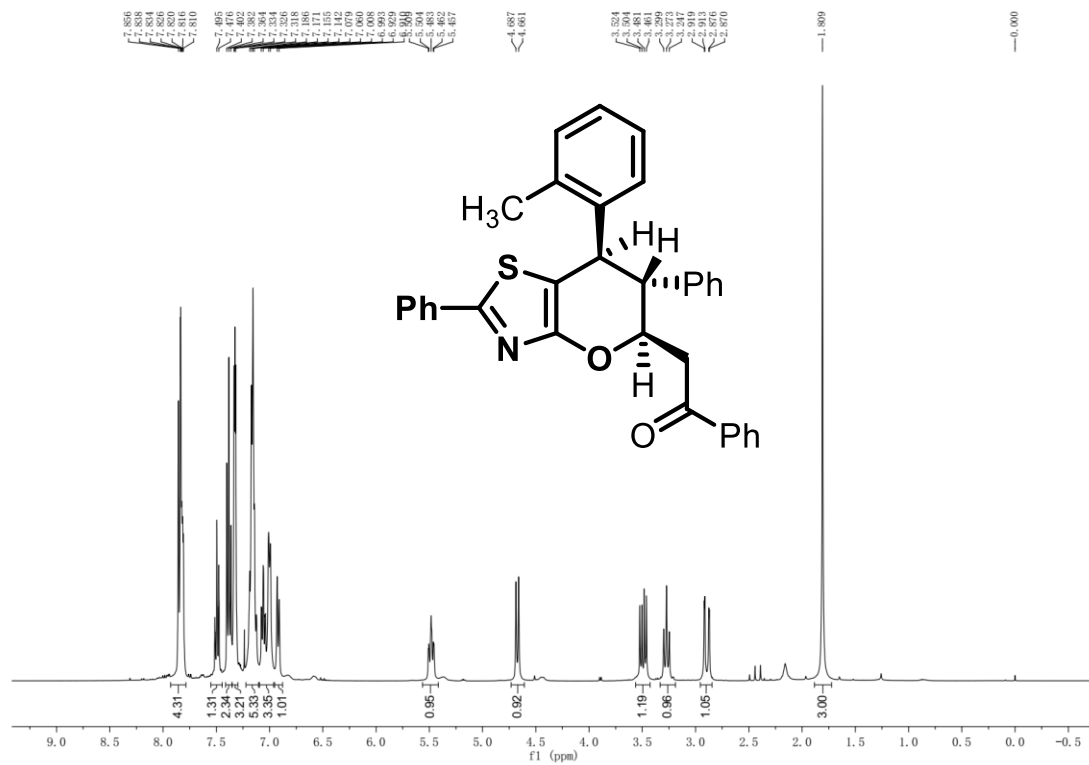

Crude  $^1\text{H NMR}$  of **3m** (400M,  $\text{CDCl}_3$ )

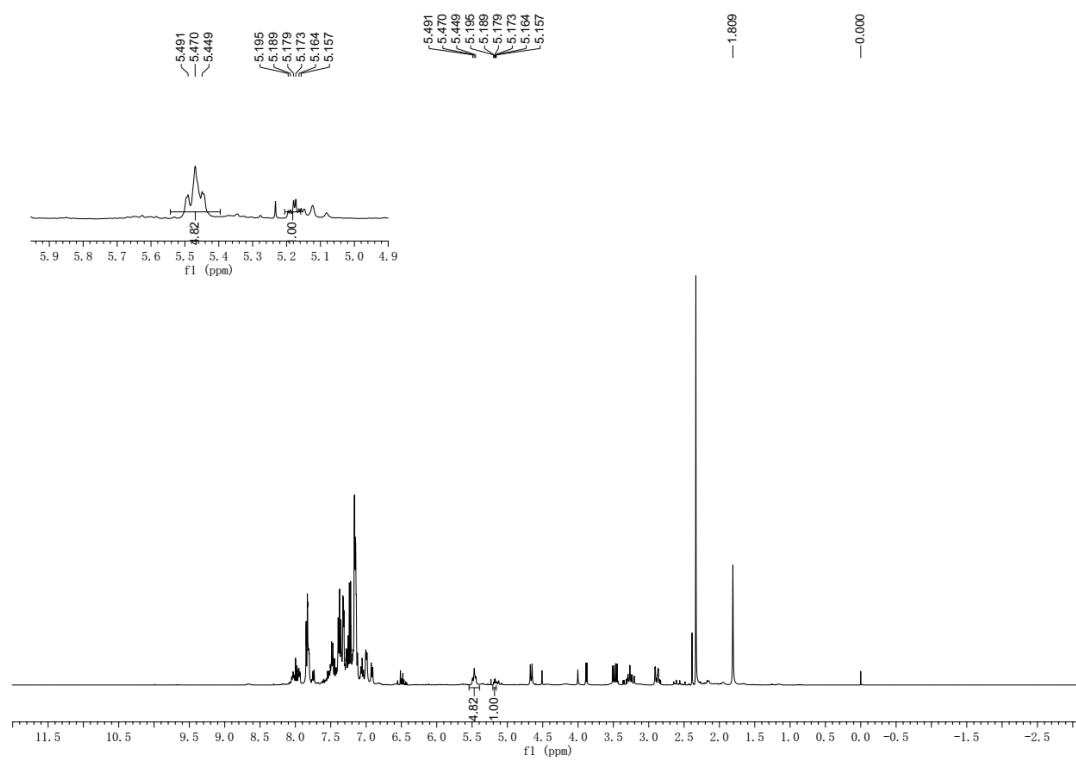

<sup>13</sup>CNMR of **3m** (101M, CDCl<sub>3</sub>)

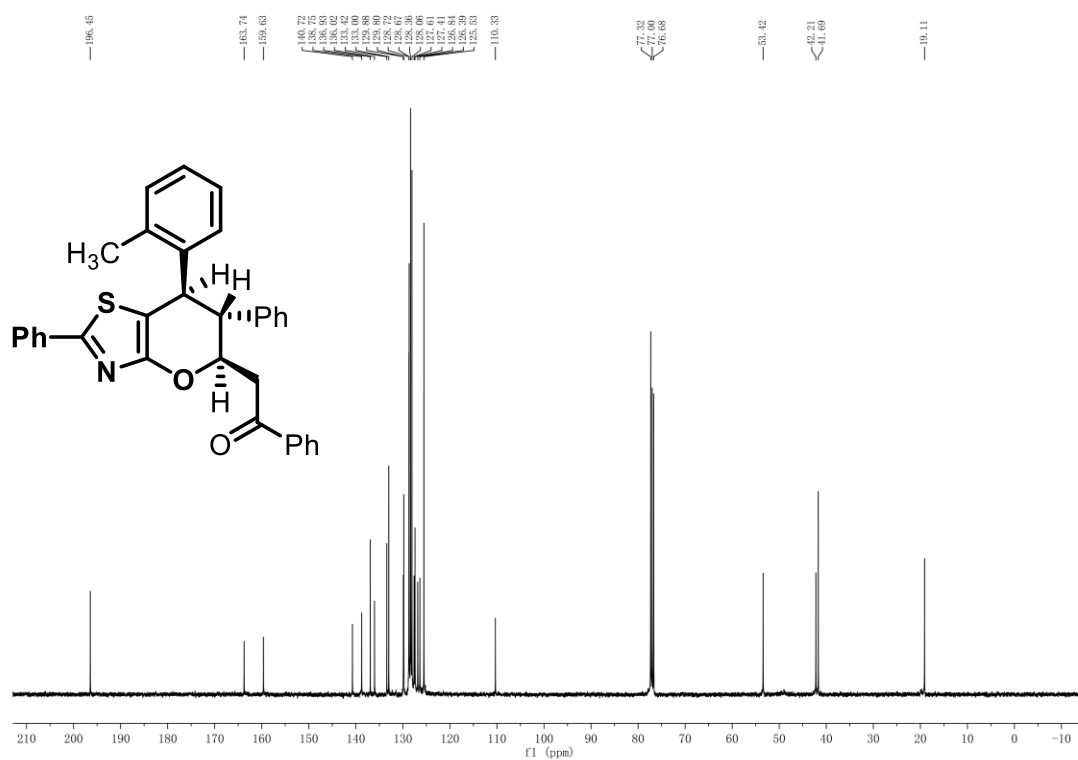

$^1\text{H}$ NMR of **3n** (400M,  $\text{CDCl}_3$ )

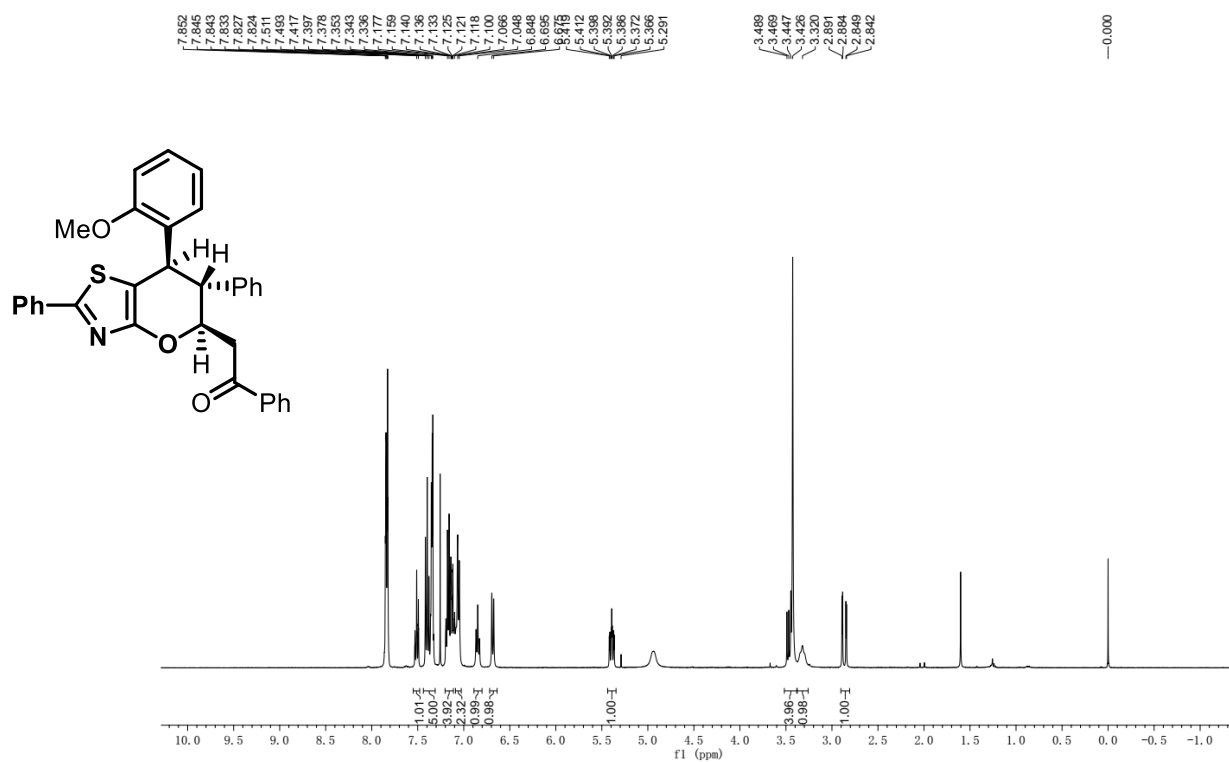

Crude  $^1\text{H}$ NMR of **3n** (400M,  $\text{CDCl}_3$ )

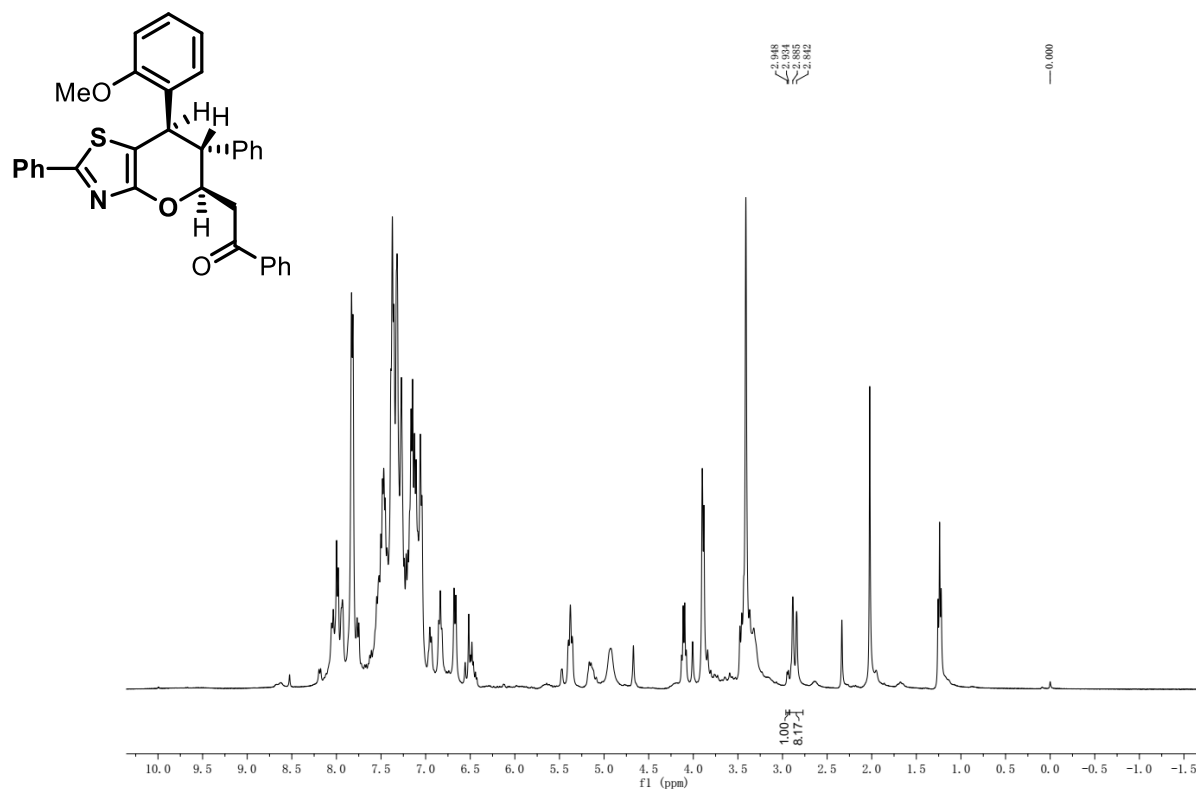

$^{13}\text{C}$ NMR of **3n** (101M,  $\text{CDCl}_3$ )

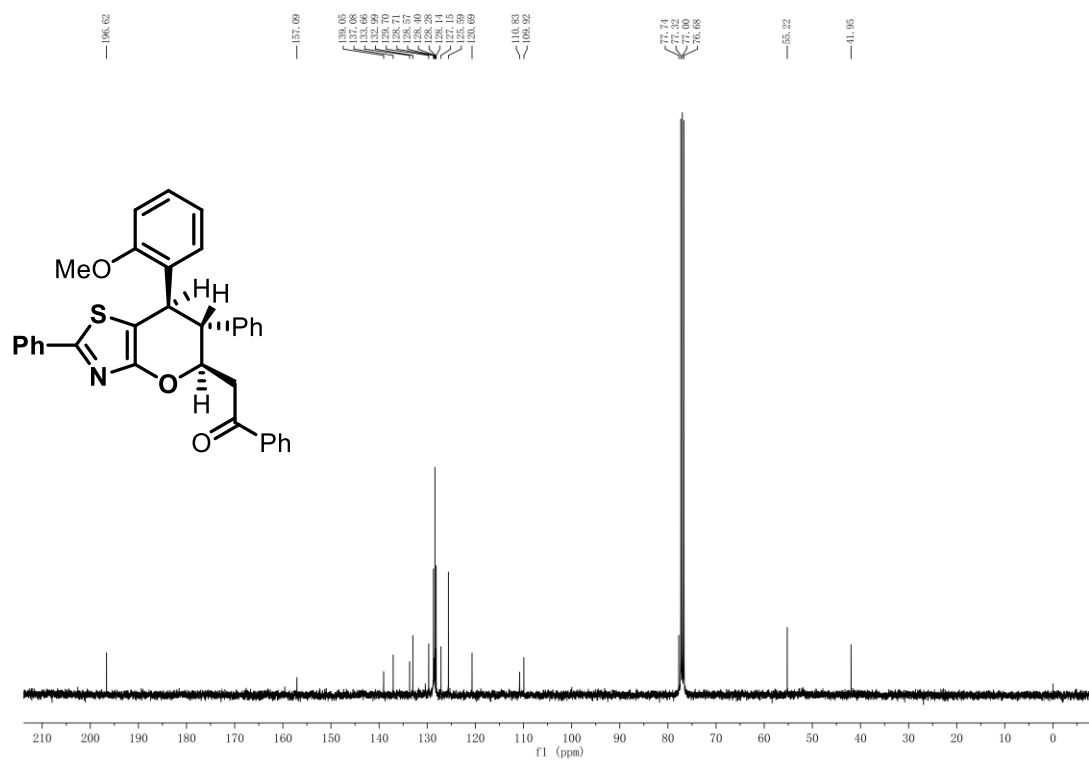

<sup>1</sup>HNMR of **3o** (400M, CDCl<sub>3</sub>)

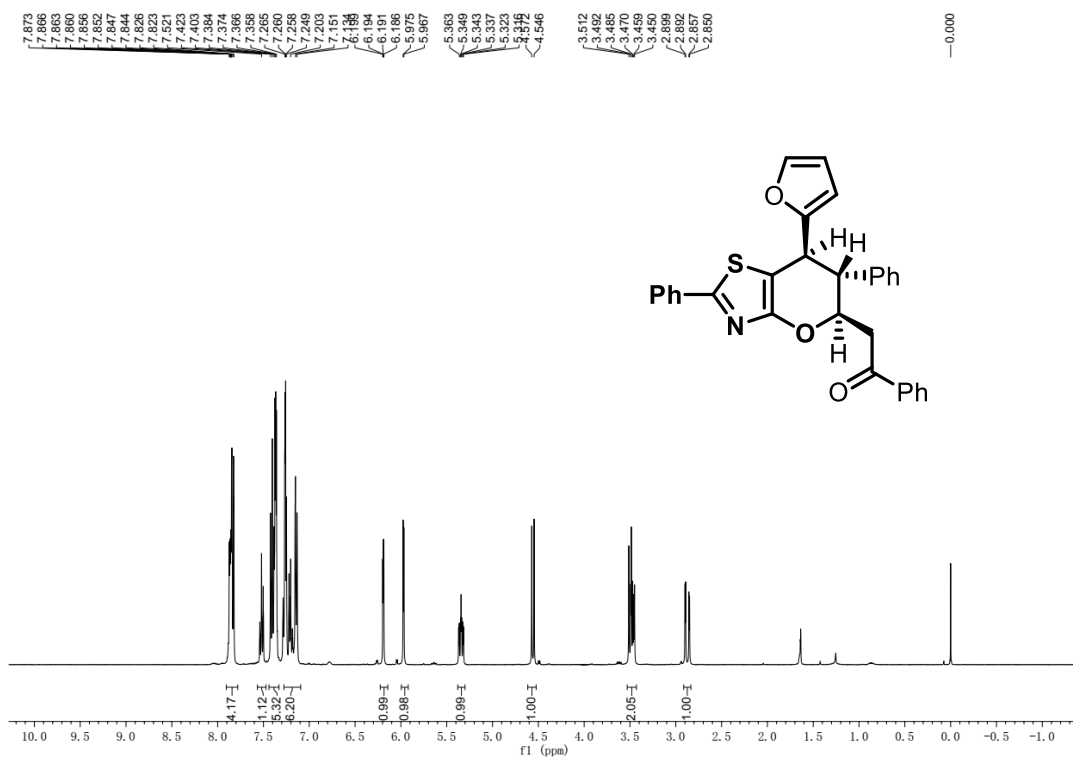

Crude <sup>1</sup>HNMR of **3o** (400M, CDCl<sub>3</sub>)

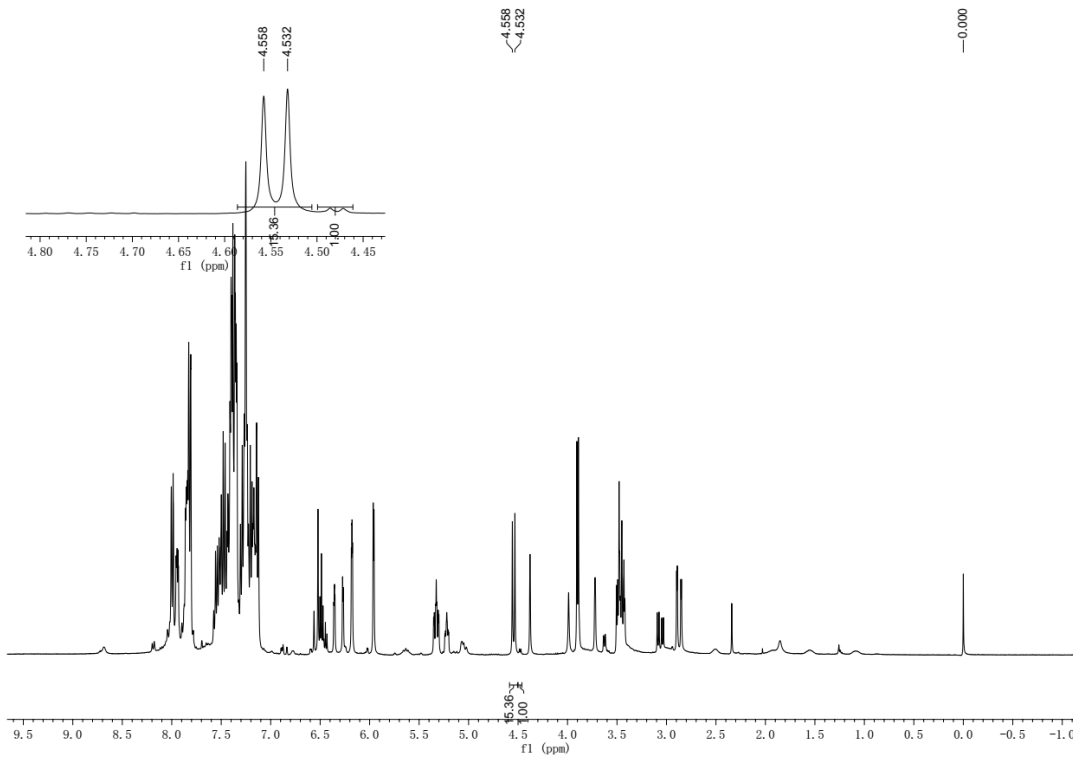

<sup>13</sup>CNMR of **3o** (101M, CDCl<sub>3</sub>)

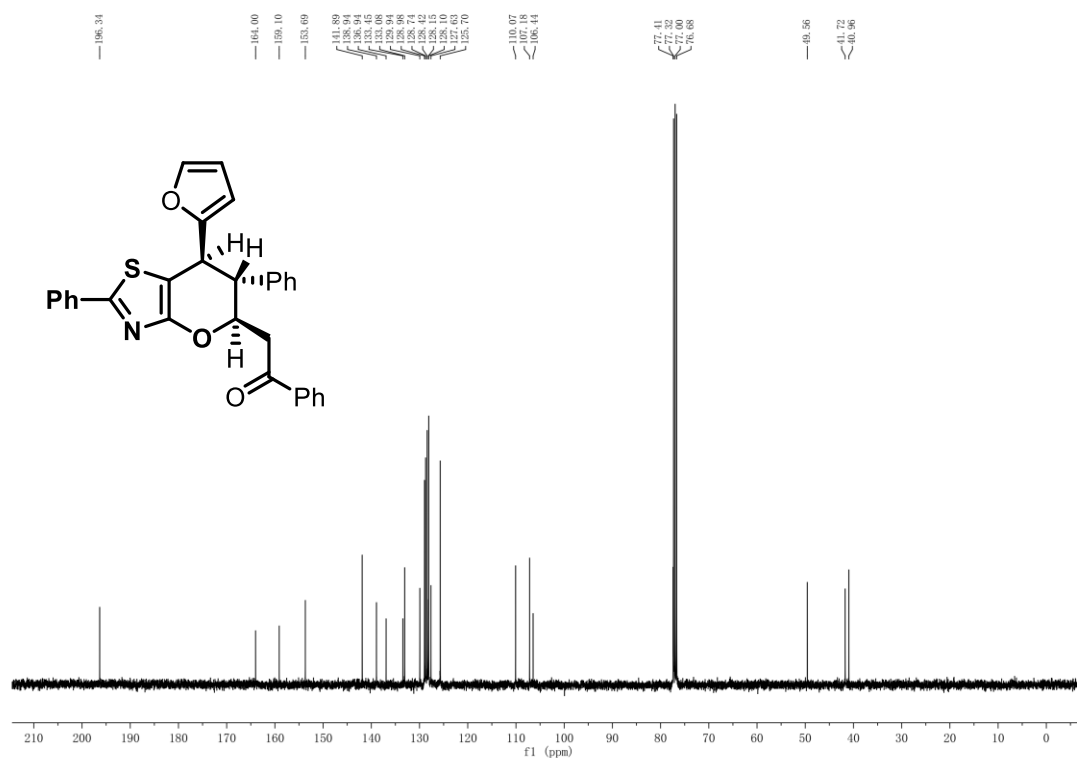



$^1\text{H NMR}$  of **3p** (400M,  $\text{CDCl}_3$ )

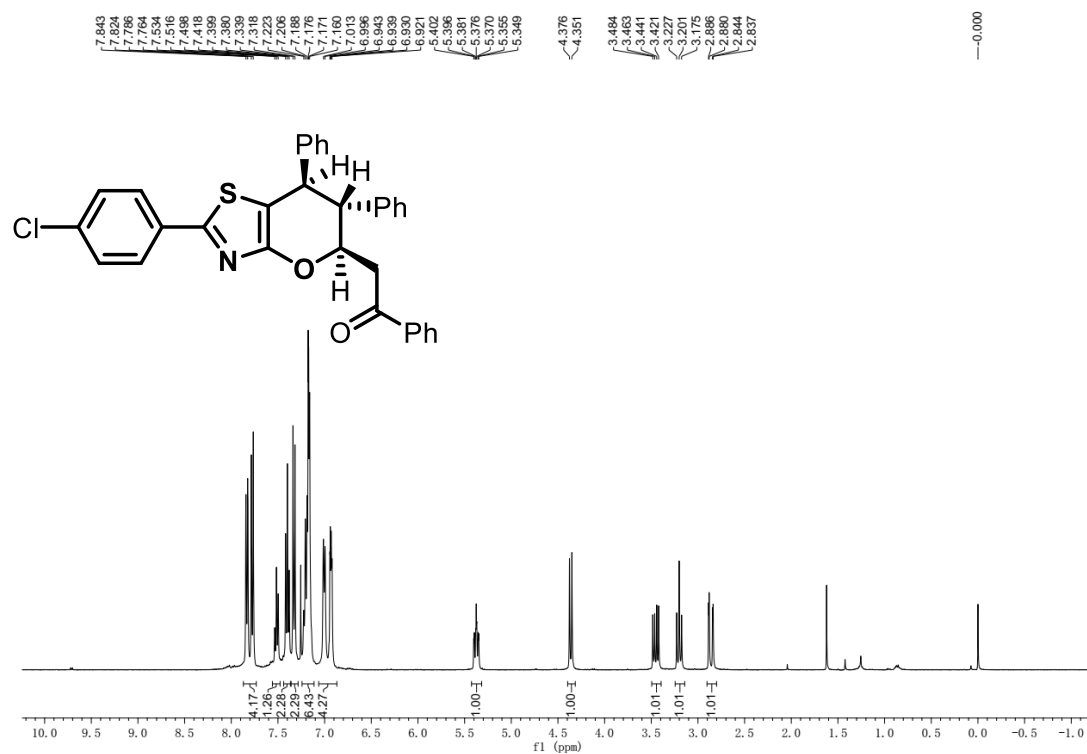

Crude  $^1\text{H NMR}$  of **3p** (400M,  $\text{CDCl}_3$ )

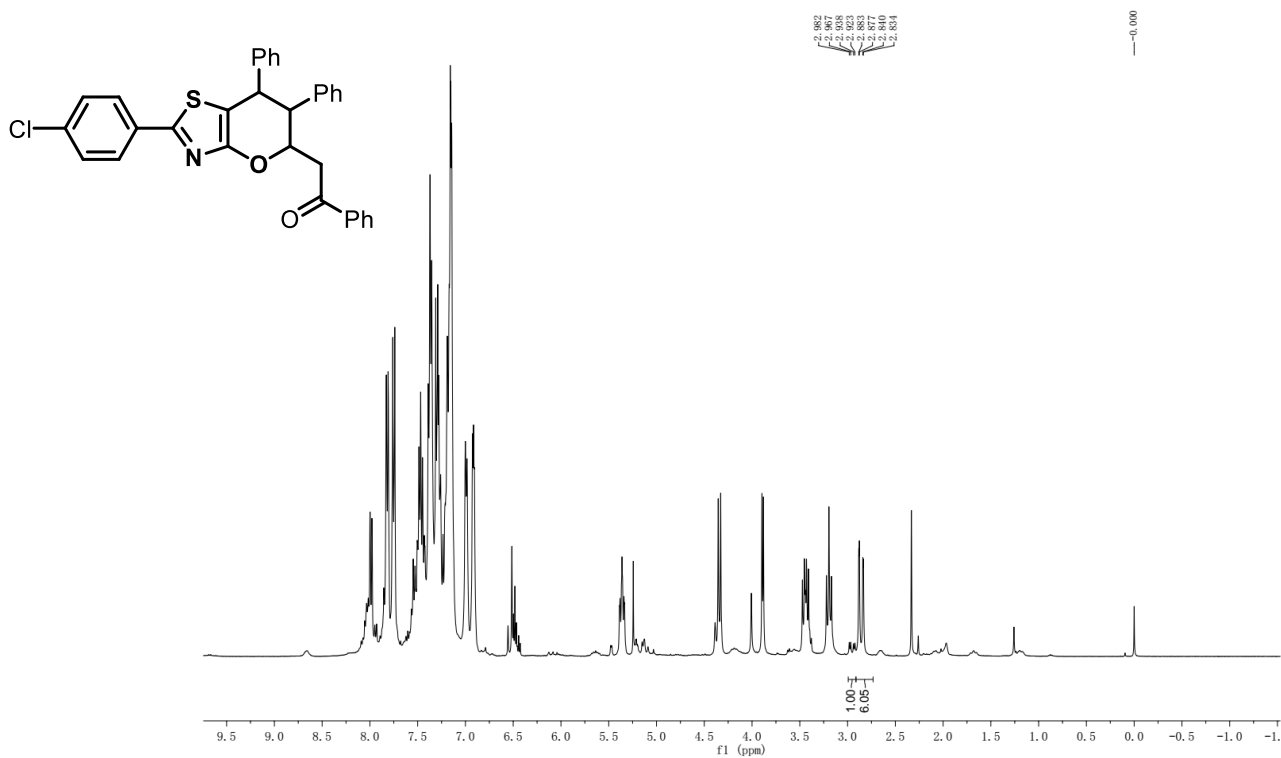

<sup>13</sup>CNMR of **3p** (101M, CDCl<sub>3</sub>)

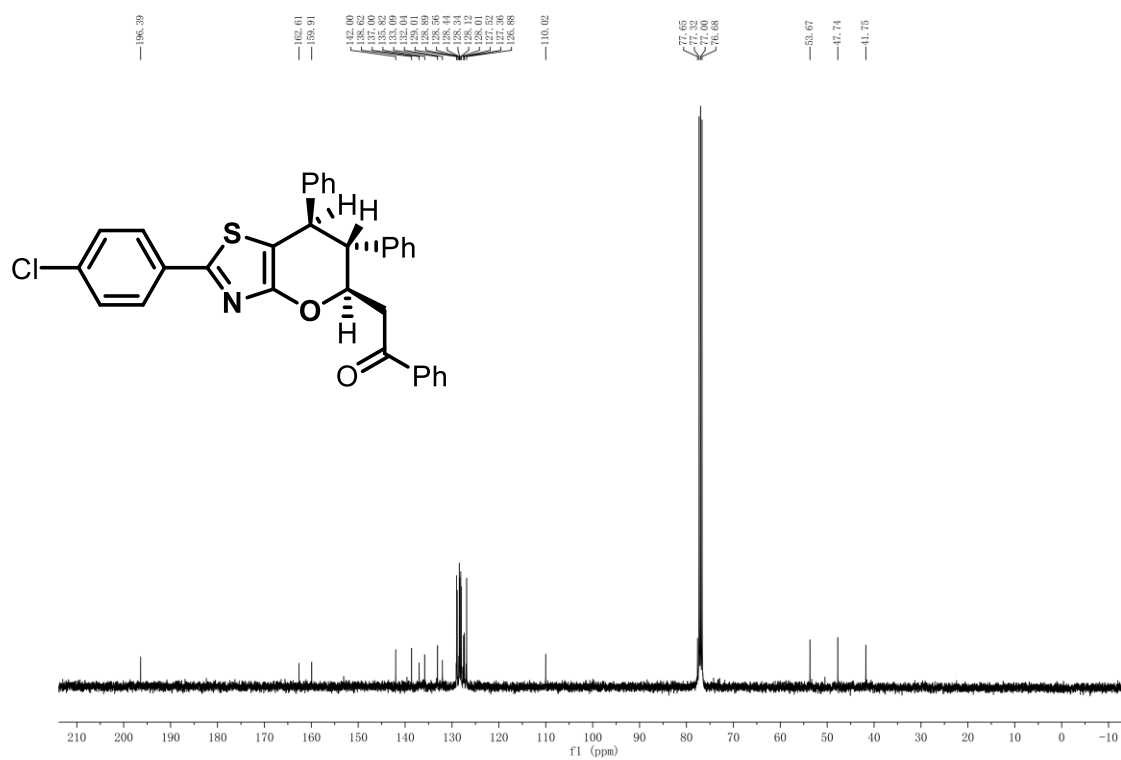

<sup>1</sup>HNMR of **3q** (400M, CDCl<sub>3</sub>)

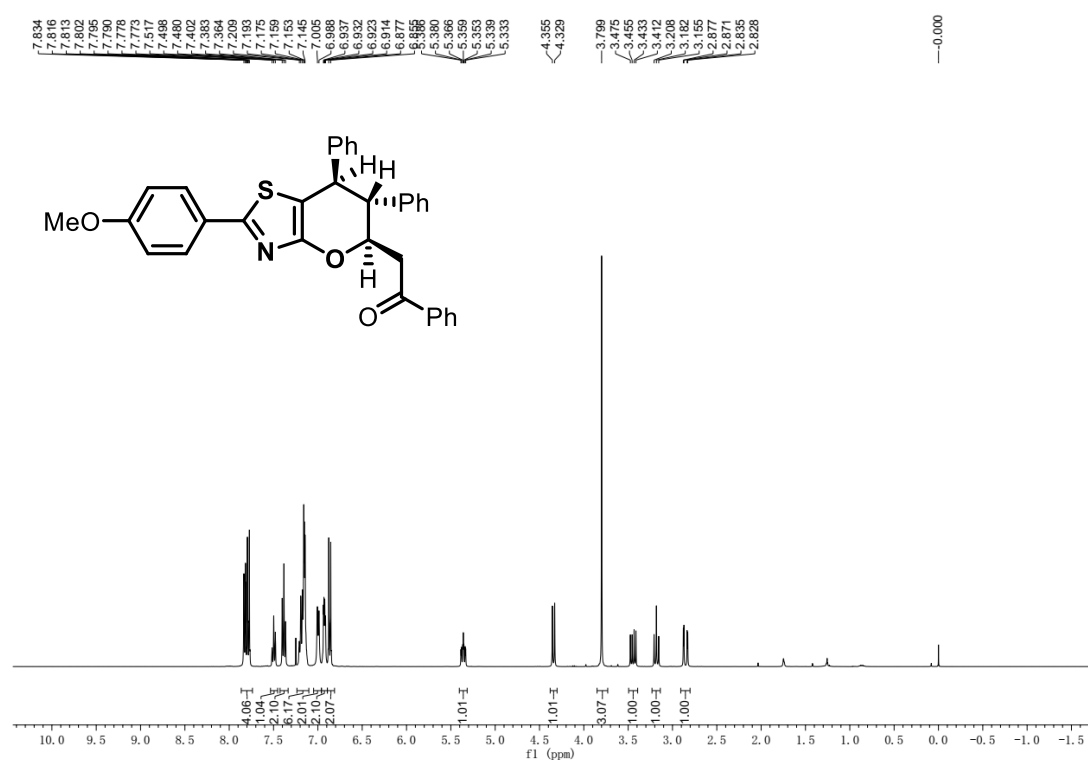

Crude <sup>1</sup>HNMR of **3q** (400M, CDCl<sub>3</sub>)

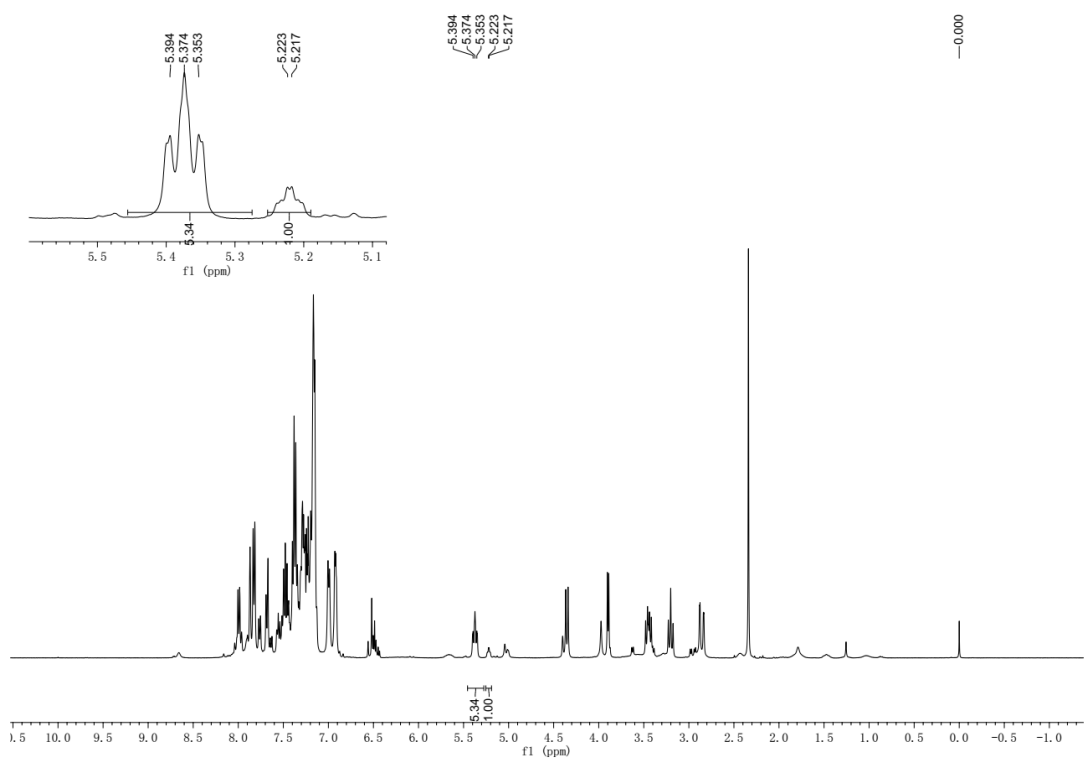

$^{13}\text{C}$ NMR of **3q** (101M,  $\text{CDCl}_3$ )

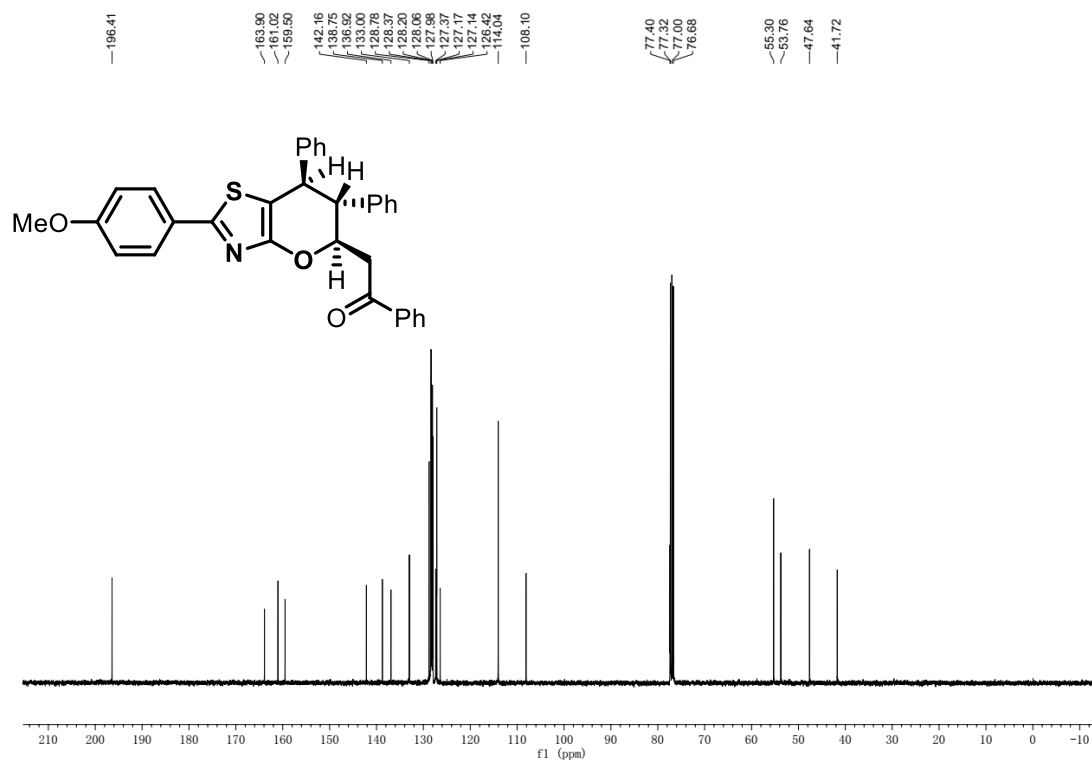

$^1\text{H}$ NMR of **3r** (400M,  $\text{CDCl}_3$ )

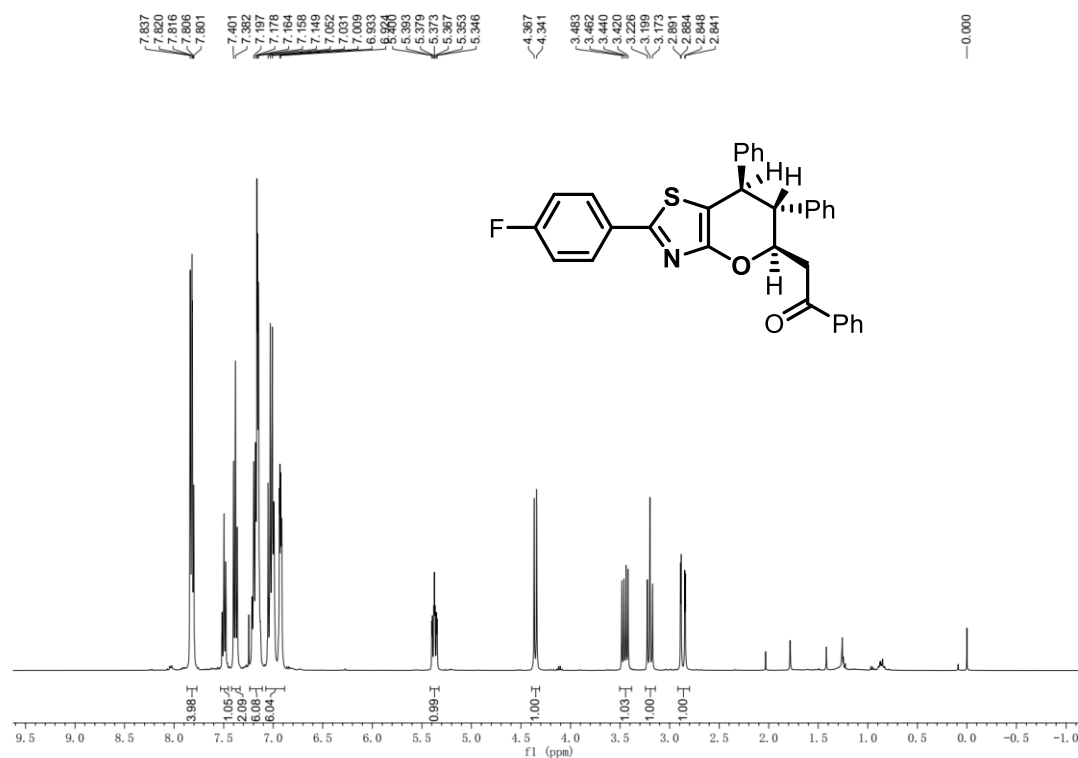

Crude  $^1\text{H}$ NMR of **3r** (400M,  $\text{CDCl}_3$ )

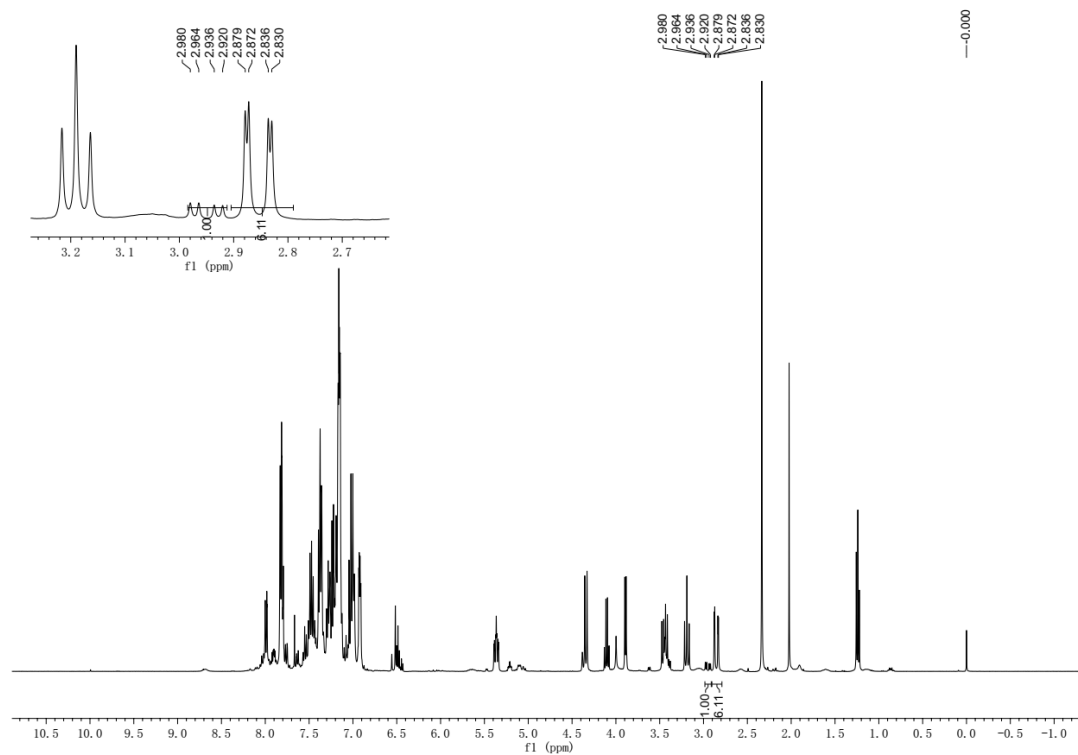

$^{19}\text{F}$ NMR of **3k** (400M,  $\text{CDCl}_3$ )

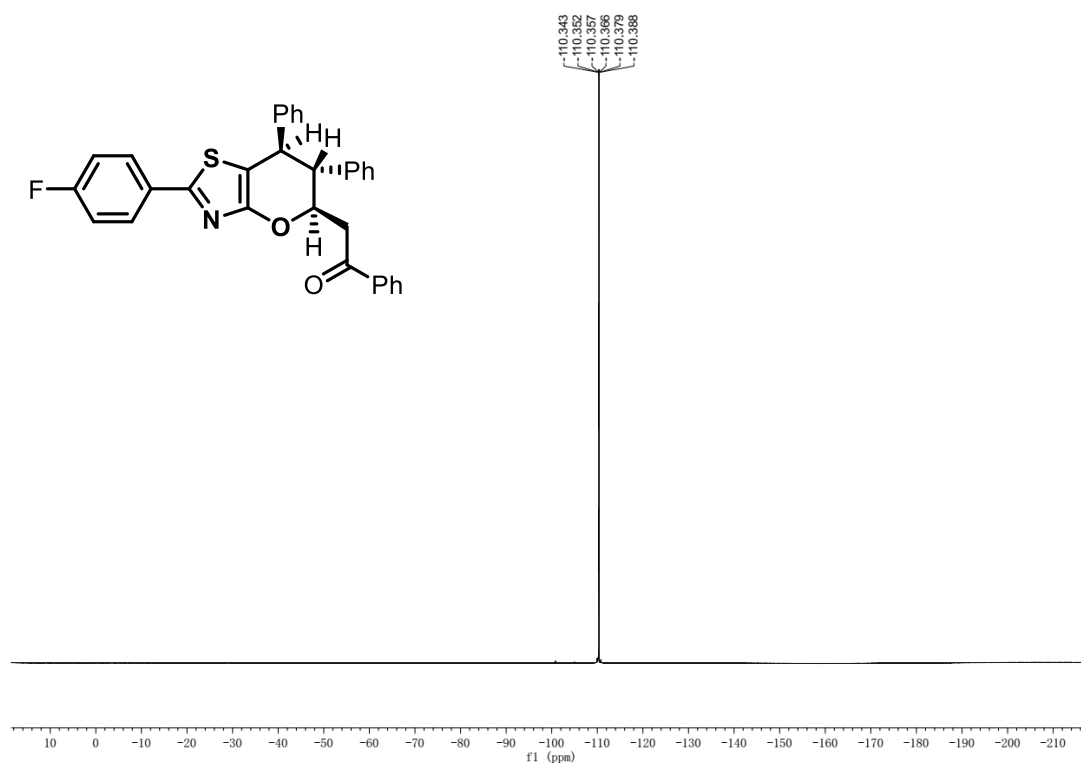

$^{13}\text{C}$ NMR of **3r** (101M,  $\text{CDCl}_3$ )

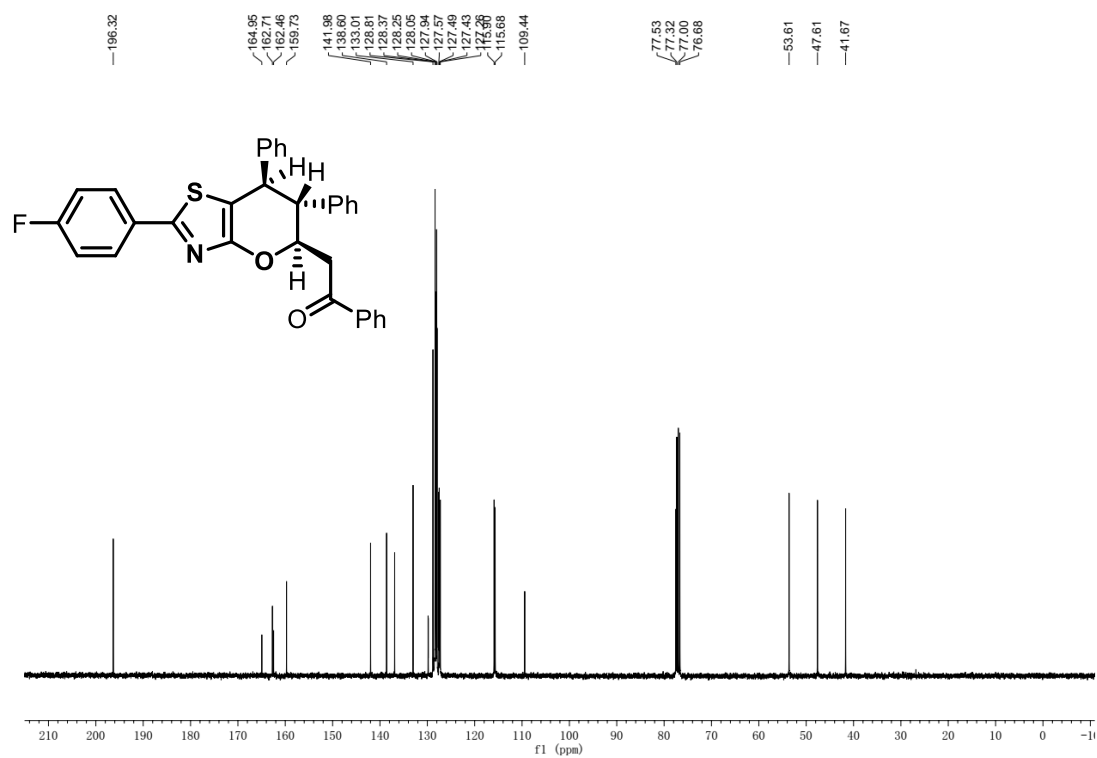

$^1\text{H}$ NMR of **3s**(400M,  $\text{CDCl}_3$ )

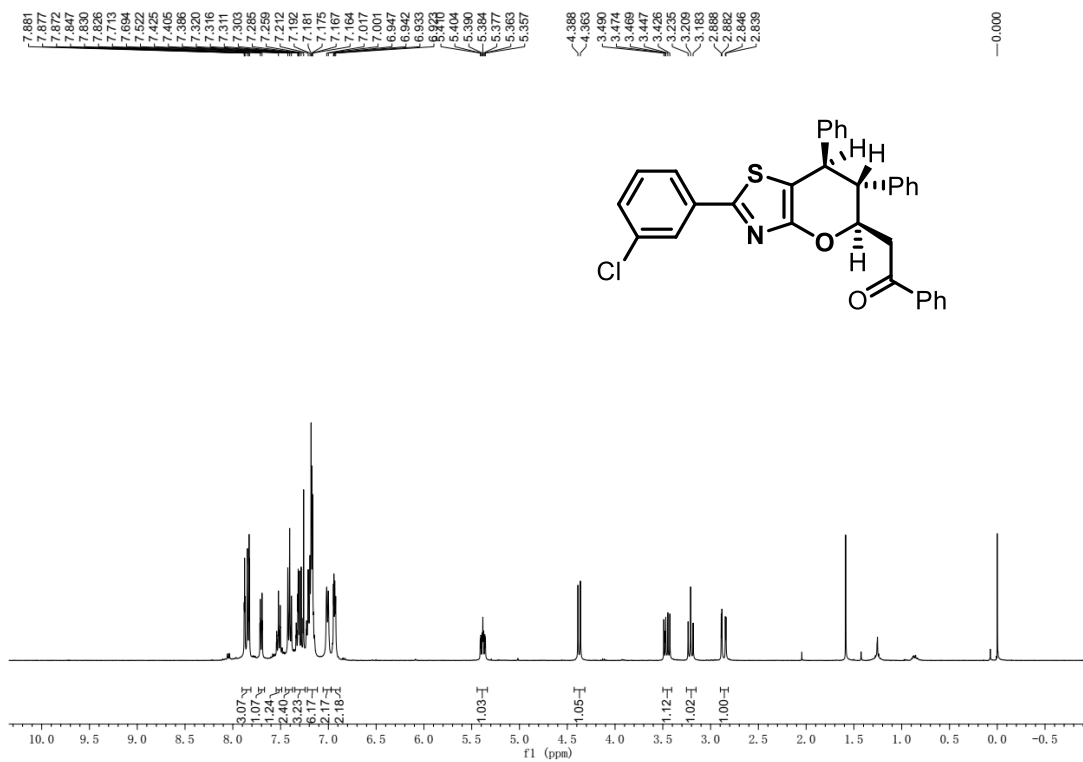

Crude  $^1\text{H}$ NMR of **3s** (400M,  $\text{CDCl}_3$ )

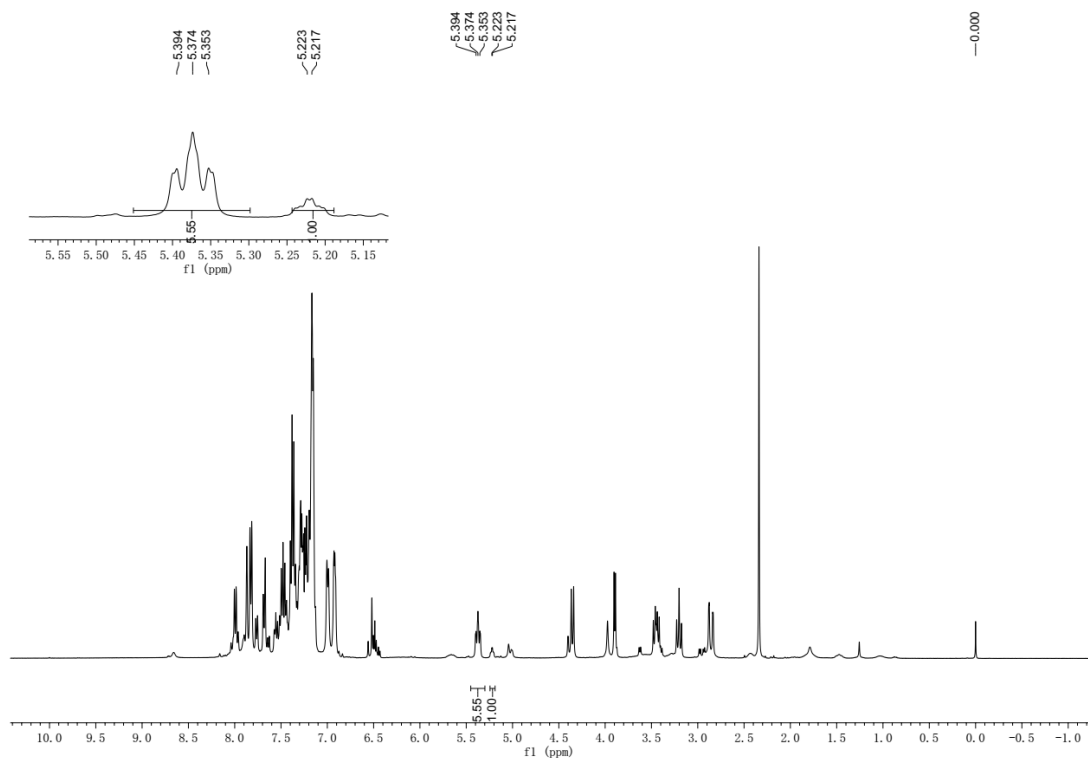

$^{13}\text{C}$ NMR of **3s** (101M,  $\text{CDCl}_3$ )

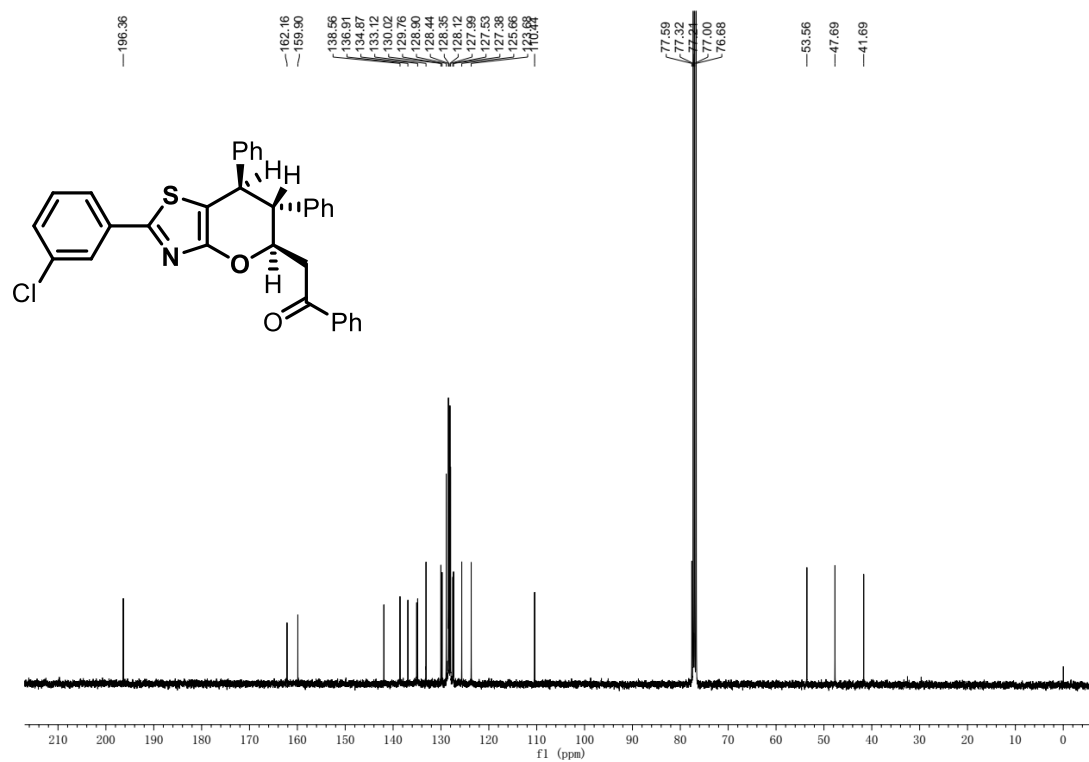

$^1\text{H}$ NMR of **3t** (400M,  $\text{CDCl}_3$ )

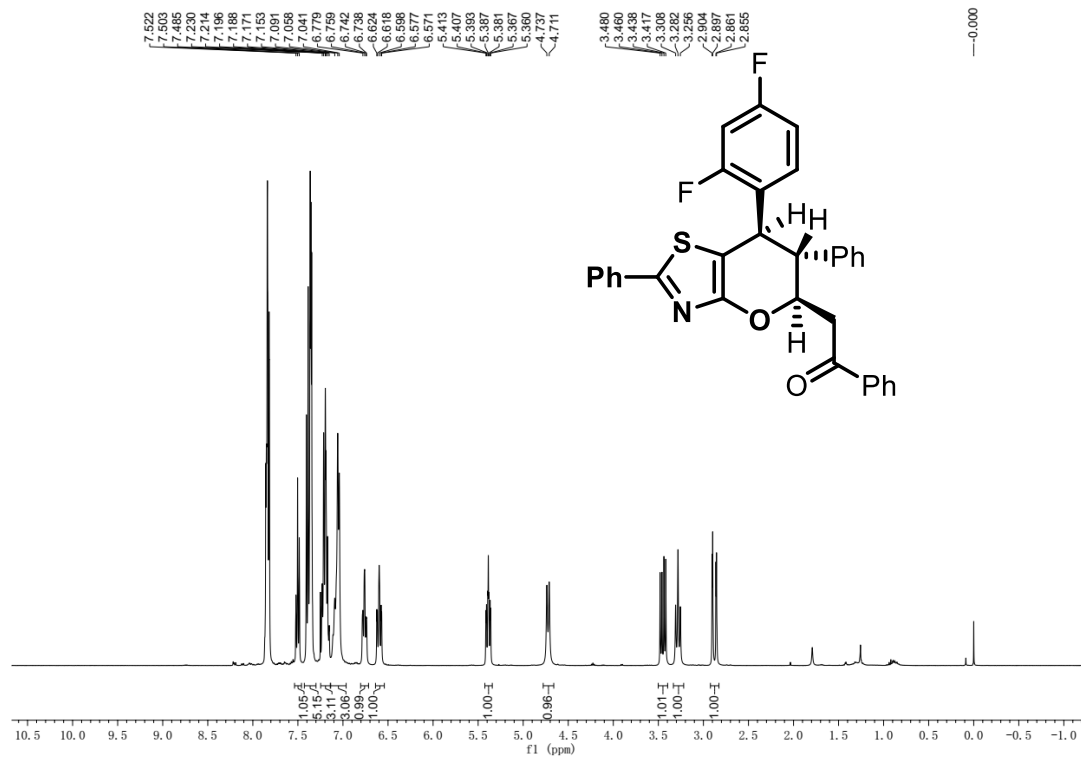



Crude <sup>1</sup>H NMR of **3t** (400M, CDCl<sub>3</sub>)

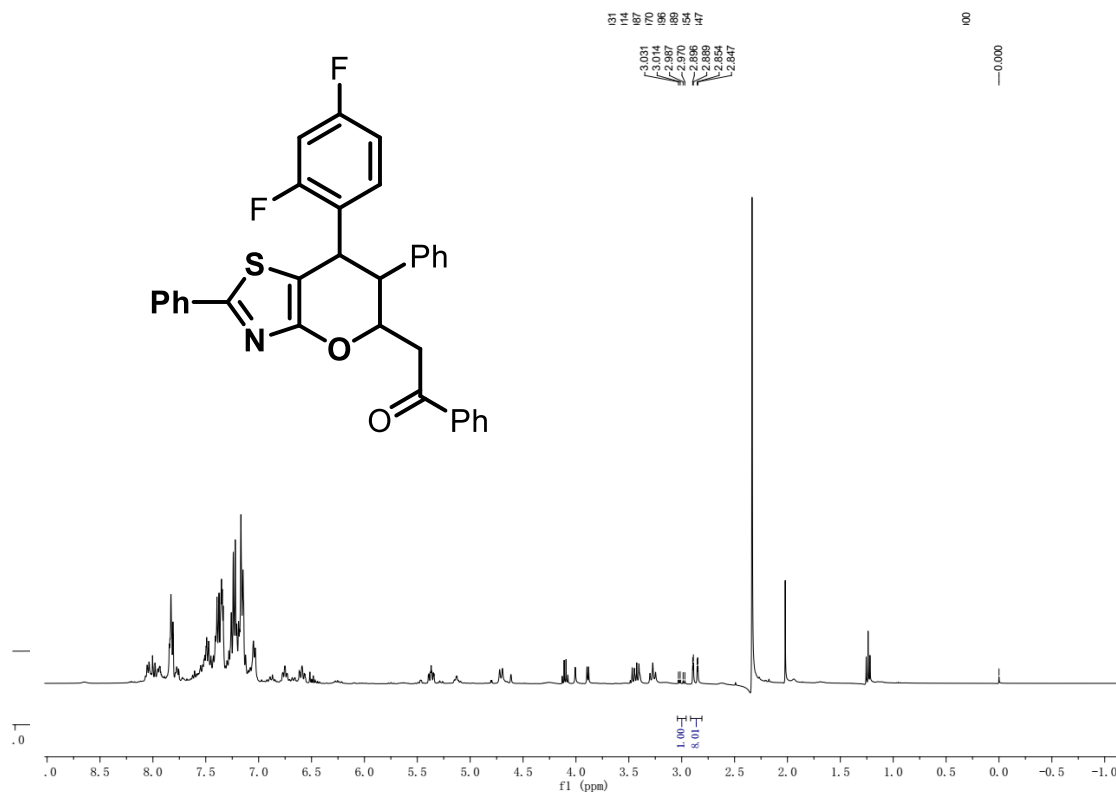

<sup>19</sup>F NMR of **3t** (400M, CDCl<sub>3</sub>)

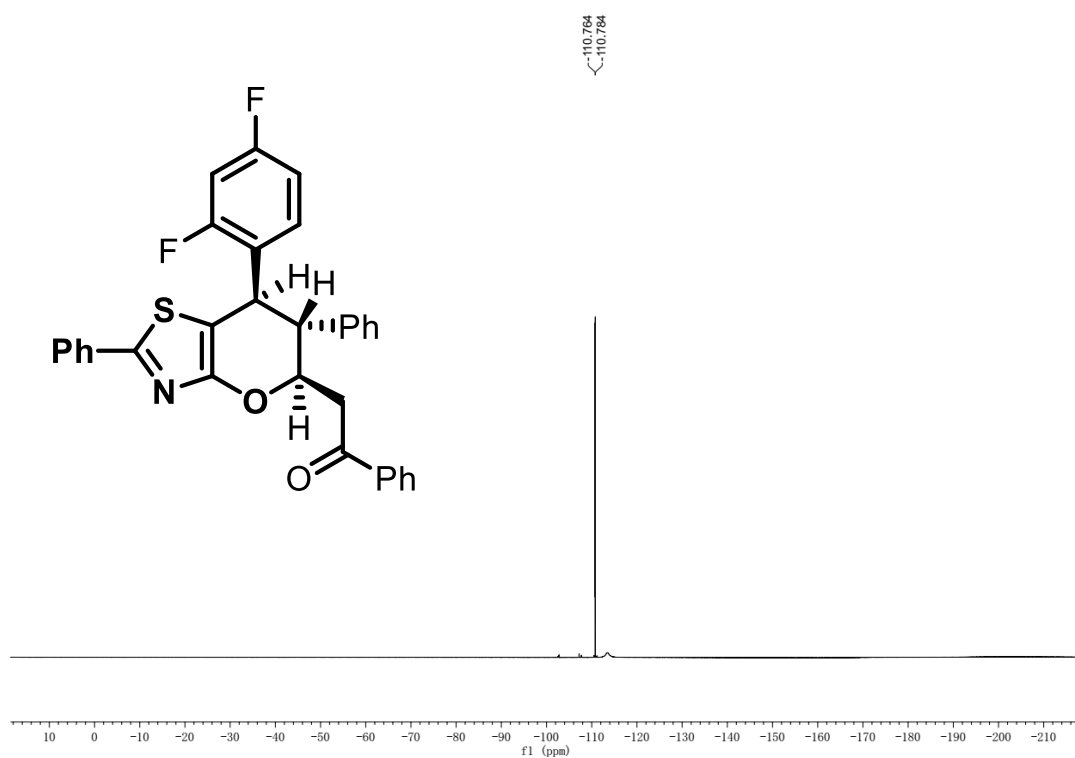

$^{13}\text{C}$  NMR of **3t** (101M,  $\text{CDCl}_3$ )

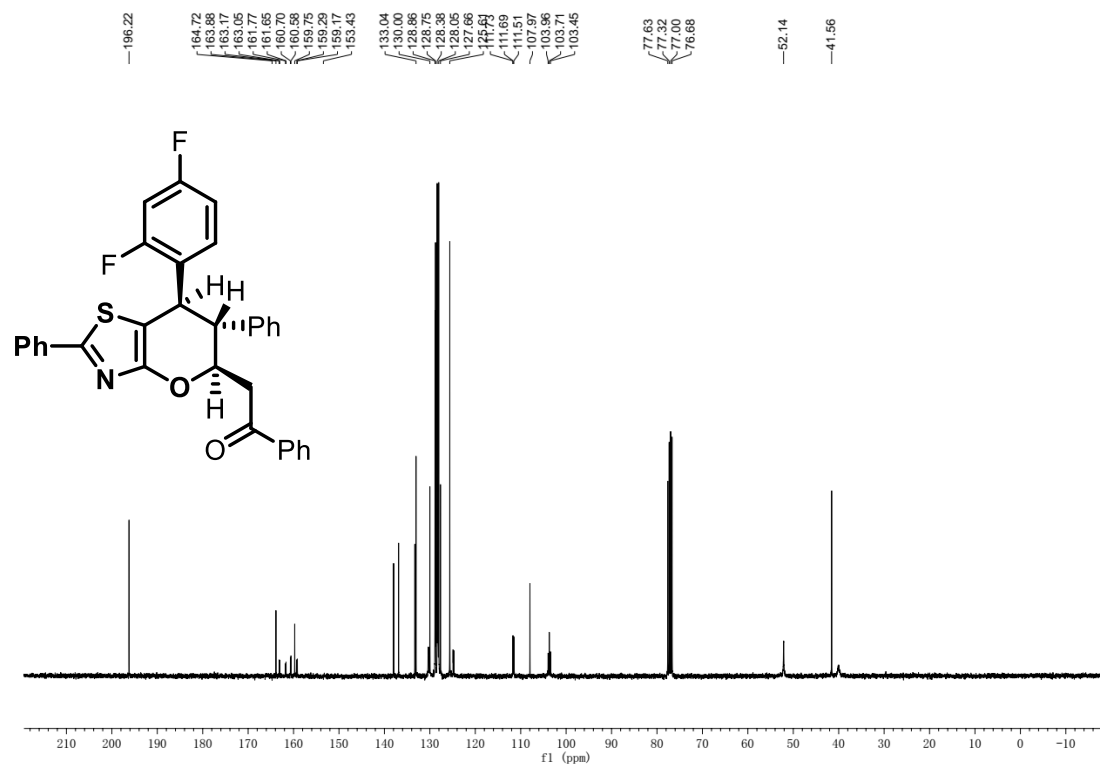

<sup>1</sup>H NMR of **4a** (400M, CDCl<sub>3</sub>)

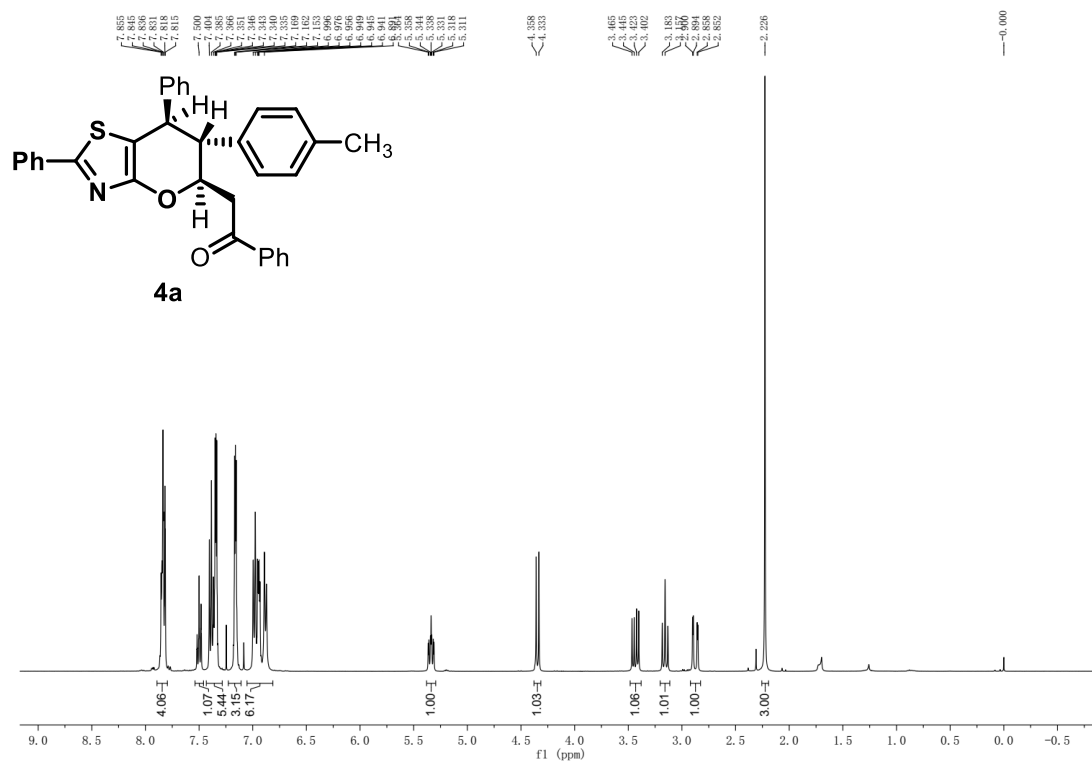

Crude <sup>1</sup>H NMR of **4a** (400M, CDCl<sub>3</sub>)

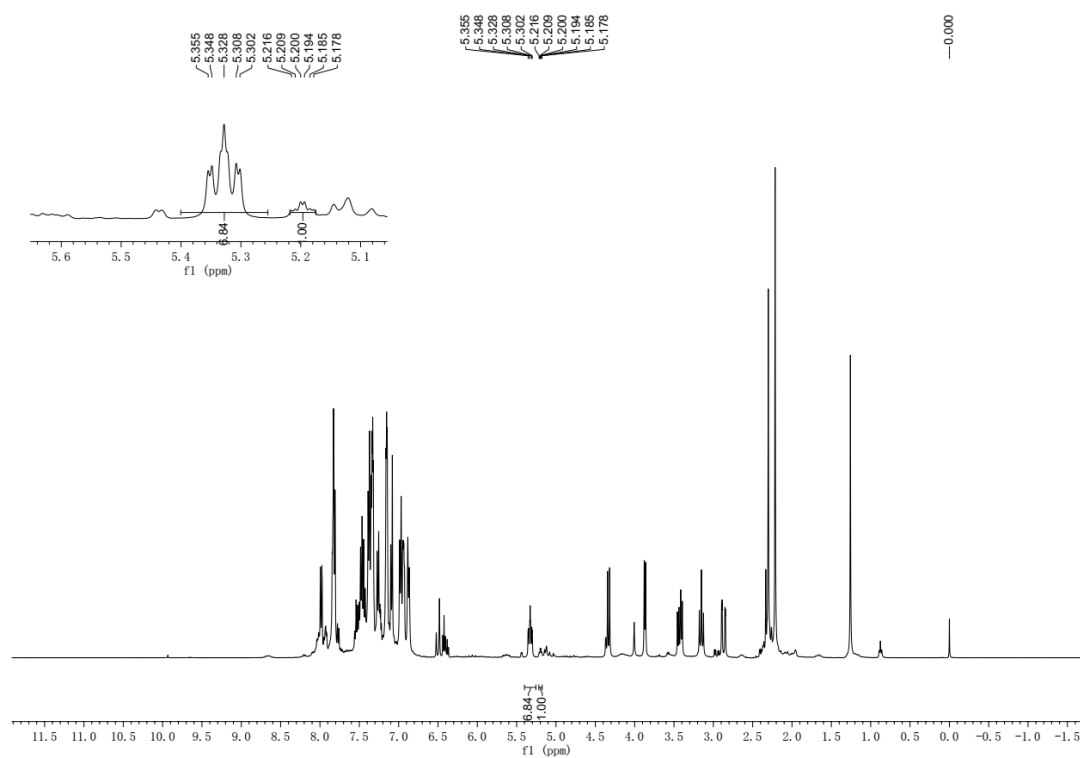

<sup>13</sup>CNMR of **4a** (101M, CDCl<sub>3</sub>)

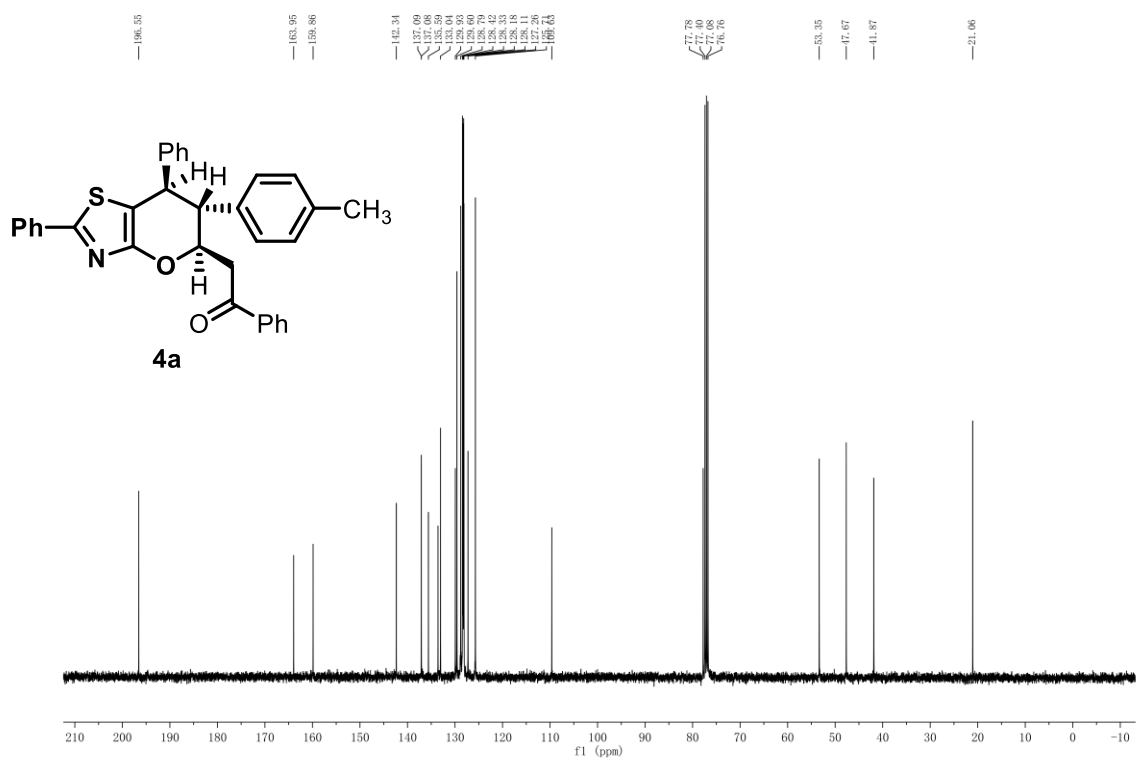

<sup>1</sup>H NMR of **4b** (400M, CDCl<sub>3</sub>)

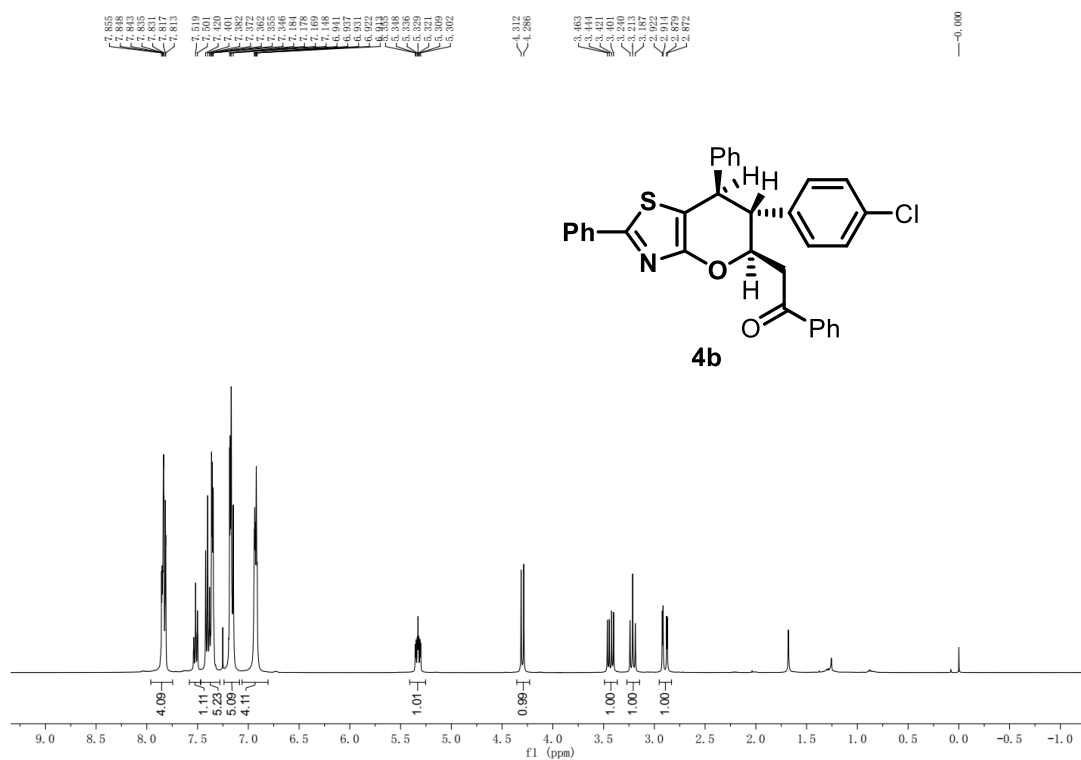

Crude <sup>1</sup>H NMR of **4b** (400M, CDCl<sub>3</sub>)

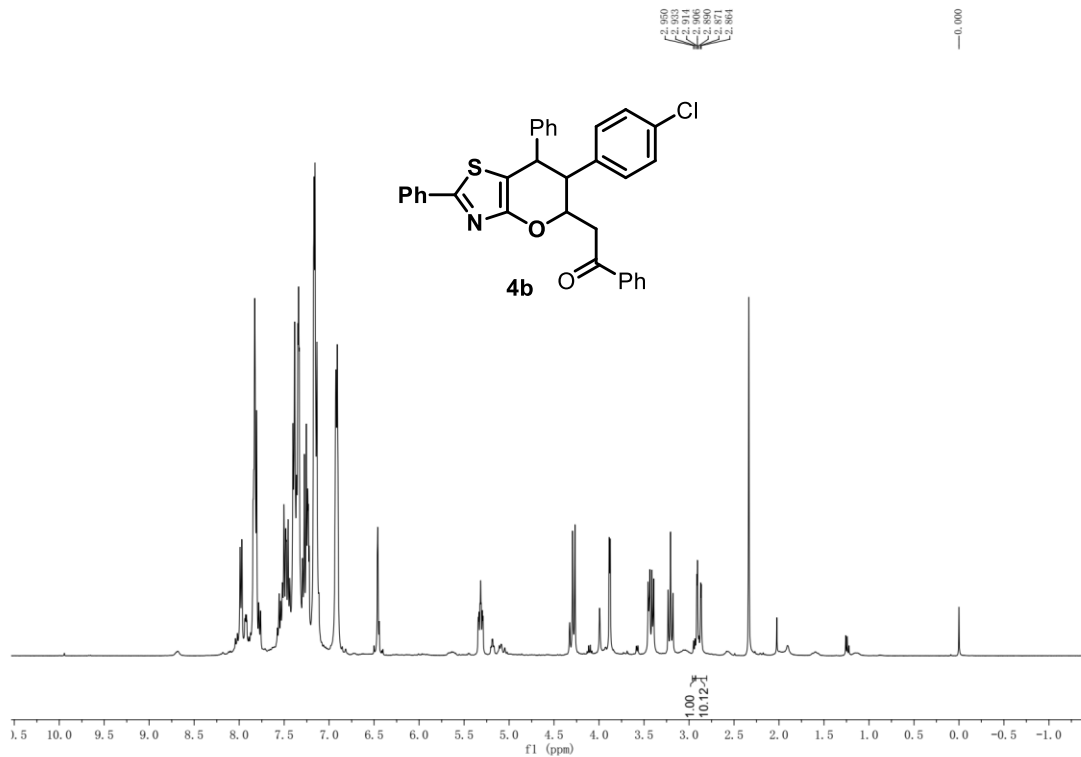

$^{13}\text{C}$ NMR of **4b** (101M,  $\text{CDCl}_3$ )

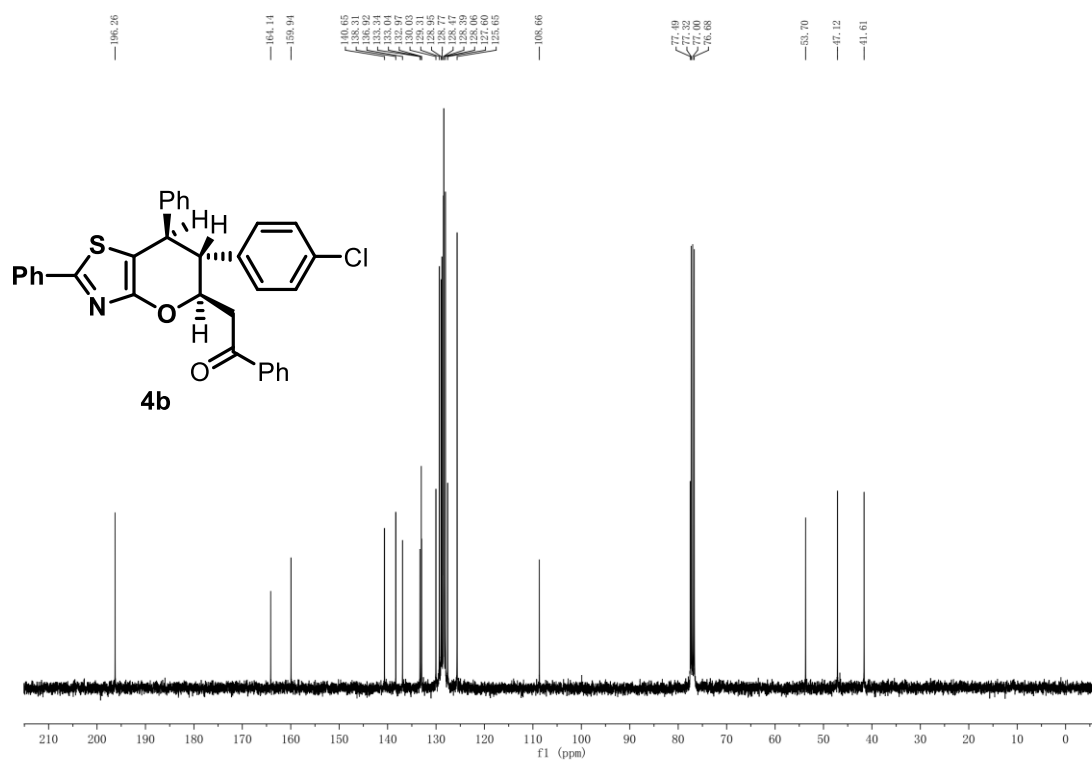

$^1\text{H}$ NMR of **4c** (400M,  $\text{CDCl}_3$ )

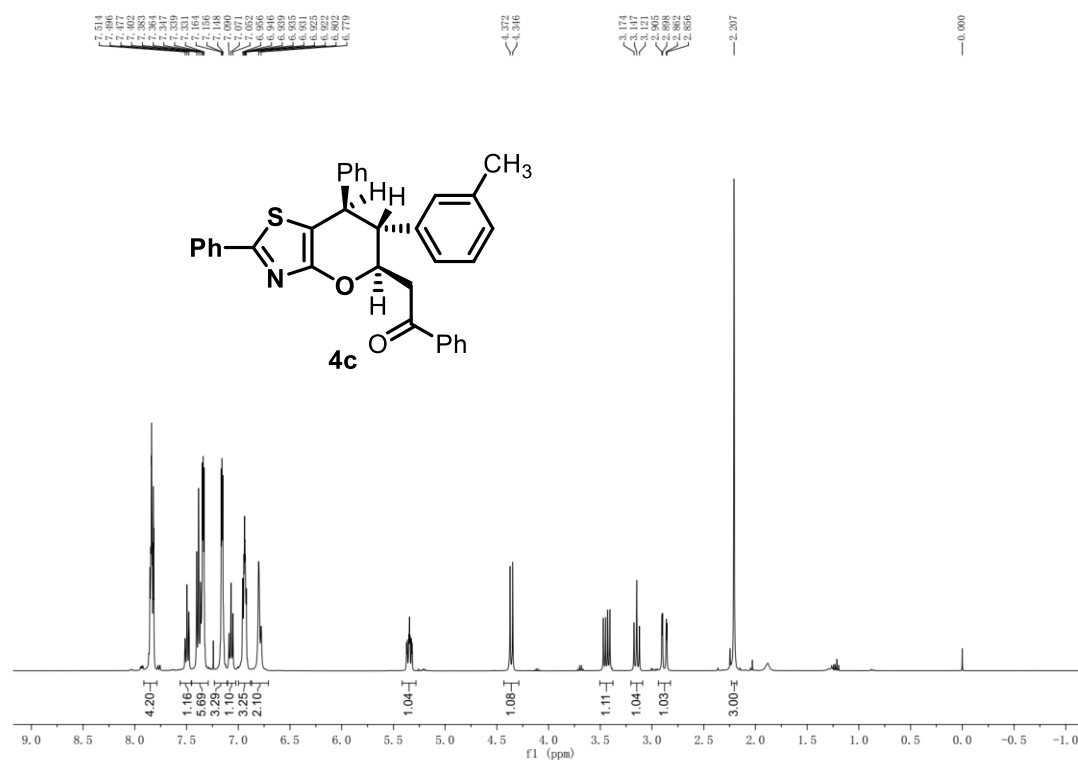

Crude  $^1\text{H}$  NMR of **4c** (400M,  $\text{CDCl}_3$ )

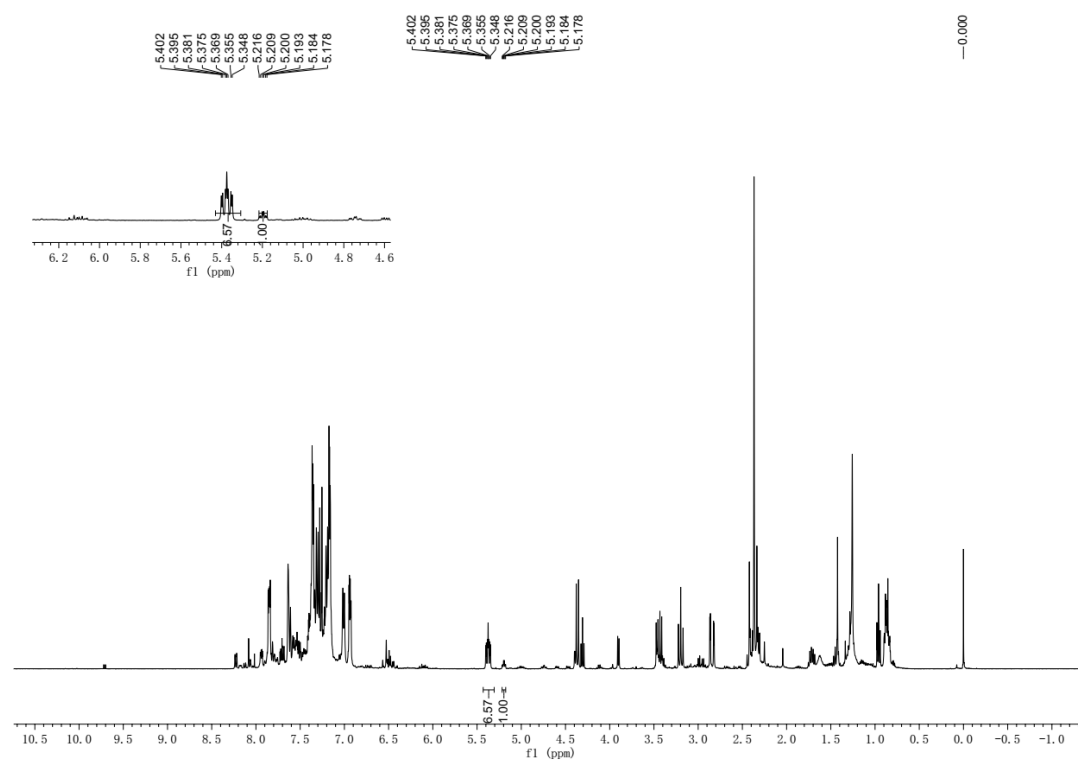

<sup>13</sup>CNMR of **4c** (101M, CDCl<sub>3</sub>)

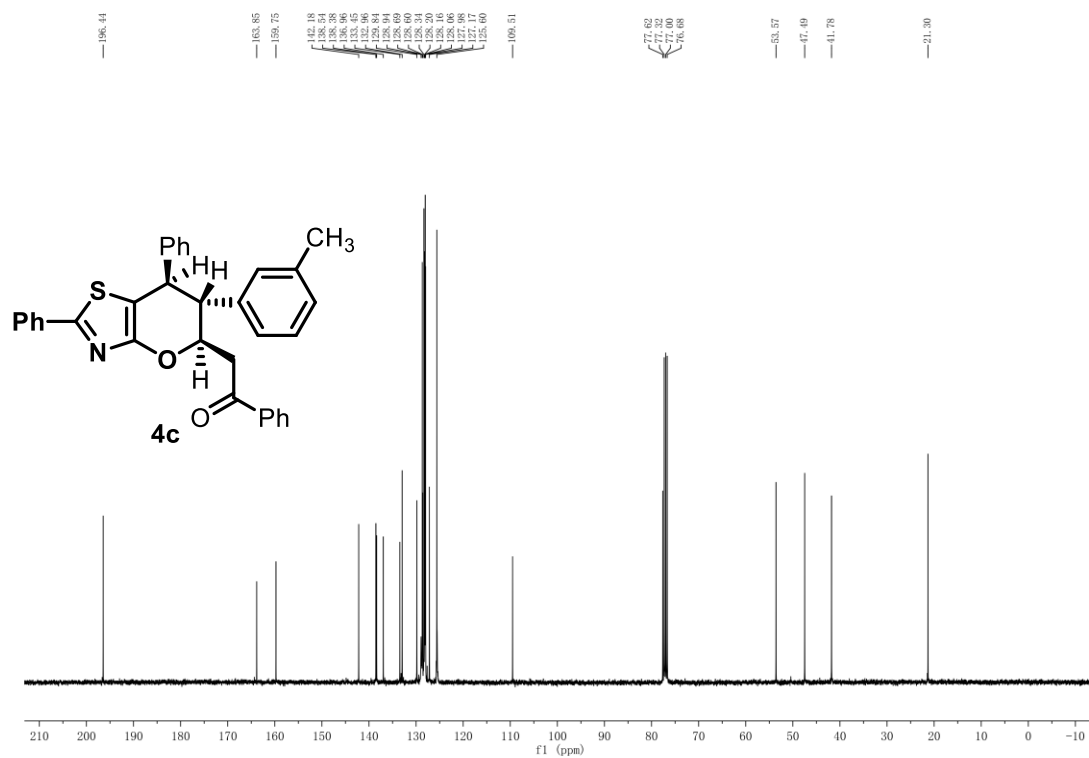



<sup>1</sup>H NMR of **4d** (400M, CDCl<sub>3</sub>)

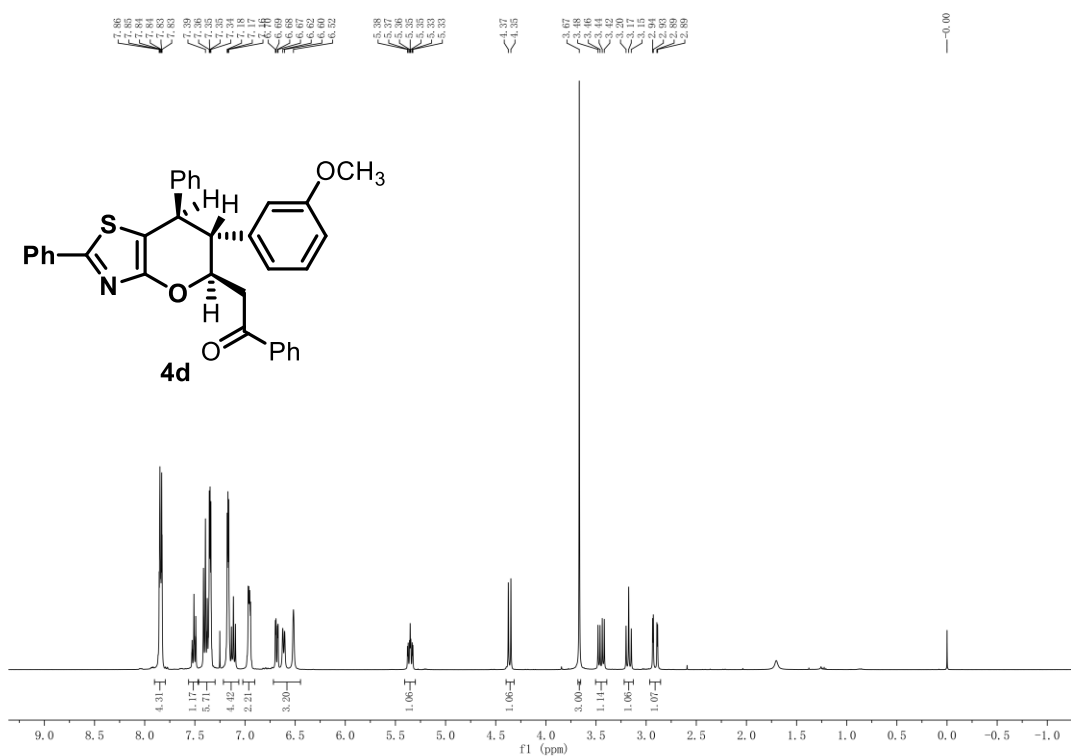

Crude <sup>1</sup>H NMR of **4d** (400M, CDCl<sub>3</sub>)

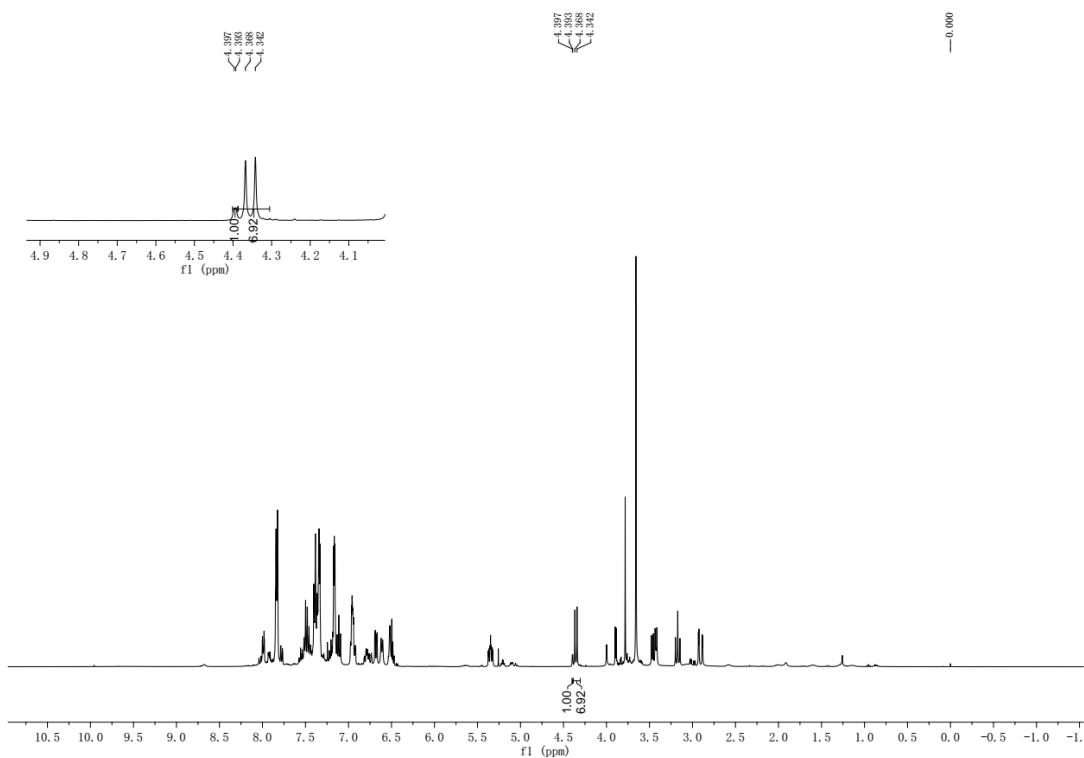

$^{13}\text{C}$ NMR of **4d** (101M,  $\text{CDCl}_3$ )

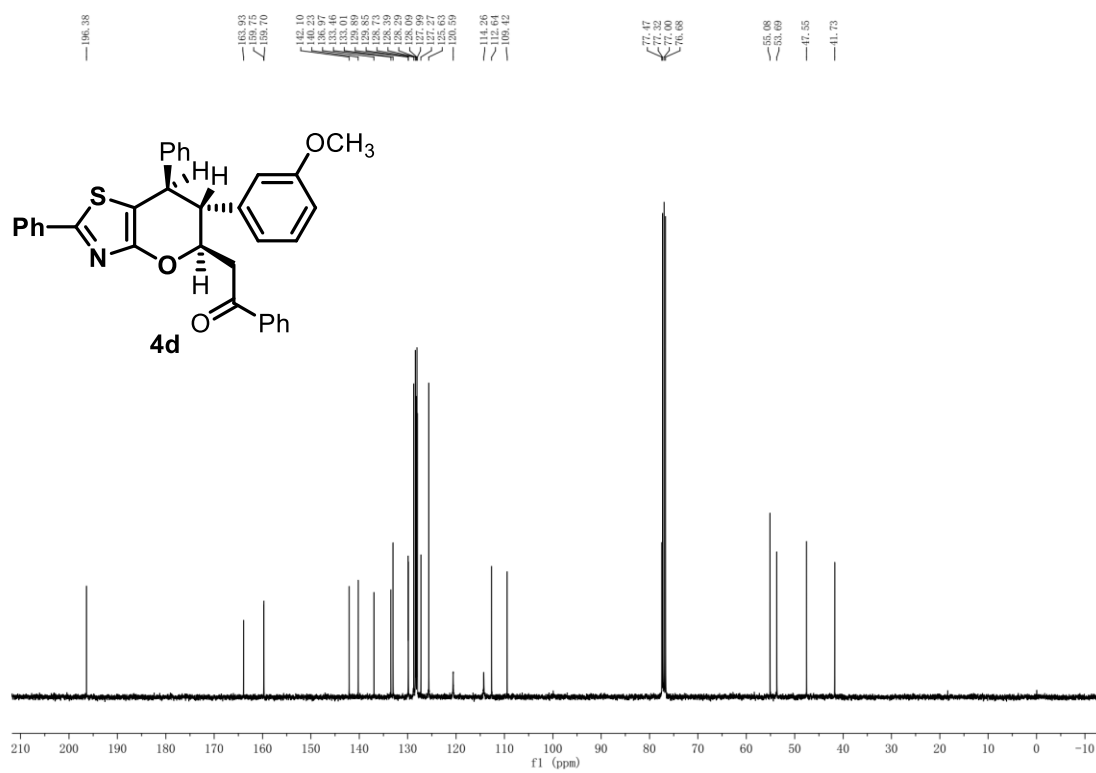

<sup>1</sup>H NMR of 4e (400M, CDCl<sub>3</sub>)

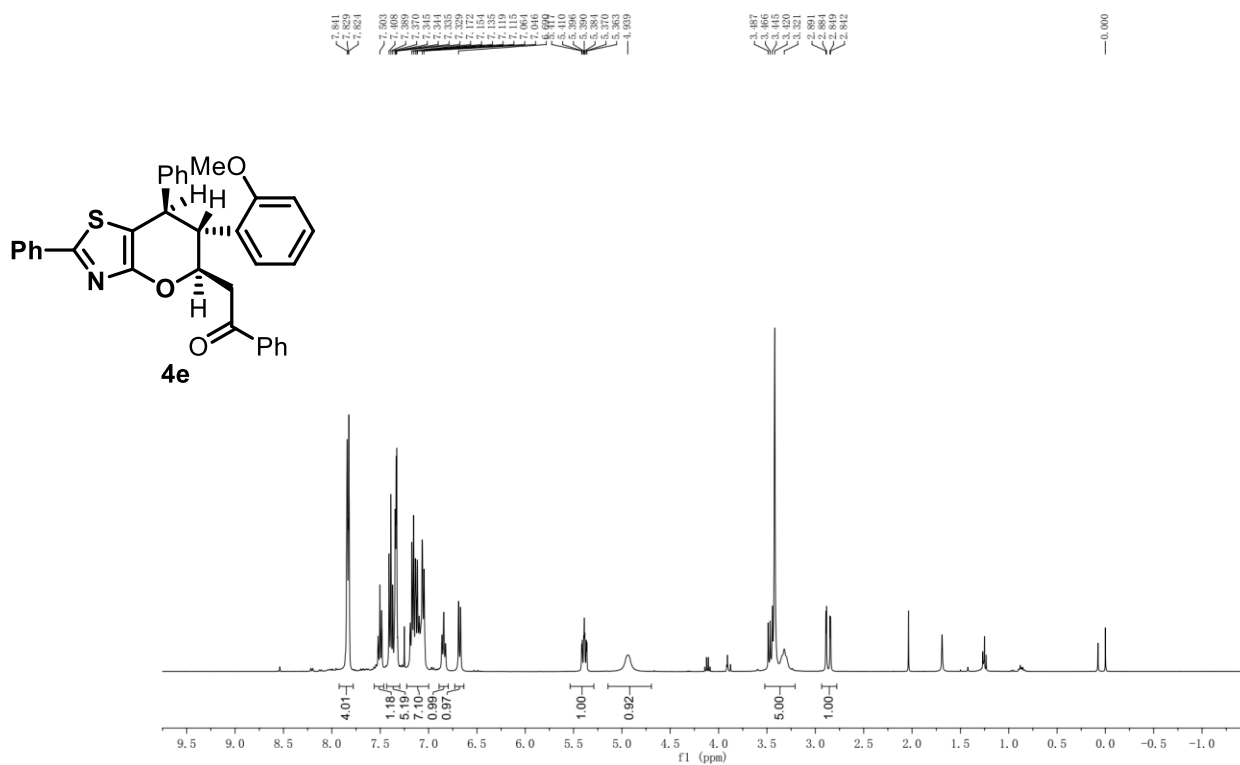

Crude <sup>1</sup>H NMR of 4e (400M, CDCl<sub>3</sub>)

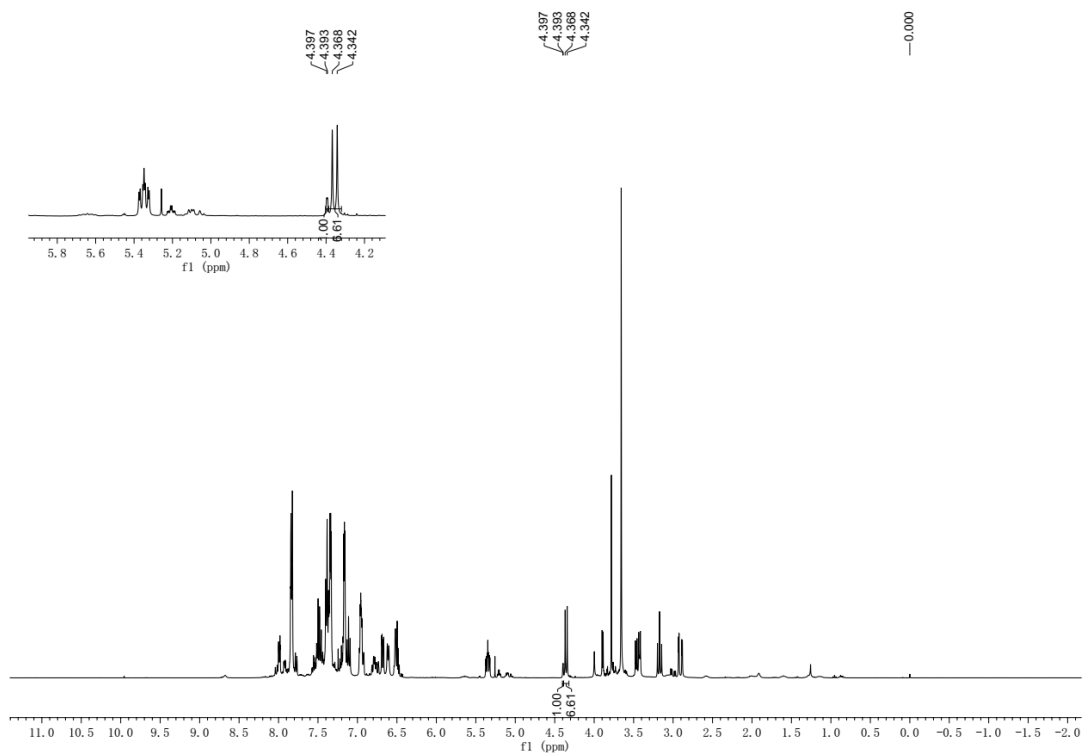

$^{13}\text{C}$ NMR of **4e** (101M,  $\text{CDCl}_3$ )

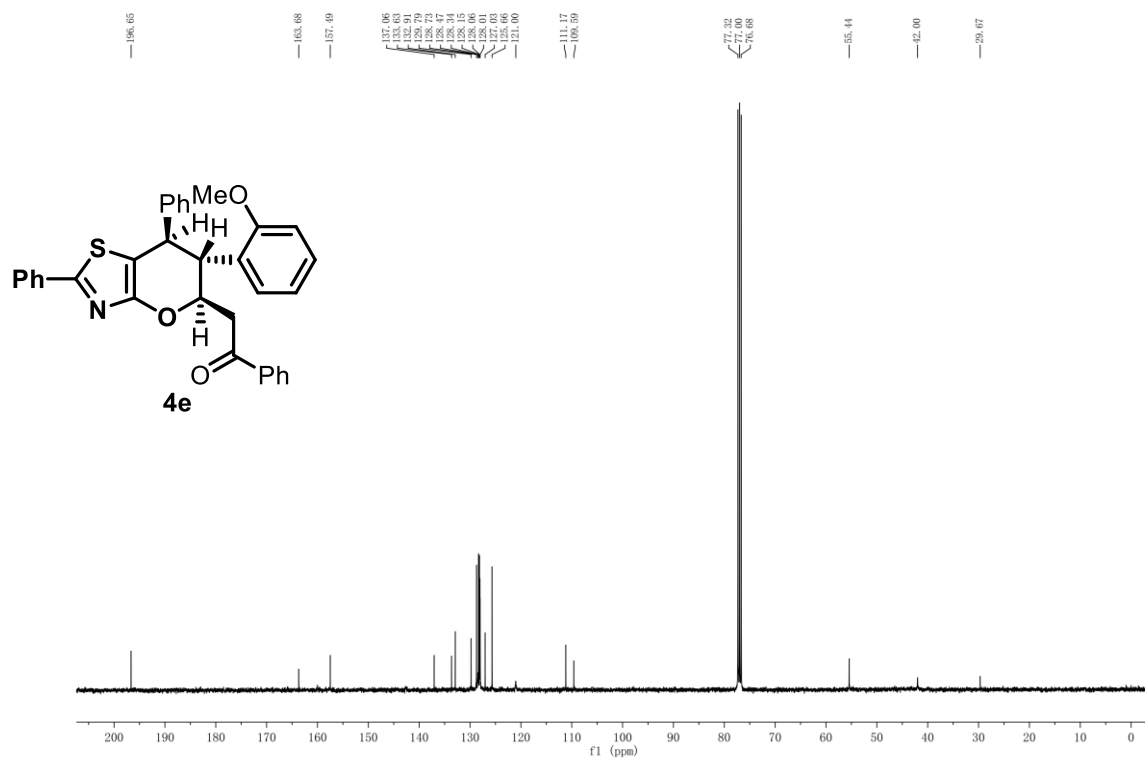

$^1\text{H NMR}$  of **4f** (400M,  $\text{CDCl}_3$ )

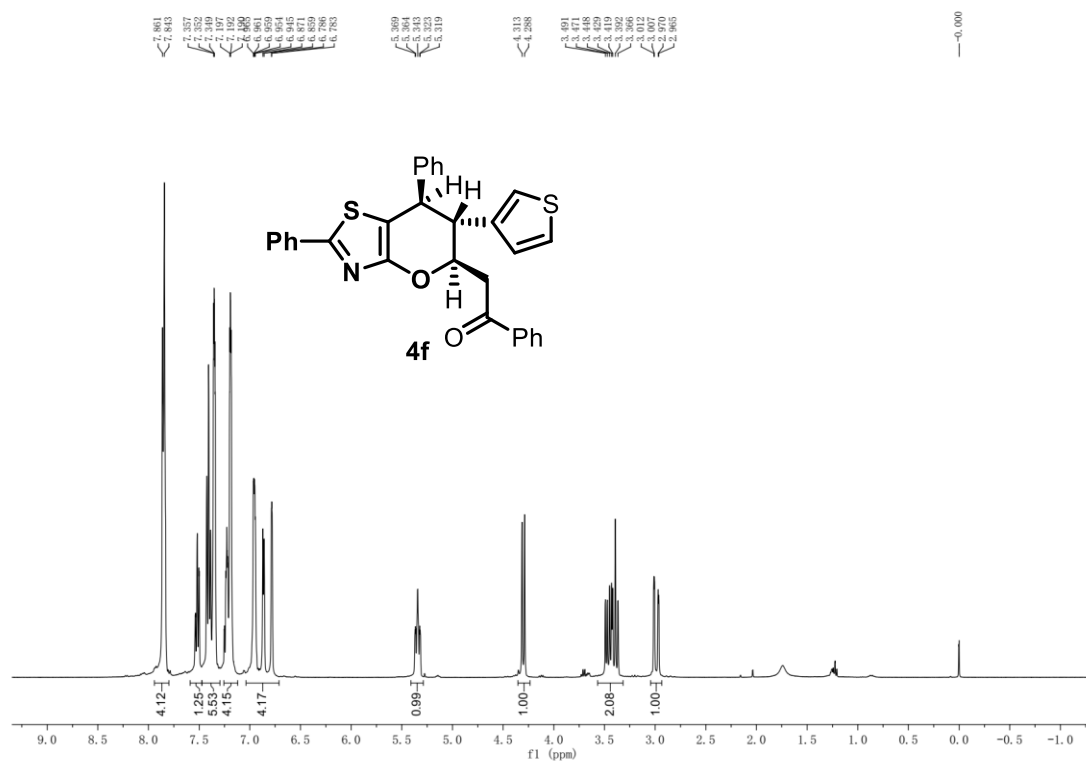

Crude  $^1\text{H NMR}$  of **4e** (400M,  $\text{CDCl}_3$ )

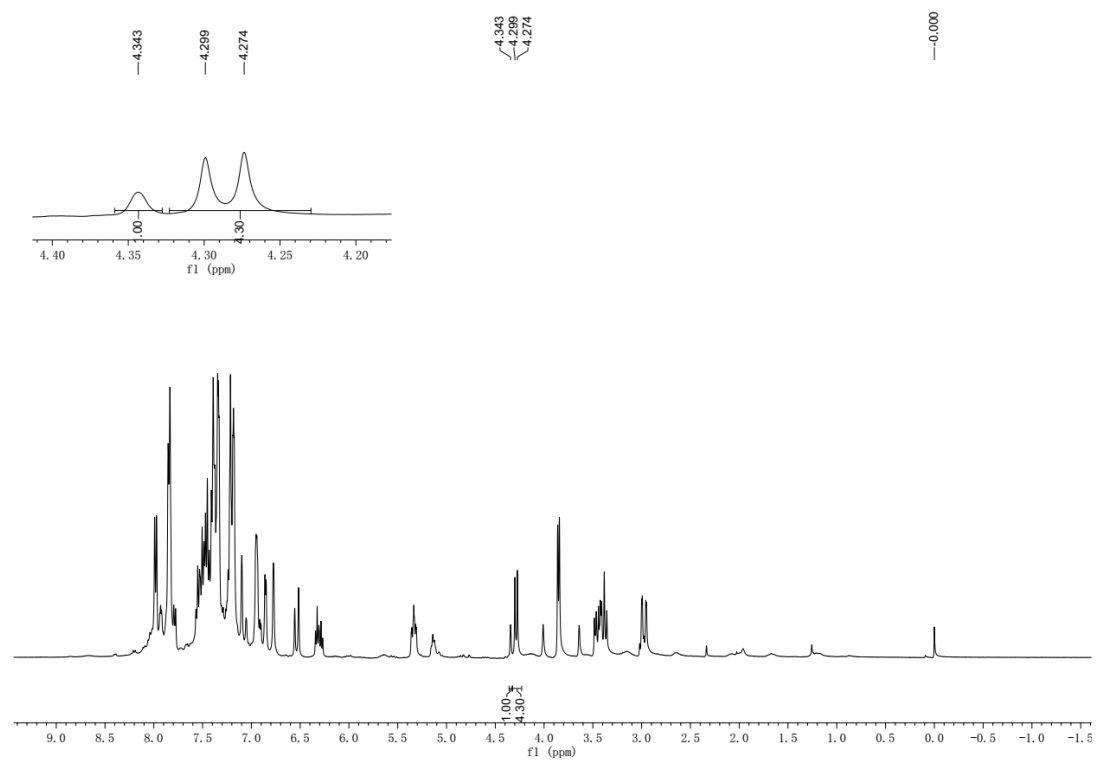

$^{13}\text{C}$ NMR of **4f** (101M,  $\text{CDCl}_3$ )

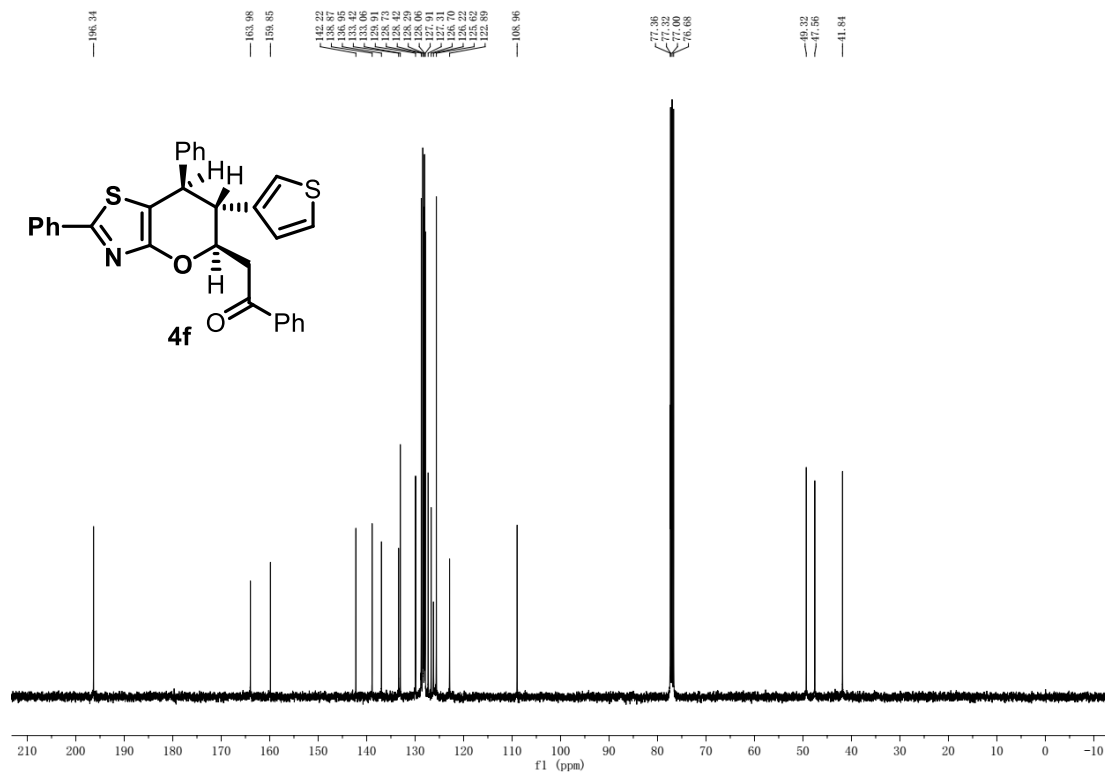

$^1\text{H}$ NMR of **4g** (400M,  $\text{CDCl}_3$ )

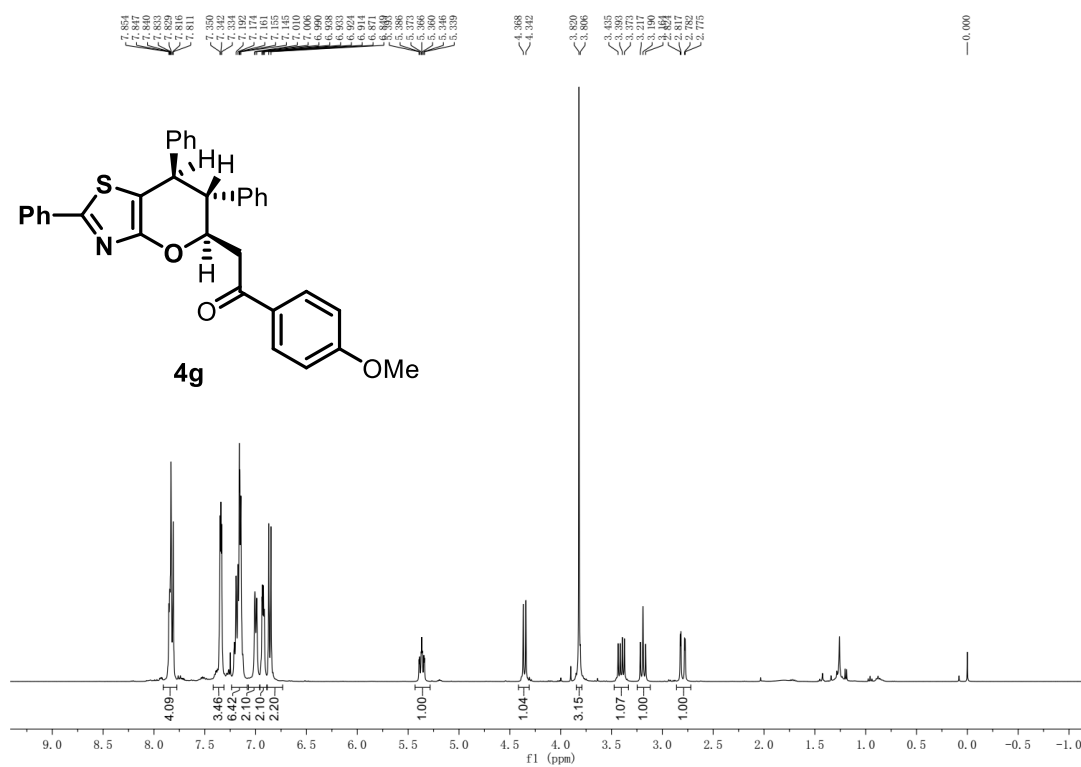

Crude  $^1\text{H}$  NMR of **4e** (400M,  $\text{CDCl}_3$ )

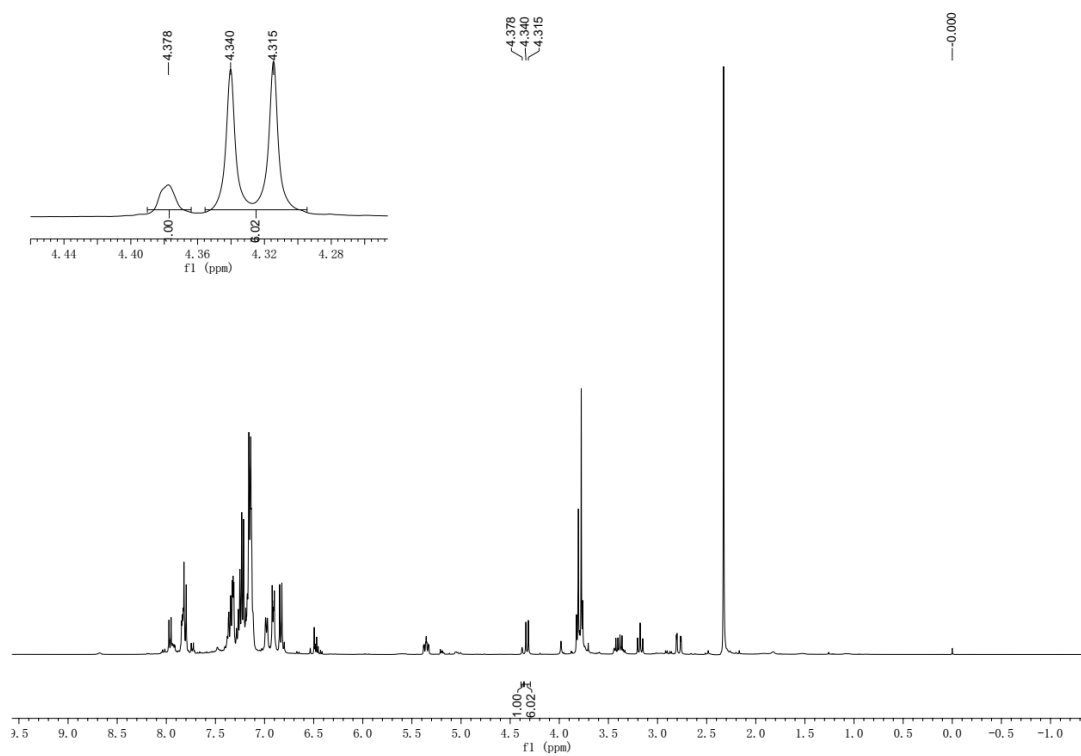

<sup>13</sup>CNMR of **4g** (101M, CDCl<sub>3</sub>)

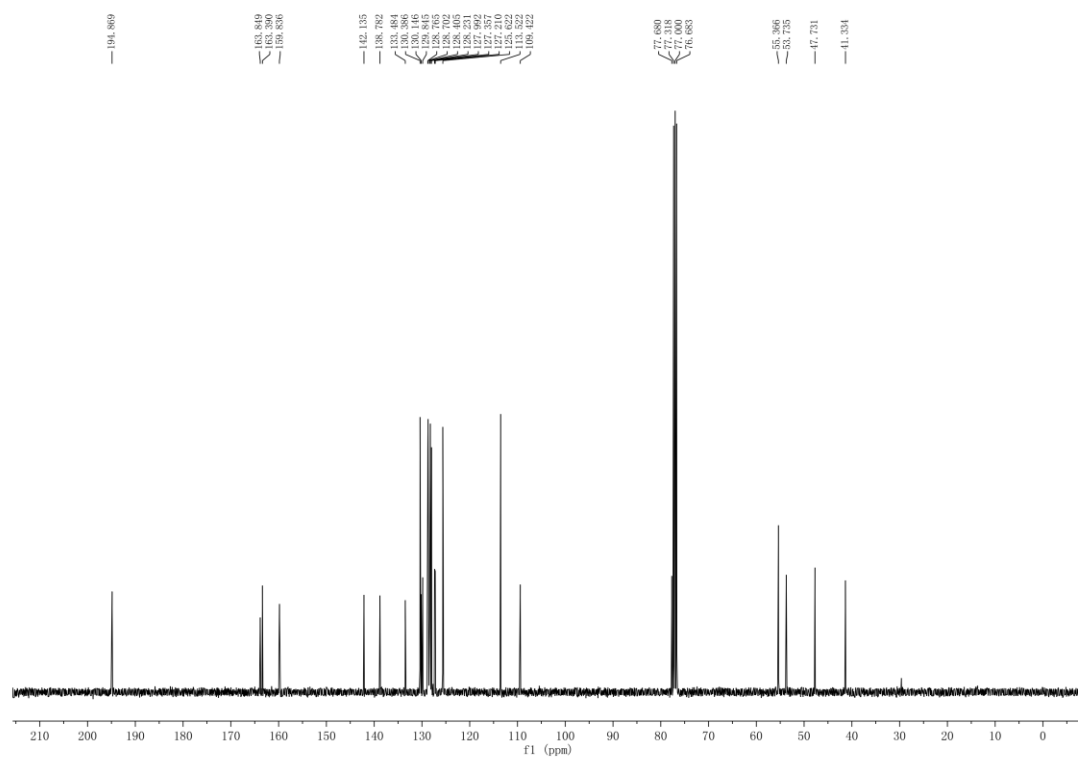



<sup>1</sup>H NMR of **4h** (400M, CDCl<sub>3</sub>)

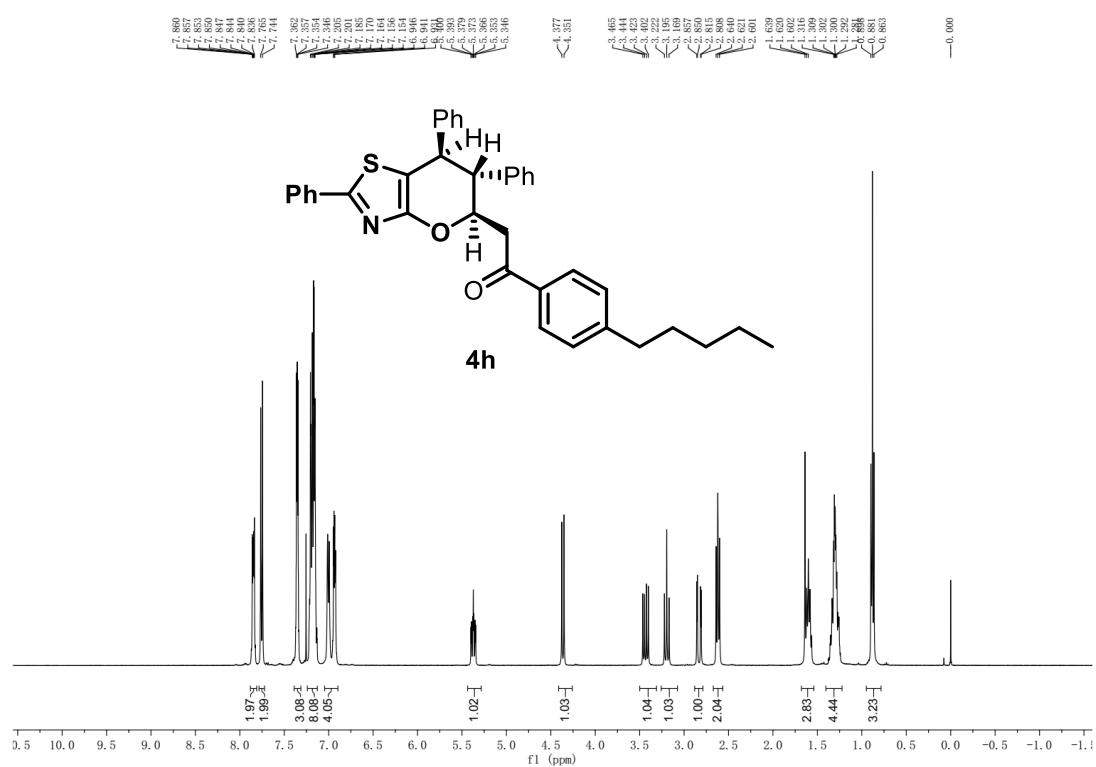

Crude <sup>1</sup>H NMR of **4h** (400M, CDCl<sub>3</sub>)

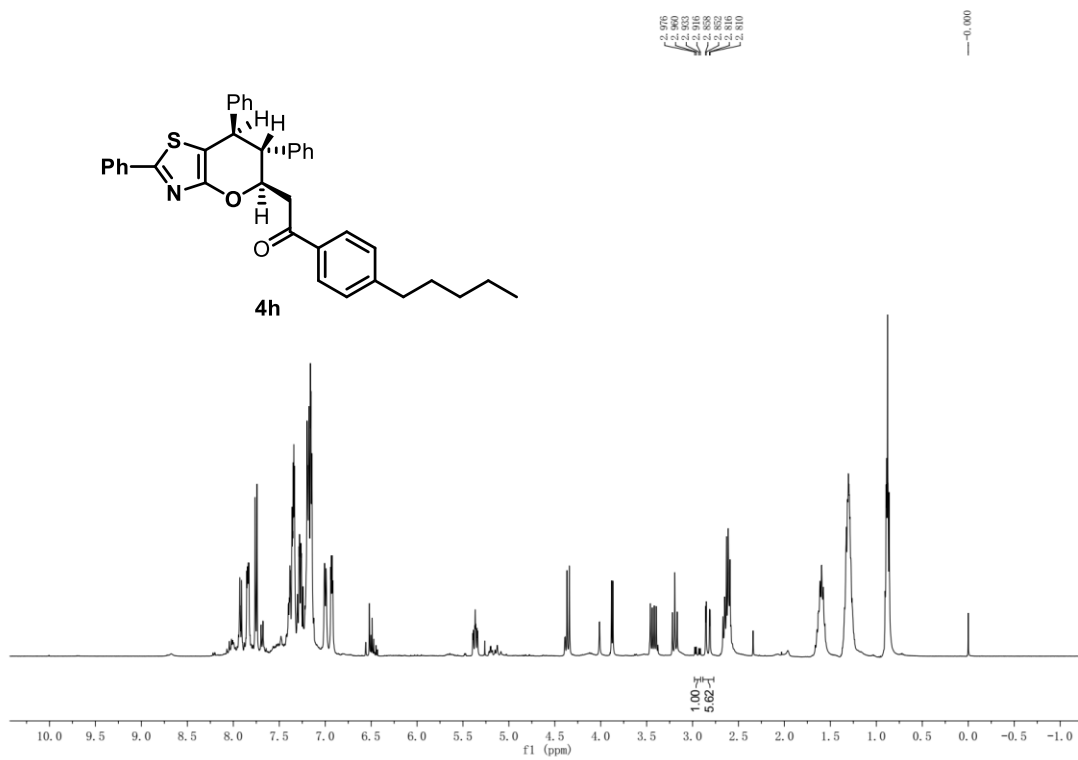

<sup>13</sup>CNMR of **4h** (101M, CDCl<sub>3</sub>)

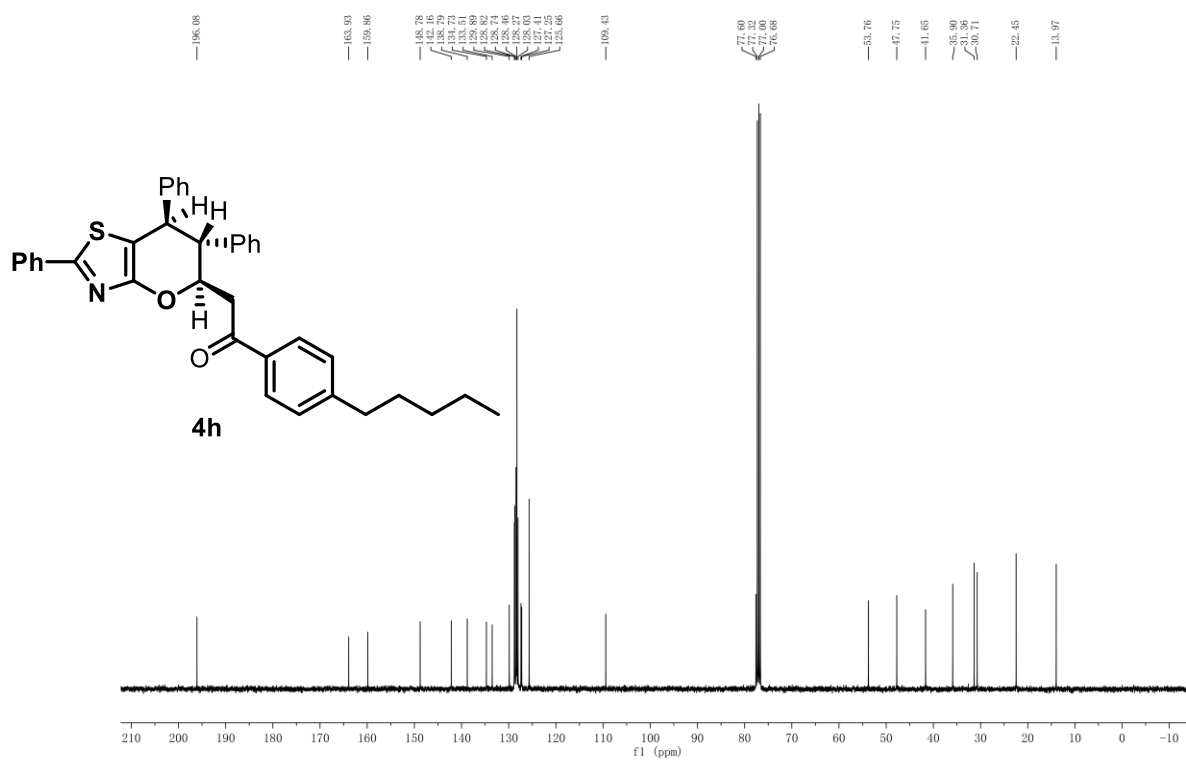



<sup>13</sup>CNMR of **4i** (101M, CDCl<sub>3</sub>)

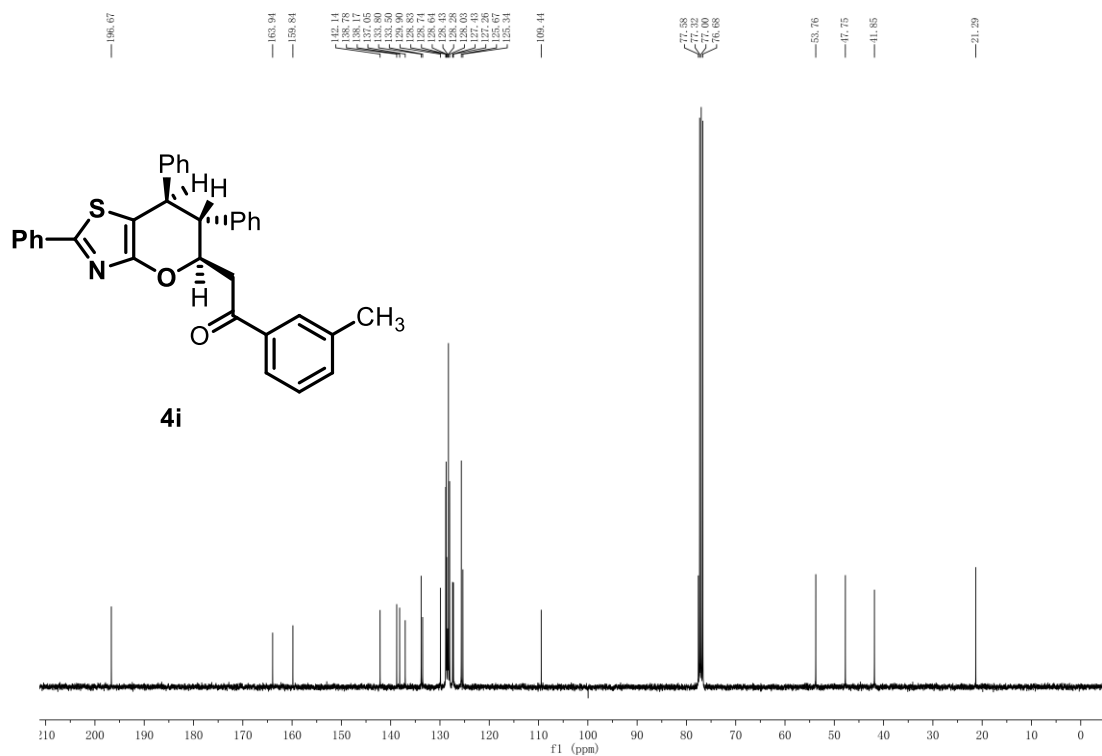

$^1\text{H}$ NMR of **4j** (400M,  $\text{CDCl}_3$ )

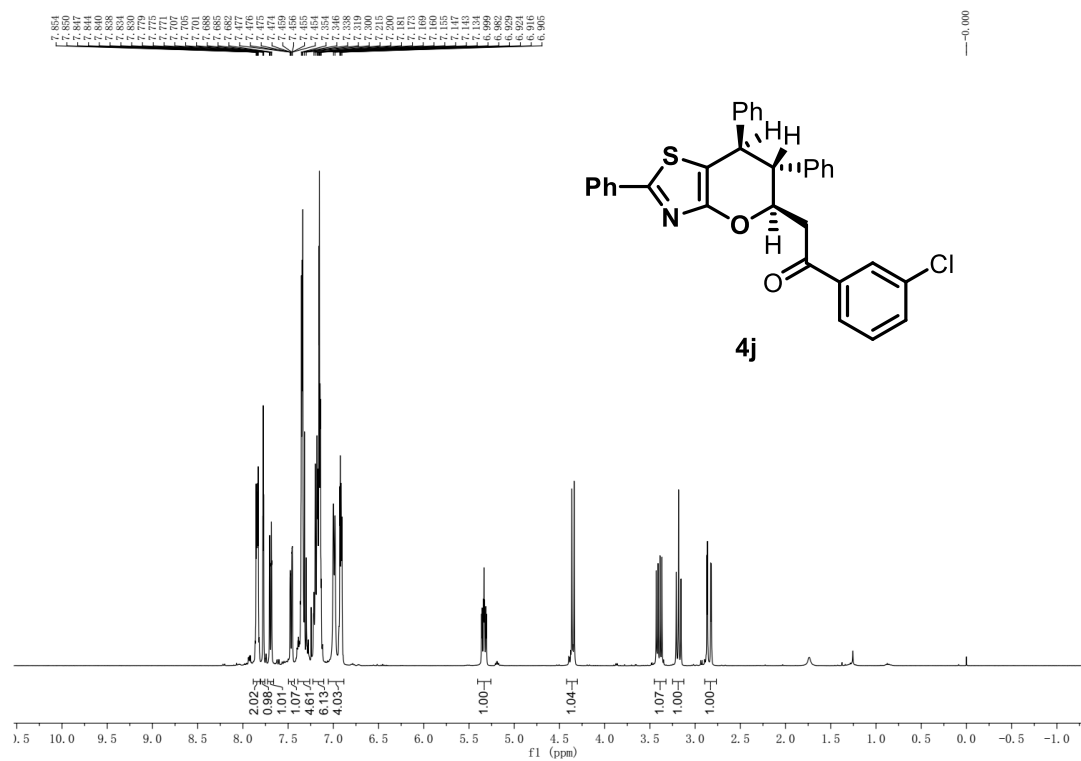

Crude  $^1\text{H}$  NMR of **4j** (400M,  $\text{CDCl}_3$ )

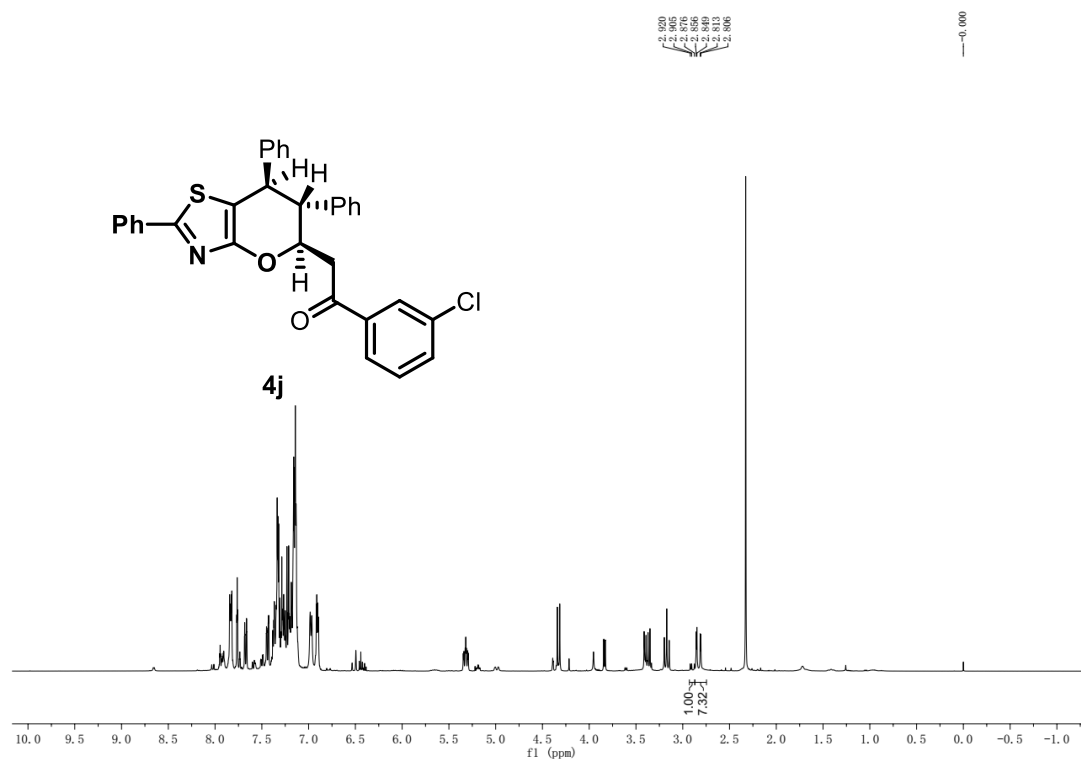

<sup>13</sup>CNMR of **4j** (101M, CDCl<sub>3</sub>)

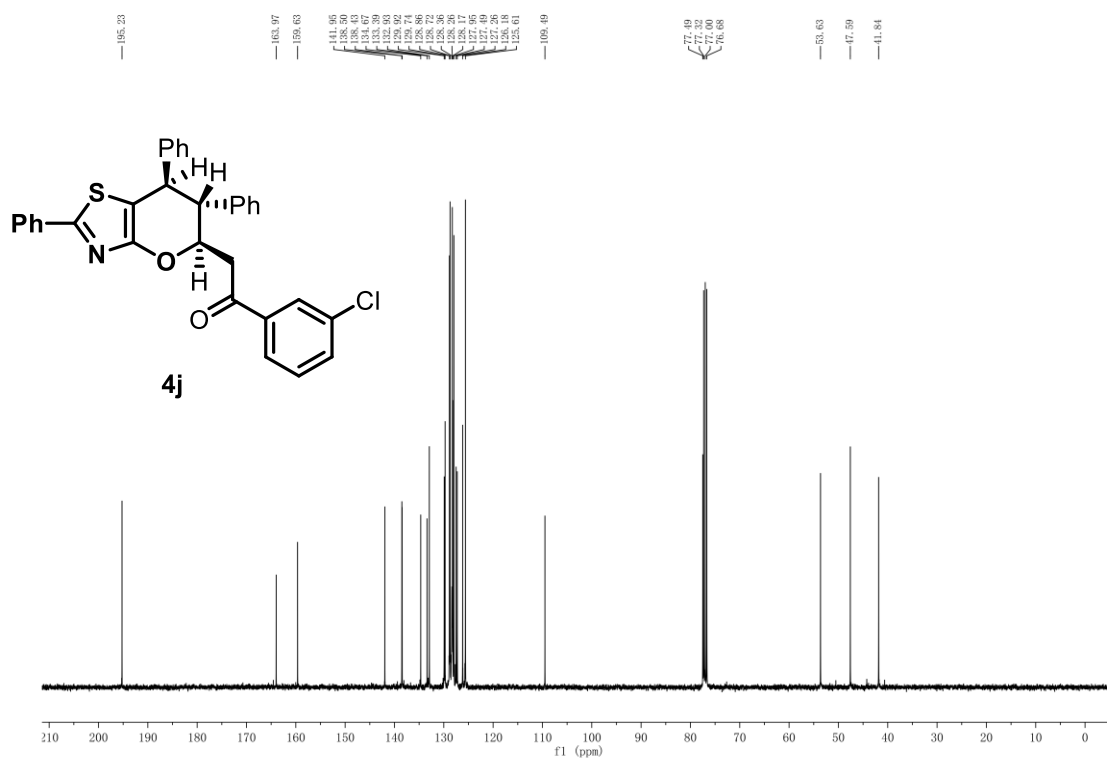

<sup>1</sup>HNMR of **4k** (400M, CDCl<sub>3</sub>)

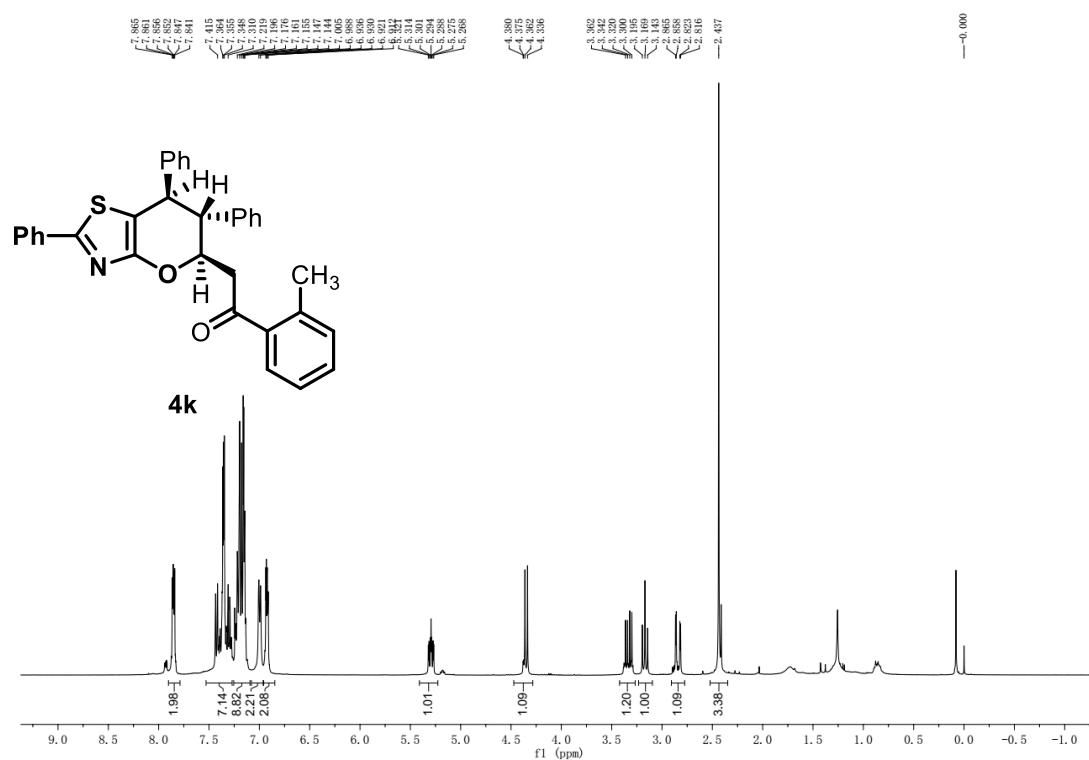

Crude <sup>1</sup>HNMR of **4k** (400M, CDCl<sub>3</sub>)

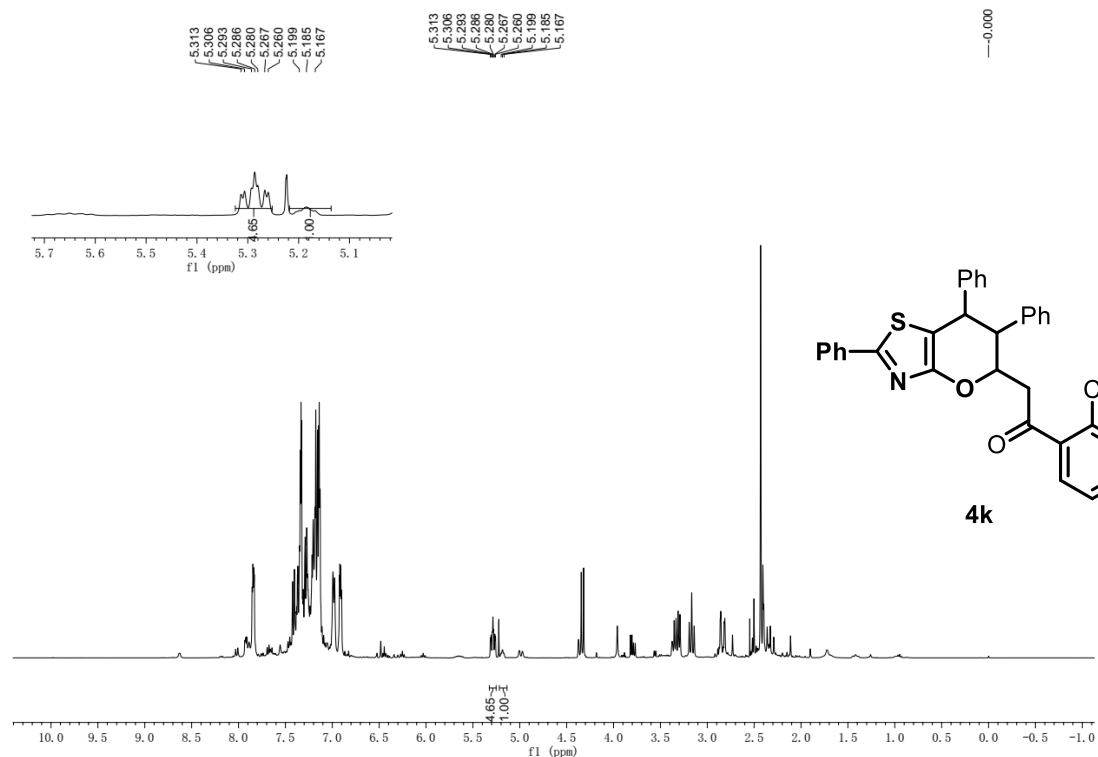

<sup>13</sup>CNMR of **4k** (101M, CDCl<sub>3</sub>)

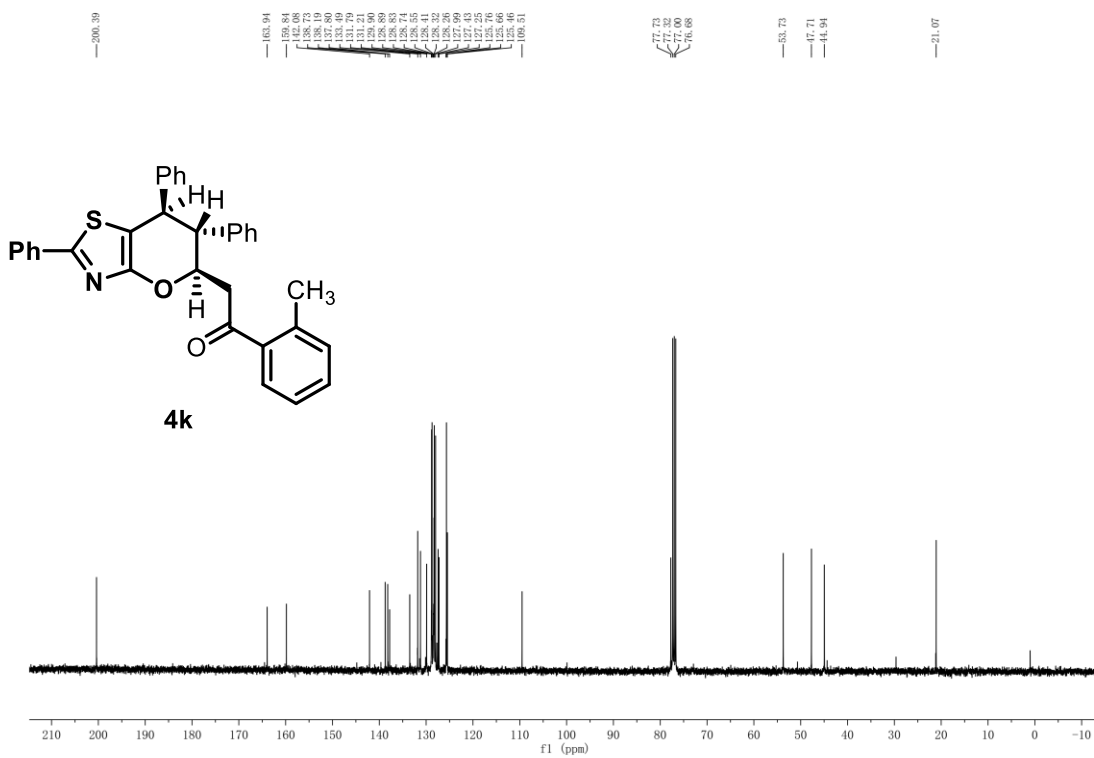



<sup>1</sup>HNMR of **4I** (400M, CDCl<sub>3</sub>)

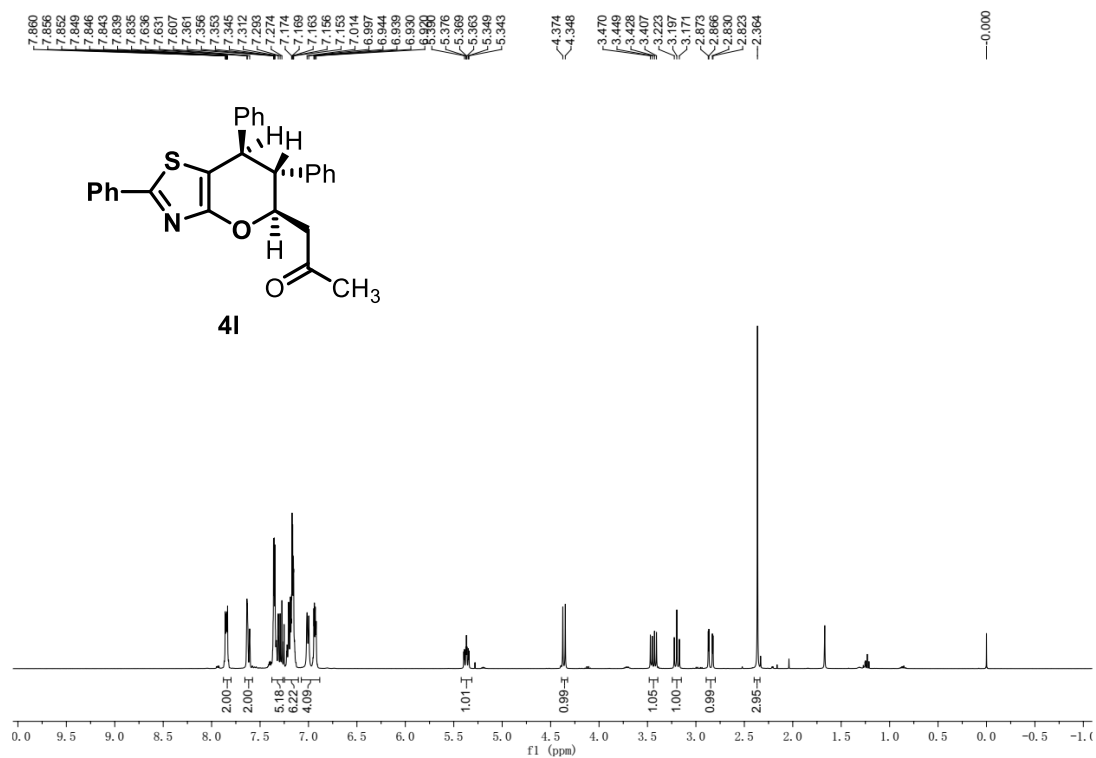

Curde <sup>1</sup>HNMR of **4I** (400M, CDCl<sub>3</sub>)

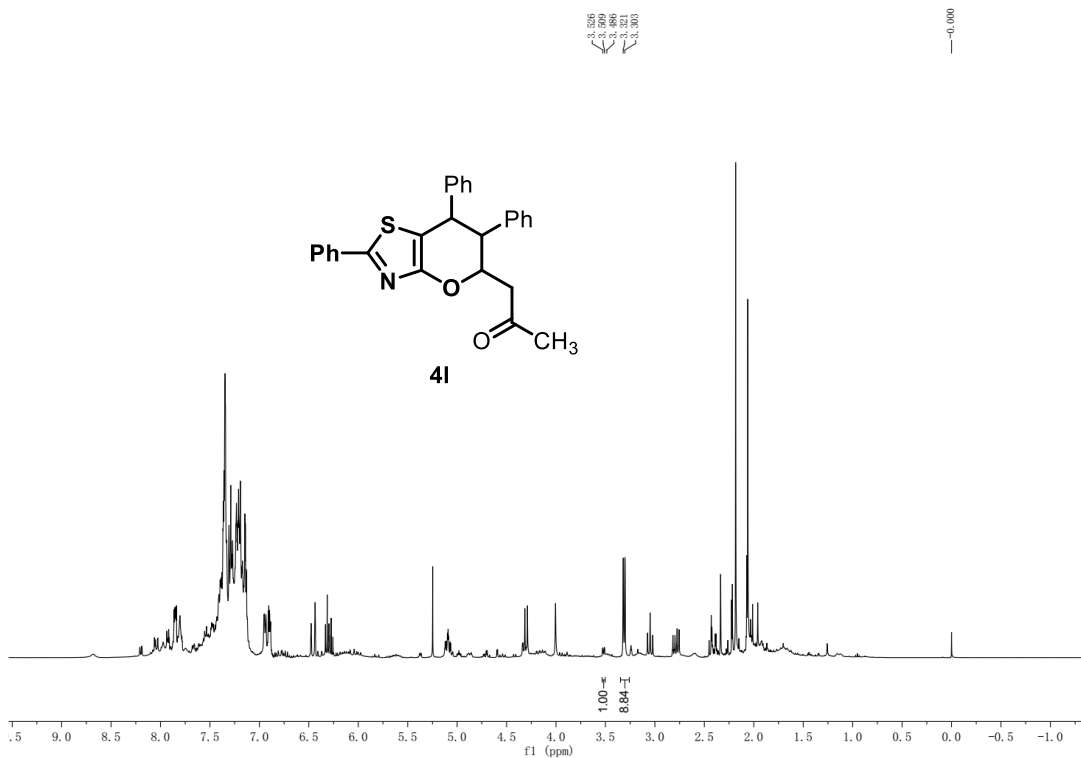

<sup>13</sup>CNMR of **4k** (101M, CDCl<sub>3</sub>)

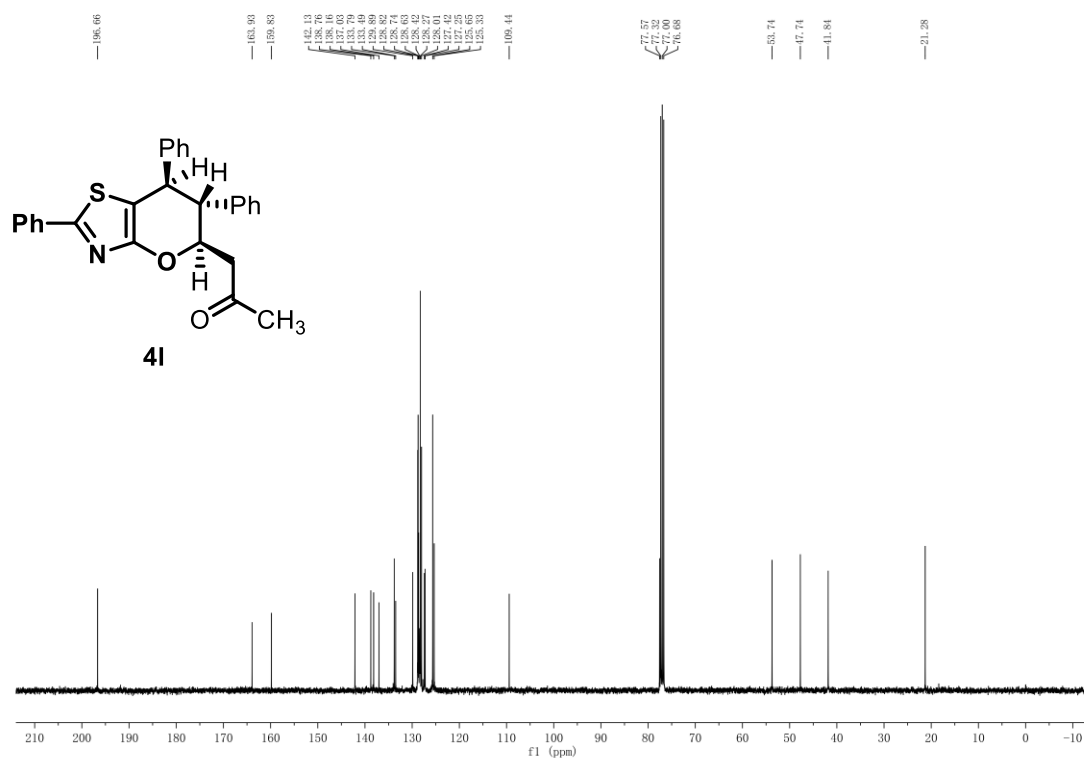

<sup>1</sup>HNMR of **5a** (600M, CDCl<sub>3</sub>)

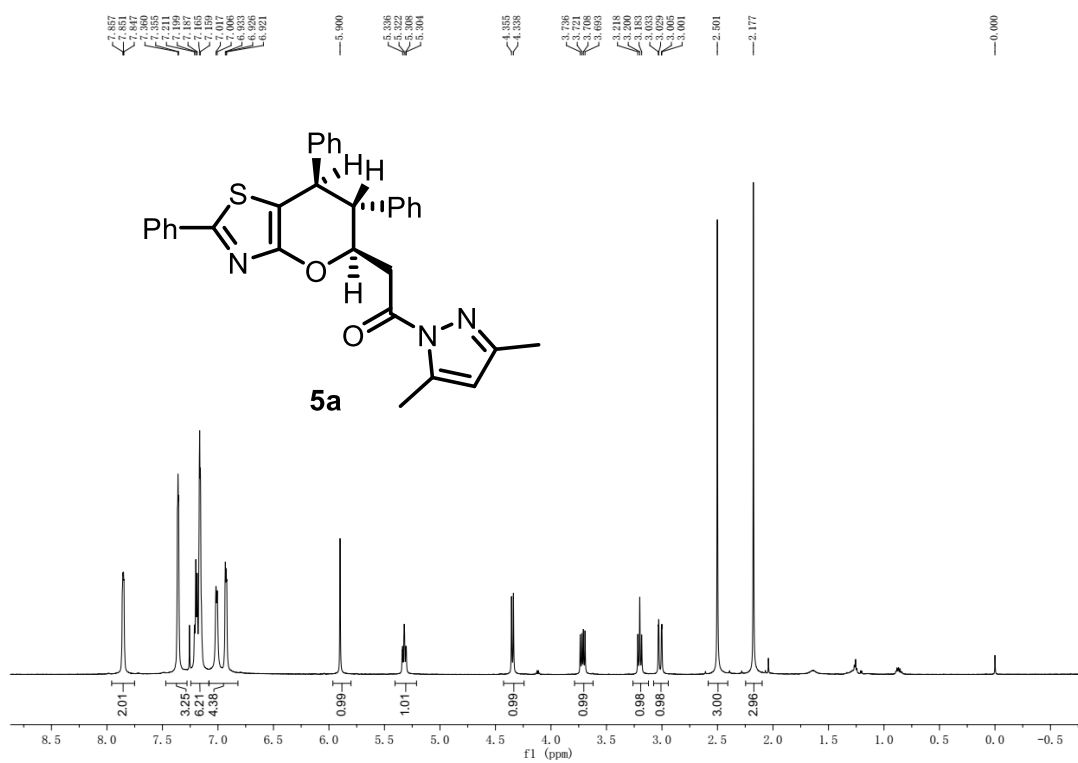

Crude <sup>1</sup>HNMR of **5a** (600M, CDCl<sub>3</sub>)

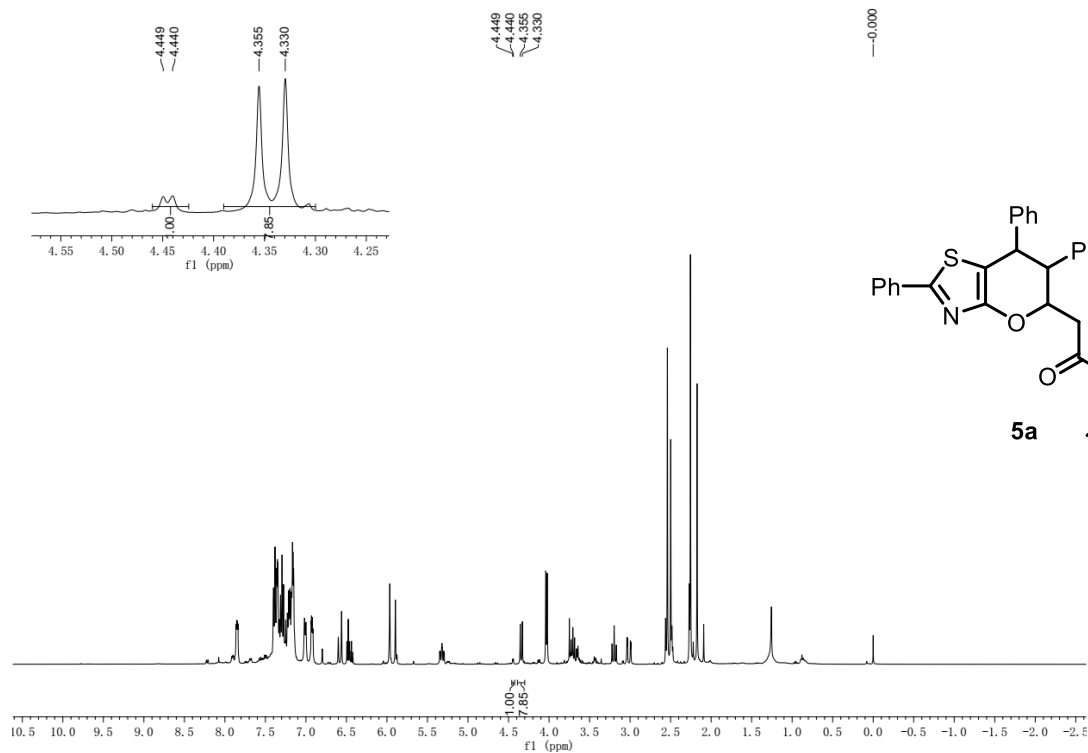

$^{13}\text{C}$ NMR of **5a** (101M,  $\text{CDCl}_3$ )

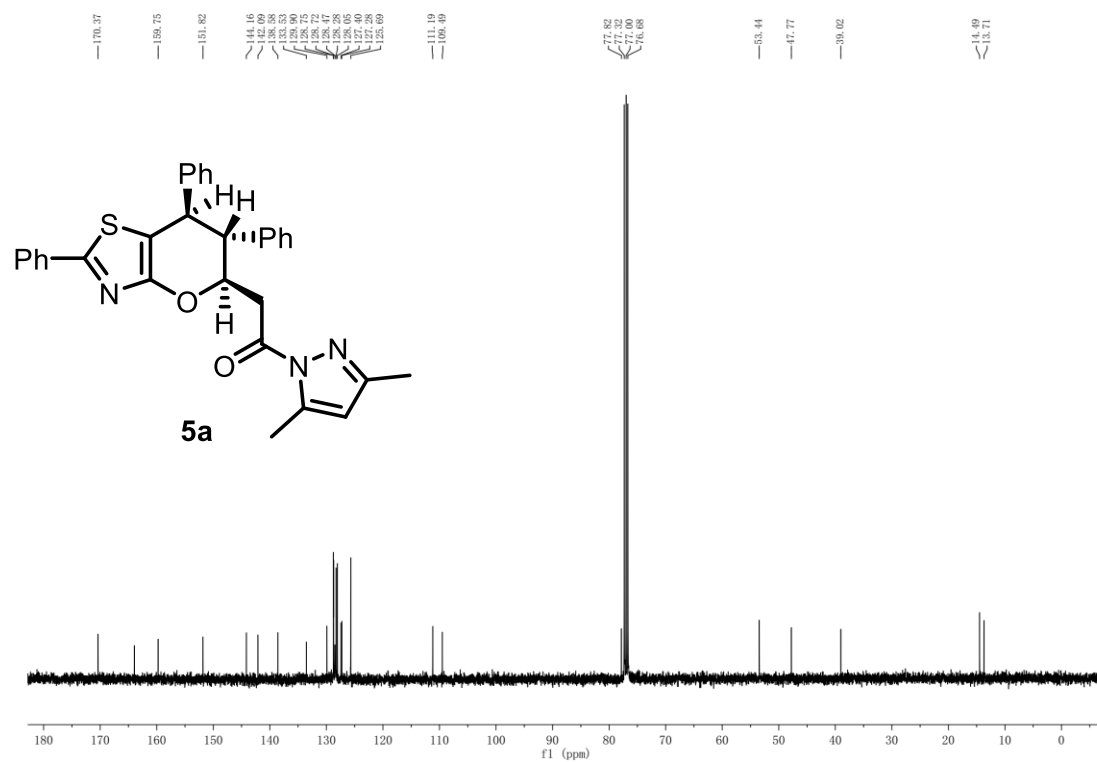



$^{13}\text{C}$ NMR of **5b** (101M,  $\text{CDCl}_3$ )

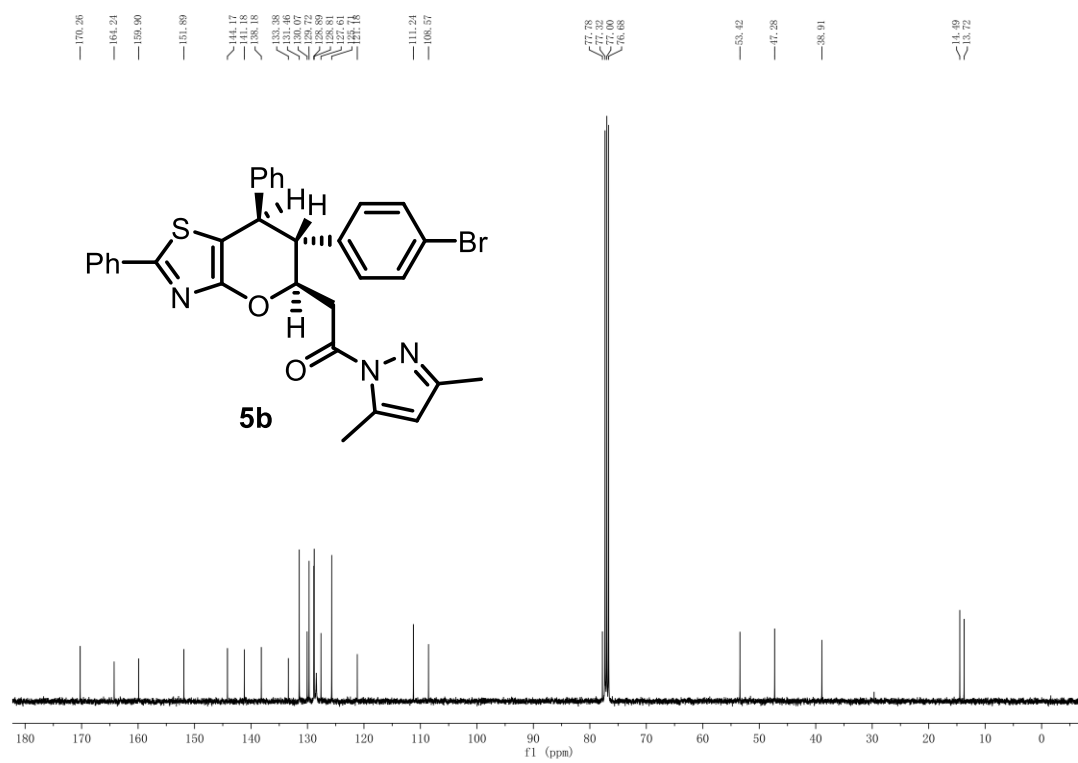



<sup>13</sup>CNMR of **5c** (101M, CDCl<sub>3</sub>)

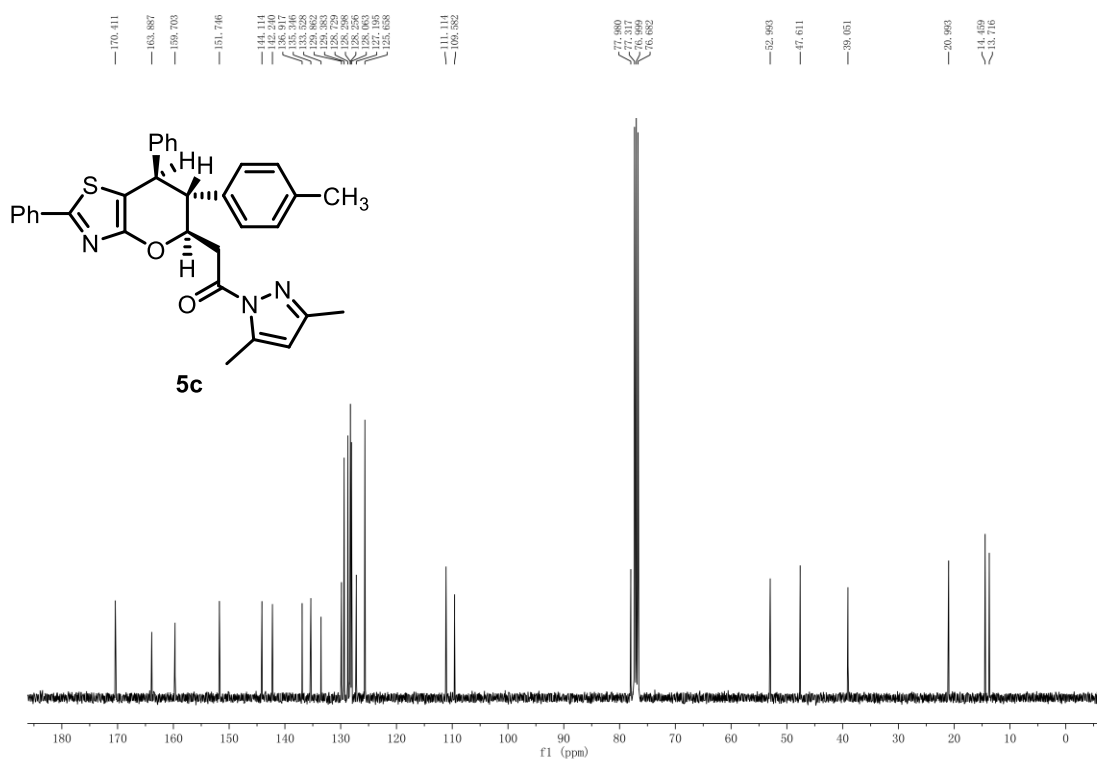



$^1\text{H}$ NMR of **5d** (400M,  $\text{CDCl}_3$ )

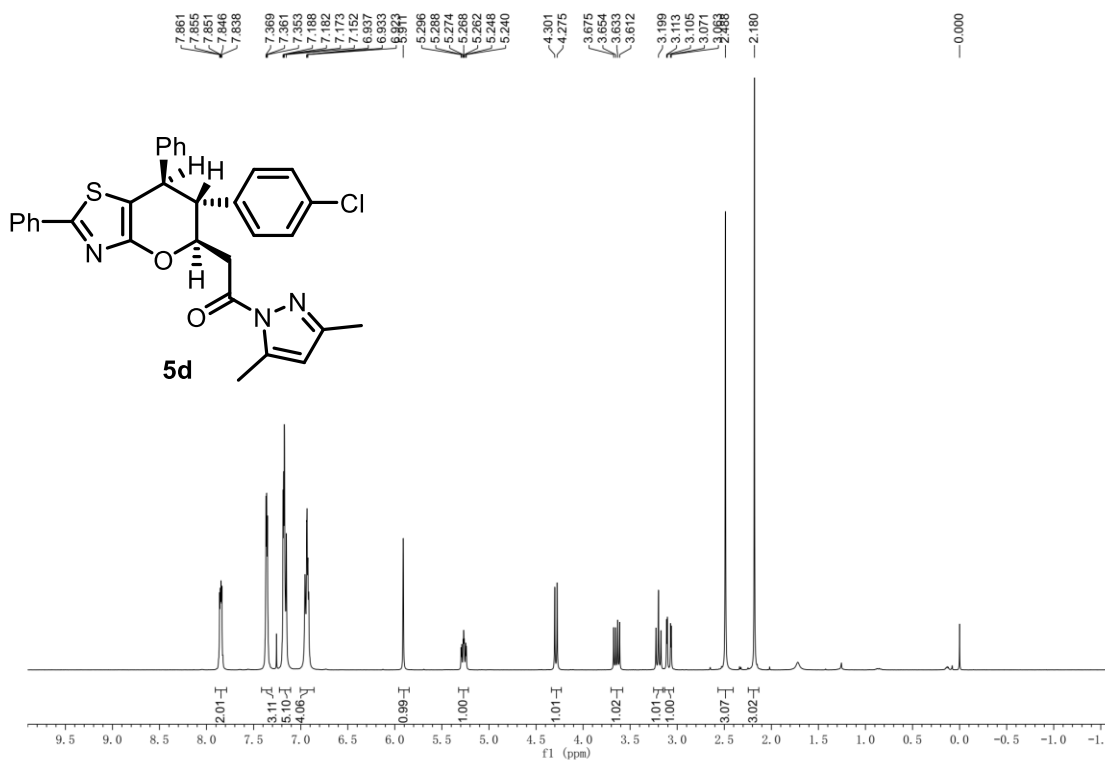

Crude  $^1\text{H}$ NMR of **5d** (400M,  $\text{CDCl}_3$ )

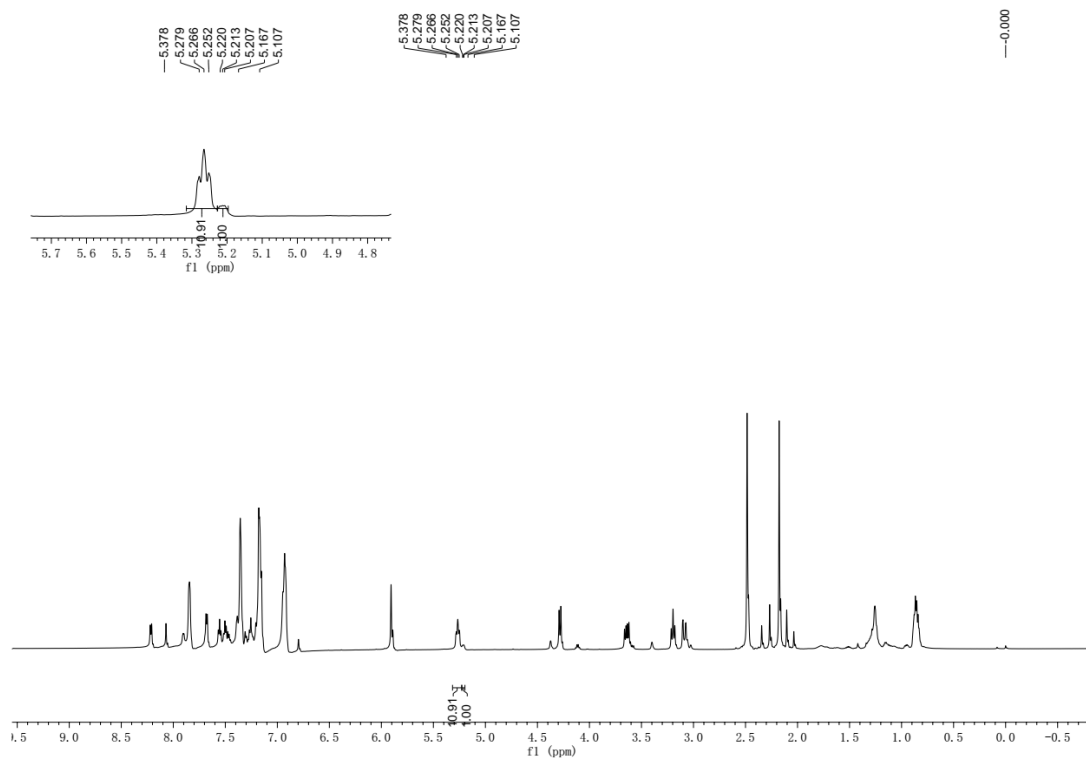

$^{13}\text{C}$ NMR of **5d** (101M,  $\text{CDCl}_3$ )

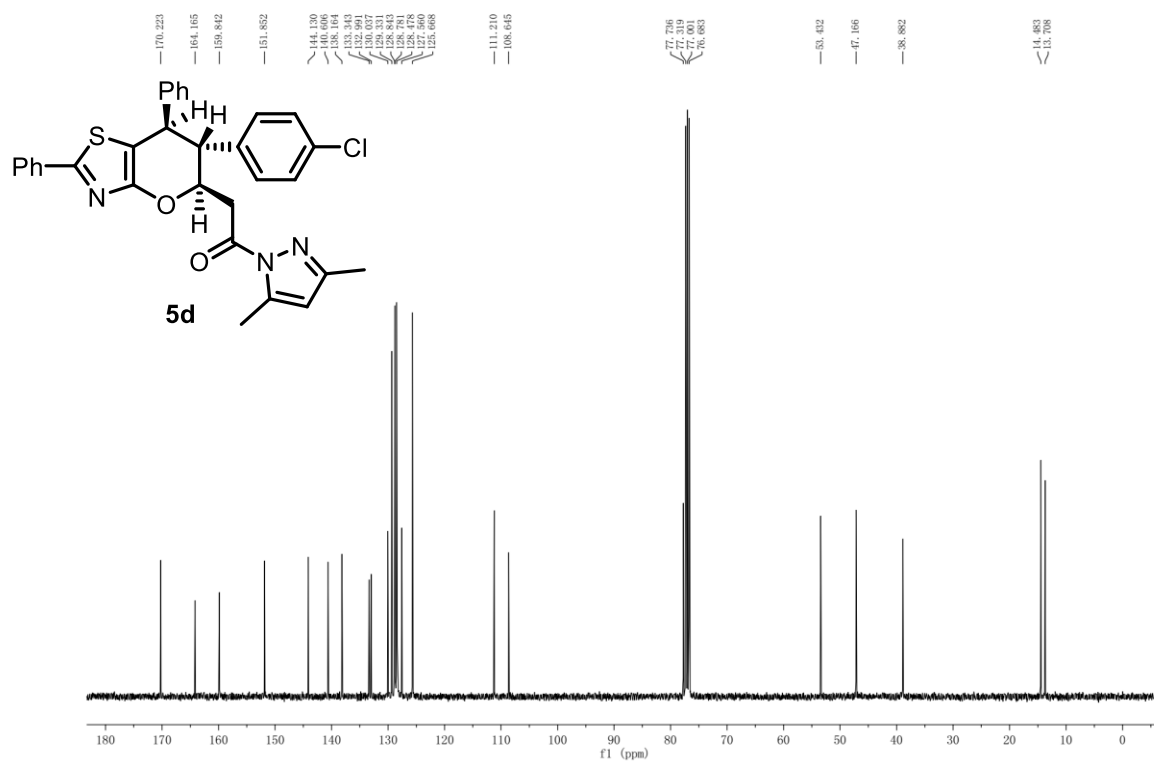

<sup>1</sup>HNMR of **5e** (400M, CDCl<sub>3</sub>)

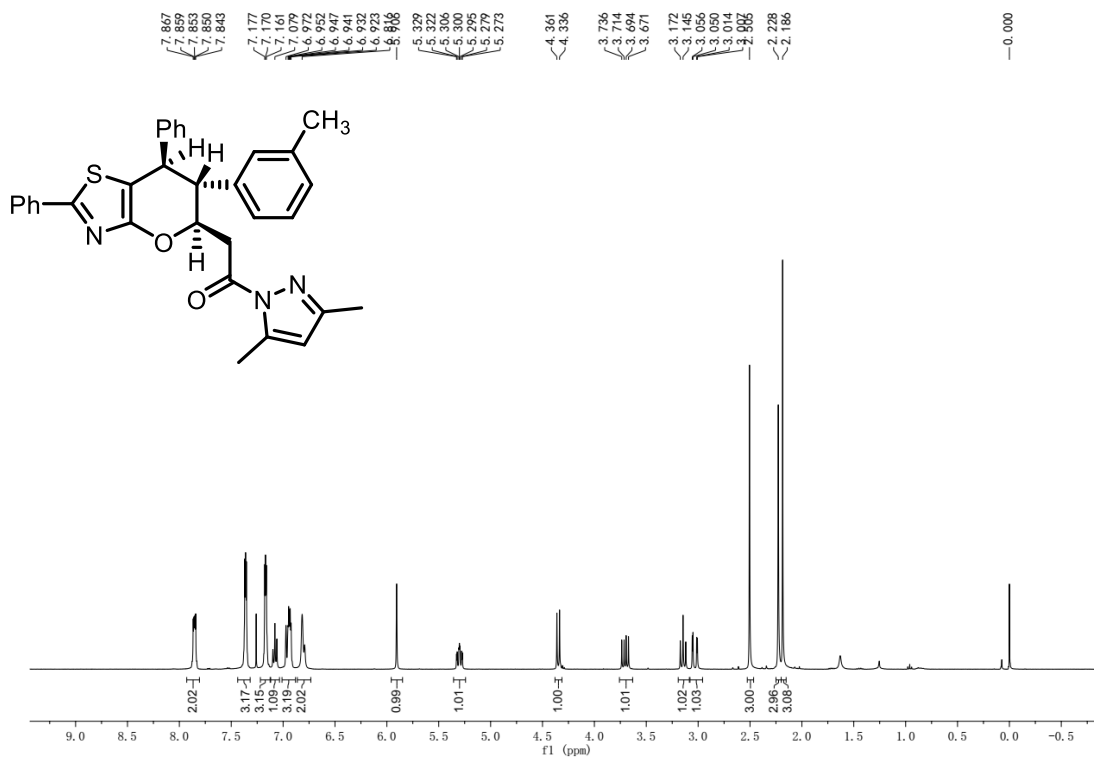

Crude <sup>1</sup>HNMR of **5e** (400M, CDCl<sub>3</sub>)

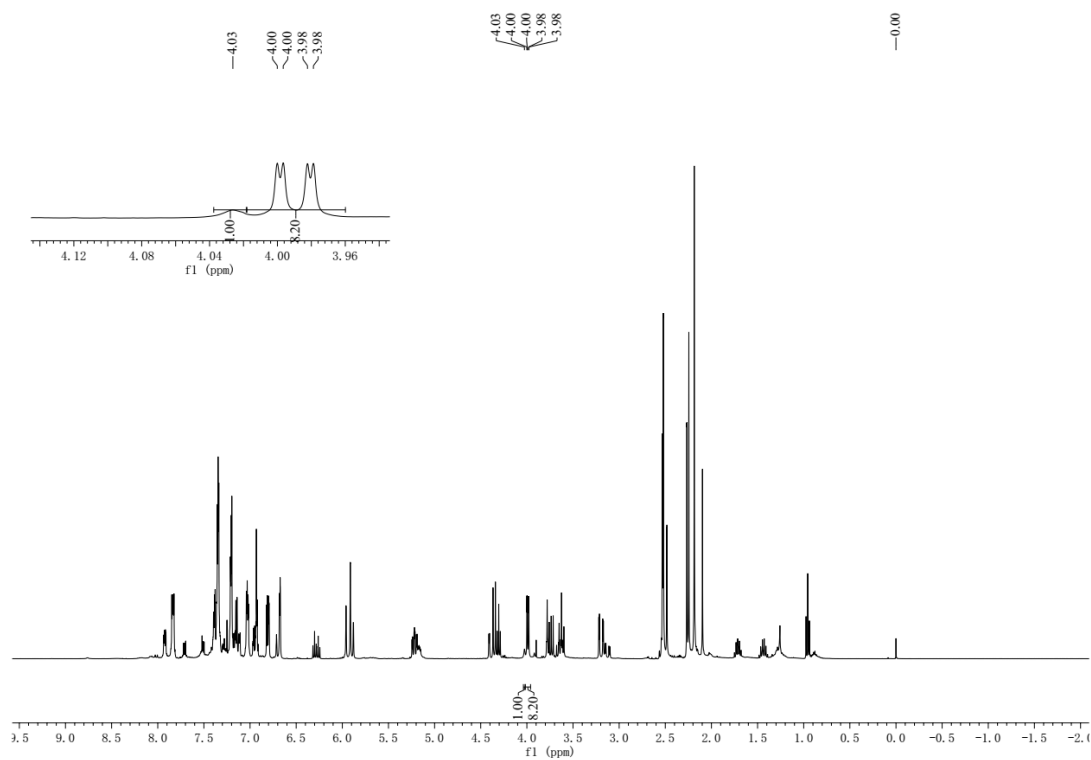

<sup>13</sup>CNMR of **5e** (101M, CDCl<sub>3</sub>)

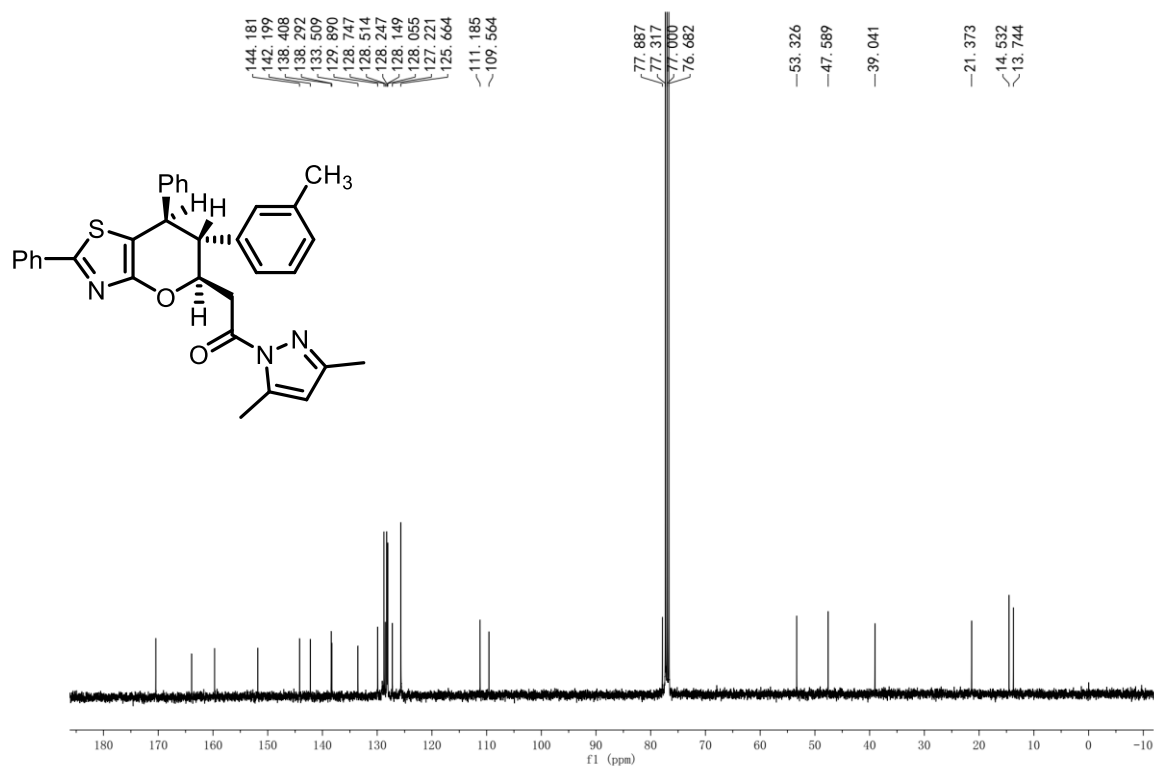

<sup>1</sup>HNMR of **5f** (400M, CDCl<sub>3</sub>)

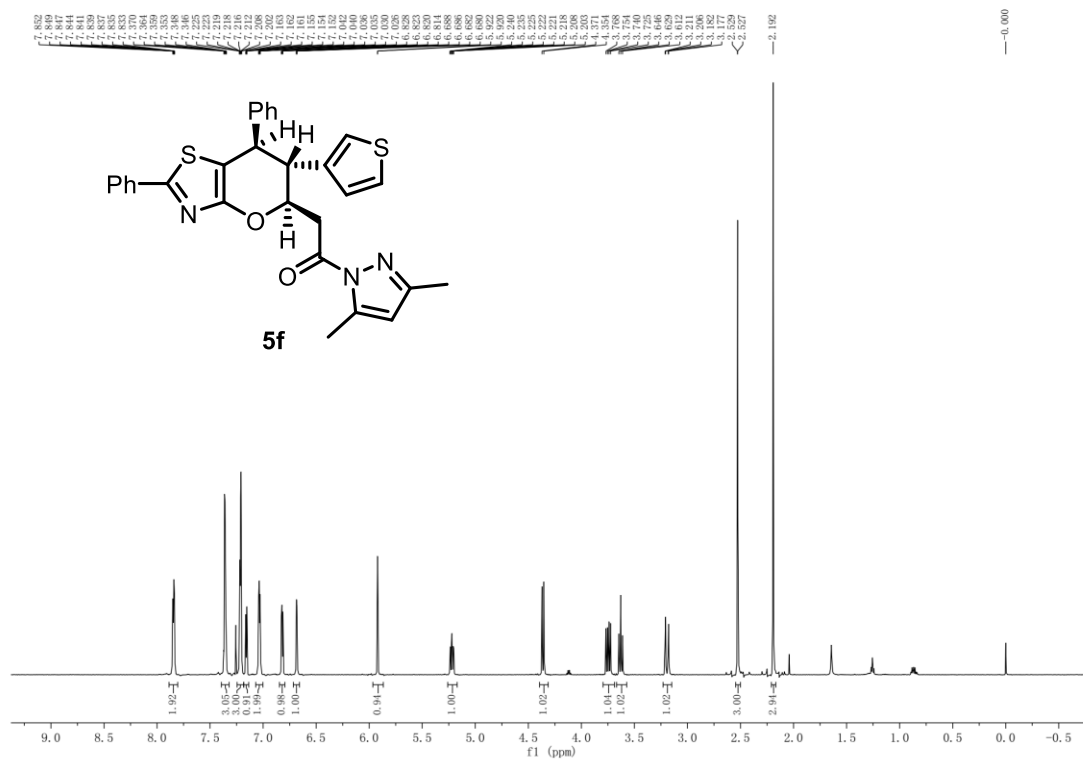

<sup>1</sup>HNMR of **5f** (400M, CDCl<sub>3</sub>)

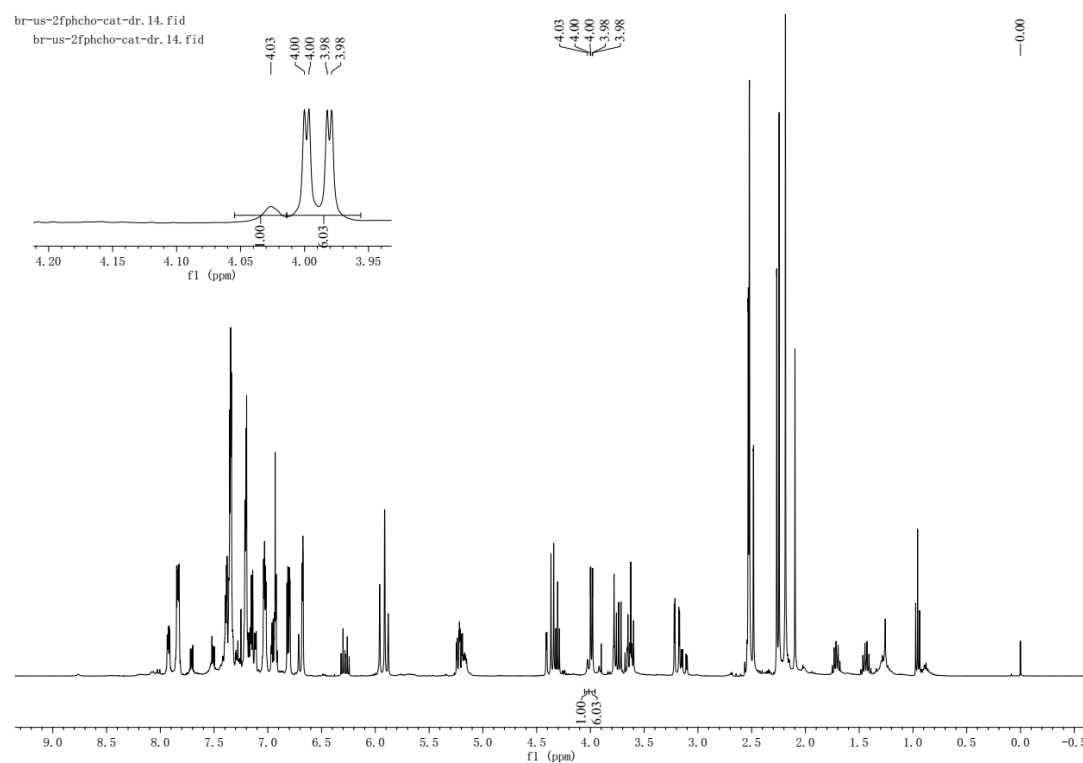

<sup>13</sup>CNMR of **5f** (101M, CDCl<sub>3</sub>)

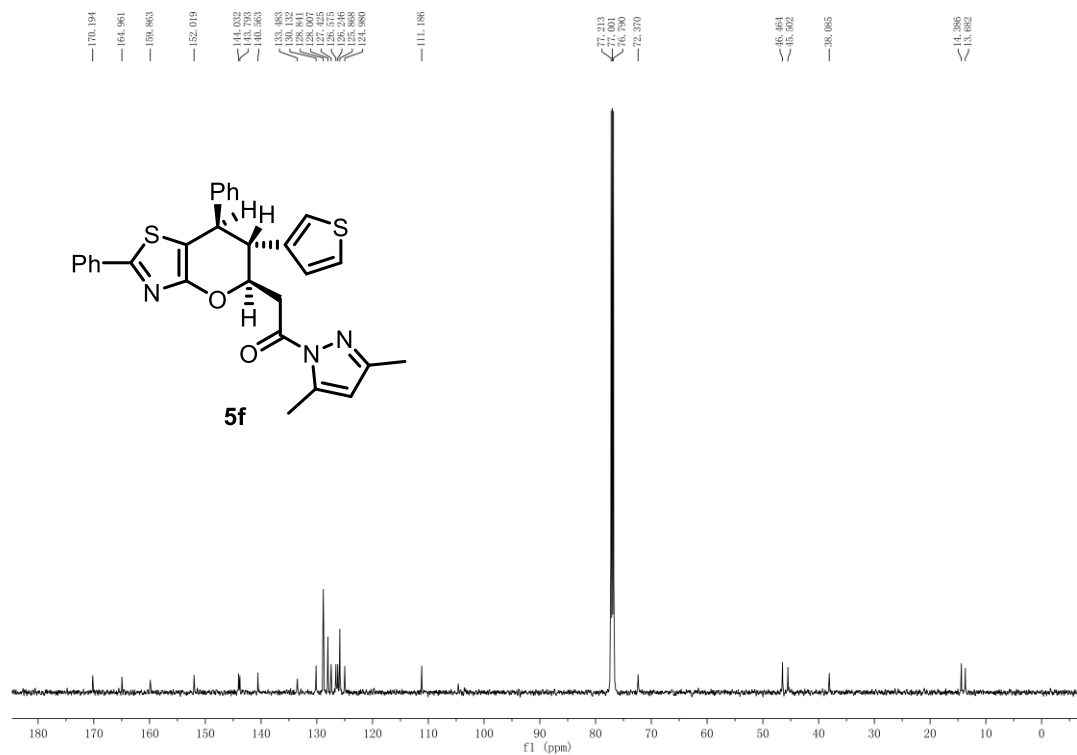

$^1\text{H}$ NMR of **5g** (400M,  $\text{CDCl}_3$ )

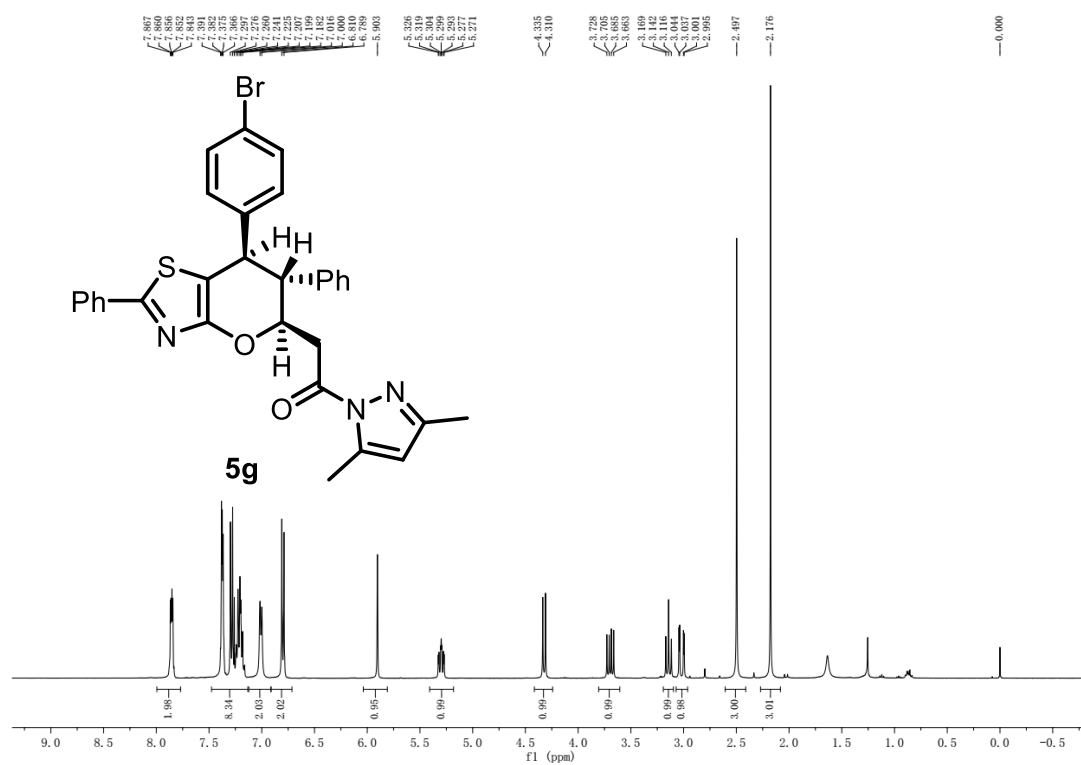

Crude  $^1\text{H}$ NMR of **5g** (400M,  $\text{CDCl}_3$ )

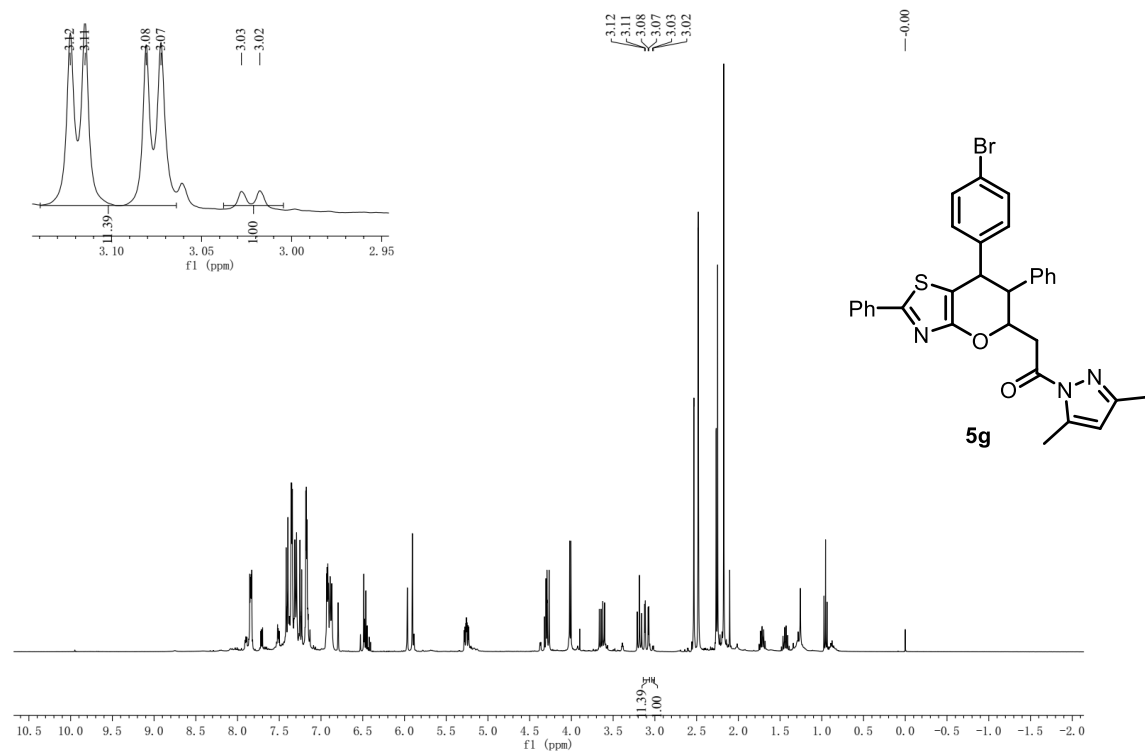

$^{13}\text{C}$ NMR of **5g** (101M,  $\text{CDCl}_3$ )

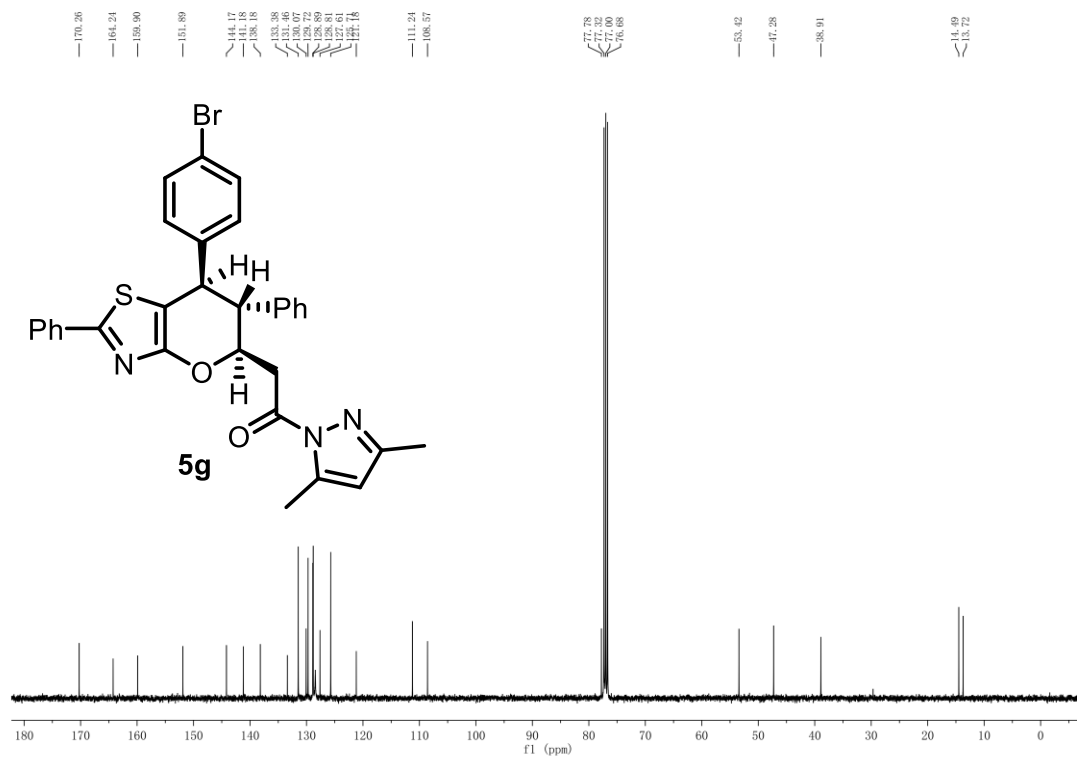



$^1\text{H}$ NMR of **5h** (400M,  $\text{CDCl}_3$ )

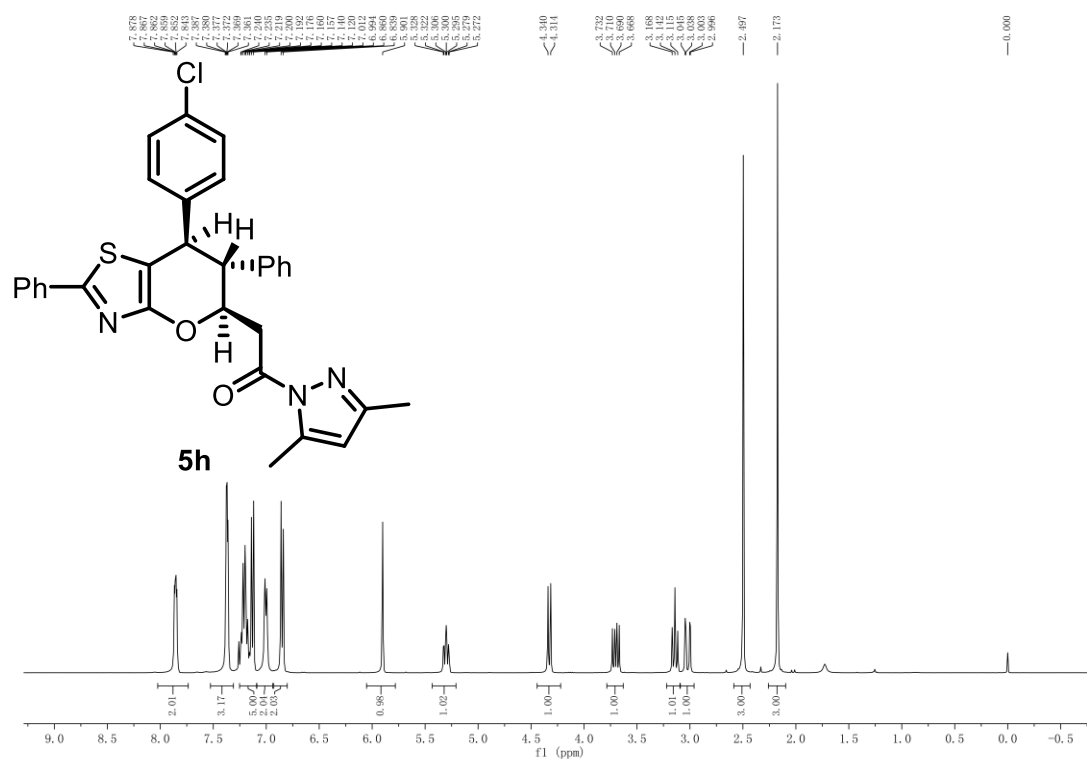

Crude  $^1\text{H}$ NMR of **5h** (400M,  $\text{CDCl}_3$ )

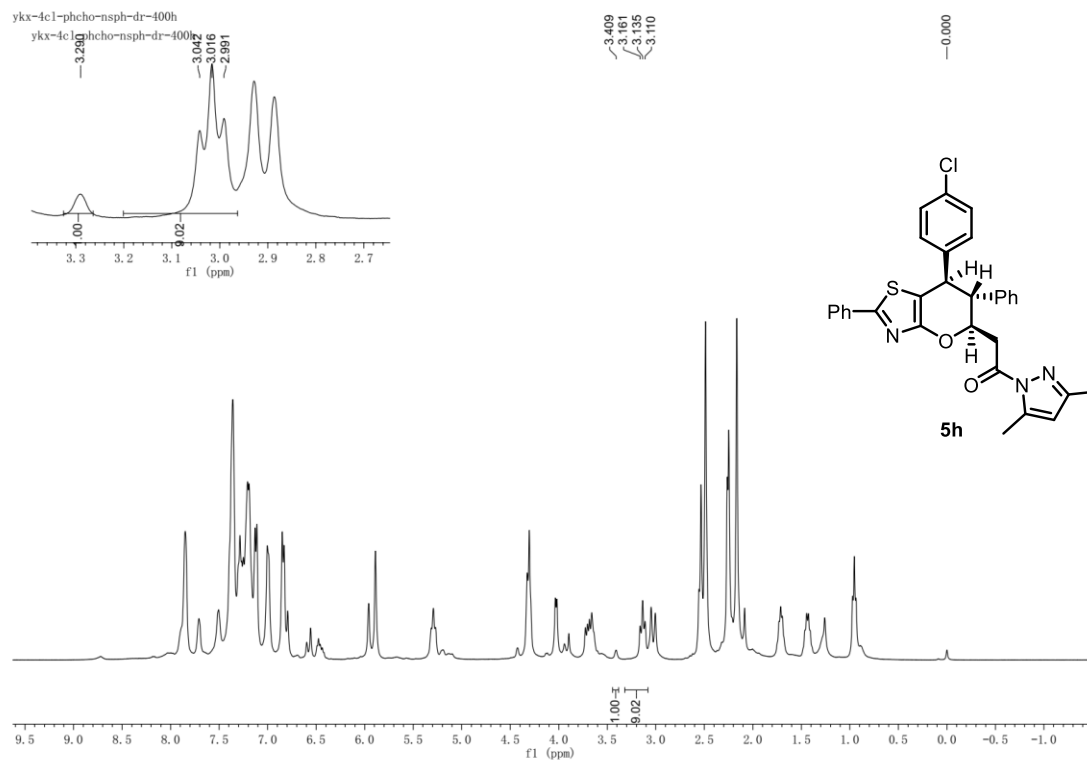

$^{13}\text{C}$ NMR of **5h** (101M,  $\text{CDCl}_3$ )

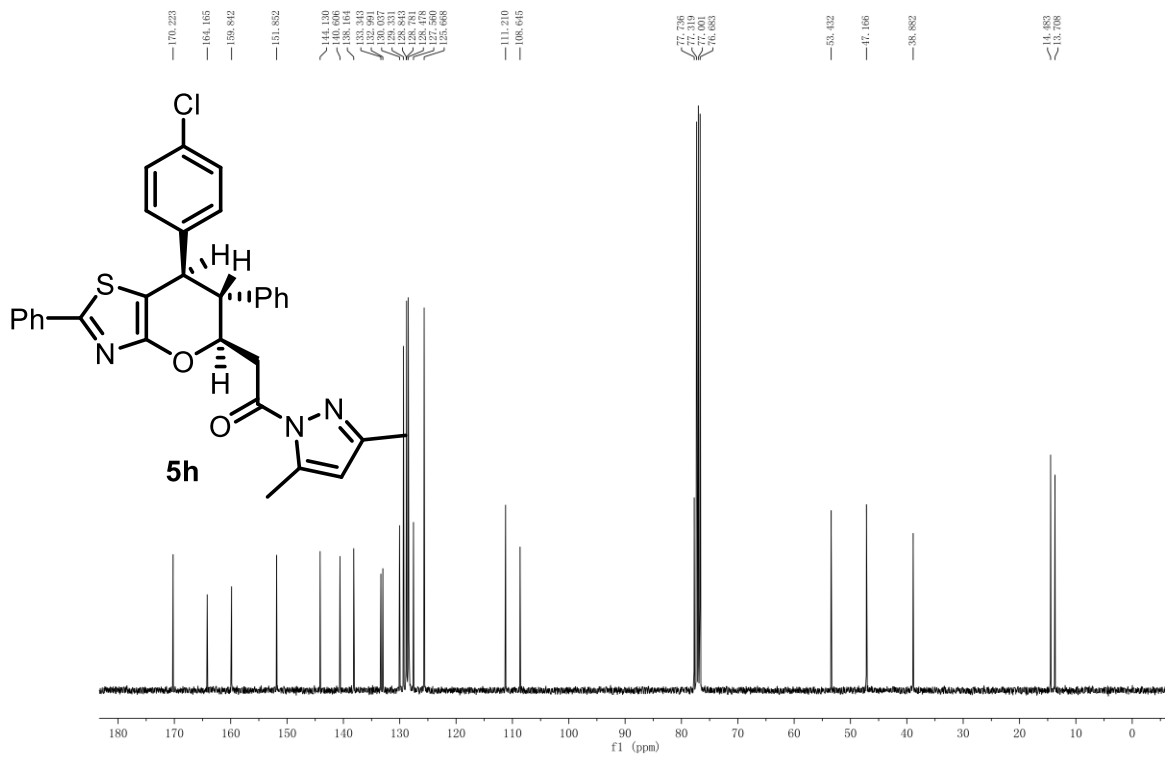



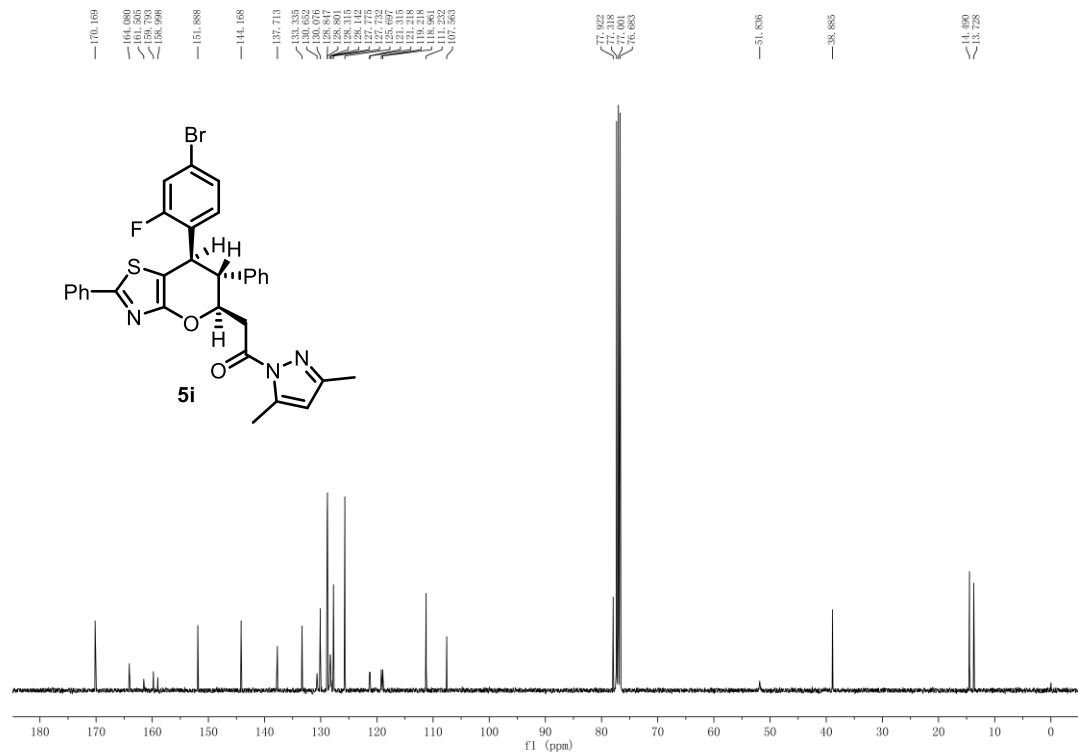

$^{19}\text{F}$  NMR of **5i** (101M,  $\text{CDCl}_3$ )

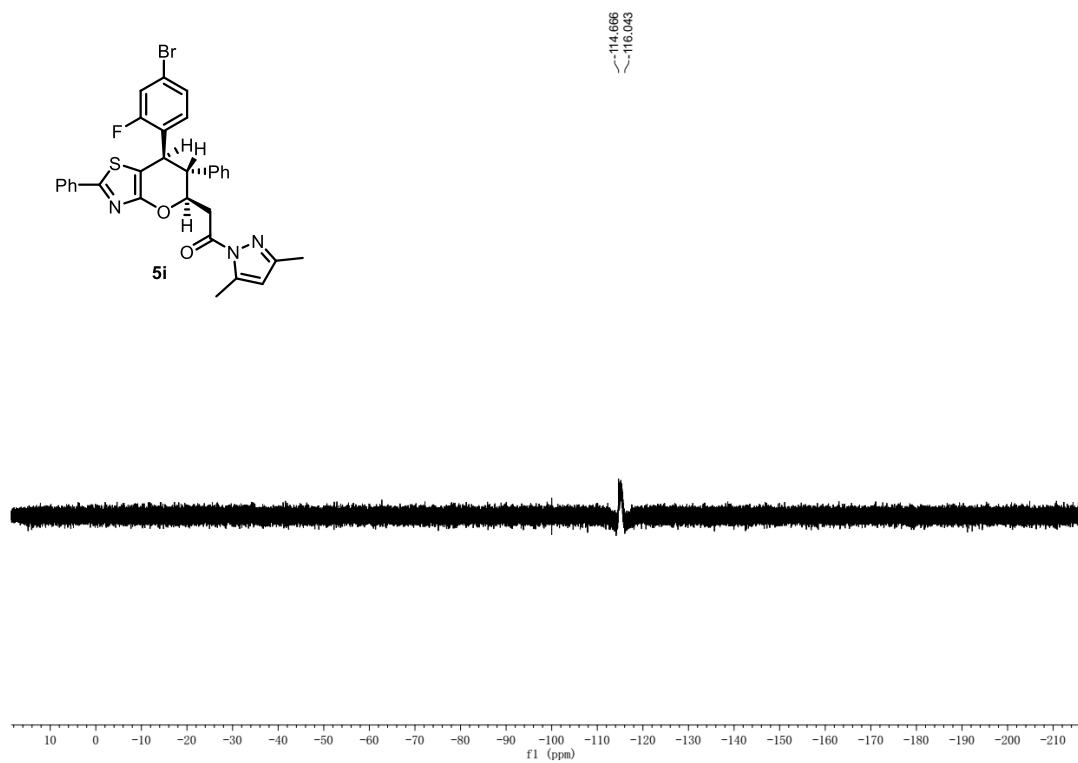



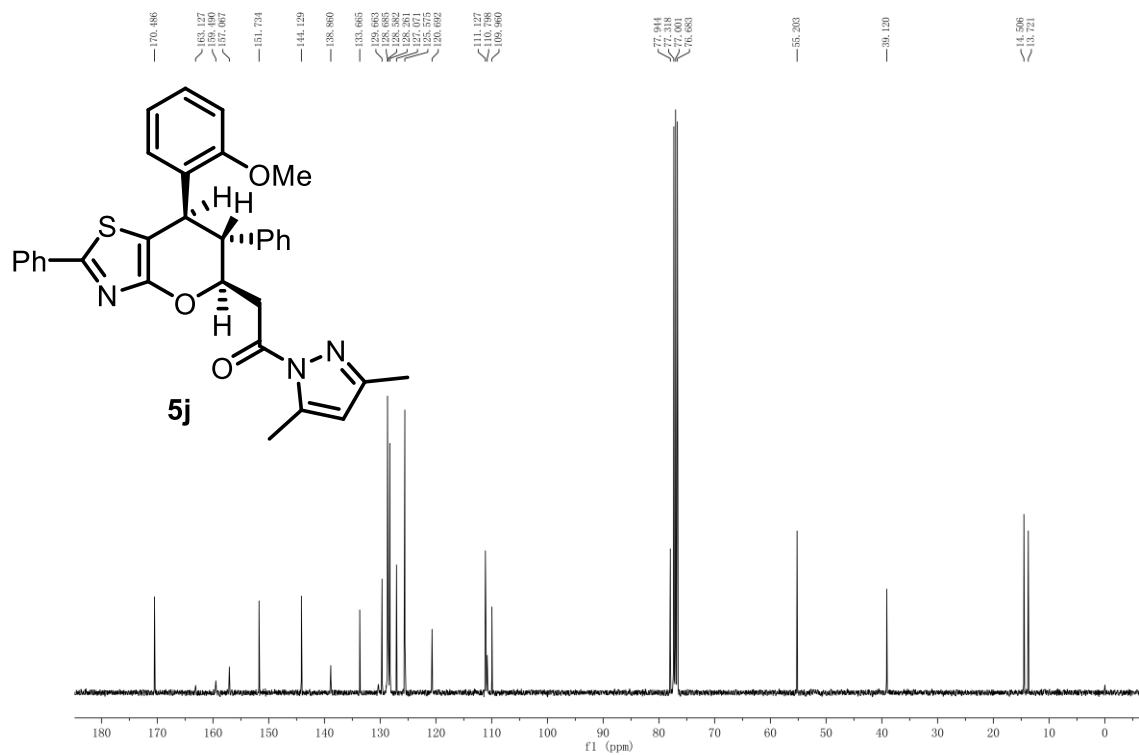







<sup>1</sup>H NMR of **7a-minor** (400M, CDCl<sub>3</sub>)

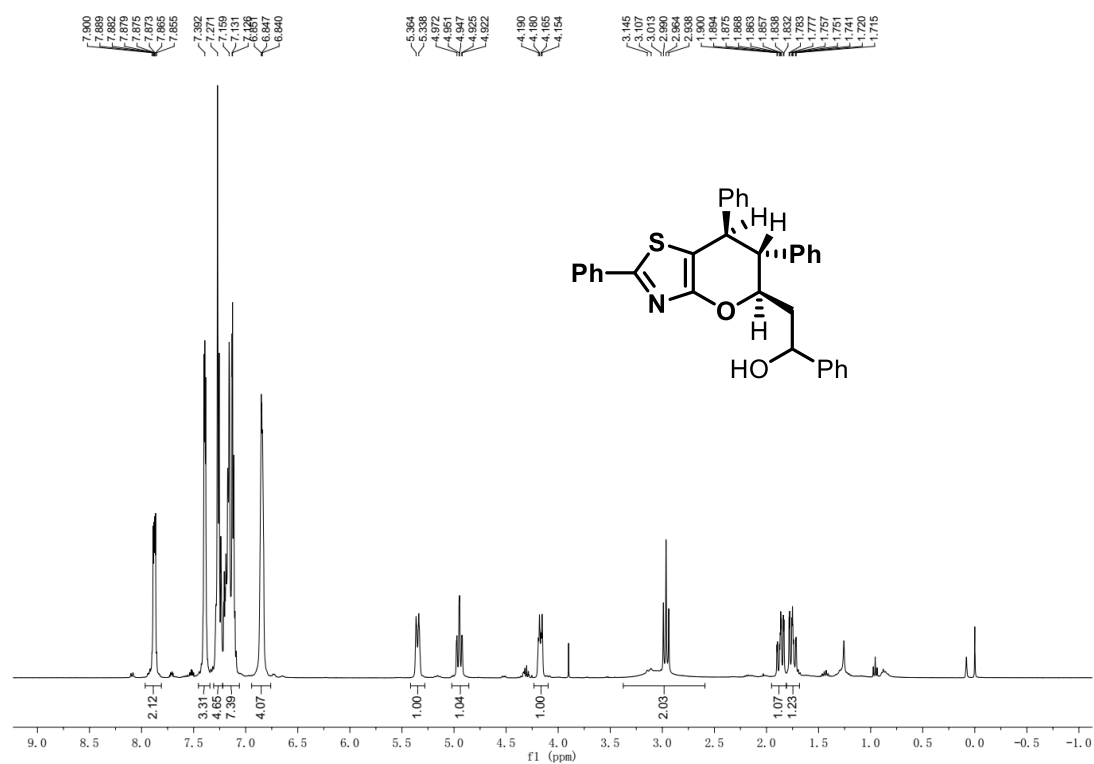

<sup>13</sup>C NMR of **7a-minor** (101M, CDCl<sub>3</sub>)

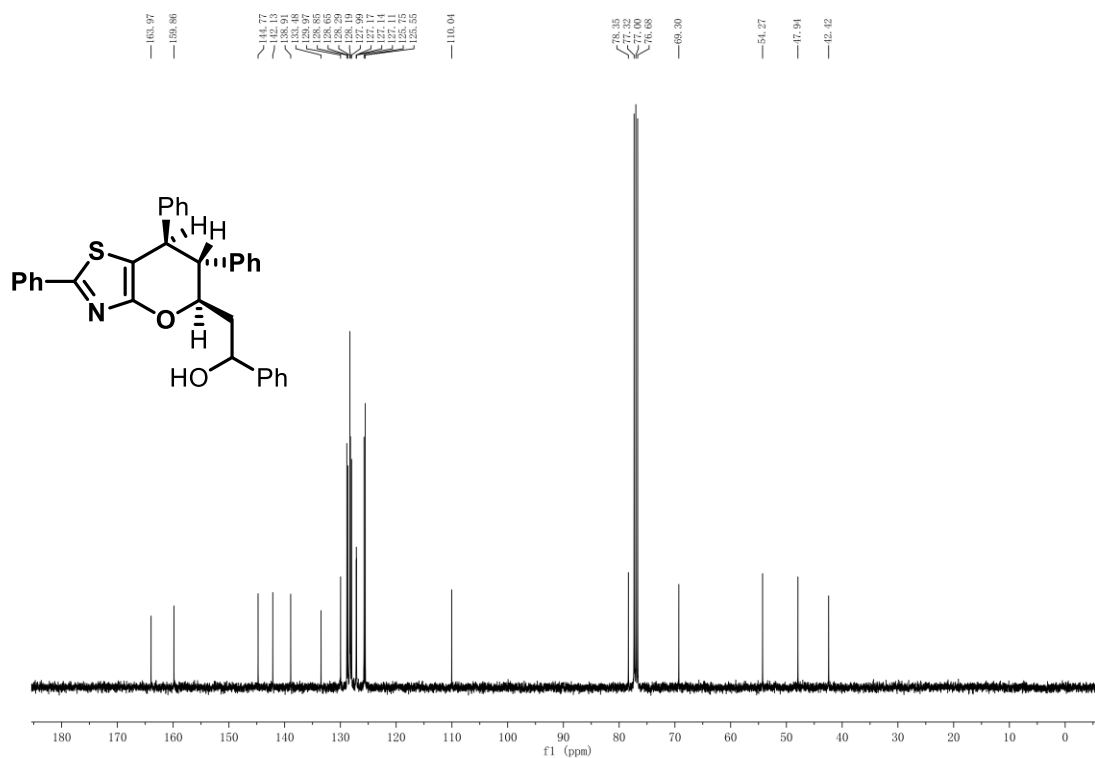

<sup>1</sup>H NMR of **7a-major** (400M, CDCl<sub>3</sub>)

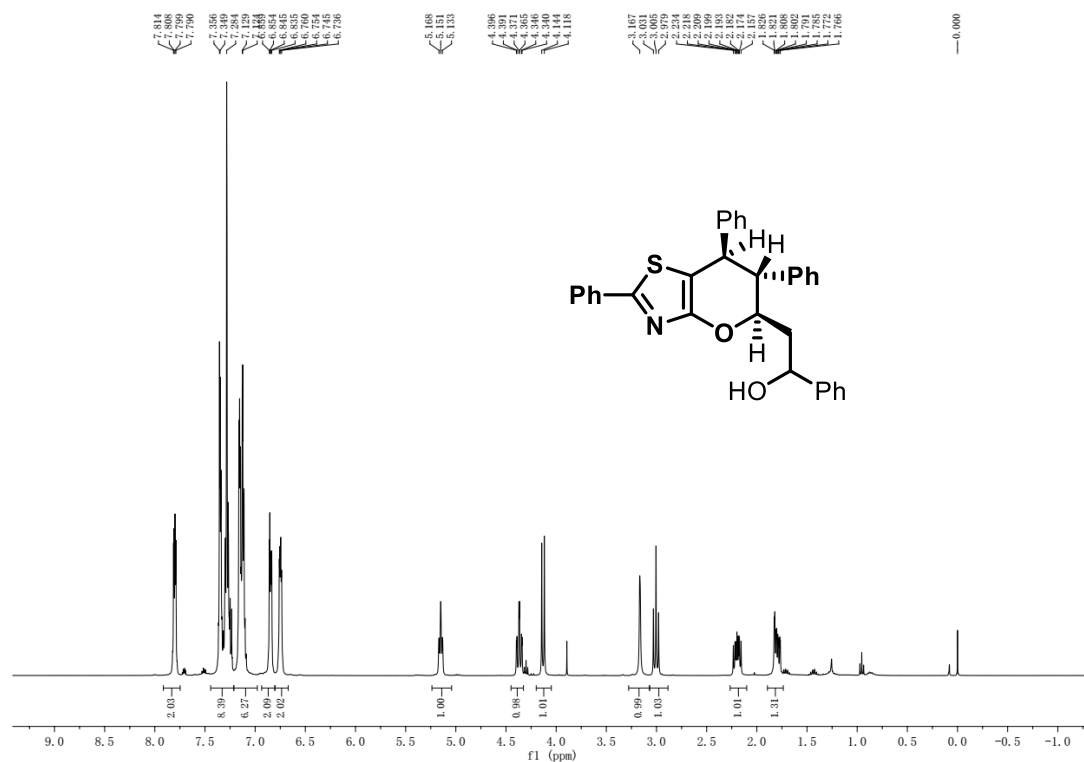

<sup>13</sup>C NMR of **7a-major** (101M, CDCl<sub>3</sub>)

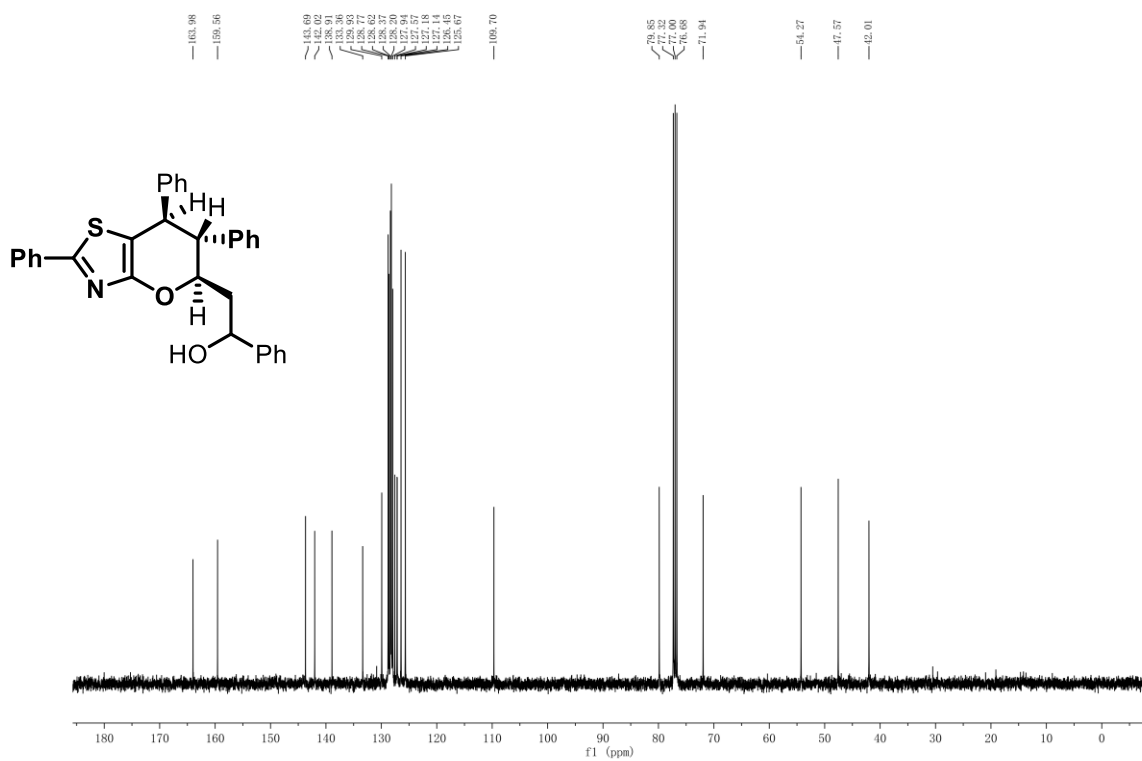

### D<sub>2</sub>O exchange experiment of 7a-minor

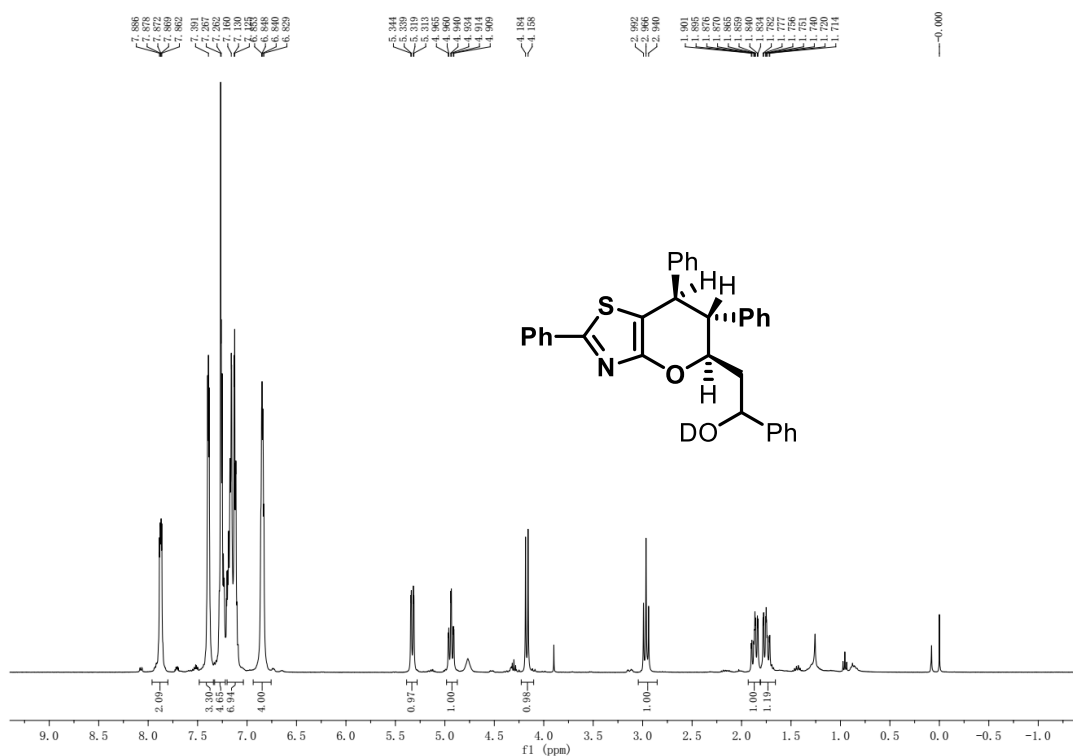

### D<sub>2</sub>O exchange experiment of 7a-major

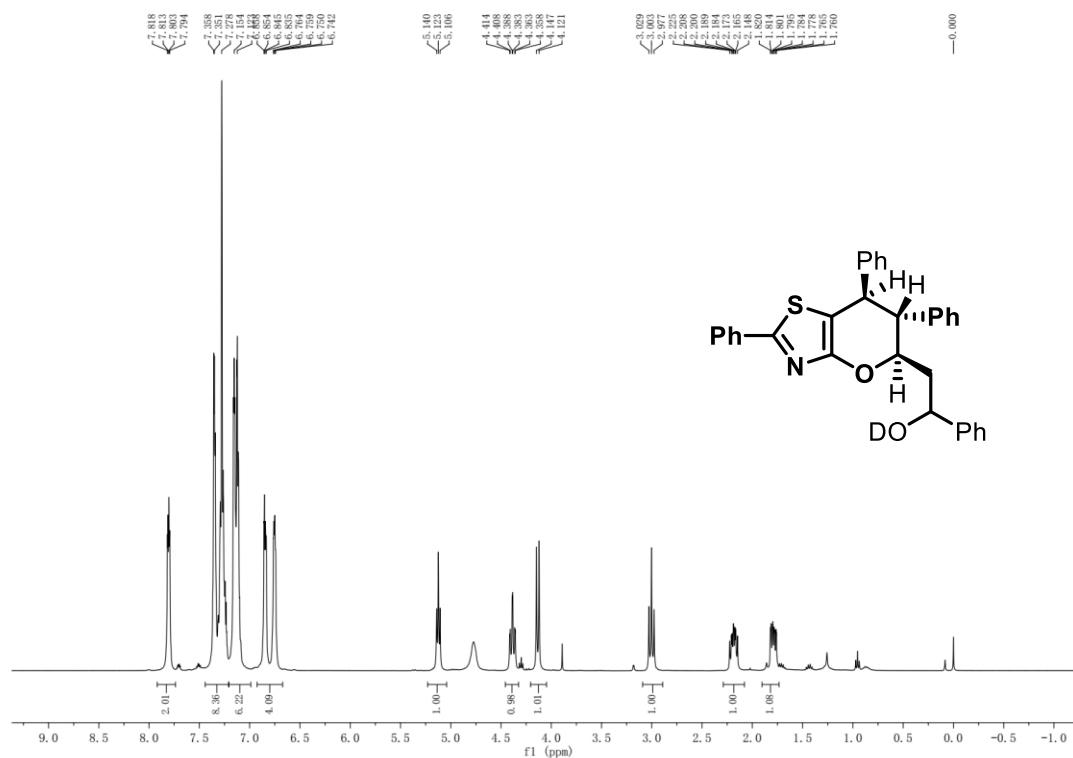

<sup>1</sup>H NMR of **3a-minor** (400M, CDCl<sub>3</sub>)

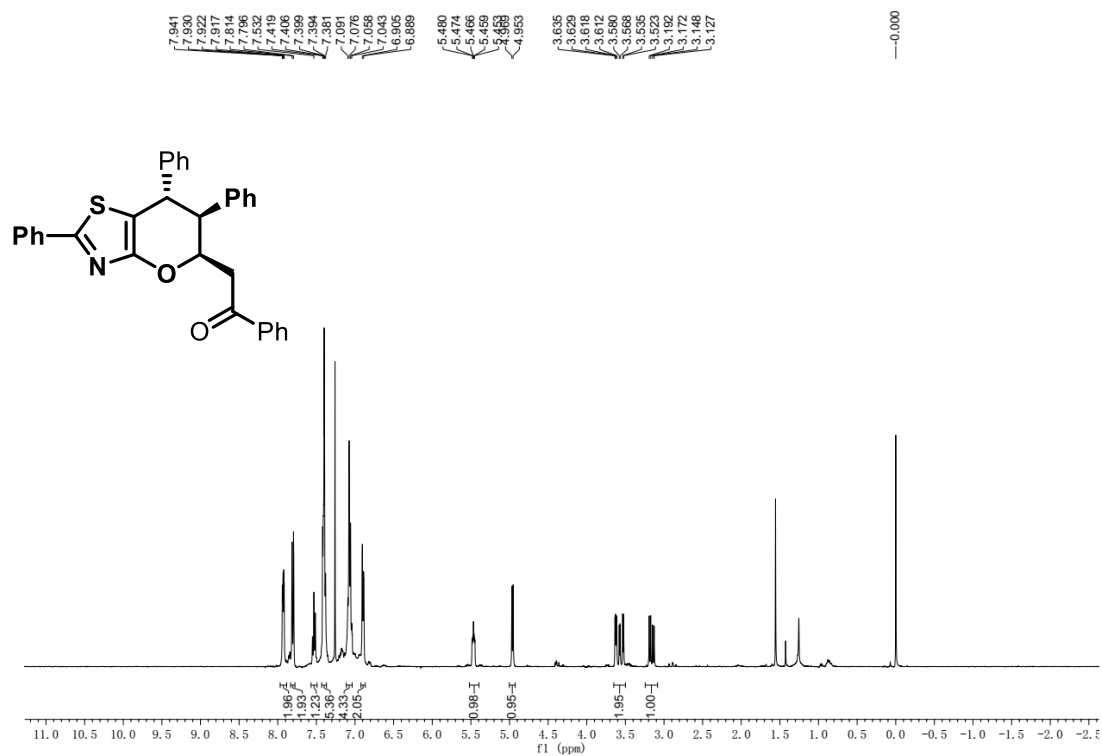

<sup>13</sup>C NMR of **3a-minor** (101M, CDCl<sub>3</sub>)

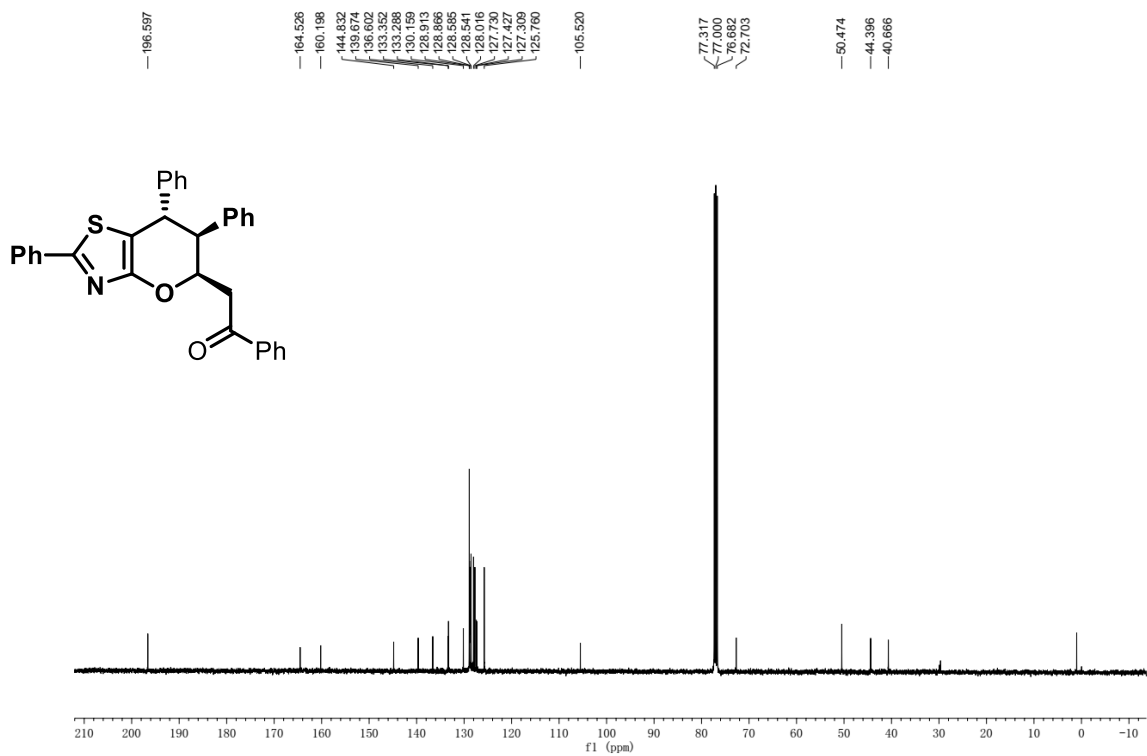

HPLC chromatogram of compound **3a** [Chiralpak IH column, hexane: *i*-PrOH= 93:7, 1.0 mL/min]

**Racemic HPLC chromatogram**

**Chiral HPLC chromatogram**

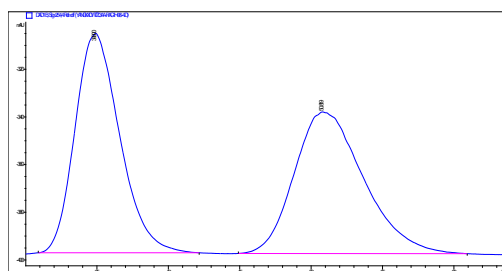

| #     | Time   | Area(%) |
|-------|--------|---------|
| 1     | 34.9   | 49.987  |
| 2     | 50.819 | 50.013  |
| Total |        | 100.000 |

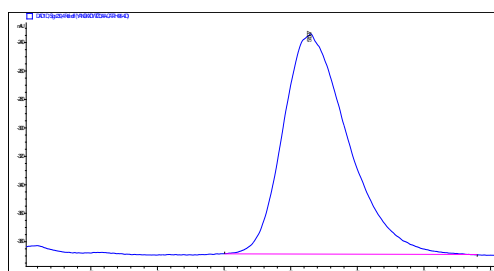

| #     | Time   | Area(%) |
|-------|--------|---------|
| 1     | 51.507 | 100.000 |
| Total |        | 100.000 |

HPLC chromatogram of compound **3b** [Chiralpak IF column, hexane: *i*-PrOH = 85:15, 1.0 mL/min ]

**Racemic HPLC chromatogram**

**Chiral HPLC chromatogram**

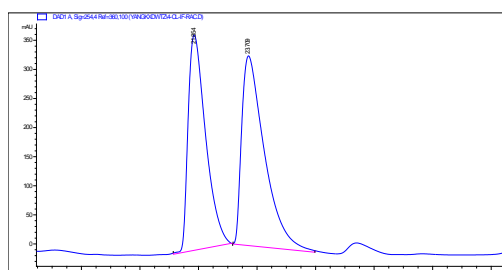

| #     | Time   | Area(%) |
|-------|--------|---------|
| 1     | 21.854 | 49.638  |
| 2     | 23.709 | 50.362  |
| Total |        | 100.000 |

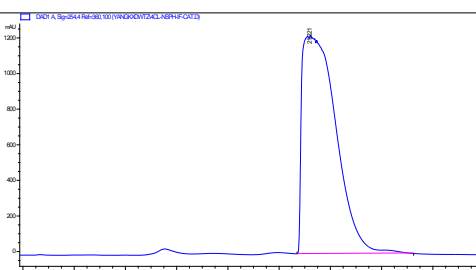

| #     | Time   | Area(%) |
|-------|--------|---------|
| 1     | 21.221 | 100.000 |
| Total |        | 100.000 |

HPLC chromatogram of compound **3c** [Chiralpak IH column, hexane: *i*-PrOH= 93:7, 1.0 mL/min]

**Racemic HPLC chromatogram**

**Chiral HPLC chromatogram**

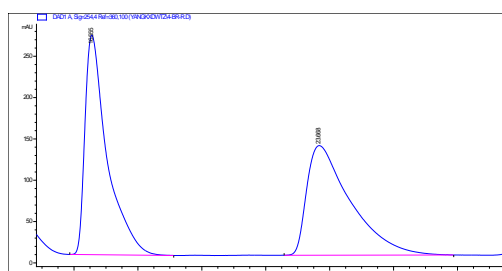

| #     | Time   | Area(%) |
|-------|--------|---------|
| 1     | 16.555 | 50.374  |
| 2     | 23.668 | 49.626  |
| Total |        | 100.000 |

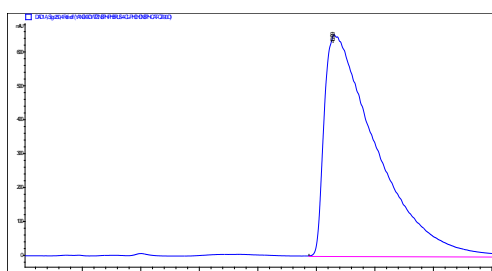

| #     | Time   | Area(%) |
|-------|--------|---------|
| 2     | 22.852 | 100.000 |
| Total |        | 100.000 |

HPLC chromatogram of compound **3d** [Chiralpak IC column, hexane: *i*-PrOH = 90:10, 1.0 mL/min]

**Racemic HPLC chromatogram**

**Chiral HPLC chromatogram**

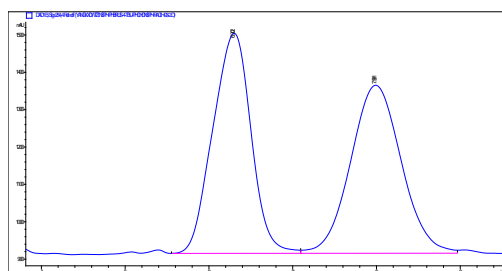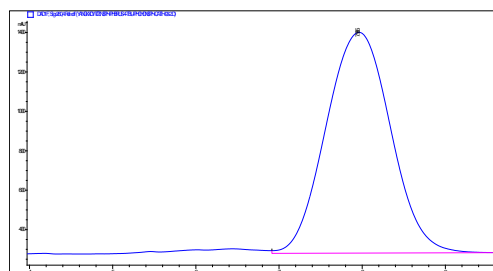

| #     | Time  | Area(%) |
|-------|-------|---------|
| 1     | 6.302 | 49.672  |
| 2     | 7.991 | 50.328  |
| Total |       | 100.000 |

| #     | Time  | Area(%) |
|-------|-------|---------|
| 1     | 7.965 | 100.000 |
| Total |       | 100.000 |

HPLC chromatogram of compound **3e** [Chiralpak IC column, hexane: *i*-PrOH = 90:10, 1.0 mL/min]

**Racemic HPLC chromatogram**

**Chiral HPLC chromatogram**

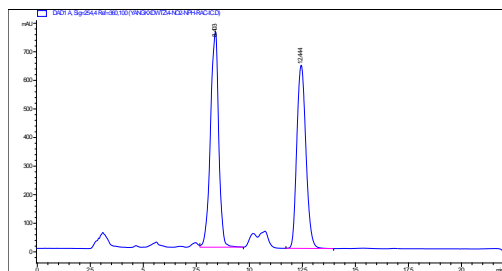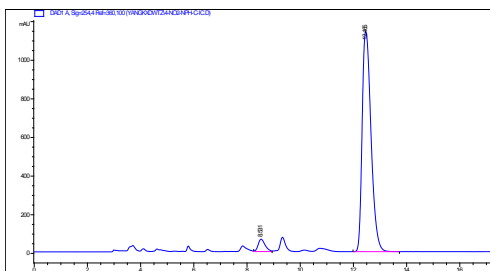

| #     | Time   | Area(%) |
|-------|--------|---------|
| 1     | 8.444  | 51.541  |
| 2     | 12.404 | 48.459  |
| Total |        | 100.000 |

| #     | Time   | Area(%) |
|-------|--------|---------|
| 1     | 8.531  | 4.225   |
| 2     | 12.465 | 95.775  |
| Total |        | 100.000 |

HPLC chromatogram of compound **3f** [Chiralpak IH column, hexane: *i*-PrOH = 90:10, 1.0 mL/min]

**Racemic HPLC chromatogram**

**Chiral HPLC chromatogram**

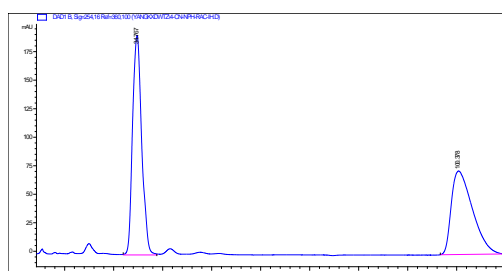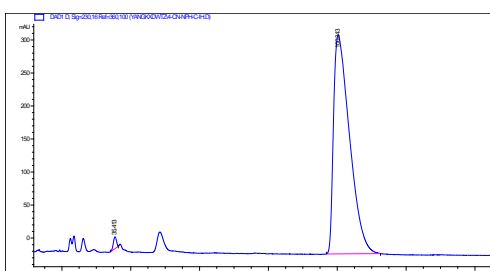

| #     | Time    | Area(%) |
|-------|---------|---------|
| 1     | 34.767  | 53.191  |
| 2     | 100.378 | 56.809  |
| Total |         | 100.000 |

| #     | Time    | Area(%) |
|-------|---------|---------|
| 1     | 35.414  | 1.028   |
| 2     | 100.343 | 98.972  |
| Total |         | 100.000 |

HPLC chromatogram of compound **3g** [Chiralpak OD column, hexane: *i*-PrOH = 80:20, 1.0 mL/min ]

**Racemic HPLC chromatogram**

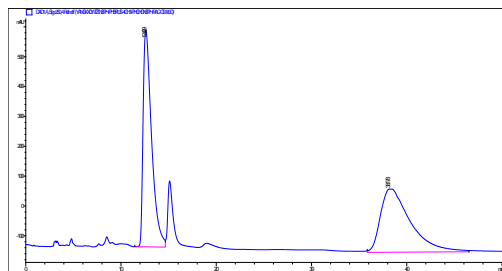

| #     | Time   | Area(%) |
|-------|--------|---------|
| 1     | 12.609 | 49.354  |
| 2     | 38.178 | 50.646  |
| Total |        | 100.000 |

**Chiral HPLC chromatogram**

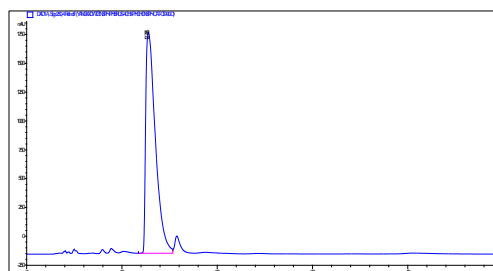

| #     | Time   | Area(%) |
|-------|--------|---------|
| 1     | 12.786 | 100.000 |
| Total |        | 100.000 |

HPLC chromatogram of compound **3h** [Chiralpak IF column, hexane: *i*-PrOH: DCM = 91:4:5, 1.0 mL/min ]

**Racemic HPLC chromatogram**

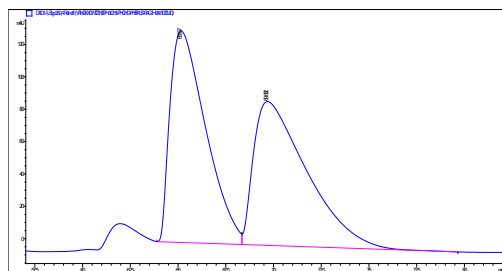

| #     | Time   | Area(%) |
|-------|--------|---------|
| 1     | 65.157 | 49.551  |
| 2     | 69.682 | 50.449  |
| Total |        | 100.000 |

**Chiral HPLC chromatogram**

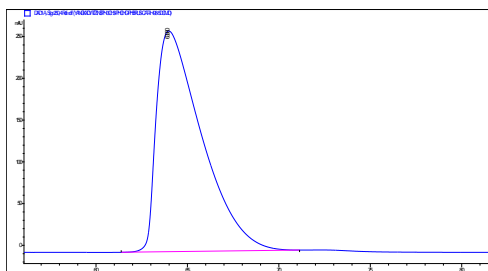

| #     | Time   | Area(%) |
|-------|--------|---------|
| 1     | 65.157 | 100.000 |
| Total |        | 100.000 |

HPLC chromatogram of compound **3i** [Chiralpak IH column, hexane: *i*-PrOH:DCM = 91:4:5, 1.0 mL/min ]

**Racemic HPLC chromatogram**

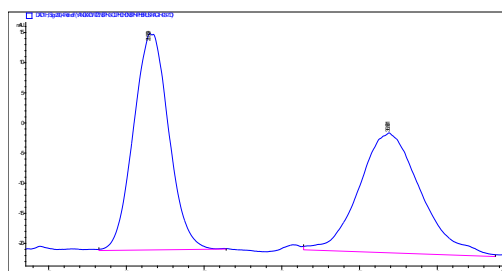

| #     | Time   | Area(%) |
|-------|--------|---------|
| 1     | 21.509 | 50.975  |
| 2     | 36.901 | 49.025  |
| Total |        | 100.000 |

**Chiral HPLC chromatogram**

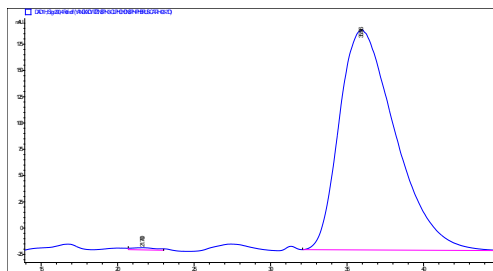

| #     | Time   | Area(%) |
|-------|--------|---------|
| 1     | 21.7   | 0.434   |
| 2     | 35.996 | 99.566  |
| Total |        | 100.000 |

HPLC chromatogram of compound **3j** [Chiralpak IH column, hexane: *i*-PrOH:DCM = 91:4:5, 1.0 mL/min ]

**Racemic HPLC chromatogram**

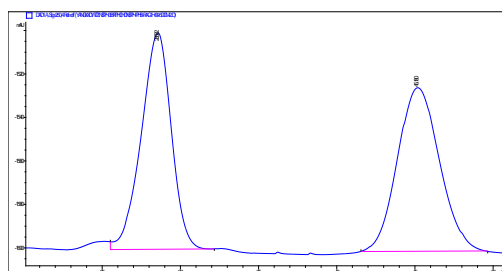

| #     | Time   | Area(%) |
|-------|--------|---------|
| 1     | 28.582 | 48.653  |
| 2     | 45.18  | 51.347  |
| Total |        | 100.000 |

**Chiral HPLC chromatogram**

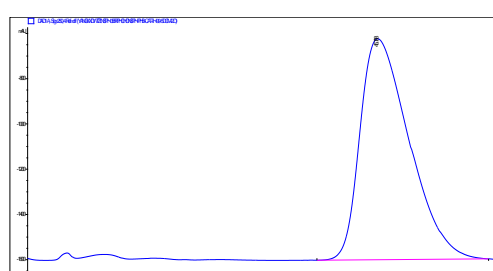

| #     | Time   | Area(%) |
|-------|--------|---------|
| 1     | 45.797 | 100.000 |
| Total |        | 100.000 |

HPLC chromatogram of compound **3k** [Chiralpak IH column, hexane: *i*-PrOH:DCM = 91:4:5, 1.0 mL/min ]

**Racemic HPLC chromatogram**

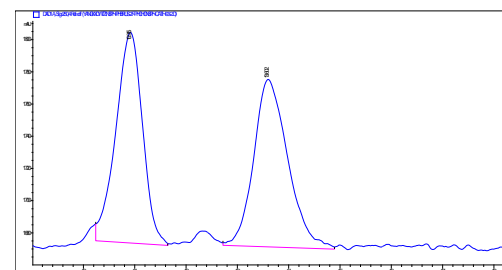

| #     | Time   | Area(%) |
|-------|--------|---------|
| 1     | 10.92  | 48.310  |
| 2     | 13.602 | 51.690  |
| Total |        | 100.000 |

**Chiral HPLC chromatogram**

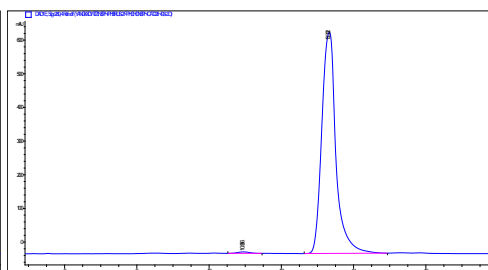

| #     | Time   | Area(%) |
|-------|--------|---------|
| 1     | 10.956 | 0.549   |
| 2     | 13.332 | 99.451  |
| Total |        | 100.000 |



HPLC chromatogram of compound **3l** [Chiralpak IH column, hexane: *i*-PrOH = 93:7, 1.0 mL/min ]

**Racemic HPLC chromatogram**

**Chiral HPLC chromatogram**

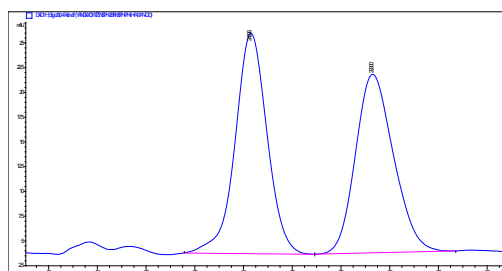

| #     | Time   | Area(%) |
|-------|--------|---------|
| 1     | 24.296 | 50.974  |
| 2     | 29.3   | 49.026  |
| Total |        | 100.000 |

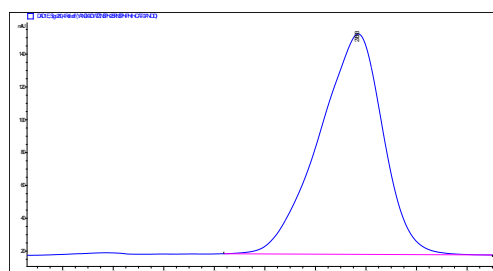

| #     | Time   | Area(%) |
|-------|--------|---------|
| 1     | 27.693 | 100.000 |
| Total |        | 100.000 |

HPLC chromatogram of compound **3m** [Chiralpak IH column, hexane: *i*-PrOH = 93:7, 1.0 mL/min ]

**Racemic HPLC chromatogram**

**Chiral HPLC chromatogram**

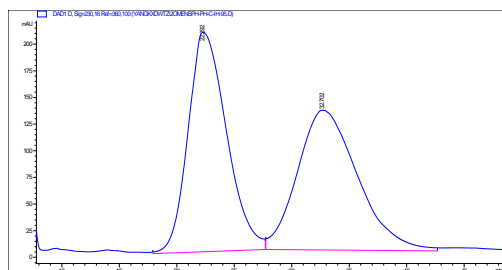

| #     | Time   | Area(%) |
|-------|--------|---------|
| 1     | 22.292 | 49.133  |
| 2     | 32.702 | 50.867  |
| Total |        | 100.000 |

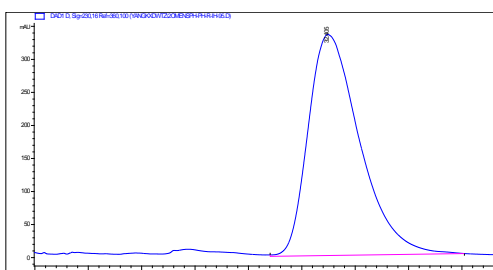

| #     | Time   | Area(%) |
|-------|--------|---------|
| 1     | 32.405 | 100.000 |
| Total |        | 100.000 |

HPLC chromatogram of compound **3n** [Chiralpak AD column, hexane: *i*-PrOH = 80:20, 1.0 mL/min ]

**Racemic HPLC chromatogram**

**Chiral HPLC chromatogram**

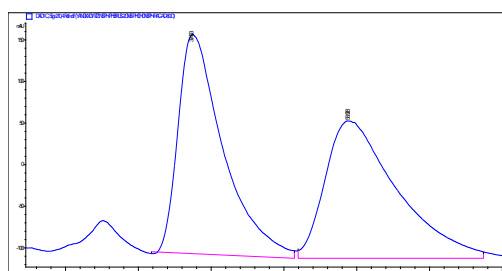

| #     | Time   | Area(%) |
|-------|--------|---------|
| 1     | 37.453 | 50.137  |
| 2     | 58.928 | 49.863  |
| Total |        | 100.000 |

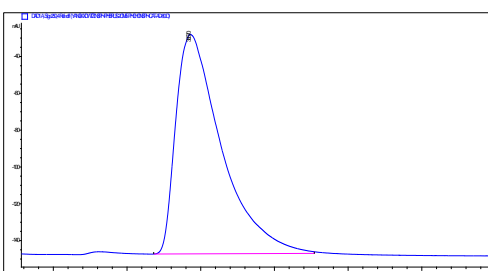

| #     | Time  | Area(%) |
|-------|-------|---------|
| 1     | 38.57 | 100.000 |
| Total |       | 100.000 |

HPLC chromatogram of compound **3o** [Chiralpak IH column, hexane: *i*-PrOH = 93:7, 1.0 mL/min ]

**Racemic HPLC chromatogram**

**Chiral HPLC chromatogram**

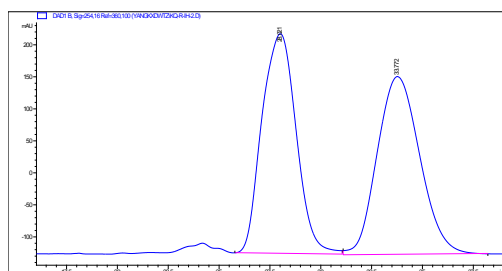

| #     | Time   | Area(%) |
|-------|--------|---------|
| 1     | 28.021 | 47.989  |
| 2     | 33.7   | 52.011  |
| Total |        | 100.000 |

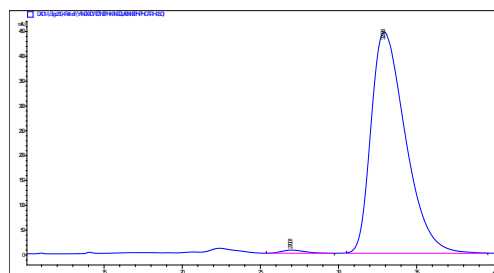

| #     | Time   | Area(%) |
|-------|--------|---------|
| 1     | 27.002 | 0.947   |
| 2     | 32.938 | 99.053  |
| Total |        | 100.000 |

HPLC chromatogram of compound **3p** [Chiralpak IF column, hexane: *i*-PrOH = 90:10, 1.0 mL/min ]

**Racemic HPLC chromatogram**

**Chiral HPLC chromatogram**

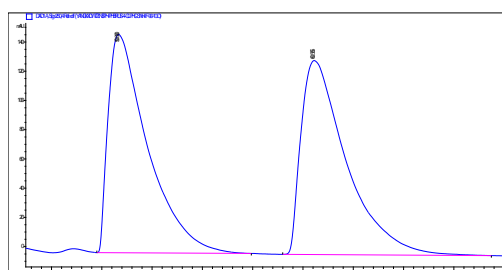

| #     | Time   | Area(%) |
|-------|--------|---------|
| 1     | 50.83  | 49.433  |
| 2     | 60.555 | 50.567  |
| Total |        | 100.000 |

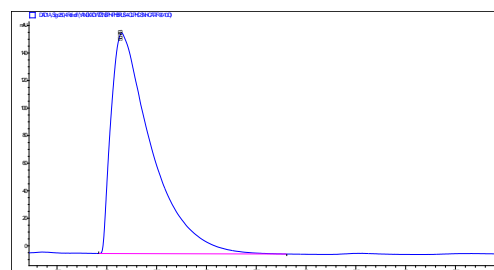

| #     | Time   | Area(%) |
|-------|--------|---------|
| 1     | 50.743 | 100.000 |
| Total |        | 100.000 |

HPLC chromatogram of compound **3q** [Chiralpak IH column, hexane: *i*-PrOH = 90:10, 1.0 mL/min ]

**Racemic HPLC chromatogram**

**Chiral HPLC chromatogram**

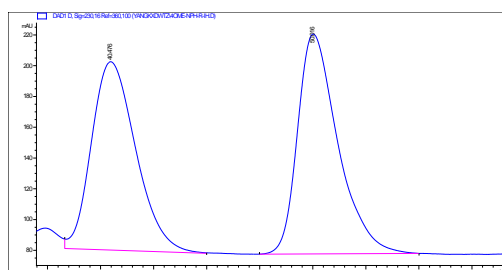

| #     | Time   | Area(%) |
|-------|--------|---------|
| 1     | 40.076 | 48.433  |
| 2     | 50.016 | 51.567  |
| Total |        | 100.000 |

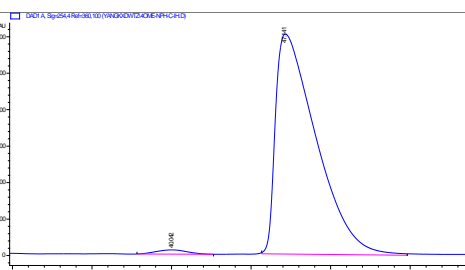

| #     | Time   | Area(%) |
|-------|--------|---------|
| 1     | 40.476 | 1.434   |
| 2     | 47.141 | 98.566  |
| Total |        | 100.000 |

HPLC chromatogram of compound **3r** [Chiralpak Ih column, hexane: *i*-PrOH = 90:10, 1.0 mL/min ]

**Racemic HPLC chromatogram**

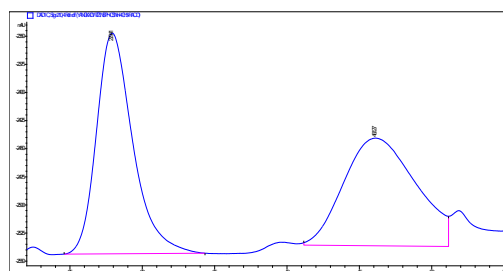

| #     | Time   | Area(%) |
|-------|--------|---------|
| 1     | 27.941 | 50.861  |
| 2     | 46.127 | 49.139  |
| Total |        | 100.000 |

**Chiral HPLC chromatogram**

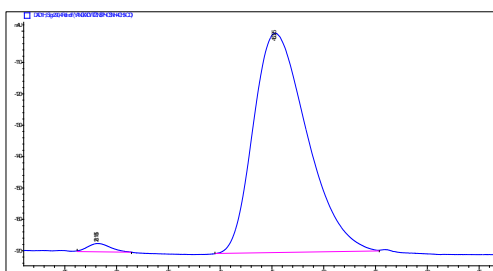

| #     | Time   | Area(%) |
|-------|--------|---------|
| 1     | 28.185 | 1.588   |
| 2     | 45.323 | 98.412  |
| Total |        | 100.000 |

HPLC chromatogram of compound **3s** [Chiralpak IF column, hexane: *i*-PrOH = 90:10, 1.0 mL/min ]

**Racemic HPLC chromatogram**

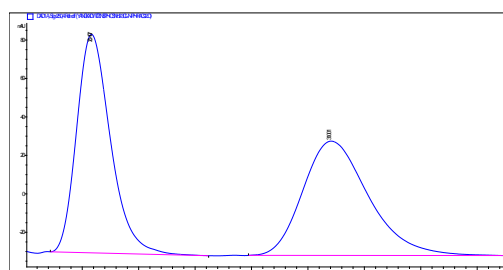

| #     | Time   | Area(%) |
|-------|--------|---------|
| 1     | 20.407 | 49.433  |
| 2     | 31.001 | 50.567  |
| Total |        | 100.000 |

**Chiral HPLC chromatogram**

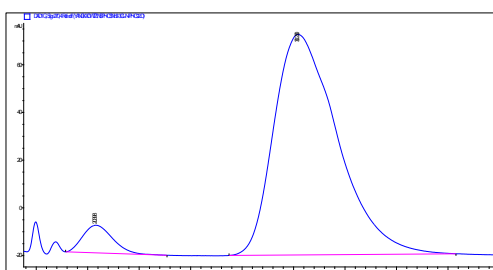

| #     | Time   | Area(%) |
|-------|--------|---------|
| 1     | 20.398 | 5.538   |
| 2     | 30.23  | 94.462  |
| Total |        | 100.000 |

HPLC chromatogram of compound **3t** [Chiralpak IH column, hexane: *i*-PrOH: DCM = 91:4:5, 1.0 mL/min ]

**Racemic HPLC chromatogram**

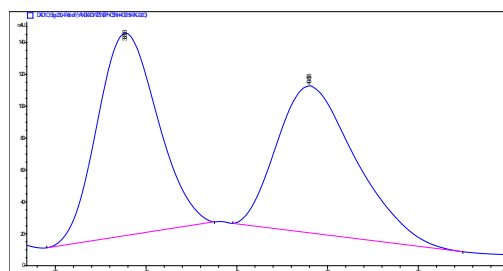

| #     | Time   | Area(%) |
|-------|--------|---------|
| 1     | 38.053 | 51.017  |
| 2     | 49.058 | 48.983  |
| Total |        | 100.000 |

**Chiral HPLC chromatogram**

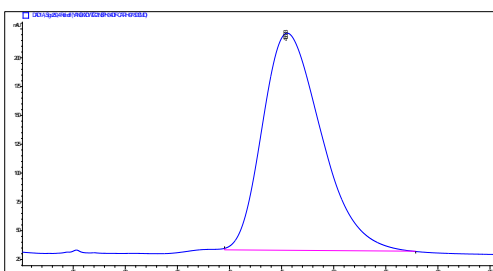

| #     | Time   | Area(%) |
|-------|--------|---------|
| 1     | 45.533 | 100.000 |
| Total |        | 100.000 |

HPLC chromatogram of compound **4a** [Chiralpak IF column, hexane: *i*-PrOH = 83:17, 1.0 mL/min]

**Racemic HPLC chromatogram**

**Chiral HPLC chromatogram**

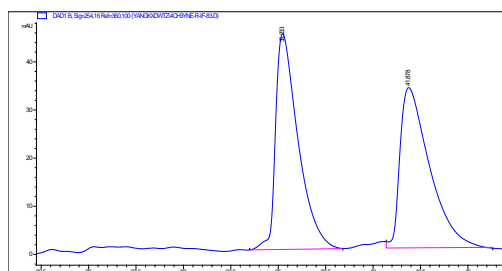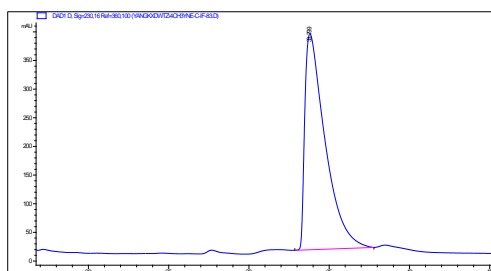

| #     | Time   | Area(%) |
|-------|--------|---------|
| 1     | 35.233 | 50.660  |
| 2     | 41.878 | 49.340  |
| Total |        | 100.000 |

| #     | Time   | Area(%) |
|-------|--------|---------|
| 1     | 33.799 | 100.000 |
| Total |        | 100.000 |

HPLC chromatogram of compound **4b** [Chiralpak IH column, hexane: *i*-PrOH = 90:10, 1.0 mL/min]

**Racemic HPLC chromatogram**

**Chiral HPLC chromatogram**

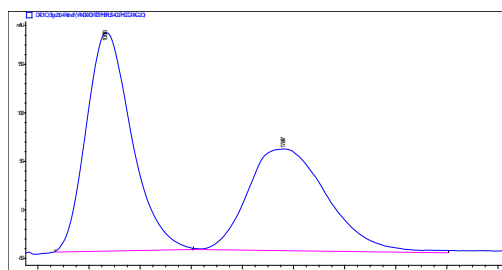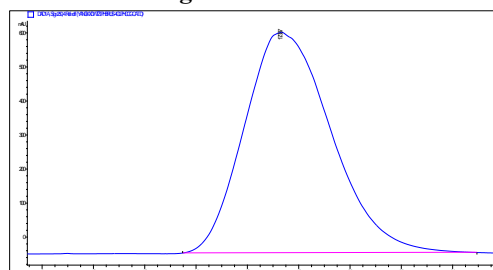

| #     | Time   | Area(%) |
|-------|--------|---------|
| 1     | 10.676 | 55.087  |
| 2     | 17.647 | 44.913  |
| Total |        | 100.000 |

| #     | Time   | Area(%) |
|-------|--------|---------|
| 1     | 17.337 | 100.000 |
| Total |        | 100.000 |

HPLC chromatogram of compound **4c** [Chiralpak IF column, hexane: *i*-PrOH = 83:17, 1.0 mL/min]

**Racemic HPLC chromatogram**

**Chiral HPLC chromatogram**

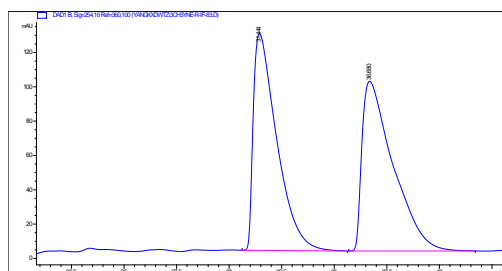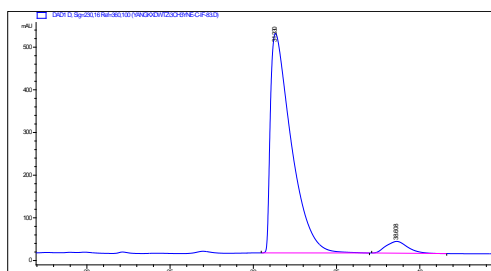

| #     | Time   | Area(%) |
|-------|--------|---------|
| 1     | 31.444 | 49.607  |
| 2     | 36.68  | 50.393  |
| Total |        | 100.000 |

| #     | Time   | Area(%) |
|-------|--------|---------|
| 1     | 31.33  | 96.799  |
| 2     | 38.608 | 3.201   |
| Total |        | 100.000 |

HPLC chromatogram of compound **4d** [Chiralpak AD column, hexane: *i*-PrOH = 80:20, 1.0 mL/min ]

**Racemic HPLC chromatogram**

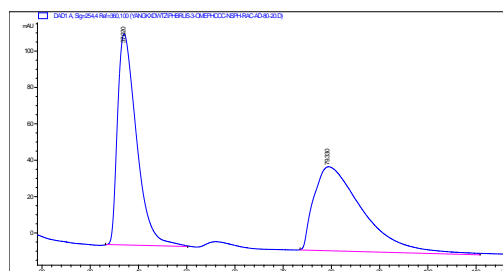

| #     | Time  | Area(%) |
|-------|-------|---------|
| 1     | 37.02 | 49.430  |
| 2     | 79.33 | 50.570  |
| Total |       | 100.000 |

**Chiral HPLC chromatogram**

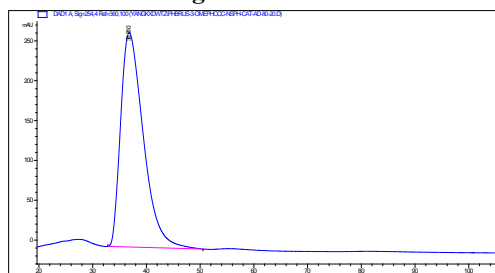

| #     | Time  | Area(%) |
|-------|-------|---------|
| 1     | 36.81 | 100.000 |
| Total |       | 100.000 |

HPLC chromatogram of compound **4e** [Chiralpak IH column, hexane: *i*-PrOH: DCM = 91:4:5, 1.0 mL/min ]

**Racemic HPLC chromatogram**

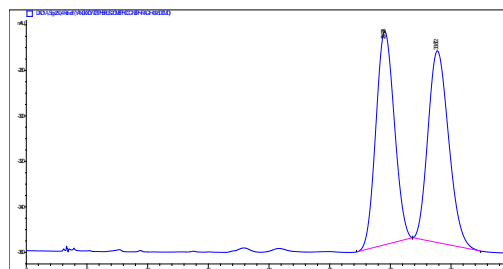

| #     | Time   | Area(%) |
|-------|--------|---------|
| 1     | 29.538 | 49.840  |
| 2     | 33.872 | 50.160  |
| Total |        | 100.000 |

**Chiral HPLC chromatogram**

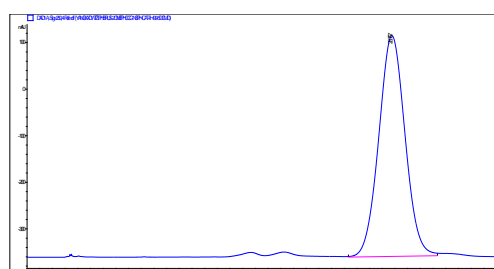

| #     | Time   | Area(%) |
|-------|--------|---------|
| 1     | 28.757 | 100.000 |
| Total |        | 100.000 |

HPLC chromatogram of compound **4f** [Chiralpak IH column, hexane: *i*-PrOH: DCM = 91:4:5, 1.0 mL/min ]

**Racemic HPLC chromatogram**

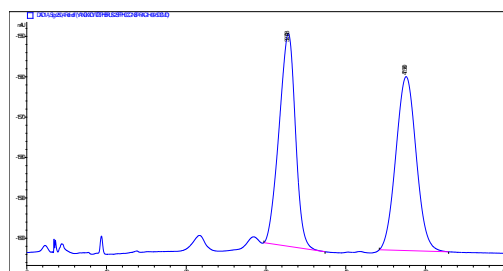

| #     | Time   | Area(%) |
|-------|--------|---------|
| 1     | 32.798 | 49.637  |
| 2     | 47.58  | 50.363  |
| Total |        | 100.000 |

**Chiral HPLC chromatogram**

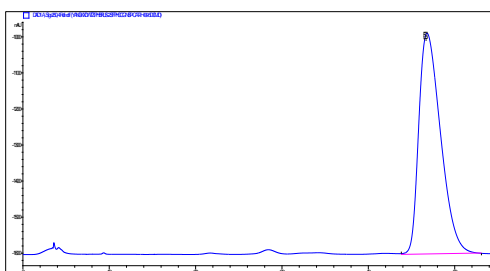

| #     | Time   | Area(%) |
|-------|--------|---------|
| 1     | 46.791 | 100.000 |
| Total |        | 100.000 |

HPLC chromatogram of compound **4g** [Chiralpak IF column, hexane: *i*-PrOH = 80:20, 1.0 mL/min ]

**Racemic HPLC chromatogram**

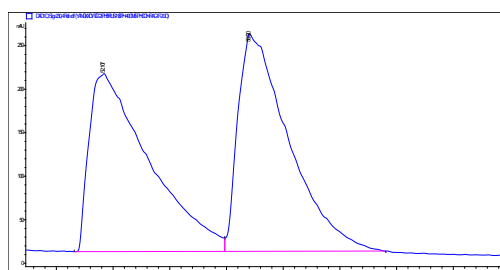

| #     | Time   | Area(%) |
|-------|--------|---------|
| 1     | 52.107 | 48.379  |
| 2     | 58.52  | 51.621  |
| Total |        | 100.000 |

**Chiral HPLC chromatogram**

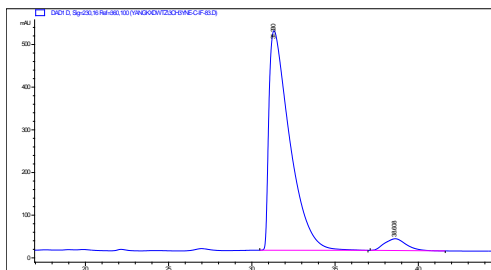

| #     | Time   | Area(%) |
|-------|--------|---------|
| 1     | 49.399 | 99.415  |
| 2     | 61.146 | 0.585   |
| Total |        | 100.000 |

HPLC chromatogram of compound **4h** [Chiralpak IH column, hexane: *i*-PrOH :DCM = 94:1:5, 1.0 mL/min ]

**Racemic HPLC chromatogram**

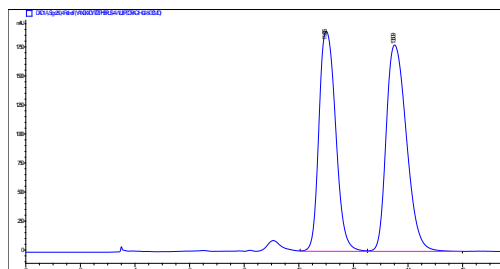

| #     | Time   | Area(%) |
|-------|--------|---------|
| 1     | 11.005 | 46.851  |
| 2     | 13.509 | 53.149  |
| Total |        | 100.000 |

**Chiral HPLC chromatogram**

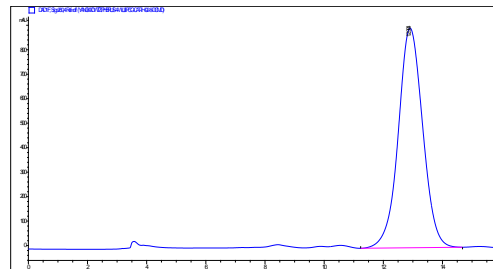

| #     | Time   | Area(%) |
|-------|--------|---------|
| 1     | 12.904 | 100.000 |
| Total |        | 100.000 |

HPLC chromatogram of compound **4i** [Chiralpak IC column, hexane: *i*-PrOH = 80:20, 1.0 mL/min ]

**Racemic HPLC chromatogram**

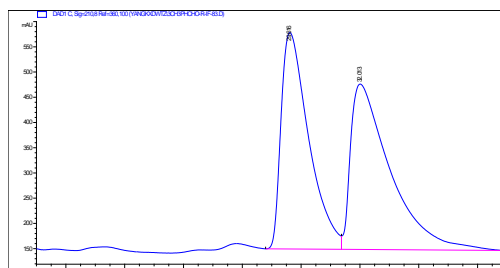

| #     | Time   | Area(%) |
|-------|--------|---------|
| 1     | 29.616 | 48.590  |
| 2     | 32.013 | 51.410  |
| Total |        | 100.000 |

**Chiral HPLC chromatogram**

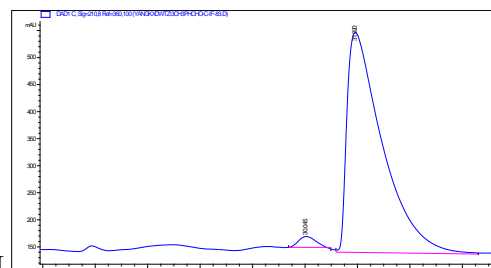

| #     | Time   | Area(%) |
|-------|--------|---------|
| 1     | 30.045 | 1.307   |
| 2     | 31.92  | 98.693  |
| Total |        | 100.000 |

HPLC chromatogram of compound **4j** [Chiralpak IH column, hexane: *i*-PrOH = 95:5, 1.0 mL/min ]

**Racemic HPLC chromatogram**

**Chiral HPLC chromatogram**

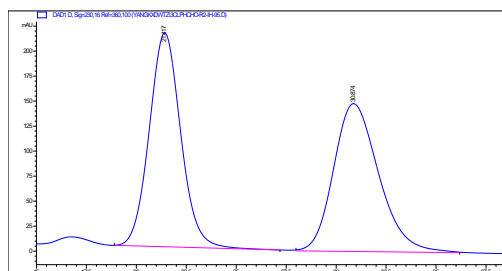

| #     | Time   | Area(%) |
|-------|--------|---------|
| 1     | 21.417 | 50.248  |
| 2     | 30.874 | 49.752  |
| Total |        | 100.000 |

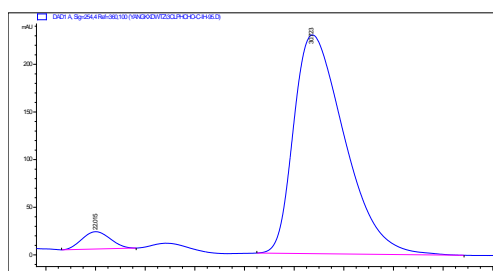

| #     | Time   | Area(%) |
|-------|--------|---------|
| 1     | 22.015 | 3.206   |
| 2     | 30.723 | 96.794  |
| Total |        | 100.000 |

HPLC chromatogram of compound **4k** [Chiralpak IH column, hexane: *i*-PrOH :DCM = 94:1:5, 1.0 mL/min ]

**Racemic HPLC chromatogram**

**Chiral HPLC chromatogram**

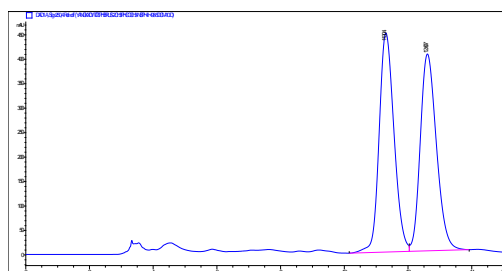

| #     | Time   | Area(%) |
|-------|--------|---------|
| 1     | 11.304 | 46.851  |
| 2     | 12.607 | 53.149  |
| Total |        | 100.000 |

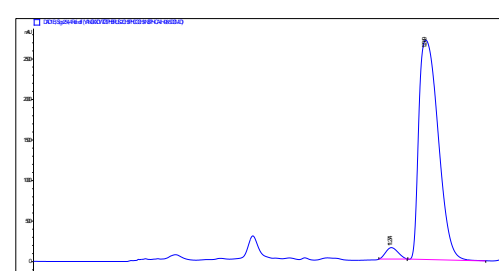

| #     | Time   | Area(%) |
|-------|--------|---------|
| 1     | 11.274 | 3.216   |
| 2     | 12.349 | 96.784  |
| Total |        | 100.000 |

HPLC chromatogram of compound **4l** [Chiralpak IC column, hexane: *i*-PrOH = 80:20, 1.0 mL/min ]

**Racemic HPLC chromatogram**

**Chiral HPLC chromatogram**

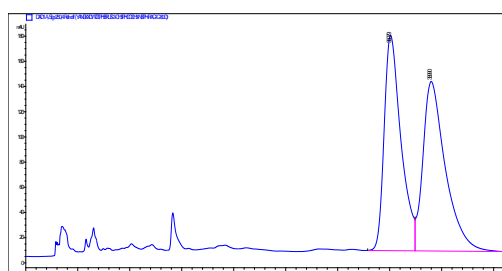

| #     | Time   | Area(%) |
|-------|--------|---------|
| 1     | 35.079 | 48.684  |
| 2     | 38.99  | 51.316  |
| Total |        | 100.000 |

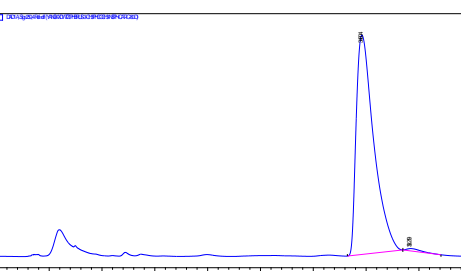

| #     | Time   | Area(%) |
|-------|--------|---------|
| 1     | 34.604 | 99.136  |
| 2     | 39.219 | 0.864   |
| Total |        | 100.000 |

HPLC chromatogram of compound **5a** [Chiralpak IC column, hexane: *i*-PrOH = 97:3, 1.0 mL/min ]

**Racemic HPLC chromatogram**

**Chiral HPLC chromatogram**

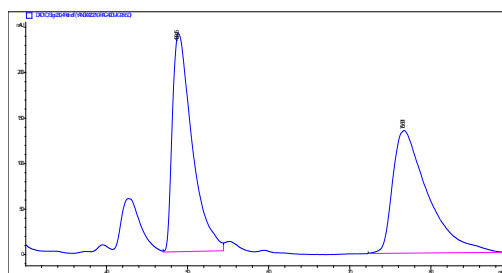

| #     | Time   | Area(%) |
|-------|--------|---------|
| 1     | 48.845 | 50.064  |
| 2     | 76.691 | 49.936  |
| Total |        | 100.000 |

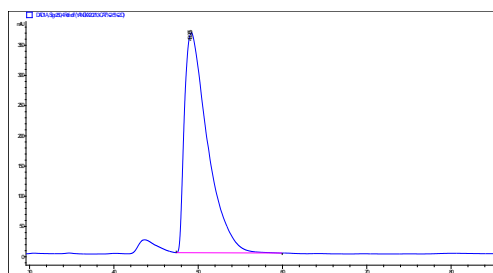

| #     | Time   | Area(%) |
|-------|--------|---------|
| 1     | 49.205 | 100.000 |
| Total |        | 100.000 |

HPLC chromatogram of compound **5b** [Chiralpak IC column, hexane: *i*-PrOH = 90:10, 1.0 mL/min ]

**Racemic HPLC chromatogram**

**Chiral HPLC chromatogram**

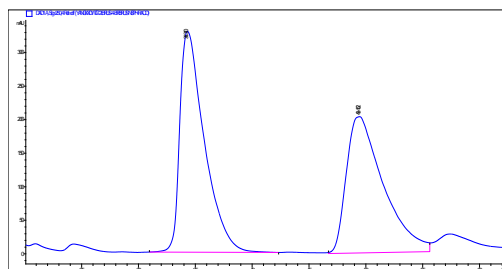

| #     | Time   | Area(%) |
|-------|--------|---------|
| 1     | 34.31  | 51.821  |
| 2     | 49.452 | 48.179  |
| Total |        | 100.000 |

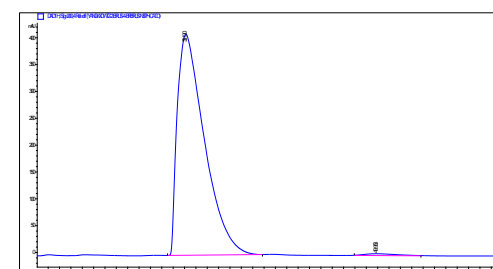

| #     | Time   | Area(%) |
|-------|--------|---------|
| 1     | 33.13  | 99.014  |
| 2     | 49.953 | 0.986   |
| Total |        | 100.000 |

HPLC chromatogram of compound **5c** [Chiralpak IC column, hexane: *i*-PrOH = 90:10, 1.0 mL/min ]

**Racemic HPLC chromatogram**

**Chiral HPLC chromatogram**

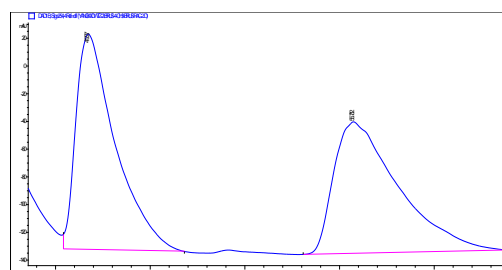

| #     | Time   | Area(%) |
|-------|--------|---------|
| 1     | 41.724 | 50.805  |
| 2     | 55.73  | 49.195  |
| Total |        | 100.000 |

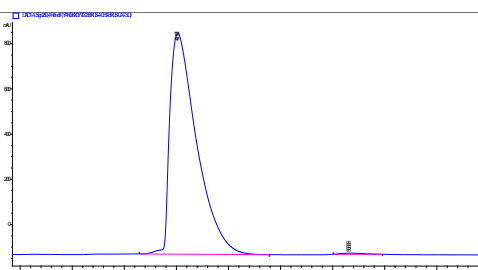

| #     | Time   | Area(%) |
|-------|--------|---------|
| 1     | 40.181 | 99.549  |
| 2     | 56.688 | 0.451   |
| Total |        | 100.000 |



HPLC chromatogram of compound **5d** [Chiralpak IC column, hexane: *i*-PrOH = 90:10, 1.0 mL/min]

**Racemic HPLC chromatogram**

**Chiral HPLC chromatogram**

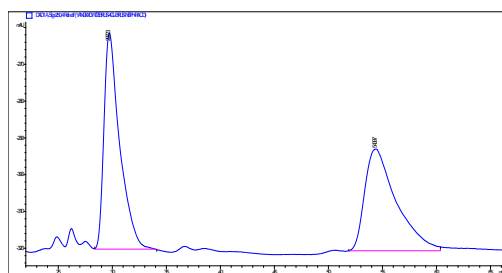

| #     | Time   | Area(%) |
|-------|--------|---------|
| 1     | 29.723 | 51.453  |
| 2     | 54.397 | 48.547  |
| Total |        | 100.000 |

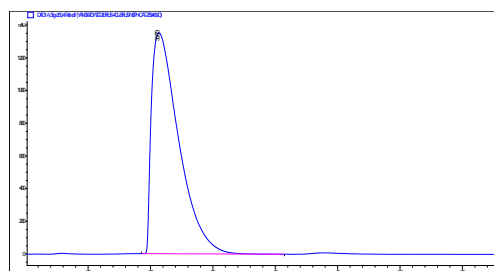

| #     | Time   | Area(%) |
|-------|--------|---------|
| 1     | 30.673 | 100.000 |
| Total |        | 100.000 |

HPLC chromatogram of compound **5e** [Chiralpak IC column, hexane: *i*-PrOH = 93:7, 1.0 mL/min]

**Racemic HPLC chromatogram**

**Chiral HPLC chromatogram**

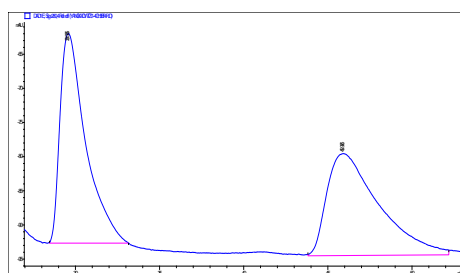

| #     | Time   | Area(%) |
|-------|--------|---------|
| 1     | 29.585 | 50.367  |
| 2     | 45.926 | 49.633  |
| Total |        | 100.000 |

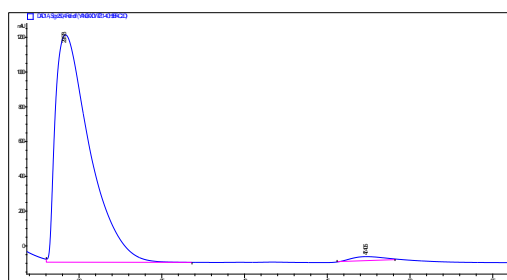

| #     | Time   | Area(%) |
|-------|--------|---------|
| 1     | 29.178 | 98.46   |
| 2     | 47.10  | 1.540   |
| Total |        | 100.000 |

HPLC chromatogram of compound **5f** [Chiralpak IC column, hexane: *i*-PrOH = 90:10, 1.0 mL/min]

**Racemic HPLC chromatogram**

**Chiral HPLC chromatogram**

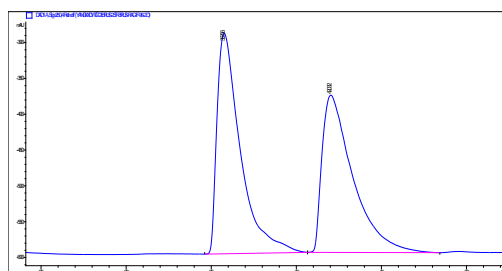

| #     | Time   | Area(%) |
|-------|--------|---------|
| 1     | 35.756 | 51.528  |
| 2     | 42.032 | 48.472  |
| Total |        | 100.000 |

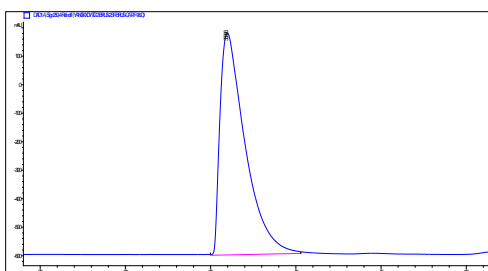

| #     | Time   | Area(%) |
|-------|--------|---------|
| 1     | 35.996 | 100.000 |
| Total |        | 100.000 |

HPLC chromatogram of compound **5g** [Chiralpak IC column, hexane: *i*-PrOH = 90:10, 1.0 mL/min ]

**Racemic HPLC chromatogram**

**Chiral HPLC chromatogram**

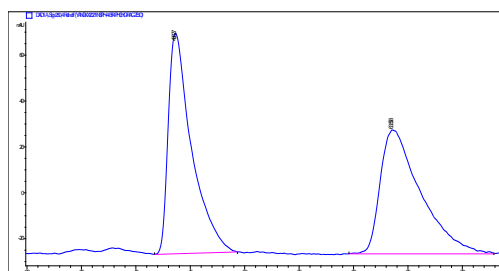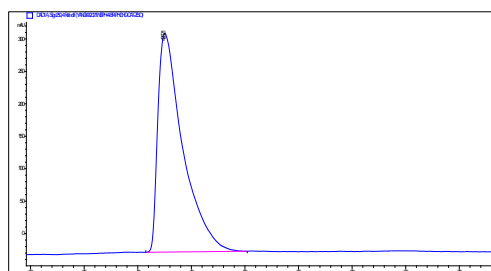

| #     | Time   | Area(%) |
|-------|--------|---------|
| 1     | 43.627 | 50.665  |
| 2     | 63.558 | 49.335  |
| Total |        | 100.000 |

| #     | Time   | Area(%) |
|-------|--------|---------|
| 1     | 42.521 | 100.000 |
| Total |        | 100.000 |

HPLC chromatogram of compound **5h** [Chiralpak IC column, hexane: *i*-PrOH = 90:10, 1.0 mL/min ]

**Racemic HPLC chromatogram**

**Chiral HPLC chromatogram**

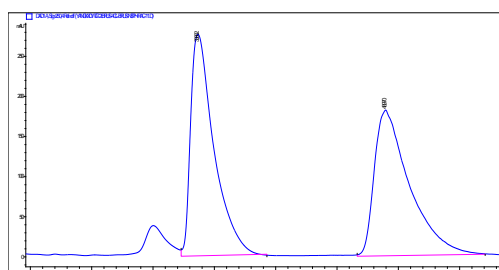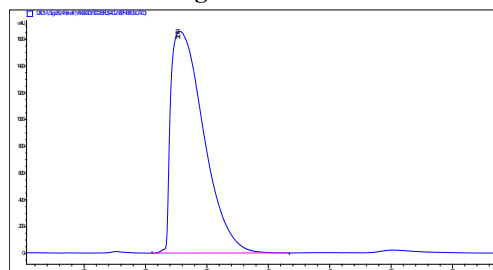

| #     | Time   | Area(%) |
|-------|--------|---------|
| 1     | 33.663 | 50.169  |
| 2     | 48.97  | 49.831  |
| Total |        | 100.000 |

| #     | Time   | Area(%) |
|-------|--------|---------|
| 1     | 32.774 | 100.000 |
| Total |        | 100.000 |

HPLC chromatogram of compound **5i** [Chiralpak IC column, hexane: *i*-PrOH = 90:10, 1.0 mL/min ]

**Racemic HPLC chromatogram**

**Racemic HPLC chromatogram**

**Chiral HPLC chromatogram**

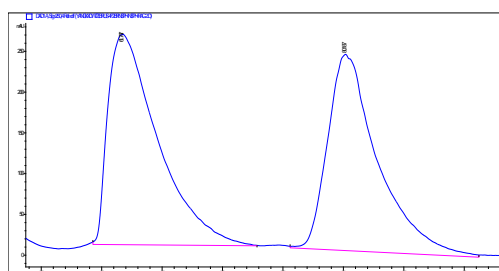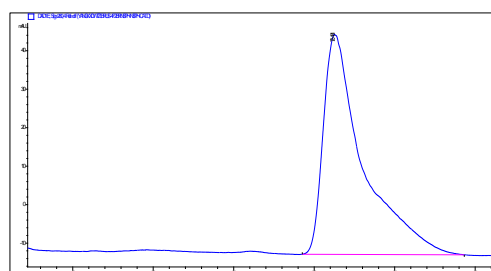

| #     | Time   | Area(%) |
|-------|--------|---------|
| 1     | 61.747 | 51.650  |
| 2     | 80.187 | 48.350  |
| Total |        | 100.000 |

| #     | Time   | Area(%) |
|-------|--------|---------|
| 1     | 72.481 | 100.000 |
| Total |        | 100.000 |

HPLC chromatogram of compound **5j** [Chiralpak IC column, hexane: *i*-PrOH = 97:3, 1.0 mL/min ]

**Racemic HPLC chromatogram**

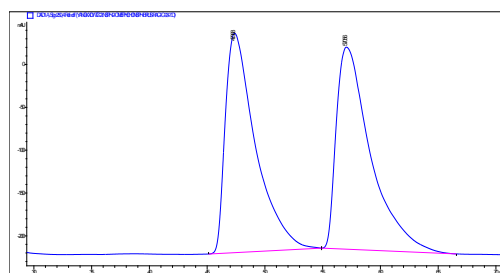

| #     | Time   | Area(%) |
|-------|--------|---------|
| 1     | 47.368 | 48.848  |
| 2     | 57.056 | 51.152  |
| Total |        | 100.000 |

**Chiral HPLC chromatogram**

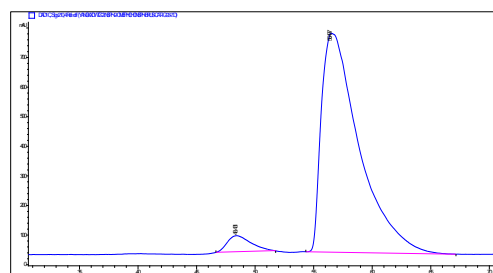

| #     | Time   | Area(%) |
|-------|--------|---------|
| 1     | 48.431 | 4.353   |
| 2     | 56.497 | 95.649  |
| Total |        | 100.000 |

HPLC chromatogram of compound **6c** [Chiralpak IC colun, hexane: *i*-PrOH = 90:10, 1.0 mL/min ]

**Racemic HPLC chromatogram**

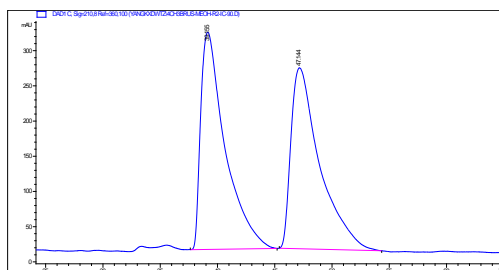

| #     | Time   | Area(%) |
|-------|--------|---------|
| 1     | 39.155 | 50.393  |
| 2     | 47.144 | 49.607  |
| Total |        | 100.000 |

**Chiral HPLC chromatogram**

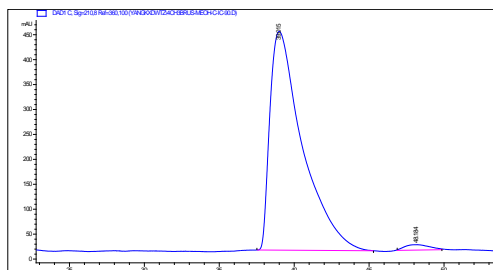

| #     | Time   | Area(%) |
|-------|--------|---------|
| 1     | 39.015 | 98.949  |
| 2     | 48.184 | 1.051   |
| Total |        | 100.000 |

HPLC chromatogram of compound **7a-minor** [Chiralpak IH column, hexane: *i*-PrOH: DCM = 92:3:5, 1.0 mL/min ]

**Racemic HPLC chromatogram**

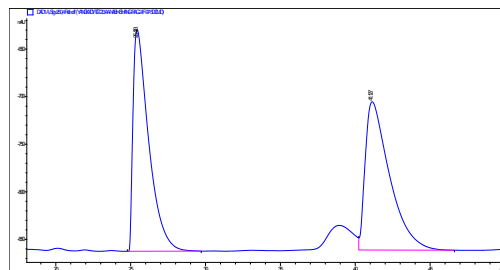

| #     | Time   | Area(%) |
|-------|--------|---------|
| 1     | 25.433 | 49.052  |
| 2     | 41.127 | 50.948  |
| Total |        | 100.000 |

**Chiral HPLC chromatogram**

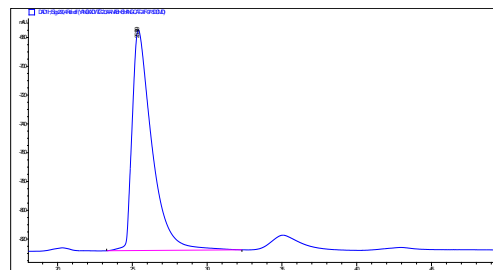

| #     | Time   | Area(%) |
|-------|--------|---------|
| 1     | 25.399 | 100.000 |
| Total |        | 100.000 |

HPLC chromatogram of compound **7a-major** [Chiralpak IH column, hexane: *i*-PrOH: DCM = 92:3:5, 1.0 mL/min ]

**Racemic HPLC chromatogram**

**Chiral HPLC chromatogram**

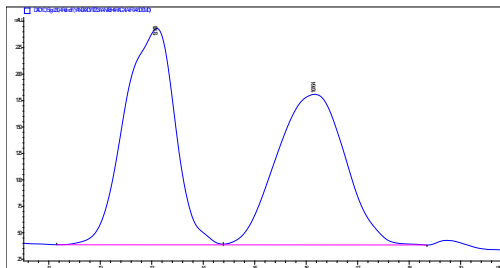

| #     | Time  | Area(%) |
|-------|-------|---------|
| 1     | 13.1  | 50.173  |
| 2     | 16.14 | 49.827  |
| Total |       | 100.000 |

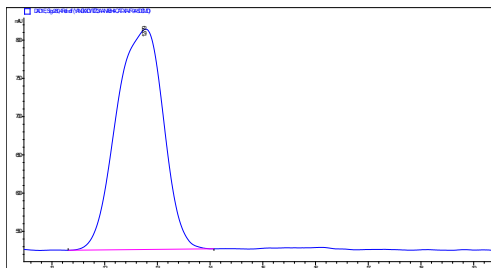

| #     | Time   | Area(%) |
|-------|--------|---------|
| 1     | 12.779 | 98.963  |
| 2     | 16.048 | 1.037   |
| Total |        | 100.000 |

HPLC chromatogram of compound **3a-minor** [Chiralpak Ic column, hexane: *i*-PrOH= 90:10, 1.0 mL/min ]

**Racemic HPLC chromatogram**

**Chiral HPLC chromatogram**

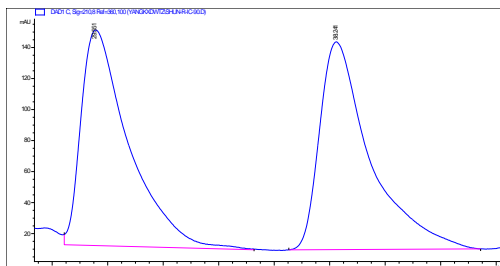

| #     | Time   | Area(%) |
|-------|--------|---------|
| 1     | 29.551 | 49.558  |
| 2     | 38.241 | 50.402  |
| Total |        | 100.000 |

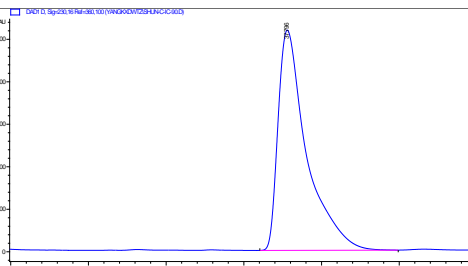

| #     | Time   | Area(%) |
|-------|--------|---------|
| 1     | 37.796 | 100.000 |
| Total |        | 100.000 |
